# Supplementary material for: Highly diastereoselective 1,3-dipolar cycloadditions of chiral non-racemic nitrones to 1,2-diaza-1,3-dienes: an experimental and computational investigation
Source: Royal Society of Chemistry journal article supplement (doi:10.1039/c4ob01371a), 2014-01-01

## Supporting Information

### Highly Diastereoselective 1,3-Dipolar Cycloadditions of Chiral Non-Racemic Nitrones to 1,2-Diaza-1,3-dienes: An Experimental and Computational Investigation

Roberta Majer,<sup>a,b</sup> Olga Konechnaya,<sup>a</sup> Ignacio Delso,<sup>a,c</sup> Tomás Tejero,<sup>a</sup> Orazio A. Attanasi,<sup>\*b</sup>, Stefania Santeusano<sup>b</sup>, Pedro Merino<sup>\*a</sup>

<sup>a</sup>Laboratorio de Síntesis Asimétrica. Departamento de Síntesis y Estructura de Biomoléculas. Instituto de Síntesis Química y Catalisis Homogénea (ISQCH). Universidad de Zaragoza. CSIC. Campus San Francisco. 50009 Zaragoza. Aragón, Spain.

<sup>b</sup>Dipartimento di Scienze Biomolecolari Sezione di Chimica Organica e dei Composti Organici Naturali. Università degli Studi di Urbino "Carlo Bo". Via I Maggetti, 24, 61029 Urbino, Italy.

<sup>c</sup>Servicio de Resonancia Magnética Nuclear. Centro de Química y Materiales de Aragón (CEQMA). Universidad de Zaragoza. CSIC. Campus San Francisco. 50009 Zaragoza. Aragón, Spain.

|                                                                                                 |     |
|-------------------------------------------------------------------------------------------------|-----|
| Tentative assignment of the absolute configuration of compounds <b>13</b> and <b>14</b> . ..... | S2  |
| Reactivity indices .....                                                                        | S4  |
| Absolute and relative free energies .....                                                       | S6  |
| IRC analyses .....                                                                              | S12 |
| Calculations of cycloadditions of nitron <b>9a</b> .....                                        | S16 |
| Cartesian coordinates.....                                                                      | S19 |
| Spectra of compounds .....                                                                      | S89 |

## Tentative assignments of the absolute configuration of compounds **13** and **14**.

Despite the absolute configuration of compounds **13** and **14** cannot be unambiguously assigned due to the rotation around the C $\alpha$ (sugar)-C $_3$ (isoxazolidine) bond, the observed NOE relationships extracted from NOESY experiments allow a tentative assignment on the basis of the observed results. The relative configuration at the isoxazolidine ring (Figure S1, blue arrows) corroborates that both isomers (in the case of **13b**, **13d** and **14b**) are epimeric at C-3 of the isoxazolidine ring, indicating a poor *endo/exo* selectivity but an excellent *Re/Si* diastereofacial selectivity.

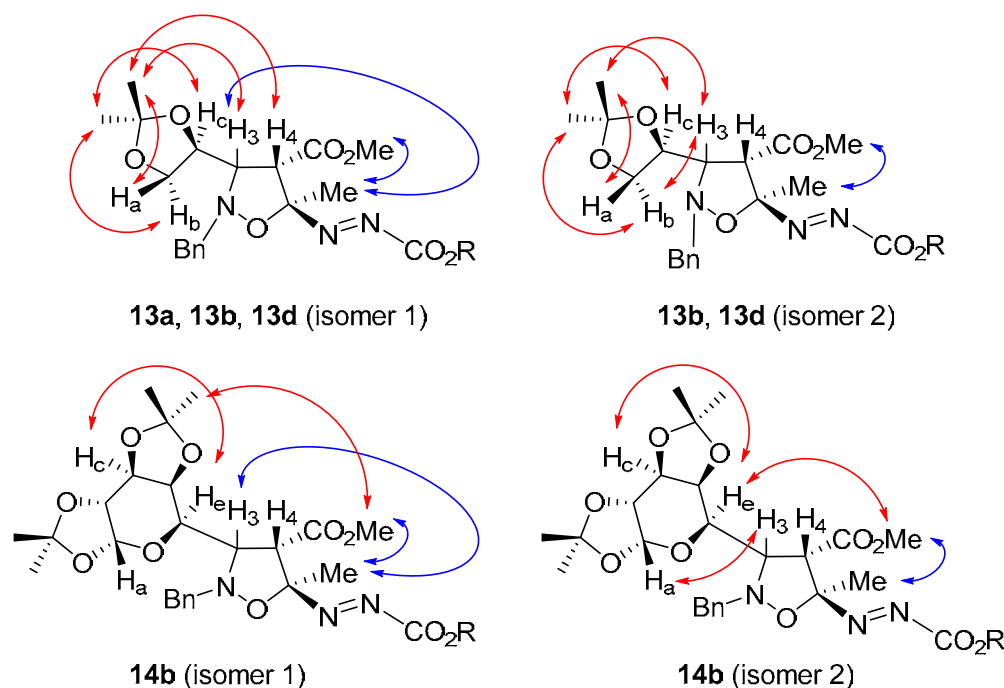

**Figure S1.** NOE relationships observed in NOESY experiments

In order to study the spatial relationships we have performed a simple conformational analysis for models of the four possible remaining isomers corresponding to compounds **13** and **14** (Figure S2). In the case of compounds **13** there are two possible configurations at C-3 for isomer 1 (Figure S2, Gly-**1A**/Gly-**2B** and Gly-**1B**/Gly-**2A**). The observed NOE between the glycerinaldehyde unit and the isoxazolidine ring in isomer 1 (Figure S1, red arrows) is more in agreement with the corresponding model Gly-**2A** thus indicating that a *Si* attack is favored, also in agreement with theoretical calculations. Similar NOE interactions between the glycerinaldehyde unit and the isoxazolidine ring were observed for isomer 2, which is in agreement with the same *Si* attack and, in consequence with Gly-**1B**.

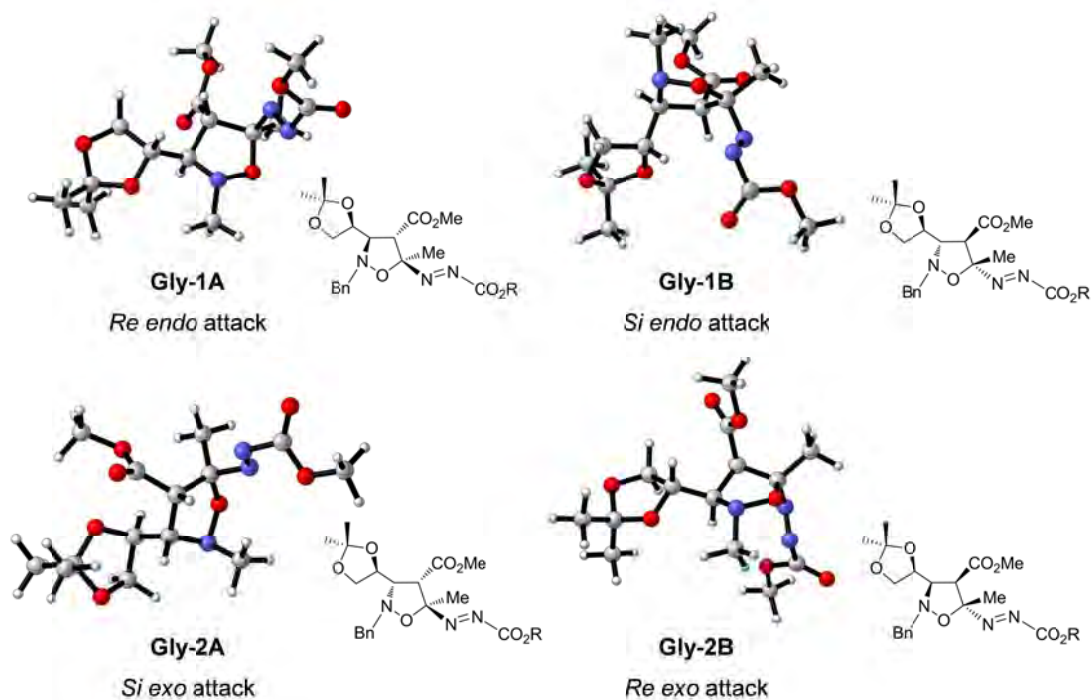

**Figure S2.** Possible configurations for compounds **13**

In a similar way, compound **14b** showed NOE relationships more in agreement with a *Si* attack. Thus, for isomer 1, NOESY results pointed out isomer **Gal-2A** and not **Gal-1A** (Figure S3) as the more plausible configuration. Following the same trend, for isomer 2 NOESY experiments are more in agreement with configuration of **Gal-1B**.

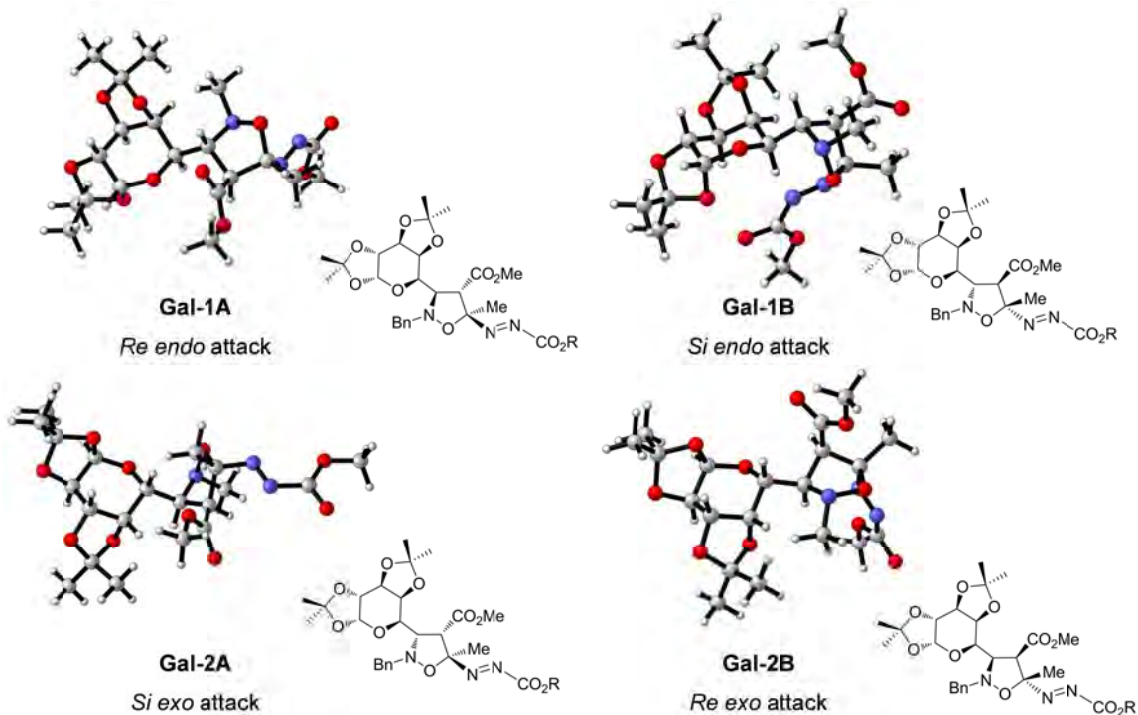

**Figure S3.** Possible configurations for compound **14b**

## Reactivity Indices.

The electronic chemical potential  $\mu$ , that is the negative of electronegativity  $\chi$ , is associated with the charge transfer ability of the system in its ground state geometry and is the index pointing to the direction of the electronic flux during the cycloaddition. It can be approximated, using Koopmans' theorem, to the half value of the sum of the one-electron energies of HOMO and LUMO orbitals (Eq. 1).<sup>1</sup>

$$\mu = \frac{\varepsilon_{\text{HOMO}} + \varepsilon_{\text{LUMO}}}{2} \quad (1)$$

The chemical hardness  $\eta$  (approximated to be the difference between LUMO and HOMO energies) is a measure of the stability of a system, the system having the maximum hardness being the most stable (Eq. 2).<sup>2</sup>

$$\eta = \varepsilon_{\text{HOMO}} - \varepsilon_{\text{LUMO}} \quad (2)$$

The chemical softness parameter  $S$  is strictly related to the chemical hardness and it is due to the inverse of  $2\eta$  (Eq. 3).<sup>3</sup>

$$S = \frac{1}{2\eta} \quad (3)$$

The global electrophilicity power  $\omega$  is a useful descriptor of reactivity that allows a quantitative classification of the global electrophilic character of a molecule,<sup>3</sup> and it is extremely useful for evaluating both Diels-Alder reactions<sup>4</sup> and 1,3-dipolar cycloaddition reactions.<sup>5</sup> The  $\omega$  index measures the stabilization in energy when the

---

<sup>1</sup> (a) Pearson, R. G. *J. Chem. Ed.* **1987**, *64*, 561–567. (b) Parr, R. G.; von Szentpály, L.; Liu, S. *J. Am. Chem. Soc.* **1999**, *121*, 1922–1924.

<sup>2</sup> Domingo, L. R.; Aurell, M. J.; Perez, P.; Contreras, R. *Tetrahedron* **2002**, *58*, 4417–4423.

<sup>3</sup> Chattaraj, P. K.; Sarkar, U.; Roy, D. R. *Chem. Rev.* **2006**, *106*, 2065–2091.

<sup>4</sup> (a) Chandra, A. K.; Nguyen, M. T. *J. Phys. Chem. A* **1998**, *102*, 6181–6185. (b) Chandra, A. K.; Nguyen, M. T. *J. Comput. Chem.* **1998**, *19*, 195–202. (c) Nguyen, T. L.; De Proft, F.; Chandra, A. K.; Uchimaru, T.; Nguyen, M. T.; Geerlings, P. *J. Org. Chem.* **2001**, *66*, 6096–6103. (d) Sengupta, D.; Chandra, A. K.; Nguyen, M. T. *J. Org. Chem.* **1997**, *62*, 6404–6406. (e) Damoun, S.; Van de Woude, G.; Mendez, F.; Geerlings, P. *J. Phys. Chem. A* **1997**, *101*, 886–893.

<sup>5</sup> (a) Parr, R. G.; Pearson, R. G. *J. Am. Chem. Soc.* **1983**, *105*, 7512–7516. (b) Parr, R. G.; Yang, W. In *Density Functional Theory of Atoms and Molecules*; Oxford University, New York, 1989.

system acquires an additional electronic charge  $\Delta N$  from the environment and it is defined as illustrated in Eq. 4.<sup>6</sup>

$$\omega = \frac{\mu^2}{2\eta} \quad (4)$$

The maximum amount of electronic charge that the electrophile system may accept is given by:

$$\Delta N_{\max} = -\frac{\mu}{\eta} \quad (5)$$

The Fukui function<sup>7</sup> for electrophilic ( $f_k^-$ ) and nucleophilic attack ( $f_k^+$ ) can be expressed as indicated in Eqs. 6 and 7, respectively, where  $\rho_k(N)$ ,  $\rho_k(N-1)$  and  $\rho_k(N+1)$  are the gross electronic population of the site k in neutral, cationic and anionic systems, respectively.

$$f_k^- = [\rho_k(N) - \rho_k(N-1)] \quad (6)$$

$$f_k^+ = [\rho_k(N+1) - \rho_k(N)] \quad (7)$$

The local electrophilicity index,  $\omega_k$  condensed to atom k is obtained by projecting the global quantity on the corresponding atomic center k in the molecule by using the electrophilic Fukui function (Eq. 8).<sup>8</sup>

$$\omega_k = \omega f_k^+ \quad (8)$$

---

<sup>6</sup> Perez, P.; Domingo, L. R.; Aurell, M. J.; Contreras, R. *Tetrahedron* **2003**, *59*, 3117–3125.

<sup>7</sup> (a) Fukui, K. *Science* **1982**, *218*, 747-754. (b) Parr, R. G.; Yang, W. *J. Am. Chem. Soc.* **1984**, *106*, 4049-4050.

<sup>8</sup> Domingo, L. R.; Aurell, M. J.; Perez, P. *J. Phys. Chem. A*, **2002**, *106*, 6871-6875.

**Table S1.** Absolute ( $\Delta E$  and  $\Delta G$ , hartrees) and relative ( $\Delta\Delta E$  and  $\Delta\Delta G$ , kcal/mol) electronic (E) and free (G) energies for the reaction between nitrene **N1** and diazadiene **D1** calculated at  $2\zeta$  and single point  $3\zeta$  levels

|             | B3LYP/6-31G(d)/PCM=MeCN |                    |              |                    | M06-2X/6-31G(d)/PCM=MeCN |                    |              |                    | PCM=MeCN/M06-2X/6-311+G(d,p) // M06-2X/6-31G(d)/PCM=MeCN |                    |              |                    |
|-------------|-------------------------|--------------------|--------------|--------------------|--------------------------|--------------------|--------------|--------------------|----------------------------------------------------------|--------------------|--------------|--------------------|
|             | $\Delta E$              | $\Delta\Delta E^a$ | $\Delta G$   | $\Delta\Delta G^a$ | $\Delta E$               | $\Delta\Delta E^a$ | $\Delta G$   | $\Delta\Delta G^a$ | $\Delta E$                                               | $\Delta\Delta E^a$ | $\Delta G$   | $\Delta\Delta G^a$ |
| <b>N1</b>   | -400.923426             |                    | -400.956252  |                    | -400.742372              |                    | -400.774806  |                    | -400.869673                                              |                    | -400.901815  |                    |
| <b>D1</b>   | -682.943672             |                    | -682.987153  |                    | -682.657710              |                    | -682.700079  |                    | -682.867038                                              |                    | -682.907969  |                    |
| <b>TS1a</b> | -1083.842795            | 15.3               | -1083.897251 | 29.0               | -1083.390158             | 6.2                | -1083.442762 | 20.2               | -1083.720308                                             | 10.3               | -1083.770573 | 24.6               |
| <b>TS2a</b> | -1083.841825            | 15.9               | -1083.895257 | 30.2               | -1083.390662             | 5.9                | -1083.441230 | 21.1               | -1083.719563                                             | 10.8               | -1083.768664 | 25.8               |
| <b>TS3a</b> | -1083.850390            | 10.5               | -1083.905523 | 23.8               | -1083.395099             | 3.1                | -1083.448508 | 16.6               | -1083.725331                                             | 7.1                | -1083.776232 | 21.1               |
| <b>TS4a</b> | -1083.849864            | 10.8               | -1083.903557 | 25.0               | -1083.395455             | 2.9                | -1083.447954 | 16.9               | -1083.724332                                             | 7.8                | -1083.775225 | 21.7               |
| <b>P1a</b>  | -1083.872659            | -3.5               | -1083.926630 | 10.5               | -1083.439644             | -24.8              | -1083.490774 | -10.0              | -1083.765921                                             | -18.3              | -1083.815036 | -3.3               |
| <b>P2a</b>  | -1083.865895            | 0.8                | -1083.919127 | 15.2               | -1083.435207             | -22.0              | -1083.485469 | -6.6               | -1083.760785                                             | -15.1              | -1083.808927 | 0.5                |
| <b>P3a</b>  | -1083.866209            | 0.6                | -1083.919294 | 15.1               | -1083.433342             | -20.9              | -1083.483885 | -5.7               | -1083.760101                                             | -14.7              | -1083.808915 | 0.6                |
| <b>P4a</b>  | -1083.881797            | -9.2               | -1083.935268 | 5.1                | -1083.449114             | -30.8              | -1083.500763 | -16.2              | -1083.774519                                             | -23.7              | -1083.823764 | -8.8               |

<sup>a</sup> Referred to starting reagents. (**N1+D1**).

**Table S2.** Absolute ( $\Delta E$  and  $\Delta G$ , hartrees) and relative ( $\Delta\Delta E$  and  $\Delta\Delta G$ , kcal/mol) electronic (E) and free (G) energies for the reaction between nitrene **N1** and diazadiene **D2** calculated at  $2\zeta$  and single point  $3\zeta$  levels

|             | B3LYP/6-31G(d)/PCM=MeCN |                    |              |                    | M06-2X/6-31G(d)/PCM=MeCN |                    |              |                    | PCM=MeCN/M06-2X/6-311+G(d,p) // M06-2X/6-31G(d)/PCM=MeCN |                    |              |                    |
|-------------|-------------------------|--------------------|--------------|--------------------|--------------------------|--------------------|--------------|--------------------|----------------------------------------------------------|--------------------|--------------|--------------------|
|             | $\Delta E$              | $\Delta\Delta E^a$ | $\Delta G$   | $\Delta\Delta G^a$ | $\Delta E$               | $\Delta\Delta E^a$ | $\Delta G$   | $\Delta\Delta G^a$ | $\Delta E$                                               | $\Delta\Delta E^a$ | $\Delta G$   | $\Delta\Delta G^a$ |
| <b>N1</b>   | -400.923426             |                    | -400.956252  |                    | -400.742372              |                    | -400.774806  |                    | -400.869673                                              |                    | -400.901815  |                    |
| <b>D2</b>   | -623.794691             |                    | -623.836681  |                    | -623.533447              |                    | -623.575079  |                    | -623.730487                                              |                    | -623.770211  |                    |
| <b>TS1b</b> | -1024.691931            | 16.4               | -1024.744225 | 30.6               | -1024.264948             | 6.8                | -1024.315111 | 21.8               | -1024.583316                                             | 10.6               | -1024.631802 | 25.2               |
| <b>TS2b</b> | -1024.690419            | 17.4               | -1024.741931 | 32.0               | -1024.265462             | 6.5                | -1024.314744 | 22.1               | -1024.582483                                             | 11.1               | -1024.629999 | 26.4               |
| <b>TS3b</b> | -1024.699049            | 12.0               | -1024.751972 | 25.7               | -1024.268376             | 4.7                | -1024.319074 | 19.3               | -1024.586543                                             | 8.5                | -1024.635637 | 22.8               |
| <b>TS4b</b> | -1024.698384            | 12.4               | -1024.750645 | 26.5               | -1024.269354             | 4.1                | -1024.320352 | 18.5               | -1024.586180                                             | 8.8                | -1024.635334 | 23.0               |
| <b>P1b</b>  | -1024.724060            | -3.7               | -1024.774688 | 11.5               | -1024.315311             | -24.8              | -1024.364022 | -8.9               | -1024.629218                                             | -18.2              | -1024.676329 | -27.9              |
| <b>P2b</b>  | -1024.716485            | 1.0                | -1024.766711 | 16.5               | -1024.310371             | -21.7              | -1024.358990 | -5.7               | -1024.623589                                             | -14.7              | -1024.670256 | -24.1              |
| <b>P3b</b>  | -1024.716737            | 0.9                | -1024.767251 | 16.1               | -1024.308198             | -20.3              | -1024.356525 | -4.2               | -1024.622776                                             | -14.2              | -1024.669388 | -23.6              |
| <b>P4b</b>  | -1024.732475            | -9.0               | -1024.784279 | 5.4                | -1024.324522             | -30.6              | -1024.375131 | -15.8              | -1024.637493                                             | -23.4              | -1024.685152 | -33.5              |

<sup>a</sup> Referred to starting reagents. (**N1+D2**).

**Table S3.** Absolute ( $\Delta E$  and  $\Delta G$ , hartrees) and relative ( $\Delta\Delta E$  and  $\Delta\Delta G$ , kcal/mol) electronic (E) and free (G) energies for the reaction between nitrene **N2** and diazadiene **D1** calculated at  $2\zeta$  and single point  $3\zeta$  levels.

|             | B3LYP/6-31G(d)/PCM=MeCN |                    |              |                    | M06-2X/6-31G(d)/PCM=MeCN |                    |              |                    | PCM=MeCN/M06-2X/6-311+G(d,p) // M06-2X/6-31G(d)/PCM=MeCN |                    |              |                    |
|-------------|-------------------------|--------------------|--------------|--------------------|--------------------------|--------------------|--------------|--------------------|----------------------------------------------------------|--------------------|--------------|--------------------|
|             | $\Delta E$              | $\Delta\Delta E^a$ | $\Delta G$   | $\Delta\Delta G^a$ | $\Delta E$               | $\Delta\Delta E^a$ | $\Delta G$   | $\Delta\Delta G^a$ | $\Delta E$                                               | $\Delta\Delta E^a$ | $\Delta G$   | $\Delta\Delta G^a$ |
| <b>N2</b>   | -554.718674             |                    | -554.757060  |                    | -554.475492              |                    | -554.512230  |                    | -554.647854                                              |                    | -554.684204  |                    |
| <b>D1</b>   | -682.943672             |                    | -682.987153  |                    | -682.657710              |                    | -682.700079  |                    | -682.867038                                              |                    | -682.907969  |                    |
| <b>TS5a</b> | -1237.635330            | 17.0               | -1237.694479 | 31.2               | -1237.120121             | 8.2                | -1237.177045 | 22.1               | -1237.496105                                             | 11.8               | -1237.550930 | 25.9               |
| <b>TS6a</b> | -1237.637077            | 15.9               | -1237.696405 | 30.0               | -1237.121079             | 7.6                | -1237.178556 | 21.9               | -1237.496174                                             | 11.8               | -1237.551485 | 25.5               |
| <b>TS7a</b> | -1237.632438            | 18.8               | -1237.691325 | 33.2               | -1237.117996             | 9.5                | -1237.173991 | 24.0               | -1237.494037                                             | 13.1               | -1237.547956 | 27.8               |
| <b>TS8a</b> | -1237.638074            | 15.2               | -1237.696930 | 29.7               | -1237.125234             | 5.0                | -1237.181058 | 19.6               | -1237.499873                                             | 9.4                | -1237.553896 | 24.0               |
| <b>P5a</b>  | -1237.683058            | -13.0              | -1237.742054 | 1.4                | -1237.183526             | -31.9              | -1237.240574 | -17.7              | -1237.557012                                             | -26.4              | -1237.612008 | -12.5              |
| <b>P6a</b>  | -1237.679757            | -10.9              | -1237.738278 | 3.7                | -1237.178051             | -28.1              | -1237.234945 | -14.2              | -1237.550842                                             | -22.6              | -1237.605269 | -8.2               |
| <b>P7a</b>  | -1237.676125            | -8.7               | -1237.735242 | 5.6                | -1237.182544             | -31.0              | -1237.236708 | -15.3              | -1237.553043                                             | -23.9              | -1237.607130 | -9.4               |
| <b>P8a</b>  | -1237.675015            | -8.0               | -1237.732215 | 7.5                | -1237.180543             | -29.7              | -1237.236810 | -15.4              | -1237.553998                                             | -24.5              | -1237.606493 | -9.0               |

<sup>a</sup> Referred to starting reagents. (**N2+D1**).

**Table S4.** Absolute ( $\Delta E$  and  $\Delta G$ , hartrees) and relative ( $\Delta\Delta E$  and  $\Delta\Delta G$ , kcal/mol) electronic (E) and free (G) energies for the reaction between nitrene **N2** and diazadiene **D2** calculated at  $2\zeta$  and single point  $3\zeta$  levels.

|             | B3LYP/6-31G(d)/PCM=MeCN |                    |              |                    | M06-2X/6-31G(d)/PCM=MeCN |                    |              |                    | PCM=MeCN/M06-2X/6-311+G(d,p) // M06-2X/6-31G(d)/PCM=MeCN |                    |              |                    |
|-------------|-------------------------|--------------------|--------------|--------------------|--------------------------|--------------------|--------------|--------------------|----------------------------------------------------------|--------------------|--------------|--------------------|
|             | $\Delta E$              | $\Delta\Delta E^a$ | $\Delta G$   | $\Delta\Delta G^a$ | $\Delta E$               | $\Delta\Delta E^a$ | $\Delta G$   | $\Delta\Delta G^a$ | $\Delta E$                                               | $\Delta\Delta E^a$ | $\Delta G$   | $\Delta\Delta G^a$ |
| <b>N2</b>   | -554.718674             |                    | -554.757060  |                    | -554.475492              |                    | -554.512230  |                    | -554.647854                                              |                    | -554.684204  |                    |
| <b>D2</b>   | -623.794691             |                    | -623.836681  |                    | -623.533447              |                    | -623.575079  |                    | -623.730487                                              |                    | -623.770211  |                    |
| <b>TS5b</b> | -1178.486519            | 16.9               | -1178.543988 | 31.2               | -1177.996088             | 8.1                | -1178.051297 | 22.6               | -1178.359736                                             | 11.7               | -1178.412494 | 26.3               |
| <b>TS6b</b> | -1178.488091            | 15.9               | -1178.545562 | 30.2               | -1177.996346             | 7.9                | -1178.052047 | 22.1               | -1178.359618                                             | 11.8               | -1178.412804 | 26.1               |
| <b>TS7b</b> | -1178.482536            | 19.4               | -1178.538551 | 34.6               | -1177.993644             | 9.6                | -1178.047858 | 24.8               | -1178.358069                                             | 12.7               | -1178.410559 | 27.5               |
| <b>TS8b</b> | -1178.488104            | 15.9               | -1178.544308 | 31.0               | -1178.000272             | 5.4                | -1178.054230 | 20.8               | -1178.363188                                             | 9.5                | -1178.415124 | 24.7               |
| <b>P5b</b>  | -1178.534822            | -13.5              | -1178.592192 | 1.0                | -1178.059631             | -31.8              | -1178.114936 | -17.3              | -1178.420160                                             | -26.2              | -1178.473215 | -11.8              |
| <b>P6b</b>  | -1178.529849            | -10.3              | -1178.586697 | 4.4                | -1178.053293             | -27.8              | -1178.107918 | -12.9              | -1178.413284                                             | -21.9              | -1178.465638 | -7.0               |
| <b>P7b</b>  | -1178.528358            | -9.4               | -1178.584235 | 6.0                | -1178.057060             | -30.2              | -1178.111871 | -15.4              | -1178.416188                                             | -23.8              | -1178.468762 | -9.0               |
| <b>P8b</b>  | -1178.526037            | -8.0               | -1178.581153 | 7.9                | -1178.058301             | -31.0              | -1178.110471 | -14.5              | -1178.417010                                             | -24.3              | -1178.467729 | -8.4               |

<sup>a</sup> Referred to starting reagents. (**N2+D2**).

**Table S5.** Absolute ( $\Delta E$  and  $\Delta G$ , hartrees) and relative ( $\Delta\Delta E$  and  $\Delta\Delta G$ , kcal/mol) electronic (E) and free (G) energies for the cycloaddition between nitrene **N1** and diazadiene **D1** calculated at 3 $\zeta$  levels.

|                        | B3LYP-GD3BJ/6-311G(d,p)/PCM=MeCN |                    |              |                    | M06-2X/ccpVTZ/PCM=MeCN |                    |              |                    |
|------------------------|----------------------------------|--------------------|--------------|--------------------|------------------------|--------------------|--------------|--------------------|
|                        | $\Delta E$                       | $\Delta\Delta E^a$ | $\Delta G$   | $\Delta\Delta G^a$ | $\Delta E$             | $\Delta\Delta E^a$ | $\Delta G$   | $\Delta\Delta G^a$ |
| <b>N1</b>              | -400.904914                      |                    | -400.934672  |                    | -400.904939            |                    | -400.937506  |                    |
| <b>D1</b>              | -682.965426                      |                    | -683.000565  |                    | -682.929675            |                    | -682.972361  |                    |
| <b>C1a<sup>b</sup></b> | -1084.237301                     | -7.5               | -1084.293544 | 5.5                | -1083.839661           | -3.2               | -1083.892845 | 10.7               |
| <b>C2a<sup>c</sup></b> | -1084.239702                     | -9.0               | -1084.295394 | 4.3                | -1083.844284           | -6.1               | -1083.894624 | 9.6                |
| <b>C3a<sup>d</sup></b> | -1084.238459                     | -8.2               | -1084.294926 | 4.6                | -1083.841989           | -4.6               | -1083.892823 | 10.7               |
| <b>C4a<sup>e</sup></b> | -1084.240702                     | -9.6               | -1084.297327 | 3.1                | -1083.843231           | -5.4               | -1083.895478 | 9.0                |
| <b>TS1a</b>            | -1084.214376                     | 6.9                | -1084.269418 | 20.6               | -1083.816437           | 11.4               | -1083.868630 | 25.9               |
| <b>TS2a</b>            | -1084.214085                     | 7.1                | -1084.267601 | 21.8               | -1083.815344           | 12.1               | -1083.866330 | 27.3               |
| <b>TS3a</b>            | -1084.221543                     | 2.4                | -1084.277393 | 15.6               | -1083.821499           | 8.2                | -1083.874825 | 22.0               |
| <b>TS4a</b>            | -1084.221920                     | 2.2                | -1084.275609 | 16.7               | -1083.820846           | 8.6                | -1083.873403 | 22.9               |
| <b>P1a</b>             | -1084.242658                     | -10.8              | -1084.296826 | 3.4                | -1083.862469           | -17.5              | -1083.913799 | -2.5               |
| <b>P2a</b>             | -1084.237541                     | -7.6               | -1084.290265 | 7.5                | -1083.857548           | -14.4              | -1083.908045 | 1.1                |
| <b>P3a</b>             | -1084.238123                     | -8.0               | -1084.290905 | 7.1                | -1083.856966           | -14.0              | -1083.908021 | 1.2                |
| <b>P4a</b>             | -1084.252623                     | -17.1              | -1084.306508 | -2.7               | -1083.870862           | -22.7              | -1083.922089 | -7.7               |

<sup>a</sup> Referred to starting reagents. (**N2+D1**). <sup>b</sup> encounter complex previous to the formation of **TS1a**. <sup>c</sup> encounter complex previous to the formation of **TS2a**. <sup>d</sup> encounter complex previous to the formation of **TS3a**. <sup>e</sup> encounter complex previous to the formation of **TS4a**.



**Table S6.** Absolute ( $\Delta E$  and  $\Delta G$ , hartrees) and relative ( $\Delta\Delta E$  and  $\Delta\Delta G$ , kcal/mol) electronic (E) and free (G) energies for the cycloaddition between nitrene **N1** and diazadiene **D2** calculated at  $3\zeta$  levels.

|                        | B3LYP-GD3BJ/6-311G(d,p)/PCM=MeCN |                    |              |                    | M06-2X/ccpVTZ/PCM=MeCN |                    |              |                    |
|------------------------|----------------------------------|--------------------|--------------|--------------------|------------------------|--------------------|--------------|--------------------|
|                        | $\Delta E$                       | $\Delta\Delta E^a$ | $\Delta G$   | $\Delta\Delta G^a$ | $\Delta E$             | $\Delta\Delta E^a$ | $\Delta G$   | $\Delta\Delta G^a$ |
| <b>N1</b>              | -400.904914                      |                    | -400.934672  |                    | -400.904939            |                    | -400.937506  |                    |
| <b>D2</b>              | -623.816925                      |                    | -623.852407  |                    | -623.785899            |                    | -623.828581  |                    |
| <b>C1b<sup>b</sup></b> | -1025.074815                     | -7.5               | -1025.127455 | 6.6                | -1024.695859           | -3.2               | -1024.746127 | 12.5               |
| <b>C2b<sup>c</sup></b> | -1025.076677                     | -8.7               | -1025.130485 | 4.7                | -1024.698060           | -4.5               | -1024.750889 | 9.5                |
| <b>C3b<sup>d</sup></b> | -1025.075676                     | -8.1               | -1025.130731 | 4.5                | -1024.696374           | -3.5               | -1024.749485 | 10.4               |
| <b>C4b<sup>e</sup></b> | -1025.077454                     | -9.2               | -1025.129900 | 5.1                | -1024.698597           | -4.9               | -1024.749139 | 10.6               |
| <b>TS1b</b>            | -1025.050246                     | 7.9                | -1025.103789 | 21.5               | -1024.672299           | 11.6               | -1024.722840 | 27.1               |
| <b>TS2b</b>            | -1025.049274                     | 8.5                | -1025.100601 | 23.5               | -1024.671414           | 12.2               | -1024.721385 | 28.1               |
| <b>TS3b</b>            | -1025.057147                     | 3.6                | -1025.110490 | 17.3               | -1024.677215           | 8.5                | -1024.728752 | 23.4               |
| <b>TS4b</b>            | -1025.057035                     | 3.6                | -1025.108983 | 18.2               | -1024.675893           | 9.4                | -1024.726466 | 24.9               |
| <b>P1b</b>             | -1025.080091                     | -10.8              | -1025.131221 | 4.2                | -1024.718428           | -17.3              | -1024.767394 | -0.8               |
| <b>P2b</b>             | -1025.073876                     | -6.9               | -1025.124373 | 8.5                | -1024.718119           | -17.1              | -1024.764285 | 1.1                |
| <b>P3b</b>             | -1025.075403                     | -7.9               | -1025.125581 | 7.8                | -1024.713045           | -13.9              | -1024.762595 | 2.2                |
| <b>P4b</b>             | -1025.089144                     | -16.5              | -1025.140523 | -1.6               | -1024.726705           | -22.5              | -1024.776517 | -6.5               |

<sup>a</sup> Referred to starting reagents. (**N2+D1**). <sup>b</sup> encounter complex previous to the formation of **TS1b**. <sup>c</sup> encounter complex previous to the formation of **TS2b**. <sup>d</sup> encounter complex previous to the formation of **TS3b**. <sup>e</sup> encounter complex previous to the formation of **TS4b**.

**Table S7.** Absolute ( $\Delta E$  and  $\Delta G$ , hartrees) and relative ( $\Delta\Delta E$  and  $\Delta\Delta G$ , kcal/mol) electronic (E) and free (G) energies for the cycloaddition between nitrene **N2** and diazadiene **D1** calculated at 3 $\zeta$  levels.

|                        | B3LYP-GD3BJ/6-311G(d,p)/PCM=MeCN |                    |              |                    | M06-2X/ccpVTZ/PCM=MeCN |                    |              |                    |
|------------------------|----------------------------------|--------------------|--------------|--------------------|------------------------|--------------------|--------------|--------------------|
|                        | $\Delta E$                       | $\Delta\Delta E^a$ | $\Delta G$   | $\Delta\Delta G^a$ | $\Delta E$             | $\Delta\Delta E^a$ | $\Delta G$   | $\Delta\Delta G^a$ |
| <b>N2</b>              | -554.910259                      |                    | -554.948318  |                    | -554.697990            |                    | -554.734824  |                    |
| <b>D1</b>              | -683.166216                      |                    | -683.210346  |                    | -682.929675            |                    | -682.972361  |                    |
| <b>C5a<sup>b</sup></b> | -1238.086428                     | -6.2               | -1238.146966 | 7.3                | -1237.629267           | -1.0               | -1237.686327 | 13.1               |
| <b>C6a<sup>c</sup></b> | -1238.090042                     | -8.5               | -1238.152181 | 4.1                | -1237.632461           | -3.0               | -1237.686152 | 13.2               |
| <b>C7a<sup>d</sup></b> | -1238.083672                     | -4.5               | -1238.144146 | 9.1                | -1237.627019           | 0.4                | -1237.683416 | 14.9               |
| <b>C8a<sup>e</sup></b> | -1238.091284                     | -9.3               | -1238.151301 | 4.6                | -1237.633952           | -3.9               | -1237.688901 | 11.5               |
| <b>TS5a</b>            | -1238.064334                     | 7.6                | -1238.124586 | 21.4               | -1237.606874           | 13.0               | -1237.664292 | 26.9               |
| <b>TS6a</b>            | -1238.066261                     | 6.4                | -1238.125416 | 20.9               | -1237.603210           | 15.3               | -1237.657486 | 31.2               |
| <b>TS7a</b>            | -1238.062661                     | 8.7                | -1238.122407 | 22.8               | -1237.605148           | 14.1               | -1237.661424 | 28.7               |
| <b>TS8a</b>            | -1238.068069                     | 5.3                | -1238.126109 | 20.4               | -1237.611109           | 10.4               | -1237.668002 | 24.6               |
| <b>P5a</b>             | -1238.107085                     | -19.2              | -1238.166620 | -5.0               | -1237.668530           | -25.6              | -1237.726429 | -12.1              |
| <b>P6a</b>             | -1238.105566                     | -18.3              | -1238.165084 | -4.0               | -1237.666256           | -24.2              | -1237.723389 | -10.2              |
| <b>P7a</b>             | -1238.103861                     | -17.2              | -1238.163319 | -2.9               | -1237.664200           | -22.9              | -1237.721230 | -8.8               |
| <b>P8a</b>             | -1238.104642                     | -17.7              | -1238.159470 | -0.5               | -1237.664662           | -23.2              | -1237.719691 | -7.8               |

<sup>a</sup> Referred to starting reagents. (**N2+D1**). <sup>b</sup> encounter complex previous to the formation of **TS5a**. <sup>c</sup> encounter complex previous to the formation of **TS6a**. <sup>d</sup> encounter complex previous to the formation of **TS7a**. <sup>e</sup> encounter complex previous to the formation of **TS8a**.

**Table S8.** Absolute ( $\Delta E$  and  $\Delta G$ , hartrees) and relative ( $\Delta\Delta E$  and  $\Delta\Delta G$ , kcal/mol) electronic (E) and free (G) energies for the cycloaddition between nitrene **N2** and diazadiene **D2** calculated at 3 $\zeta$  levels.

|                        | B3LYP-GD3BJ/6-311G(d,p)/PCM=MeCN |                    |              |                    | M06-2X/ccpVTZ/PCM=MeCN |                    |              |                    |
|------------------------|----------------------------------|--------------------|--------------|--------------------|------------------------|--------------------|--------------|--------------------|
|                        | $\Delta E$                       | $\Delta\Delta E^a$ | $\Delta G$   | $\Delta\Delta G^a$ | $\Delta E$             | $\Delta\Delta E^a$ | $\Delta G$   | $\Delta\Delta G^a$ |
| <b>N2</b>              | -554.910259                      |                    | -554.948318  |                    | -554.697990            |                    | -554.734824  |                    |
| <b>D2</b>              | 623.816925                       |                    | -623.852407  |                    | -623.785899            |                    | -623.828581  |                    |
| <b>C5b<sup>b</sup></b> | -1178.924454                     | -6.6               | -1178.985012 | 5.9                | -1178.485478           | -1.0               | -1178.541928 | 13.5               |
| <b>C6b<sup>c</sup></b> | -1178.927452                     | -8.5               | -1178.987226 | 4.5                | -1178.488718           | -3.0               | -1178.545108 | 11.5               |
| <b>C7b<sup>d</sup></b> | -1178.921413                     | -4.7               | -1178.980877 | 8.5                | -1178.483755           | 0.1                | -1178.539856 | 14.8               |
| <b>C8b<sup>e</sup></b> | -1178.928370                     | -9.1               | -1178.986791 | 4.8                | -1178.490201           | -4.0               | -1178.543609 | 12.4               |
| <b>TS5b</b>            | -1178.902118                     | 7.4                | -1178.959222 | 22.1               | -1178.463018           | 13.1               | -1178.517506 | 28.8               |
| <b>TS6b</b>            | -1178.903658                     | 6.4                | -1178.958722 | 22.4               | -1178.463071           | 13.1               | -1178.518166 | 28.4               |
| <b>TS7b</b>            | -1178.899959                     | 8.8                | -1178.954215 | 25.2               | -1178.460901           | 14.4               | -1178.514804 | 30.5               |
| <b>TS8b</b>            | -1178.905423                     | 5.3                | -1178.962195 | 20.2               | -1178.466678           | 10.8               | -1178.520479 | 26.9               |
| <b>P5b</b>             | -1178.944204                     | -19.0              | -1178.999793 | -3.4               | -1178.523738           | -25.0              | -1178.579236 | -9.9               |
| <b>P6b</b>             | -1178.942322                     | -17.8              | -1178.998877 | -2.8               | -1178.521806           | -23.8              | -1178.577129 | -8.6               |
| <b>P7b</b>             | -1178.940892                     | -16.9              | -1178.995031 | -0.4               | -1178.519943           | -22.6              | -1178.574930 | -7.2               |
| <b>P8b</b>             | -1178.941824                     | -17.5              | -1178.994088 | 0.2                | -1178.521224           | -23.4              | -1178.574580 | -7.0               |

<sup>a</sup> Referred to starting reagents. (**N2+D1**). <sup>b</sup> encounter complex previous to the formation of **TS5b**. <sup>c</sup> encounter complex previous to the formation of **TS6b**. <sup>d</sup> encounter complex previous to the formation of **TS7b**. <sup>e</sup> encounter complex previous to the formation of **TS8b**.

## IRC Analyses

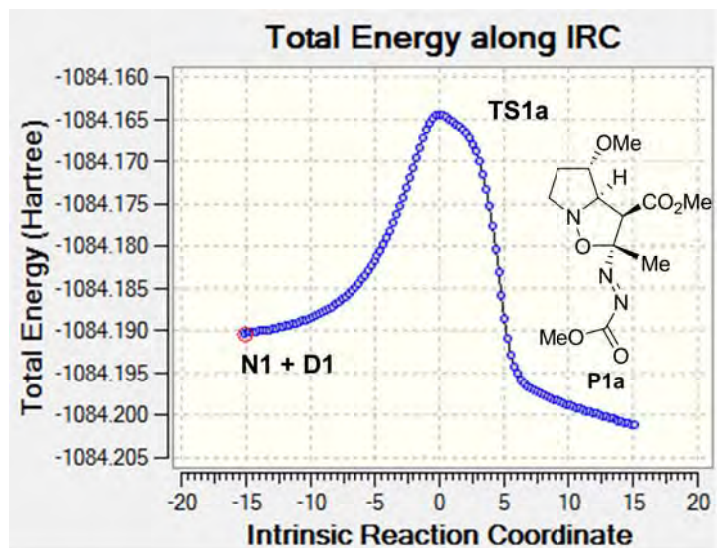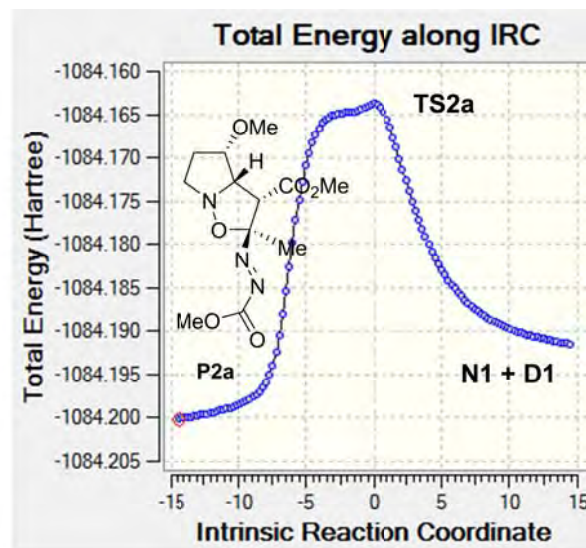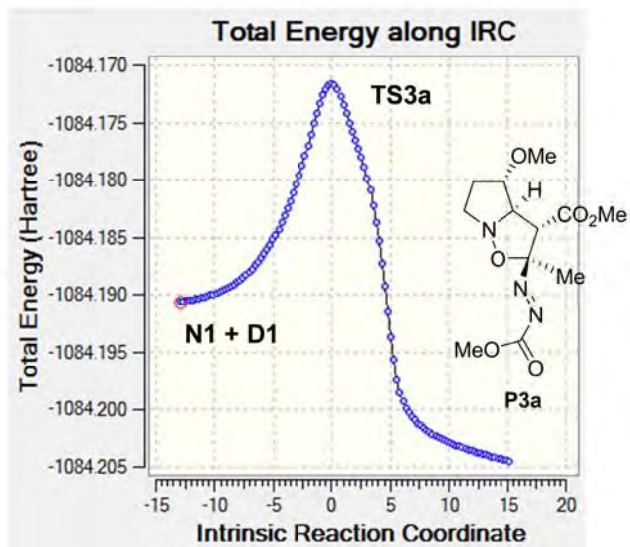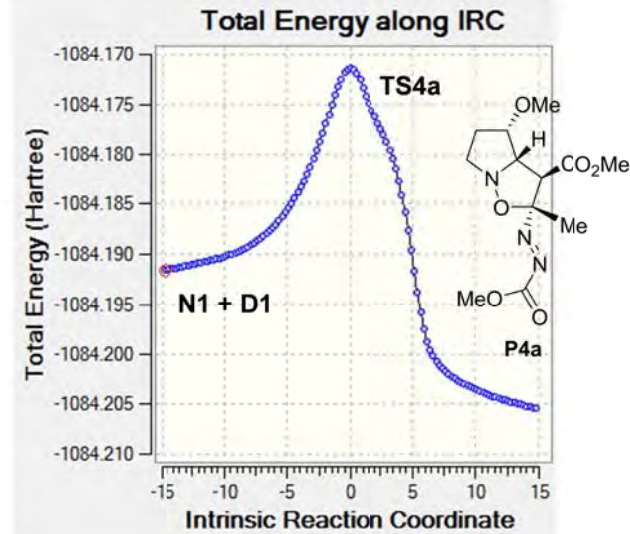

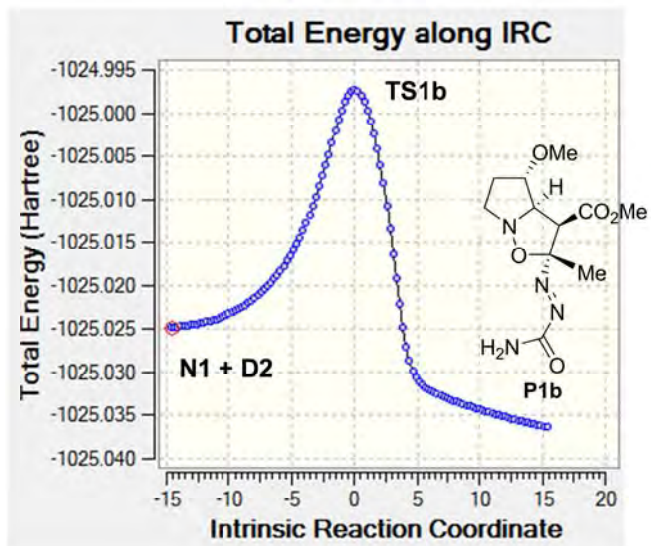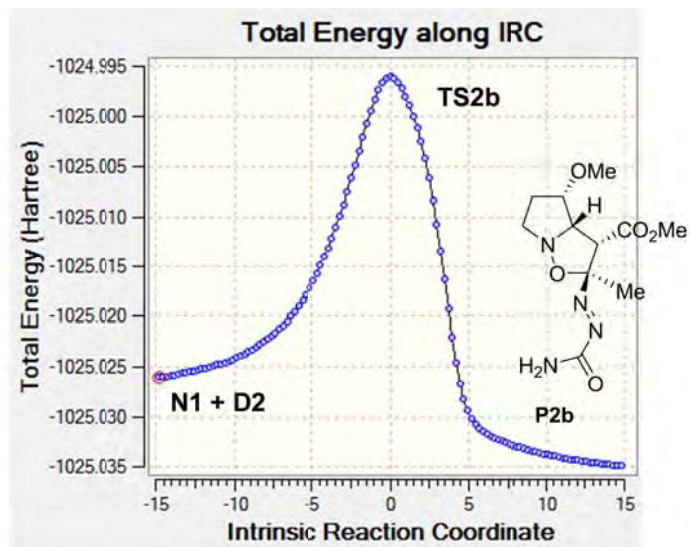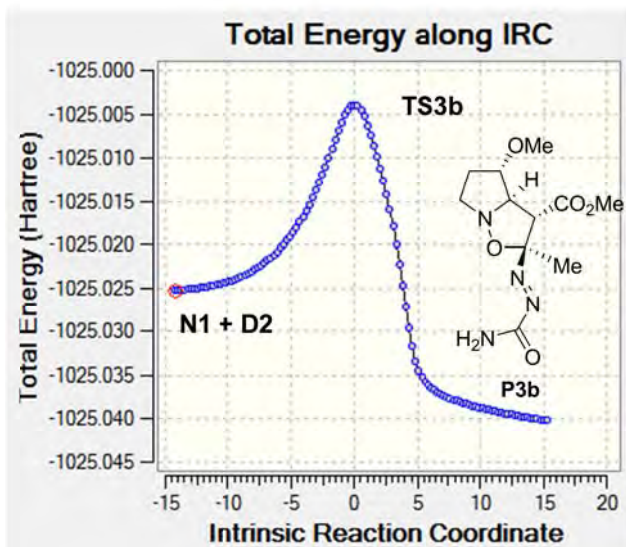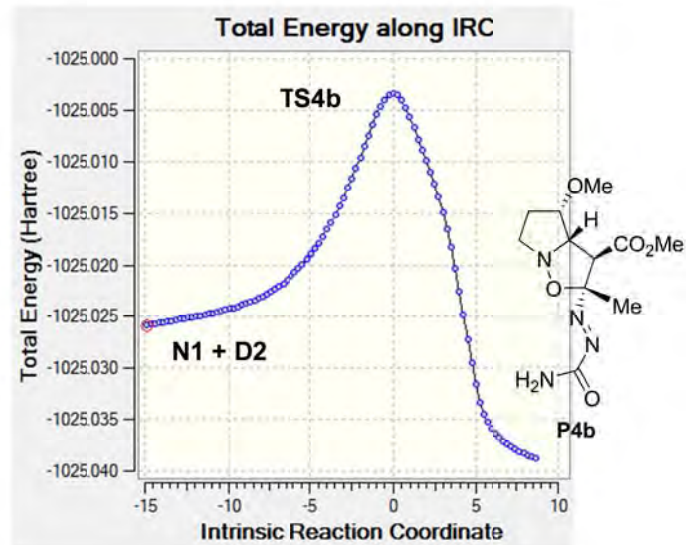

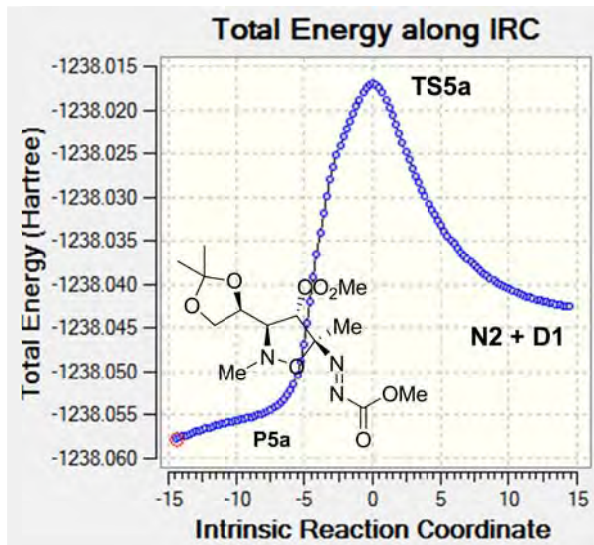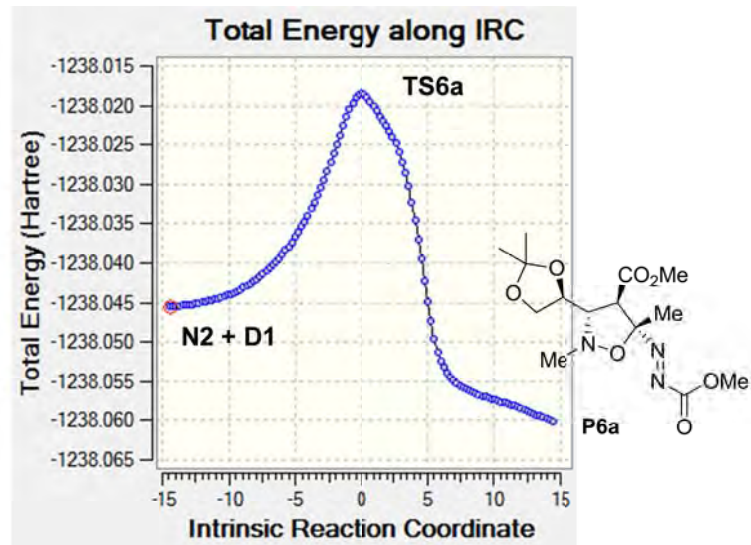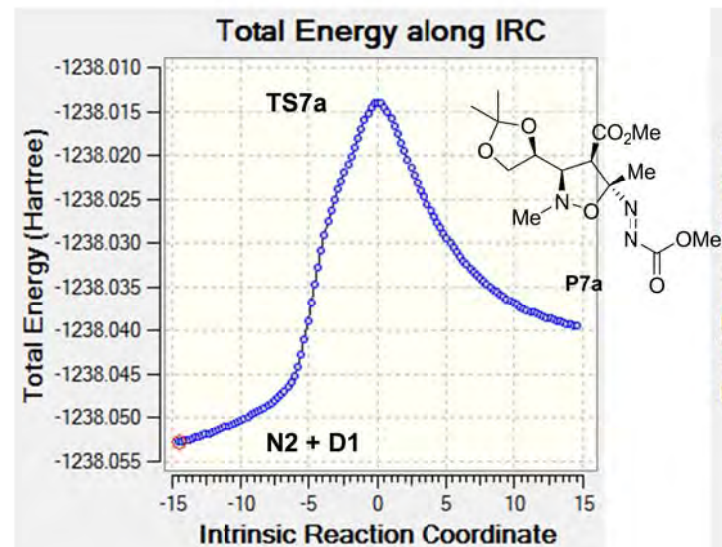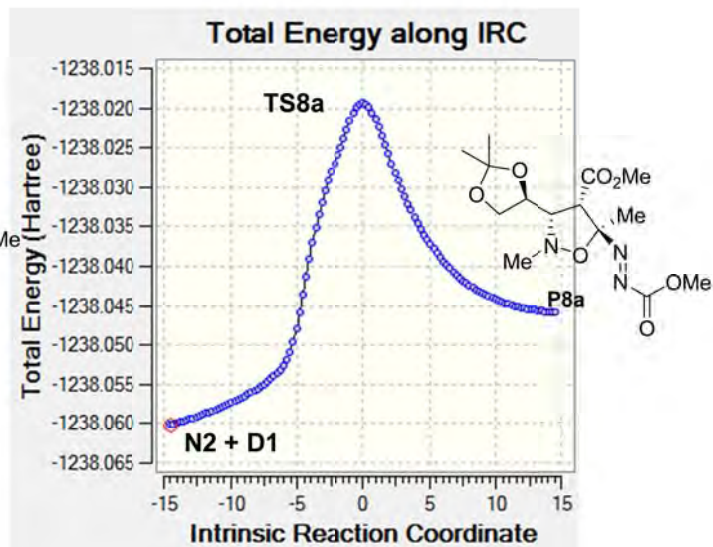

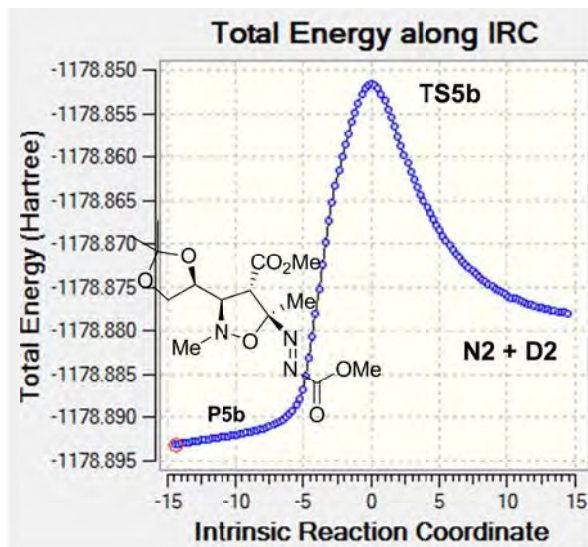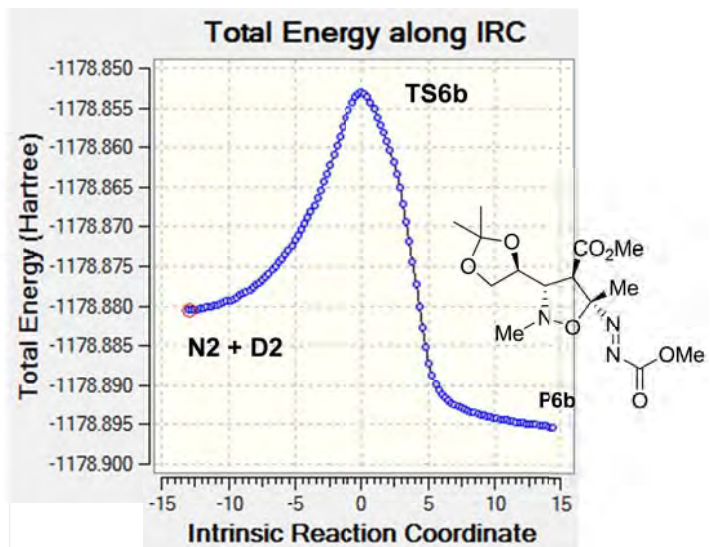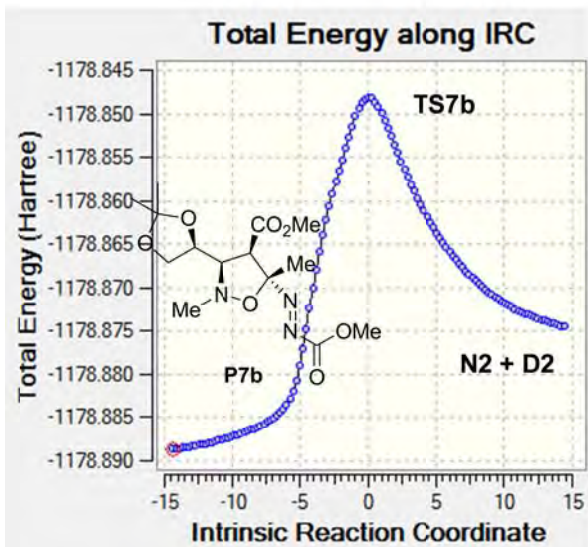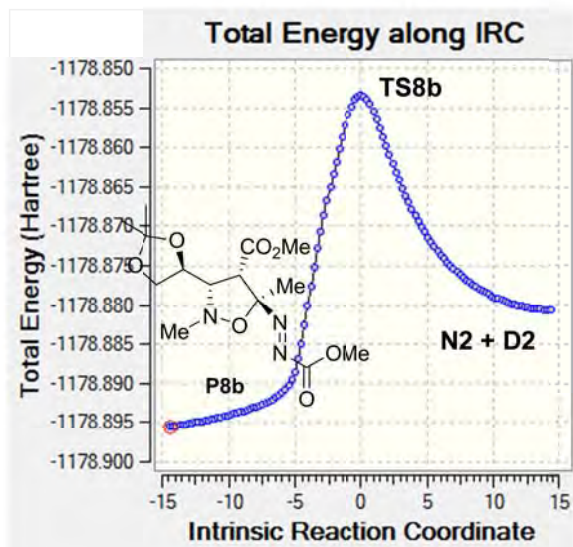

## Calculations of the cycloaddition reaction between nitrone **9a** and DDs **D1** and **D2**

In order to evaluate the validity of the model we have calculated the stationary points corresponding to the reaction of the real nitrone **9a** with diazadienes **D1** and **D2**. Due to the increased size of the molecule we performed the calculations at the 3 $\zeta$  level B3LYP-GD3BJ/6-311G(d,p)/PCM=MeCN. The relative and absolute energy values are collected in Table S9 and the geometry of the transition structures in Figures S4 and S5.

**Table S9.** Absolute ( $\Delta G$ , hartrees) and relative ( $\Delta\Delta G$ , kcal/mol) free energies for the cycloaddition between nitrone **9a** and diazadienes **D1** and **D2** calculated at B3LYP-GD3BJ/6-311G(d,p)/PCM=MeCN levels of theory.

|                 | $\Delta G$   | $\Delta\Delta G^a$ |                 | $\Delta G$   | $\Delta\Delta G^b$ |
|-----------------|--------------|--------------------|-----------------|--------------|--------------------|
| <b>9a</b>       | -632.150612  |                    | <b>9a</b>       | -632.150612  |                    |
| <b>D1</b>       | -683.210346  |                    | <b>D2</b>       | -624.046052  |                    |
| <b>TS1a-OBn</b> | -1315.360958 | 23.2               | <b>TS1b-OBn</b> | -1256.163734 | 20.7               |
| <b>TS2a-OBn</b> | -1315.337006 | 19.0               | <b>TS2b-OBn</b> | -1256.159964 | 23.0               |
| <b>TS3a-OBn</b> | -1315.330711 | 14.2               | <b>TS3b-OBn</b> | -1256.174237 | 14.1               |
| <b>TS4a-OBn</b> | -1315.323990 | 15.0               | <b>TS4b-OBn</b> | -1256.170298 | 16.5               |
| <b>P1a-OBn</b>  | -1315.338356 | 5.2                | <b>P1b-OBn</b>  | -1256.189760 | 4.3                |
| <b>P2a-OBn</b>  | -1315.350610 | 5.4                | <b>P2b-OBn</b>  | -1256.184335 | 7.7                |
| <b>P3a-OBn</b>  | -1315.352697 | 6.5                | <b>P3b-OBn</b>  | -1256.185697 | 6.9                |
| <b>P4a-OBn</b>  | -1315.352325 | -1.5               | <b>P4b-OBn</b>  | -1256.200062 | -2.1               |

<sup>a</sup>Referred to starting materials (**9a+D1**). <sup>b</sup>Referred to starting materials (**9a+D2**).



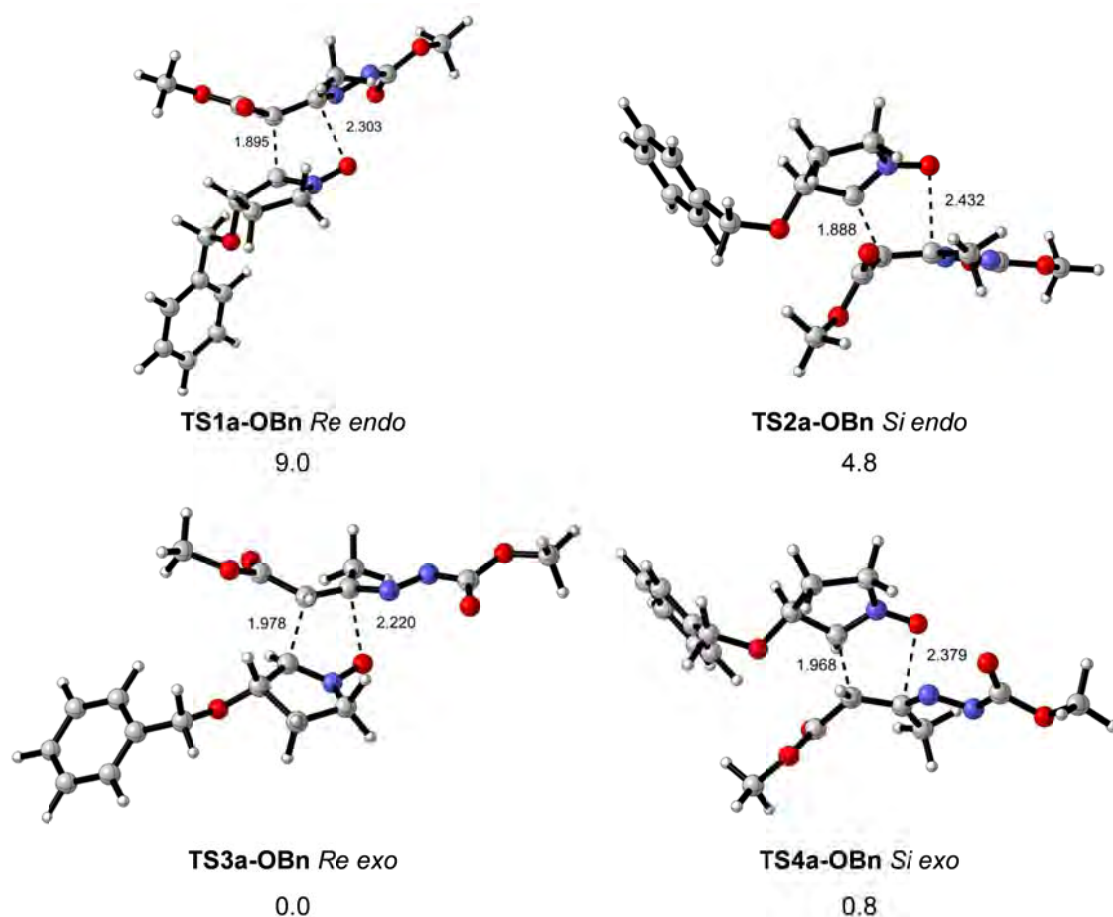

**Figure S4.** Transition structures (PCM=MeCN/ B3LYP-GD3BJ/6-311G(d,p)) corresponding to the reaction between **9a** and **D1**. **TS1a-OBn**, **TS2a-OBn**, **TS3a-OBn** and **TS4a-OBn** correspond to *Re endo*, *Si endo*, *Re exo* and *Si exo* approaches leading to **P1a-OBn**, **P2a-OBn**, **P3a-OBn** and **P4a-OBn**. Relative energy values between TSs referenced to isolated reagents are calculated at PCM=MeCN/ B3LYP-GD3BJ/6-311G(d,p) level on theory and given in kcal/mol. Bond distances are given in Å.

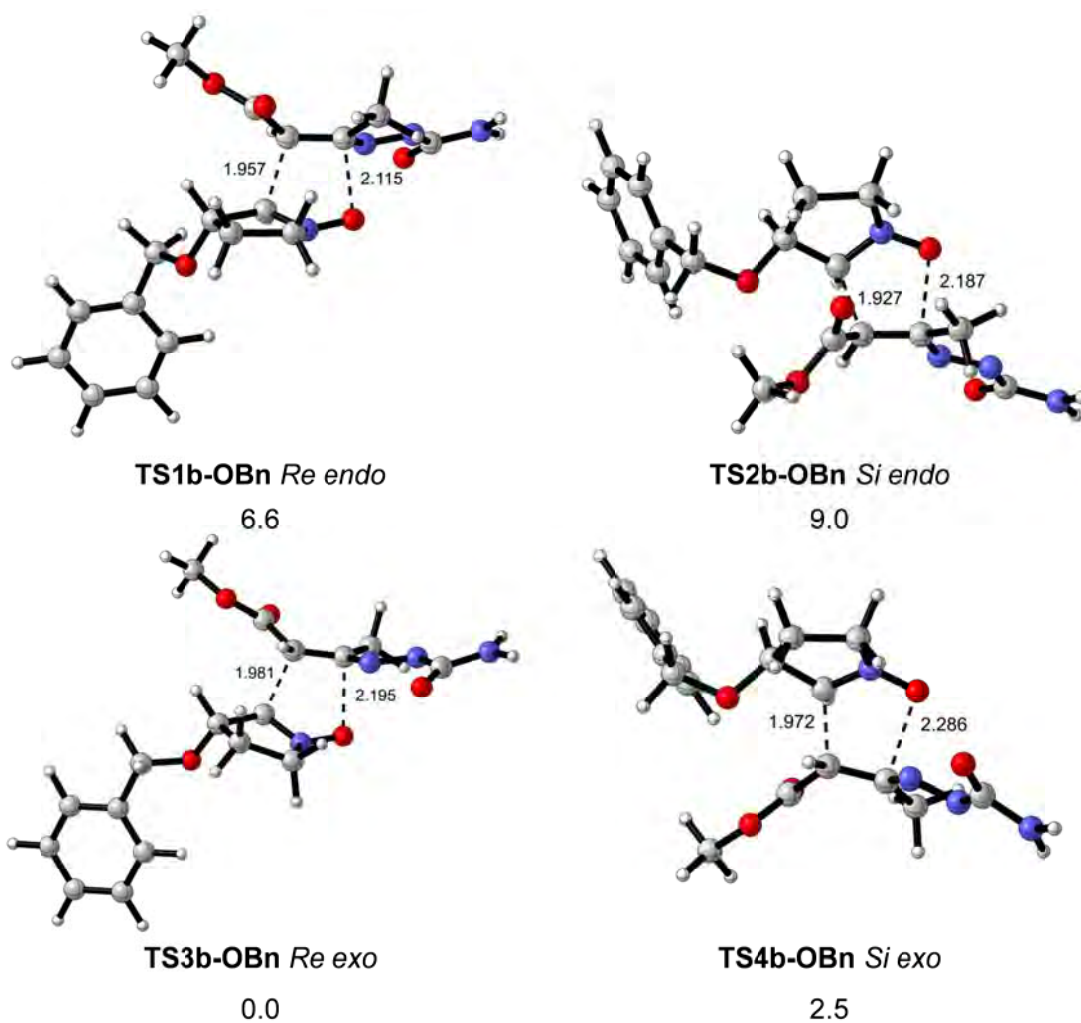

**Figure S5.** Transition structures (PCM=MeCN/ B3LYP-GD3BJ/6-311G(d,p)) corresponding to the reaction between **9a** and **D2**. **TS1b-OBn**, **TS2b-OBn**, **TS3b-OBn** and **TS4b-OBn** correspond to *Re endo*, *Si endo*, *Re exo* and *Si exo* approaches leading to **P1b-OBn**, **P2b-OBn**, **P3b-OBn** and **P4b-OBn**. Relative energy values between TSs referenced to isolated reagents are calculated at PCM=MeCN/ B3LYP-GD3BJ/6-311G(d,p) level on theory and given in kcal/mol. Bond distances are given in Å.

## Cartesian Coordinates

### N1

|   |             |             |             |
|---|-------------|-------------|-------------|
| C | -1.30747400 | 1.19423100  | -0.00025200 |
| C | -0.55217000 | -0.98347700 | 0.20388400  |
| C | 0.67371000  | -0.15546200 | 0.41542700  |
| C | 0.21768800  | 1.25615800  | -0.03260800 |
| H | -1.81412800 | 1.63500300  | -0.85904300 |
| H | -1.74708200 | 1.59249900  | 0.91699500  |
| H | -0.63056900 | -2.06070200 | 0.26111700  |
| H | 0.61508600  | 2.05469500  | 0.59470400  |
| N | -1.60725200 | -0.26356900 | -0.01624800 |
| O | -2.80319400 | -0.64045100 | -0.18787800 |
| H | 0.96842900  | -0.16113500 | 1.47783500  |
| H | 0.57070600  | 1.40252000  | -1.05743000 |
| C | 2.96318700  | -0.04579600 | -0.06683700 |
| H | 3.72899000  | -0.54666800 | -0.66056500 |
| H | 2.94336700  | 1.01879100  | -0.33436900 |
| H | 3.21279700  | -0.13672300 | 0.99915400  |
| O | 1.73238500  | -0.67795200 | -0.35491500 |

### N2

|   |             |             |             |
|---|-------------|-------------|-------------|
| O | -2.59519500 | -1.17300200 | 0.10566900  |
| N | -2.40560000 | 0.08250300  | -0.08288100 |
| C | -3.57146000 | 0.94165000  | 0.16204600  |
| C | -1.26785900 | 0.56386700  | -0.46145600 |
| C | -0.15112600 | -0.40081900 | -0.70553900 |
| O | 1.03852300  | 0.28343400  | -1.05565900 |
| C | 0.23009200  | -1.22734400 | 0.55423700  |
| O | 1.63511500  | -1.06540100 | 0.64062800  |
| C | 1.94262600  | 0.17884700  | 0.04450800  |
| C | 3.35455600  | 0.12786100  | -0.49545900 |
| C | 1.71970400  | 1.32763300  | 1.02282600  |
| H | -3.32358900 | 1.98565800  | -0.02168400 |

|   |             |             |             |
|---|-------------|-------------|-------------|
| H | -3.87421700 | 0.78684100  | 1.19762100  |
| H | -4.36525000 | 0.60490300  | -0.50473700 |
| H | -1.16110400 | 1.62937800  | -0.61805800 |
| H | -0.42898400 | -1.06783300 | -1.53125900 |
| H | -0.27612100 | -0.84709000 | 1.44936200  |
| H | 0.00751500  | -2.28804300 | 0.44278000  |
| H | 3.44803900  | -0.71358200 | -1.18527000 |
| H | 3.58602900  | 1.05641000  | -1.02284300 |
| H | 4.06411900  | 0.00378200  | 0.32614100  |
| H | 1.90111100  | 2.28315900  | 0.52407300  |
| H | 0.69242000  | 1.32482200  | 1.40067200  |
| H | 2.40248700  | 1.23366400  | 1.87128000  |

## **D1**

|   |             |             |             |
|---|-------------|-------------|-------------|
| O | -2.59519500 | -1.17300200 | 0.10566900  |
| N | -2.40560000 | 0.08250300  | -0.08288100 |
| C | -3.57146000 | 0.94165000  | 0.16204600  |
| C | -1.26785900 | 0.56386700  | -0.46145600 |
| C | -0.15112600 | -0.40081900 | -0.70553900 |
| O | 1.03852300  | 0.28343400  | -1.05565900 |
| C | 0.23009200  | -1.22734400 | 0.55423700  |
| O | 1.63511500  | -1.06540100 | 0.64062800  |
| C | 1.94262600  | 0.17884700  | 0.04450800  |
| C | 3.35455600  | 0.12786100  | -0.49545900 |
| C | 1.71970400  | 1.32763300  | 1.02282600  |
| H | -3.32358900 | 1.98565800  | -0.02168400 |
| H | -3.87421700 | 0.78684100  | 1.19762100  |
| H | -4.36525000 | 0.60490300  | -0.50473700 |
| H | -1.16110400 | 1.62937800  | -0.61805800 |
| H | -0.42898400 | -1.06783300 | -1.53125900 |
| H | -0.27612100 | -0.84709000 | 1.44936200  |
| H | 0.00751500  | -2.28804300 | 0.44278000  |
| H | 3.44803900  | -0.71358200 | -1.18527000 |
| H | 3.58602900  | 1.05641000  | -1.02284300 |

|   |            |            |            |
|---|------------|------------|------------|
| H | 4.06411900 | 0.00378200 | 0.32614100 |
| H | 1.90111100 | 2.28315900 | 0.52407300 |
| H | 0.69242000 | 1.32482200 | 1.40067200 |
| H | 2.40248700 | 1.23366400 | 1.87128000 |

**D2**

|   |             |             |             |
|---|-------------|-------------|-------------|
| C | -0.00384100 | 0.40319700  | 0.00002000  |
| C | 1.07289400  | -0.40059400 | 0.00001300  |
| C | -0.04943100 | 1.89681300  | 0.00005800  |
| H | -0.59993700 | 2.24759200  | -0.87800900 |
| H | 0.95487000  | 2.31171600  | 0.00008100  |
| H | -0.59995800 | 2.24754800  | 0.87812900  |
| H | 0.90986700  | -1.47283400 | -0.00001900 |
| C | 2.48890100  | 0.04313400  | 0.00004200  |
| O | 2.89929800  | 1.18351700  | 0.00009800  |
| O | 3.29548000  | -1.02473400 | -0.00000400 |
| N | -1.22618800 | -0.34579000 | -0.00001800 |
| N | -2.24022600 | 0.36816800  | -0.00001600 |
| C | -3.46881500 | -0.45036100 | -0.00005900 |
| O | -3.49636700 | -1.66187300 | -0.00008900 |
| N | -4.52497700 | 0.37691500  | -0.00006100 |
| H | -5.46168200 | 0.00031400  | -0.00008600 |
| H | -4.39170000 | 1.37735100  | -0.00003100 |
| C | 4.69651100  | -0.73486400 | 0.00001300  |
| H | 4.96303300  | -0.16275100 | 0.89073600  |
| H | 5.19762200  | -1.70057200 | -0.00004300 |
| H | 4.96303300  | -0.16264900 | -0.89064500 |

**TS1a**

|   |             |             |             |
|---|-------------|-------------|-------------|
| C | -1.84571600 | -0.65815600 | 2.16979400  |
| C | -1.30476300 | -1.11143900 | -0.06465500 |
| C | -2.81583400 | -1.04373700 | -0.07110800 |
| C | -3.17195000 | -0.73818100 | 1.40481000  |
| H | -1.79766200 | -1.29026400 | 3.05746600  |

|   |             |             |             |
|---|-------------|-------------|-------------|
| H | -1.57384300 | 0.36665600  | 2.43340600  |
| H | -0.72543500 | -1.62516400 | -0.82289100 |
| H | -3.72472000 | 0.19779900  | 1.48849500  |
| C | -0.35290700 | 0.73627200  | -0.49862000 |
| H | -0.13385700 | 0.48025700  | -1.52933000 |
| C | 0.74509000  | 0.68341400  | 0.39242300  |
| N | -0.85546400 | -1.14591500 | 1.19142500  |
| O | 0.40134000  | -0.97615800 | 1.39616600  |
| H | -3.16267000 | -0.25605800 | -0.75513300 |
| H | -3.80140400 | -1.55196000 | 1.76915500  |
| C | -1.47925200 | 1.67243800  | -0.32835800 |
| O | -1.91177500 | 2.11450600  | 0.72000400  |
| O | -2.05287500 | 1.94685700  | -1.51271700 |
| C | -3.20532800 | 2.79303500  | -1.45347200 |
| H | -2.93798600 | 3.76970800  | -1.04571600 |
| H | -3.55372400 | 2.88907600  | -2.47983700 |
| H | -3.97735600 | 2.33978900  | -0.82721100 |
| C | 0.98139600  | 1.62216900  | 1.54465700  |
| H | 1.56833500  | 1.13179600  | 2.32148800  |
| H | 1.55021600  | 2.49042600  | 1.19247400  |
| H | 0.03523600  | 1.96843700  | 1.95533900  |
| N | 1.87502300  | 0.11039700  | -0.27206900 |
| N | 2.95851000  | 0.31962500  | 0.30242400  |
| C | 4.04448600  | -0.33092900 | -0.41003800 |
| O | 3.94815000  | -1.20316600 | -1.23333300 |
| C | -3.40625600 | -2.48390600 | -1.84179100 |
| H | -2.39065100 | -2.53918200 | -2.25410800 |
| H | -3.90952000 | -3.43545500 | -2.01756900 |
| H | -3.95201500 | -1.68202800 | -2.35584400 |
| O | -3.39847900 | -2.27338600 | -0.44297600 |
| O | 5.17918700  | 0.19130900  | 0.03532900  |
| C | 6.36659900  | -0.34639700 | -0.55910600 |
| H | 6.36111000  | -0.16618400 | -1.63563400 |
| H | 7.19497600  | 0.17574500  | -0.08582300 |

H 6.42670700 -1.41934200 -0.36818000

**TS2a**

C 1.72077500 -2.06405600 1.31856700  
C 1.11485400 -1.21791800 -0.79036500  
C 2.61725900 -1.32986700 -0.86199800  
C 3.02821600 -1.74454500 0.57768400  
H 1.65375000 -3.09474000 1.67140400  
H 1.51777500 -1.38119600 2.14678200  
H 0.48741200 -1.23599800 -1.67334900  
H 3.52225100 -0.89231300 1.04880100  
C 0.36055100 0.64730500 -0.20907800  
H 0.11993200 0.97680800 -1.21413300  
C -0.74750900 0.25028600 0.57970700  
N 0.67762800 -1.85775600 0.29614700  
O -0.55494700 -1.72689400 0.62367500  
H 3.71030900 -2.59543700 0.57246000  
C 1.52370900 1.33435300 0.39630300  
O 2.05895300 1.04031400 1.44861800  
O 1.94063200 2.34966700 -0.36985300  
C 3.15787000 2.96324900 0.05198000  
H 3.03370200 3.43245000 1.03014200  
H 3.39088800 3.71254000 -0.70266400  
H 3.95031100 2.21264300 0.10826000  
C -0.89395800 0.49668900 2.05691000  
H -1.55693200 -0.24546100 2.50177500  
H -1.33819100 1.48534400 2.22197800  
H 0.07892300 0.46381800 2.54443200  
N -1.91876700 0.16603400 -0.23010200  
N -2.98432900 0.16737700 0.41478600  
C -4.11857100 0.02253800 -0.47647200  
O -4.10498200 -0.41576400 -1.59735900  
H 2.89056100 -2.10830200 -1.59099900  
C 4.53476200 -0.18783100 -1.57808800

|   |             |             |             |
|---|-------------|-------------|-------------|
| H | 4.84690700  | 0.79158300  | -1.94334900 |
| H | 5.12009200  | -0.44156700 | -0.68503200 |
| H | 4.72334500  | -0.94280800 | -2.35276000 |
| O | 3.15394000  | -0.10004400 | -1.28613800 |
| O | -5.19701300 | 0.42699600  | 0.18215200  |
| C | -6.42466200 | 0.33071600  | -0.54937000 |
| H | -7.19517600 | 0.70997300  | 0.11804000  |
| H | -6.36923700 | 0.93349200  | -1.45760800 |
| H | -6.62079000 | -0.71013800 | -0.81342900 |

**TS3a**

|   |             |             |             |
|---|-------------|-------------|-------------|
| C | -0.34234900 | -2.35303200 | 0.18530400  |
| C | -1.66480800 | -0.53148200 | 0.78048900  |
| C | -2.51615700 | -1.29112700 | -0.20170600 |
| C | -1.72811100 | -2.61649000 | -0.40592300 |
| H | 0.09644300  | -3.19373500 | 0.72331200  |
| H | 0.38541700  | -1.97223700 | -0.54239800 |
| H | -2.06748600 | 0.18727000  | 1.48681600  |
| H | -1.67630100 | -2.92335700 | -1.45074200 |
| C | -0.48103900 | 0.91296900  | -0.22920500 |
| C | 0.68864100  | 0.91597800  | 0.55283100  |
| N | -0.60288500 | -1.25612900 | 1.13521200  |
| O | 0.36237500  | -0.69119700 | 1.75113000  |
| H | -0.40786900 | 0.40763600  | -1.18832800 |
| H | -2.24234600 | -3.39437800 | 0.16565100  |
| C | -1.49305800 | 1.98727300  | -0.17716200 |
| O | -1.67890000 | 2.77052800  | 0.73086500  |
| O | -2.26157000 | 1.95426700  | -1.27960000 |
| C | -3.32527600 | 2.91027400  | -1.31253000 |
| H | -3.82879900 | 2.75834000  | -2.26509900 |
| H | -2.92549500 | 3.92388800  | -1.24768200 |
| H | -4.01363100 | 2.73866800  | -0.48244800 |
| C | 0.98577000  | 1.88593300  | 1.65485100  |
| H | 1.35031400  | 2.83347200  | 1.24350300  |



|   |             |             |             |
|---|-------------|-------------|-------------|
| H | 1.75775500  | 1.47422900  | 2.30609700  |
| H | 0.08065600  | 2.08343400  | 2.22632000  |
| N | 1.74041200  | 0.23489500  | -0.11434000 |
| N | 2.88666100  | 0.50388600  | 0.30143100  |
| C | 3.87150900  | -0.27712300 | -0.41138200 |
| O | 3.67602700  | -1.28531100 | -1.04142500 |
| H | -2.59881800 | -0.72177400 | -1.13989400 |
| C | -4.71024900 | -2.00535100 | -0.59465400 |
| H | -4.40807600 | -3.00582900 | -0.93004900 |
| H | -5.67951300 | -2.07333700 | -0.09959700 |
| H | -4.79284700 | -1.34818800 | -1.47078200 |
| O | -3.79789700 | -1.47568800 | 0.34771100  |
| O | 5.05577900  | 0.29070900  | -0.21596100 |
| C | 6.15781500  | -0.38000300 | -0.83758100 |
| H | 6.01640000  | -0.41194900 | -1.91950900 |
| H | 7.03973700  | 0.20309700  | -0.58234600 |
| H | 6.24249600  | -1.39720100 | -0.45070200 |

#### **TS4a**

|   |             |             |             |
|---|-------------|-------------|-------------|
| C | -0.13621000 | -2.57404600 | 0.44391400  |
| C | -1.55637100 | -0.82208000 | 1.10585800  |
| C | -2.43160600 | -1.70074000 | 0.25267200  |
| C | -1.41387700 | -2.66862900 | -0.40731500 |
| H | 0.06779900  | -3.46943800 | 1.03430800  |
| H | 0.76222100  | -2.30067400 | -0.11902300 |
| H | -1.94206200 | -0.13452300 | 1.85189000  |
| H | -1.22059000 | -2.30756700 | -1.42162900 |
| C | -0.71243900 | 0.64761400  | -0.03078500 |
| C | 0.52046900  | 0.88017000  | 0.60890100  |
| N | -0.40931800 | -1.45452600 | 1.36563400  |
| O | 0.53716000  | -0.82118800 | 1.91988400  |
| H | -0.64890400 | 0.13923600  | -0.98885800 |
| H | -1.78958300 | -3.69008200 | -0.47132800 |
| C | -1.82248800 | 1.64093400  | 0.04724900  |

|   |             |             |             |
|---|-------------|-------------|-------------|
| O | -2.29858600 | 2.09049600  | 1.06906700  |
| O | -2.24906800 | 1.97715800  | -1.17201900 |
| C | -3.38180300 | 2.85023800  | -1.20296500 |
| H | -3.59468300 | 3.02106600  | -2.25625700 |
| H | -3.15262100 | 3.79117600  | -0.69954600 |
| H | -4.23194600 | 2.37207000  | -0.71149900 |
| C | 0.76507600  | 1.92393700  | 1.65399500  |
| H | 1.13106900  | 2.84869700  | 1.19360600  |
| H | 1.52823900  | 1.57488200  | 2.35192300  |
| H | -0.15767500 | 2.13745400  | 2.19298900  |
| N | 1.58519400  | 0.28139500  | -0.08101000 |
| N | 2.72613000  | 0.69987900  | 0.23524400  |
| C | 3.73442200  | -0.02729600 | -0.48352100 |
| O | 3.61259700  | -1.09743000 | -1.02853300 |
| H | -3.15165300 | -2.24573000 | 0.88240400  |
| C | -4.11001700 | -1.60048000 | -1.38502700 |
| H | -4.59694200 | -0.88452800 | -2.04805700 |
| H | -3.66141200 | -2.40049400 | -1.98723500 |
| H | -4.85502200 | -2.03888000 | -0.70845900 |
| O | -3.12750100 | -0.88699100 | -0.65886600 |
| O | 4.86735300  | 0.66778800  | -0.41424300 |
| C | 5.98808100  | 0.06434300  | -1.06730300 |
| H | 5.77691200  | -0.07260600 | -2.12968700 |
| H | 6.81775900  | 0.75396000  | -0.92711300 |
| H | 6.20999600  | -0.90370500 | -0.61386500 |

### TS1b

|   |             |             |             |
|---|-------------|-------------|-------------|
| C | -1.42717400 | -0.70576000 | 2.17900300  |
| C | -1.00572400 | -1.11420800 | -0.08889200 |
| C | -2.51186800 | -1.00325600 | -0.02216800 |
| C | -2.79018900 | -0.73609100 | 1.47753100  |
| H | -1.35054800 | -1.36577000 | 3.04423800  |
| H | -1.12114700 | 0.30476000  | 2.45896600  |
| H | -0.47205200 | -1.61004300 | -0.89088100 |

|   |             |             |             |
|---|-------------|-------------|-------------|
| H | -3.31839800 | 0.20752800  | 1.61612100  |
| C | -0.00654500 | 0.74164100  | -0.52418200 |
| H | 0.15663200  | 0.50536600  | -1.56966500 |
| C | 1.12042300  | 0.61646600  | 0.31990000  |
| N | -0.49652200 | -1.18356800 | 1.13916600  |
| O | 0.77484300  | -1.04086300 | 1.28602600  |
| H | -2.86416200 | -0.18277700 | -0.66363700 |
| H | -3.41807200 | -1.54842800 | 1.84783400  |
| C | -1.10390600 | 1.68728200  | -0.26918800 |
| O | -1.47652800 | 2.10651000  | 0.81203100  |
| O | -1.73671300 | 2.00507300  | -1.41404900 |
| C | -2.86949200 | 2.86557300  | -1.26751800 |
| H | -2.56292100 | 3.83013800  | -0.85814700 |
| H | -3.27891200 | 2.98835100  | -2.26822400 |
| H | -3.60931500 | 2.41207500  | -0.60377900 |
| C | 1.43375100  | 1.51363700  | 1.48711300  |
| H | 2.06864800  | 0.99452200  | 2.20511300  |
| H | 1.97985300  | 2.39467100  | 1.13062600  |
| H | 0.51648900  | 1.84471600  | 1.96966300  |
| N | 2.21053400  | 0.03853600  | -0.41769300 |
| N | 3.31943100  | 0.20228900  | 0.11135200  |
| C | 4.38537400  | -0.43352300 | -0.68156100 |
| O | 4.22710800  | -0.99585200 | -1.74491500 |
| N | 5.54930700  | -0.27595200 | -0.03055100 |
| H | 6.40095000  | -0.65444100 | -0.41843500 |
| H | 5.57767100  | 0.20529500  | 0.85602000  |
| C | -3.23868800 | -2.35669400 | -1.80965300 |
| H | -2.24854100 | -2.41479400 | -2.27952800 |
| H | -3.77120600 | -3.29062800 | -1.99381300 |
| H | -3.79463100 | -1.52470000 | -2.26143300 |
| O | -3.14938000 | -2.20178900 | -0.40650000 |

**TS2b**

|   |            |             |            |
|---|------------|-------------|------------|
| C | 1.27781300 | -2.11828800 | 1.26781700 |
|---|------------|-------------|------------|

|   |             |             |             |
|---|-------------|-------------|-------------|
| C | 0.78832100  | -1.20281200 | -0.84052800 |
| C | 2.28882100  | -1.34697100 | -0.84792800 |
| C | 2.62395100  | -1.79904500 | 0.59973500  |
| H | 1.17586300  | -3.16037700 | 1.57649400  |
| H | 1.05040500  | -1.46433200 | 2.11268900  |
| H | 0.19696200  | -1.16716600 | -1.74731900 |
| H | 3.10245900  | -0.96230200 | 1.11284100  |
| C | 0.03274600  | 0.68707600  | -0.22506500 |
| H | -0.15967100 | 1.04911300  | -1.22909900 |
| C | -1.10733200 | 0.26845400  | 0.50180700  |
| N | 0.28688100  | -1.85094500 | 0.20853500  |
| O | -0.95665000 | -1.68726600 | 0.48986200  |
| H | 3.29656400  | -2.65741400 | 0.60948300  |
| C | 1.18807600  | 1.31730400  | 0.44446800  |
| O | 1.66738100  | 0.98289700  | 1.51278100  |
| O | 1.67712800  | 2.33317700  | -0.27984700 |
| C | 2.89581600  | 2.88967800  | 0.20924600  |
| H | 2.74556000  | 3.34677700  | 1.18962900  |
| H | 3.19416000  | 3.64219500  | -0.51900000 |
| H | 3.65549200  | 2.10789700  | 0.28792500  |
| C | -1.30925200 | 0.47026900  | 1.97979700  |
| H | -2.00827500 | -0.26863400 | 2.37131800  |
| H | -1.73552500 | 1.46423900  | 2.15937300  |
| H | -0.35799200 | 0.39700800  | 2.50412400  |
| N | -2.25421100 | 0.24969100  | -0.35857800 |
| N | -3.33930900 | 0.25103200  | 0.24293700  |
| H | 2.57913300  | -2.11598700 | -1.58070300 |
| C | 4.26136900  | -0.23099600 | -1.44473200 |
| H | 4.61045900  | 0.74782800  | -1.77676900 |
| H | 4.79605600  | -0.51120100 | -0.52801600 |
| H | 4.47446200  | -0.97673400 | -2.22218900 |
| O | 2.86969400  | -0.12039500 | -1.22077500 |
| C | -4.46885800 | 0.20447100  | -0.69899200 |
| O | -4.37557500 | 0.20879400  | -1.90898100 |

|   |             |            |             |
|---|-------------|------------|-------------|
| N | -5.61001400 | 0.16190700 | 0.00872600  |
| H | -6.49882200 | 0.11797700 | -0.46763400 |
| H | -5.58537500 | 0.15681900 | 1.01745700  |

**TS3b**

|   |             |             |             |
|---|-------------|-------------|-------------|
| C | -0.10417700 | -2.35851600 | 0.14607900  |
| C | -1.36328600 | -0.47143900 | 0.74897700  |
| C | -2.25624100 | -1.21661600 | -0.20267700 |
| C | -1.29207200 | -2.26049600 | -0.82358400 |
| H | -0.07537000 | -3.28361600 | 0.72503800  |
| H | 0.86750600  | -2.19552900 | -0.32935500 |
| H | -1.73042500 | 0.24281800  | 1.47885500  |
| H | -0.95102400 | -1.91855600 | -1.80292000 |
| C | -0.16714400 | 0.95758900  | -0.26645300 |
| C | 1.03243100  | 0.88488700  | 0.46719000  |
| N | -0.31870600 | -1.22990000 | 1.07415000  |
| O | 0.66638800  | -0.69139800 | 1.68584200  |
| H | -0.15676800 | 0.47553500  | -1.23987500 |
| H | -1.79843300 | -3.21792100 | -0.95759400 |
| C | -1.11576300 | 2.08217000  | -0.14720000 |
| O | -1.24876100 | 2.82430500  | 0.80423400  |
| O | -1.89510100 | 2.15604300  | -1.24046400 |
| C | -2.89631600 | 3.17659400  | -1.20933100 |
| H | -3.41808500 | 3.10722700  | -2.16178800 |
| H | -2.43348800 | 4.15869100  | -1.09642100 |
| H | -3.58656300 | 3.00526300  | -0.38068000 |
| C | 1.44517200  | 1.83665800  | 1.54803200  |
| H | 1.84994600  | 2.75799700  | 1.11502300  |
| H | 2.22219000  | 1.37651600  | 2.15997800  |
| H | 0.58509500  | 2.09230200  | 2.16425800  |
| N | 2.00811400  | 0.12920900  | -0.24234000 |
| N | 3.18705500  | 0.33565300  | 0.09736900  |
| C | 4.09782400  | -0.53400000 | -0.64895700 |
| O | 3.76145600  | -1.50586200 | -1.29718800 |

|   |             |             |             |
|---|-------------|-------------|-------------|
| N | 5.35833400  | -0.10107300 | -0.47420500 |
| H | 6.12470100  | -0.58688400 | -0.91609800 |
| H | 5.54624300  | 0.71076700  | 0.09489400  |
| H | -2.67508900 | -0.54060200 | -0.96098800 |
| C | -4.36984800 | -2.24789600 | -0.24640600 |
| H | -4.04920600 | -3.02079500 | -0.95653700 |
| H | -5.11520800 | -2.67194400 | 0.42741100  |
| H | -4.81673000 | -1.41662900 | -0.80747700 |
| O | -3.29602500 | -1.79627200 | 0.55575500  |

**TS4b**

|   |             |             |             |
|---|-------------|-------------|-------------|
| C | 0.22322300  | -2.53551600 | 0.46288800  |
| C | -1.19518400 | -0.79856200 | 1.15059100  |
| C | -2.09478500 | -1.71446600 | 0.36709800  |
| C | -1.08967000 | -2.66859400 | -0.32860300 |
| H | 0.46246900  | -3.41384500 | 1.06556600  |
| H | 1.09069900  | -2.26774300 | -0.14835900 |
| H | -1.55034300 | -0.07399300 | 1.87611300  |
| H | -0.95032400 | -2.31276000 | -1.35370700 |
| C | -0.39144800 | 0.67826700  | -0.09474500 |
| C | 0.87747100  | 0.87275800  | 0.48091600  |
| N | -0.02539600 | -1.39418300 | 1.36564600  |
| O | 0.94323000  | -0.70368100 | 1.82565900  |
| H | -0.40276800 | 0.14628400  | -1.04150400 |
| H | -1.44520800 | -3.69869500 | -0.36640900 |
| C | -1.47991100 | 1.67666000  | 0.05356500  |
| O | -1.84586100 | 2.18067300  | 1.09696600  |
| O | -2.04658600 | 1.95160900  | -1.12649700 |
| C | -3.17430800 | 2.82832600  | -1.07174300 |
| H | -3.51926200 | 2.93177500  | -2.09874800 |
| H | -2.88489900 | 3.79919100  | -0.66493100 |
| H | -3.95688000 | 2.39226100  | -0.44673900 |
| C | 1.22105400  | 1.95619600  | 1.45656800  |
| H | 1.54280300  | 2.85947600  | 0.92609600  |

|   |             |             |             |
|---|-------------|-------------|-------------|
| H | 2.04474400  | 1.63110700  | 2.09430600  |
| H | 0.35202600  | 2.19510500  | 2.06835500  |
| N | 1.89175400  | 0.24030300  | -0.28117600 |
| N | 3.04704300  | 0.65943500  | -0.07127100 |
| C | 4.01966500  | -0.09516600 | -0.85752600 |
| O | 3.79749200  | -1.14712600 | -1.42583200 |
| N | 5.20250400  | 0.54458700  | -0.82429800 |
| H | 5.99704200  | 0.16267400  | -1.31535400 |
| H | 5.30074300  | 1.41095800  | -0.31655900 |
| H | -2.76362900 | -2.26461600 | 1.04758800  |
| C | -3.85647700 | -1.69348900 | -1.18251100 |
| H | -4.41141300 | -1.00105100 | -1.81667400 |
| H | -3.41266500 | -2.47729400 | -1.80930300 |
| H | -4.54279200 | -2.15939700 | -0.46321400 |
| O | -2.86320800 | -0.93758900 | -0.51752300 |

### **TS5a**

|   |             |             |             |
|---|-------------|-------------|-------------|
| C | -0.03045400 | -1.47440400 | -0.55706600 |
| C | 1.18072000  | -1.50337800 | 0.16210700  |
| C | -0.94808700 | -2.62295300 | -0.68457800 |
| O | -1.02933900 | -3.58513100 | 0.05383600  |
| O | -1.76517800 | -2.44951600 | -1.73739200 |
| C | -2.74755800 | -3.47189900 | -1.92638200 |
| H | -0.04890200 | -0.79599300 | -1.40231600 |
| H | -3.40336000 | -3.53190500 | -1.05533800 |
| H | -2.26472700 | -4.43835100 | -2.08204900 |
| H | -3.31162000 | -3.17965900 | -2.80975200 |
| C | -1.24089600 | -0.25157300 | 0.73813100  |
| O | -1.56445100 | 2.10619200  | 0.84062500  |
| C | -1.49472900 | 1.22636600  | -1.32554700 |
| C | -2.54657900 | 2.72984200  | 0.01186500  |
| O | -2.10053500 | 2.50186900  | -1.31162200 |
| C | -2.53128300 | 4.21932500  | 0.27955500  |
| C | -3.91447400 | 2.09950600  | 0.24669100  |

|   |             |             |             |
|---|-------------|-------------|-------------|
| C | -0.91676200 | 1.07882100  | 0.09979200  |
| O | 0.69542700  | -0.46959700 | 1.81324300  |
| N | -0.58270000 | -0.63008500 | 1.83501900  |
| C | -1.07974100 | -1.70668000 | 2.69454800  |
| H | -2.28351000 | -0.56388800 | 0.70304500  |
| H | -2.22125200 | 0.43148700  | -1.54844200 |
| H | -0.72391600 | 1.22563600  | -2.09834400 |
| H | -3.23869700 | 4.72389600  | -0.38309300 |
| H | -1.52666000 | 4.60867100  | 0.10182000  |
| H | -2.81793300 | 4.41483500  | 1.31560800  |
| H | -4.66621000 | 2.59686500  | -0.37172200 |
| H | -4.19515500 | 2.19959300  | 1.29803500  |
| H | -3.90539200 | 1.03602100  | -0.00963900 |
| H | 0.16227600  | 1.24856900  | 0.13234400  |
| H | -0.64344000 | -1.56282700 | 3.68217300  |
| H | -0.77296200 | -2.66938900 | 2.27919600  |
| H | -2.16640200 | -1.64897200 | 2.75056000  |
| C | 1.79626200  | -2.71222400 | 0.81104100  |
| H | 1.02633100  | -3.42529100 | 1.09858400  |
| H | 2.47176400  | -3.19640300 | 0.09614200  |
| H | 2.38431400  | -2.42255200 | 1.68202600  |
| C | 4.04038400  | 0.53071500  | -0.36680400 |
| O | 5.14699800  | 0.33498700  | -0.80052400 |
| O | 3.47437000  | 1.71535200  | -0.18443600 |
| C | 4.28740500  | 2.83574500  | -0.56300600 |
| H | 3.70243700  | 3.71849000  | -0.31572400 |
| H | 5.22376900  | 2.82206200  | -0.00264100 |
| H | 4.49899700  | 2.79828300  | -1.63277700 |
| N | 2.03988400  | -0.45061600 | -0.28857700 |
| N | 3.21948200  | -0.56010900 | 0.09075600  |

**TS6a**

|   |            |            |             |
|---|------------|------------|-------------|
| C | 1.28997900 | 0.52795500 | 1.07067600  |
| O | 0.25183200 | 2.10115800 | -0.37978700 |



|   |             |             |             |
|---|-------------|-------------|-------------|
| C | -0.27611600 | 2.39154400  | 1.81135200  |
| C | -0.68775900 | 3.17226200  | -0.32241000 |
| O | -1.06348700 | 3.29275200  | 1.05300800  |
| C | -1.92849500 | 2.82655100  | -1.12959100 |
| C | 0.01079900  | 4.43444000  | -0.78824400 |
| C | 0.04085200  | 1.31183300  | 0.77865200  |
| O | 0.18841600  | -1.24606900 | 1.82559200  |
| N | 1.20528800  | -0.46678500 | 1.96265300  |
| C | 2.39869100  | -1.06860500 | 2.55918900  |
| H | 2.21969200  | 1.09388900  | 1.07416200  |
| H | 0.64408800  | 2.87140300  | 2.17278000  |
| H | -0.86010200 | 2.02662800  | 2.65823400  |
| H | -2.69524400 | 3.59178300  | -0.98362400 |
| H | -2.32525900 | 1.85976100  | -0.80427300 |
| H | -1.68081400 | 2.77120600  | -2.19284700 |
| H | -0.68185900 | 5.27887500  | -0.75041800 |
| H | 0.36483800  | 4.31307400  | -1.81528700 |
| H | 0.86455200  | 4.63954700  | -0.13721400 |
| H | -0.81318200 | 0.63841300  | 0.65065400  |
| H | 2.10673400  | -1.49079800 | 3.52019100  |
| H | 3.15834300  | -0.30058700 | 2.70117300  |
| H | 2.77201300  | -1.85221900 | 1.89606300  |
| C | 1.23521500  | -0.73714400 | -0.60337000 |
| C | 0.41529400  | -1.78489300 | -0.13353600 |
| C | 2.67888900  | -0.89536600 | -0.88497900 |
| O | 3.43666000  | -1.71401100 | -0.40166400 |
| O | 3.09051000  | 0.04561600  | -1.74846400 |
| C | 4.48635600  | 0.02459000  | -2.05839700 |
| H | 4.76236200  | -0.93399600 | -2.50196100 |
| H | 5.07748800  | 0.18782400  | -1.15475700 |
| H | 4.64329200  | 0.83341700  | -2.76920600 |
| C | -3.10234500 | -2.06668200 | -0.50673900 |
| O | -3.86987400 | -2.85726200 | -0.99471300 |
| O | -3.40768300 | -0.83722300 | -0.10978500 |

|   |             |             |             |
|---|-------------|-------------|-------------|
| C | -4.77589300 | -0.46025800 | -0.31716300 |
| H | -5.43747300 | -1.15781000 | 0.19951000  |
| H | -4.87051000 | 0.54052600  | 0.09843600  |
| H | -5.00522000 | -0.45886200 | -1.38407700 |
| N | -0.95130100 | -1.48794100 | -0.41362000 |
| N | -1.73672300 | -2.43809700 | -0.23685100 |
| H | 0.74323400  | 0.00768600  | -1.21970600 |
| C | 0.82121200  | -3.21782900 | 0.07131500  |
| H | 0.62086900  | -3.78217300 | -0.84731100 |
| H | 1.88315000  | -3.28807100 | 0.29697200  |
| H | 0.23710000  | -3.66982200 | 0.87320300  |

**TS7a**

|   |             |             |             |
|---|-------------|-------------|-------------|
| C | -0.41662200 | 1.01642300  | 0.72540100  |
| C | -1.22576900 | 0.79583600  | -0.40748300 |
| C | 0.53208400  | 2.13559800  | 0.91185900  |
| O | 1.00372800  | 2.42669800  | 1.99241600  |
| O | 0.82530900  | 2.81128200  | -0.20999200 |
| C | 1.62906400  | 3.98271700  | -0.03003200 |
| H | -0.85967400 | 0.72594600  | 1.67346100  |
| H | 1.76759100  | 4.39897400  | -1.02556000 |
| H | 2.59225100  | 3.72891100  | 0.41723100  |
| H | 1.11144800  | 4.69421500  | 0.61622300  |
| C | 0.88501200  | -0.72163500 | 0.64745600  |
| O | 2.66736500  | -1.36876300 | -0.79991600 |
| C | 3.07993800  | 0.56921200  | 0.44468700  |
| C | 4.00613600  | -1.36541300 | -0.30345800 |
| O | 4.28190000  | -0.00702300 | -0.02261000 |
| C | 4.93141800  | -1.82967500 | -1.40742000 |
| C | 4.10528400  | -2.22038800 | 0.95418300  |
| C | 1.97795500  | -0.23714500 | -0.28262900 |
| O | -0.61953200 | -1.06627200 | -0.95602400 |
| N | -0.09381200 | -1.47209900 | 0.14359100  |
| C | -0.95222800 | -2.29602700 | 0.99308000  |

|   |             |             |             |
|---|-------------|-------------|-------------|
| H | 1.17742000  | -0.98033900 | 1.66302400  |
| H | 2.98881400  | 0.48839600  | 1.53602500  |
| H | 3.08277700  | 1.62335400  | 0.16871600  |
| H | 5.96868700  | -1.78699400 | -1.06644200 |
| H | 4.80826100  | -1.18167600 | -2.27771600 |
| H | 4.69397700  | -2.85948500 | -1.68451600 |
| H | 5.13214400  | -2.21678300 | 1.32879500  |
| H | 3.81173600  | -3.24870100 | 0.72913000  |
| H | 3.44774700  | -1.83746100 | 1.74017500  |
| H | 1.55084800  | 0.31084000  | -1.12486400 |
| H | -1.25550900 | -3.16681000 | 0.41182600  |
| H | -1.83605600 | -1.70691900 | 1.25773300  |
| H | -0.40072800 | -2.60698600 | 1.87910000  |
| C | -4.65728200 | -0.11870200 | -0.39577400 |
| O | -5.70116700 | 0.36235400  | -0.76010700 |
| O | -4.53359300 | -1.18997400 | 0.37944500  |
| C | -5.77271000 | -1.77437800 | 0.80106600  |
| H | -6.36216000 | -2.06928900 | -0.06874200 |
| H | -5.49988500 | -2.64417600 | 1.39447100  |
| H | -6.33890100 | -1.05987200 | 1.40113100  |
| N | -3.40475100 | 0.42003900  | -0.85268300 |
| N | -2.49393500 | 0.27956100  | -0.01136400 |
| C | -1.09218000 | 1.43857900  | -1.75577300 |
| H | -1.54685000 | 2.43477000  | -1.74999900 |
| H | -0.04632000 | 1.54186400  | -2.03691000 |
| H | -1.61281400 | 0.82929400  | -2.49577100 |

**TS8a**

|   |            |             |             |
|---|------------|-------------|-------------|
| C | 0.65059000 | -0.95300500 | -0.79874900 |
| O | 2.84332100 | -0.18471400 | -0.38160200 |
| C | 2.41143700 | -2.22743400 | 0.51943200  |
| C | 4.02628300 | -0.59036700 | 0.30492800  |
| O | 3.70320000 | -1.83043200 | 0.94104100  |
| C | 4.38558400 | 0.41859700  | 1.38217900  |

|   |             |             |             |
|---|-------------|-------------|-------------|
| C | 5.11767900  | -0.79431200 | -0.72749800 |
| C | 1.76149800  | -0.87905500 | 0.21086900  |
| O | -0.92394500 | -1.40143100 | 0.69989600  |
| N | -0.45009200 | -1.63425300 | -0.47361100 |
| C | -1.42256200 | -2.04627200 | -1.48339400 |
| H | 0.96538700  | -1.01656000 | -1.83751800 |
| H | 2.45650600  | -2.85342900 | -0.38214700 |
| H | 1.91781300  | -2.77178100 | 1.32613200  |
| H | 5.21023800  | 0.03737700  | 1.99021200  |
| H | 3.51975100  | 0.59946100  | 2.02481100  |
| H | 4.69015700  | 1.36506900  | 0.92717800  |
| H | 6.04121000  | -1.11010400 | -0.23579600 |
| H | 5.30580600  | 0.13832000  | -1.26642000 |
| H | 4.80672200  | -1.56285900 | -1.43983800 |
| H | 1.44066700  | -0.39540100 | 1.14016100  |
| H | -1.92181400 | -2.94246400 | -1.11523200 |
| H | -0.91102800 | -2.25613600 | -2.42168100 |
| H | -2.15595800 | -1.24063500 | -1.59732100 |
| C | -0.30709900 | 0.93366200  | -0.50052000 |
| C | -1.17516700 | 0.64060500  | 0.56864800  |
| C | 0.88680100  | 1.79839800  | -0.35057100 |
| O | 1.38052100  | 2.17980900  | 0.68990100  |
| O | 1.38410300  | 2.10989800  | -1.55694800 |
| C | 2.60675500  | 2.84706300  | -1.53625100 |
| H | -0.76351500 | 0.97524400  | -1.48513400 |
| H | 3.37610500  | 2.26383000  | -1.02550800 |
| H | 2.46993800  | 3.80238900  | -1.02560900 |
| H | 2.87355700  | 3.00811400  | -2.57936000 |
| C | -0.94100100 | 0.96508800  | 2.01320700  |
| H | 0.11764600  | 0.91412300  | 2.25688100  |
| H | -1.29196900 | 1.98047500  | 2.22937700  |
| H | -1.50686000 | 0.27237800  | 2.63811900  |
| C | -4.70777100 | 0.34517500  | 0.46721900  |
| O | -5.65461500 | 0.91180400  | 0.95382100  |

|   |             |             |             |
|---|-------------|-------------|-------------|
| O | -4.76779300 | -0.54435300 | -0.51761100 |
| C | -6.08653600 | -0.80368400 | -1.01562400 |
| H | -5.96547700 | -1.56353700 | -1.78442900 |
| H | -6.72597700 | -1.16782600 | -0.20948100 |
| H | -6.51346800 | 0.10787800  | -1.43733000 |
| N | -2.50675800 | 0.45453600  | 0.10642600  |
| N | -3.38496700 | 0.54609900  | 0.98985700  |

**TS5b**

|   |             |             |             |
|---|-------------|-------------|-------------|
| C | -0.67497000 | 1.15682900  | -0.55414100 |
| C | -1.81257000 | 0.69243500  | 0.13462100  |
| C | -0.28564600 | 2.57596500  | -0.65218700 |
| O | -0.59292700 | 3.47740300  | 0.10331400  |
| O | 0.53611300  | 2.76092200  | -1.69990800 |
| C | 1.03346500  | 4.09195000  | -1.86194600 |
| H | -0.37145900 | 0.55368600  | -1.40191700 |
| H | 1.61156100  | 4.38953300  | -0.98473200 |
| H | 0.20778800  | 4.79160800  | -2.00449100 |
| H | 1.66755900  | 4.06475400  | -2.74579700 |
| C | 0.89816800  | 0.50423100  | 0.78099600  |
| O | 2.17298900  | -1.50185100 | 0.87075400  |
| C | 1.73877100  | -0.72917400 | -1.29300000 |
| C | 3.31556200  | -1.68364000 | 0.03228800  |
| O | 2.80477400  | -1.65449500 | -1.28694400 |
| C | 3.89637800  | -3.05590600 | 0.29699900  |
| C | 4.32077900  | -0.56053000 | 0.25839000  |
| C | 1.15570700  | -0.83482100 | 0.13305800  |
| O | -0.99639300 | -0.08824000 | 1.78839600  |
| N | 0.10914900  | 0.57102400  | 1.85355200  |
| C | 0.10922100  | 1.73817900  | 2.73828500  |
| H | 1.72886300  | 1.20851600  | 0.78075600  |
| H | 2.08335300  | 0.29212800  | -1.51137800 |
| H | 1.02987700  | -1.03469100 | -2.06493100 |
| H | 4.73729900  | -3.24110900 | -0.37575200 |

|   |             |             |             |
|---|-------------|-------------|-------------|
| H | 3.12590800  | -3.81188700 | 0.13185100  |
| H | 4.25039000  | -3.11837900 | 1.32880000  |
| H | 5.20353100  | -0.71817900 | -0.36684500 |
| H | 4.62665700  | -0.54077700 | 1.30731500  |
| H | 3.88690800  | 0.41150300  | 0.00559800  |
| H | 0.24416300  | -1.43637800 | 0.16780600  |
| H | -0.25863200 | 1.40958300  | 3.70945300  |
| H | -0.54652000 | 2.50567300  | 2.32138400  |
| H | 1.12543600  | 2.12020800  | 2.82982600  |
| C | -2.86883400 | 1.55089700  | 0.77496800  |
| H | -2.44901700 | 2.50244600  | 1.09448200  |
| H | -3.66078200 | 1.74656200  | 0.04279500  |
| H | -3.31890200 | 1.03477000  | 1.62311500  |
| C | -3.64672000 | -2.31287300 | -0.53078500 |
| O | -4.73808000 | -2.76733700 | -0.24791700 |
| N | -2.19060000 | -0.59685100 | -0.35844100 |
| N | -3.32217000 | -0.97489700 | -0.01669600 |
| N | -2.70496000 | -2.92161700 | -1.26765600 |
| H | -1.83457600 | -2.45266100 | -1.47437900 |
| H | -2.89699800 | -3.83300500 | -1.65512700 |

### **TS6b**

|   |             |             |             |
|---|-------------|-------------|-------------|
| C | -0.81747000 | 0.69503600  | 1.07129000  |
| O | -1.91413600 | -0.80238600 | -0.41370300 |
| C | -1.95924700 | -1.44806500 | 1.78707900  |
| C | -2.83630000 | -1.89261900 | -0.27140800 |
| O | -2.58457700 | -2.45065000 | 1.01094500  |
| C | -2.54371100 | -2.95305600 | -1.31415000 |
| C | -4.24736500 | -1.33442500 | -0.35524100 |
| C | -1.09176600 | -0.74673900 | 0.73983000  |
| O | 1.24906600  | 0.33530100  | 1.80395100  |
| N | 0.14003700  | 0.97339300  | 1.96110500  |
| C | 0.24115400  | 2.28844900  | 2.59622400  |
| H | -1.68936600 | 1.34619300  | 1.09185100  |

|   |             |             |             |
|---|-------------|-------------|-------------|
| H | -2.69324300 | -0.75454500 | 2.22095800  |
| H | -1.38366300 | -1.92007500 | 2.58418500  |
| H | -3.20409000 | -3.81218000 | -1.17035700 |
| H | -1.50490900 | -3.28014700 | -1.21873800 |
| H | -2.70439900 | -2.54698500 | -2.31583500 |
| H | -4.97653900 | -2.14345900 | -0.26393300 |
| H | -4.39411300 | -0.83137500 | -1.31447000 |
| H | -4.41179500 | -0.61094100 | 0.44821000  |
| H | -0.15516000 | -1.29192800 | 0.58285600  |
| H | 0.72583800  | 2.15036100  | 3.56222800  |
| H | -0.75734000 | 2.70258200  | 2.73249300  |
| H | 0.83831100  | 2.94543600  | 1.96036200  |
| C | 0.38264900  | 1.15355400  | -0.60730600 |
| C | 1.66839200  | 0.82597000  | -0.13090800 |
| C | -0.06639400 | 2.53891900  | -0.85941100 |
| O | 0.34757900  | 3.55280200  | -0.33111400 |
| O | -1.07212000 | 2.54901500  | -1.74831400 |
| C | -1.63228600 | 3.83493500  | -2.02548500 |
| H | -0.87056700 | 4.50223500  | -2.43310800 |
| H | -2.04453500 | 4.27268100  | -1.11393800 |
| H | -2.41958100 | 3.66302700  | -2.75678300 |
| C | 3.42962700  | -2.25097800 | -0.61885800 |
| O | 4.56189500  | -2.66603800 | -0.46287400 |
| N | 1.98637800  | -0.52676400 | -0.45535900 |
| N | 3.17805600  | -0.84096600 | -0.29779000 |
| N | 2.38225700  | -2.96855400 | -1.05597400 |
| H | 2.52214600  | -3.93362600 | -1.31395700 |
| H | 1.48147800  | -2.53053200 | -1.18620200 |
| H | -0.09544300 | 0.41009700  | -1.23624000 |
| C | 2.79917500  | 1.78812100  | 0.11103300  |
| H | 3.42875800  | 1.83112500  | -0.78544400 |
| H | 2.41800000  | 2.78623600  | 0.31694400  |
| H | 3.42271200  | 1.44710300  | 0.93778100  |

**TS7b**

|   |             |             |             |
|---|-------------|-------------|-------------|
| C | -0.75522500 | 0.88801800  | 0.72362800  |
| C | -1.55904900 | 0.51824400  | -0.37196900 |
| C | 0.08951800  | 2.09674900  | 0.81507900  |
| O | 0.55073500  | 2.50172900  | 1.86350500  |
| O | 0.29996500  | 2.72153500  | -0.35459300 |
| C | 0.98826300  | 3.97434500  | -0.26757200 |
| H | -1.14417700 | 0.61515900  | 1.70039500  |
| H | 1.07445900  | 4.33327700  | -1.29100900 |
| H | 1.97647900  | 3.84548200  | 0.17850800  |
| H | 0.41103400  | 4.67483900  | 0.33892700  |
| C | 0.72171900  | -0.74077300 | 0.70570400  |
| O | 2.52497300  | -1.29466400 | -0.74819700 |
| C | 2.75972600  | 0.75798000  | 0.35005300  |
| C | 3.86827900  | -1.11541900 | -0.29847000 |
| O | 4.00363800  | 0.28079400  | -0.11920800 |
| C | 4.80866800  | -1.55658300 | -1.39915600 |
| C | 4.09216700  | -1.86443700 | 1.00972700  |
| C | 1.73186800  | -0.20682800 | -0.28674000 |
| O | -0.80069300 | -1.30557100 | -0.81939800 |
| N | -0.20325400 | -1.59703100 | 0.28126800  |
| C | -0.95357500 | -2.43923900 | 1.20965800  |
| H | 1.06908400  | -0.91223600 | 1.72228300  |
| H | 2.70585700  | 0.74199300  | 1.44685500  |
| H | 2.64139600  | 1.78508400  | 0.00626200  |
| H | 5.84397600  | -1.37885600 | -1.09811600 |
| H | 4.59220000  | -0.99002900 | -2.30722500 |
| H | 4.67710800  | -2.62305600 | -1.59658200 |
| H | 5.12401900  | -1.73168600 | 1.34501600  |
| H | 3.89827900  | -2.93016800 | 0.86564800  |
| H | 3.42331300  | -1.49436500 | 1.79239000  |
| H | 1.22906400  | 0.23420700  | -1.14970600 |
| H | -1.25687800 | -3.33603700 | 0.67035400  |
| H | -1.84275800 | -1.88769900 | 1.53120100  |



|   |             |             |             |
|---|-------------|-------------|-------------|
| H | -0.32592100 | -2.70091200 | 2.06011600  |
| C | -4.93564100 | -0.66473100 | -0.21499300 |
| O | -5.83919600 | -0.88522300 | -0.99901800 |
| N | -3.71250700 | -0.06268700 | -0.74697400 |
| N | -2.78484300 | -0.05855800 | 0.08209300  |
| C | -1.50499100 | 1.08072200  | -1.76138000 |
| H | -2.04589000 | 2.03154800  | -1.80781400 |
| H | -0.47705800 | 1.25722400  | -2.07044800 |
| H | -1.98181300 | 0.38101900  | -2.44875400 |
| N | -4.96576000 | -0.90976600 | 1.10552500  |
| H | -4.16351600 | -0.70575300 | 1.68338700  |
| H | -5.78943600 | -1.32982500 | 1.50878000  |

### **TS8b**

|   |             |             |             |
|---|-------------|-------------|-------------|
| C | 0.45292700  | -0.91269900 | -0.93585400 |
| O | 2.58564500  | -0.08684800 | -0.35682600 |
| C | 2.22969900  | -2.23223200 | 0.30840400  |
| C | 3.76626400  | -0.50960700 | 0.32430300  |
| O | 3.48428100  | -1.82207000 | 0.81903100  |
| C | 4.04681000  | 0.39430200  | 1.51211600  |
| C | 4.89592600  | -0.55613300 | -0.68607300 |
| C | 1.52205400  | -0.89070600 | 0.11884700  |
| O | -1.15997500 | -1.57192500 | 0.44249000  |
| N | -0.62909900 | -1.66145100 | -0.72824000 |
| C | -1.53982100 | -1.99924800 | -1.81875400 |
| H | 0.80459100  | -0.84892300 | -1.96270300 |
| H | 2.33707800  | -2.75426500 | -0.65231600 |
| H | 1.73839200  | -2.88386700 | 1.03292000  |
| H | 4.88349900  | -0.00355700 | 2.09252600  |
| H | 3.16189800  | 0.44982000  | 2.15154000  |
| H | 4.30054800  | 1.40104400  | 1.16976400  |
| H | 5.81922300  | -0.87772800 | -0.19770200 |
| H | 5.05364000  | 0.43454200  | -1.12137800 |
| H | 4.64553700  | -1.26057200 | -1.48355500 |

|   |             |             |             |
|---|-------------|-------------|-------------|
| H | 1.14572200  | -0.52299600 | 1.07936500  |
| H | -2.07179100 | -2.90671800 | -1.53536000 |
| H | -0.97369300 | -2.16023100 | -2.73513300 |
| H | -2.25532200 | -1.17810500 | -1.93638800 |
| C | -0.61969700 | 0.90594900  | -0.45858300 |
| C | -1.50523900 | 0.44164300  | 0.53110100  |
| C | 0.52781000  | 1.78977000  | -0.15616000 |
| O | 0.97017900  | 2.05455300  | 0.94249900  |
| O | 1.05032600  | 2.27583400  | -1.29297400 |
| C | 2.23081900  | 3.06096200  | -1.12654100 |
| H | -1.04044600 | 1.04246800  | -1.45040200 |
| H | 3.01400300  | 2.45056500  | -0.67139200 |
| H | 2.02822000  | 3.92900800  | -0.49596900 |
| H | 2.52116800  | 3.37620800  | -2.12725200 |
| C | -1.33455300 | 0.59615700  | 2.01235400  |
| H | -0.28477100 | 0.54099000  | 2.29011900  |
| H | -1.72216400 | 1.56904000  | 2.33434300  |
| H | -1.90213200 | -0.18112700 | 2.52577900  |
| C | -5.05151200 | 0.06694000  | 0.24556300  |
| O | -5.98304000 | -0.19725000 | 0.98226400  |
| N | -2.82173600 | 0.28570600  | 0.00659700  |
| N | -3.73113700 | 0.22657000  | 0.85486600  |
| N | -5.13095800 | 0.24579200  | -1.08382000 |
| H | -4.30047000 | 0.43591900  | -1.62533700 |
| H | -6.02048000 | 0.12323000  | -1.54349400 |

**Pla**

|   |             |             |             |
|---|-------------|-------------|-------------|
| C | -2.64661300 | -1.99320900 | 0.47447200  |
| C | -1.62893200 | -0.32043100 | -0.92440000 |
| C | -2.91861300 | 0.24251500  | -0.31670600 |
| C | -3.12639300 | -0.61307700 | 0.93555700  |
| H | -3.47978300 | -2.56538700 | 0.05741000  |
| H | -2.17500400 | -2.59561400 | 1.25315600  |
| H | -1.64806700 | -0.15994300 | -2.00393000 |

|   |             |             |             |
|---|-------------|-------------|-------------|
| H | -2.51722300 | -0.20618700 | 1.74633500  |
| C | -0.26626300 | 0.18409300  | -0.36674300 |
| H | 0.38206800  | 0.39949500  | -1.21696600 |
| C | 0.32154300  | -1.05152300 | 0.35170100  |
| N | -1.66770600 | -1.77319600 | -0.62680300 |
| O | -0.35468400 | -2.15194300 | -0.25023800 |
| H | -2.85003500 | 1.31694000  | -0.09758800 |
| H | -4.16818000 | -0.62073500 | 1.26434600  |
| C | -0.33930500 | 1.44624000  | 0.46287300  |
| O | -0.83547600 | 1.53630900  | 1.56413100  |
| O | 0.18648500  | 2.48112600  | -0.19263400 |
| C | 0.13388300  | 3.73717300  | 0.49534400  |
| H | 0.70639300  | 3.68005200  | 1.42284900  |
| H | 0.57439800  | 4.46313400  | -0.18438200 |
| H | -0.90132800 | 3.99854100  | 0.72182300  |
| C | 0.26781200  | -1.12106000 | 1.87625900  |
| H | 0.70704400  | -2.07293900 | 2.18627900  |
| H | 0.83192300  | -0.29781500 | 2.31826000  |
| H | -0.75983500 | -1.07218300 | 2.23272900  |
| N | 1.73817200  | -1.27743100 | -0.00314500 |
| N | 2.41245500  | -0.25306100 | 0.12353200  |
| C | 3.82217500  | -0.51639300 | -0.15386400 |
| O | 4.38648900  | -1.55890900 | 0.03555100  |
| C | -5.12976300 | 0.69599100  | -1.00967300 |
| H | -5.80852500 | 0.49462100  | -1.83987500 |
| H | -5.59672600 | 0.35091600  | -0.07892300 |
| H | -4.95850700 | 1.77857800  | -0.93623900 |
| O | -3.92518600 | 0.01314600  | -1.28548300 |
| O | 4.35798400  | 0.60567300  | -0.59829300 |
| C | 5.75693300  | 0.52400300  | -0.91118000 |
| H | 5.92149300  | -0.22942300 | -1.68291000 |
| H | 6.03507100  | 1.51218100  | -1.26916800 |
| H | 6.32071000  | 0.26244200  | -0.01441700 |

**P2a**

|   |             |             |             |
|---|-------------|-------------|-------------|
| C | 1.30510900  | -1.64233800 | 1.99737400  |
| C | 0.50279100  | -1.08458500 | -0.20674500 |
| C | 1.60757200  | -2.15517100 | -0.34284900 |
| C | 2.37099800  | -2.10554200 | 0.98918300  |
| H | 1.00857100  | -2.44084400 | 2.68158600  |
| H | 1.64426300  | -0.78243700 | 2.57663400  |
| H | -0.34106200 | -1.36361100 | -0.84698400 |
| H | 3.18800300  | -1.38552500 | 0.95157800  |
| C | 0.68541500  | 0.43482500  | -0.42123200 |
| H | 0.43030400  | 0.72594700  | -1.44118800 |
| C | -0.40772800 | 0.92063800  | 0.56812600  |
| N | 0.10476800  | -1.24306600 | 1.20465100  |
| O | -0.31764900 | 0.06039400  | 1.66149800  |
| H | 2.78348000  | -3.08647800 | 1.23377900  |
| C | 1.99066300  | 1.09060500  | -0.03667400 |
| O | 2.62363900  | 0.86966600  | 0.97083200  |
| O | 2.33051200  | 2.02428200  | -0.92833500 |
| C | 3.52613000  | 2.75607100  | -0.62756600 |
| H | 3.42152700  | 3.26610200  | 0.33180800  |
| H | 3.64297100  | 3.47440000  | -1.43572800 |
| H | 4.38033700  | 2.07703200  | -0.58812500 |
| C | -0.31752300 | 2.35727800  | 1.05440600  |
| H | -1.14602300 | 2.55603600  | 1.73874500  |
| H | -0.38032200 | 3.04639600  | 0.20956500  |
| H | 0.62449000  | 2.50653800  | 1.58593900  |
| N | -1.68468100 | 0.81573600  | -0.19382500 |
| N | -2.49541900 | 0.03351700  | 0.30483800  |
| C | -3.69081300 | -0.06573500 | -0.51343000 |
| O | -3.69087300 | -0.25979800 | -1.69947500 |
| H | 1.05872900  | -3.10295700 | -0.36762500 |
| C | 3.18421100  | -1.07652800 | -1.82216100 |
| H | 2.60433300  | -0.22069500 | -2.18821800 |
| H | 3.78891700  | -0.76434400 | -0.96253300 |

|   |             |             |             |
|---|-------------|-------------|-------------|
| H | 3.85786400  | -1.39761700 | -2.61868800 |
| O | 2.35895100  | -2.18523400 | -1.52830200 |
| O | -4.74623600 | 0.01232600  | 0.27780800  |
| C | -6.01305400 | -0.11266100 | -0.38726000 |
| H | -6.08994700 | -1.09630900 | -0.85331400 |
| H | -6.76395800 | 0.00623800  | 0.38993700  |
| H | -6.11452700 | 0.66458600  | -1.14606100 |

### **P3a**

|   |             |             |             |
|---|-------------|-------------|-------------|
| C | -0.18686700 | 1.87305100  | -1.81490400 |
| C | 1.41915400  | 0.85805300  | -0.34301500 |
| C | 0.59786700  | 1.91491200  | 0.41974000  |
| C | 0.17442600  | 2.86248400  | -0.70594500 |
| H | -0.14767600 | 2.31669800  | -2.81217200 |
| H | -1.18098000 | 1.44683200  | -1.65909900 |
| H | 2.46504600  | 1.16987100  | -0.41846300 |
| H | -0.66190000 | 3.50865700  | -0.43142700 |
| C | 1.32821900  | -0.55798000 | 0.21811700  |
| C | 0.16118800  | -1.15227000 | -0.61392500 |
| N | 0.83830100  | 0.79906900  | -1.70748300 |
| O | 0.21969500  | -0.49282900 | -1.84745400 |
| H | -0.30252100 | 1.44347700  | 0.83458000  |
| H | 1.07618200  | -0.54077300 | 1.27941300  |
| H | 1.01416400  | 3.49080700  | -1.01972500 |
| C | 2.59472000  | -1.34950200 | -0.06084400 |
| O | 3.27722200  | -1.14014500 | -1.03402800 |
| O | 2.92272800  | -2.35682200 | 0.75912800  |
| C | 2.25742800  | -2.55837900 | 2.01055400  |
| H | 2.68623500  | -3.47072900 | 2.42080300  |
| H | 2.45220800  | -1.72474100 | 2.68909500  |
| H | 1.18114800  | -2.69306100 | 1.88074700  |
| C | 0.18273800  | -2.65003200 | -0.89040500 |
| H | 0.09028200  | -3.22673500 | 0.03212500  |
| H | -0.66384000 | -2.89230600 | -1.53778200 |

|   |             |             |             |
|---|-------------|-------------|-------------|
| H | 1.10905100  | -2.91564200 | -1.40386600 |
| N | -1.07026200 | -0.90776900 | 0.19301900  |
| N | -2.00672000 | -0.43371100 | -0.45097300 |
| C | -3.14853100 | -0.17325900 | 0.40448400  |
| O | -3.09154600 | 0.48005700  | 1.41228700  |
| C | 2.27743700  | 3.39752700  | 1.26647100  |
| H | 2.80557300  | 3.56172100  | 2.20693400  |
| H | 2.99654100  | 3.04251900  | 0.51814800  |
| H | 1.85469100  | 4.34956500  | 0.92543100  |
| O | 1.26475500  | 2.44757100  | 1.53871600  |
| O | -4.22781800 | -0.68510700 | -0.15494100 |
| C | -5.45275700 | -0.44794400 | 0.55944100  |
| H | -5.63077800 | 0.62550200  | 0.63830400  |
| H | -6.23064800 | -0.92816300 | -0.02889100 |
| H | -5.39243400 | -0.88837200 | 1.55562900  |

#### **P4a**

|   |             |             |             |
|---|-------------|-------------|-------------|
| C | -0.56511000 | 1.82741600  | 1.68660700  |
| C | 1.52507400  | 0.94693100  | 0.90345700  |
| C | 1.23388800  | 2.29350600  | 0.22552900  |
| C | -0.29555900 | 2.38124400  | 0.28704200  |
| H | -0.47850800 | 2.62359700  | 2.43253100  |
| H | -1.53494700 | 1.34554800  | 1.81137800  |
| H | 2.52989600  | 0.89687200  | 1.32625500  |
| H | -0.72999400 | 1.74546700  | -0.49590600 |
| C | 1.29597300  | -0.24984600 | -0.03500300 |
| C | 0.11534900  | -1.00780800 | 0.62312600  |
| N | 0.51343300  | 0.83892800  | 1.98195600  |
| O | 0.02999000  | -0.50220500 | 1.93226000  |
| H | 1.01679000  | 0.06314000  | -1.04287500 |
| H | -0.68071300 | 3.39533800  | 0.15949900  |
| C | 2.51989800  | -1.13732500 | -0.13466300 |
| O | 3.37814600  | -1.23997200 | 0.71085200  |
| O | 2.50956300  | -1.83870600 | -1.26964900 |

|   |             |             |             |
|---|-------------|-------------|-------------|
| C | 3.58316500  | -2.77595200 | -1.42367300 |
| H | 3.43599800  | -3.23574400 | -2.39835900 |
| H | 3.53855700  | -3.52714000 | -0.63231400 |
| H | 4.54259900  | -2.25778100 | -1.38153100 |
| C | 0.22498700  | -2.52316800 | 0.71298700  |
| H | 0.24022300  | -2.96893000 | -0.28364200 |
| H | -0.63923400 | -2.90240300 | 1.26412700  |
| H | 1.13905700  | -2.79066100 | 1.24849600  |
| N | -1.08702100 | -0.74358200 | -0.22487500 |
| N | -2.11737300 | -0.56742700 | 0.42669100  |
| C | -3.24317400 | -0.29109500 | -0.44520200 |
| O | -3.24046800 | 0.55244100  | -1.30173400 |
| H | 1.67087700  | 3.10462300  | 0.83024500  |
| C | 1.64828500  | 3.54048100  | -1.71951900 |
| H | 2.19588700  | 3.47163600  | -2.66047500 |
| H | 0.59392100  | 3.75425500  | -1.93288900 |
| H | 2.06212500  | 4.36129900  | -1.11844400 |
| O | 1.80238500  | 2.30059000  | -1.05833300 |
| O | -4.25813900 | -1.05100700 | -0.07831400 |
| C | -5.46770300 | -0.85404000 | -0.82877200 |
| H | -6.18484200 | -1.55873500 | -0.41528100 |
| H | -5.81566800 | 0.17250500  | -0.70451000 |
| H | -5.28754800 | -1.05951000 | -1.88486300 |

### **P1b**

|   |             |             |             |
|---|-------------|-------------|-------------|
| C | -2.29128300 | -1.98345900 | 0.63291000  |
| C | -1.36689200 | -0.36454100 | -0.88991400 |
| C | -2.63477000 | 0.20957600  | -0.24773600 |
| C | -2.77381800 | -0.59030400 | 1.04992000  |
| H | -3.13291200 | -2.58825600 | 0.28458300  |
| H | -1.77391600 | -2.53977600 | 1.41657300  |
| H | -1.44486400 | -0.25760600 | -1.97354000 |
| H | -2.13736200 | -0.13647500 | 1.81325500  |
| C | 0.01631400  | 0.18103500  | -0.43265500 |

|   |             |             |             |
|---|-------------|-------------|-------------|
| H | 0.61909900  | 0.35065200  | -1.32565500 |
| C | 0.65433000  | -1.00716000 | 0.32354900  |
| N | -1.36858000 | -1.80265700 | -0.52242800 |
| O | -0.03387500 | -2.14510500 | -0.19019600 |
| H | -2.57318000 | 1.29324800  | -0.07902400 |
| H | -3.79930000 | -0.59830900 | 1.42622000  |
| C | -0.02110100 | 1.48588900  | 0.32906900  |
| O | -0.49880800 | 1.64124700  | 1.43144200  |
| O | 0.51901000  | 2.47622600  | -0.38242400 |
| C | 0.50392900  | 3.76351400  | 0.24634700  |
| H | 1.08661700  | 3.73646200  | 1.16889500  |
| H | 0.95201500  | 4.44715300  | -0.47138300 |
| H | -0.52193900 | 4.05983100  | 0.47250500  |
| C | 0.66593700  | -0.99221300 | 1.84981700  |
| H | 1.12222500  | -1.92442800 | 2.19301800  |
| H | 1.24837700  | -0.14569400 | 2.21868300  |
| H | -0.34380800 | -0.92267400 | 2.25108700  |
| N | 2.05672300  | -1.23449300 | -0.08366800 |
| N | 2.71326300  | -0.19416100 | -0.06380300 |
| C | 4.13118600  | -0.43620700 | -0.42649800 |
| O | 4.61567000  | -1.53129900 | -0.60248200 |
| N | 4.74945100  | 0.74917100  | -0.51107300 |
| H | 5.72702700  | 0.79247600  | -0.76077700 |
| H | 4.24111900  | 1.60521200  | -0.34326600 |
| C | -4.89195500 | 0.57421600  | -0.84449200 |
| H | -5.59142800 | 0.35623200  | -1.65313600 |
| H | -5.31992200 | 0.21473100  | 0.09930400  |
| H | -4.74828100 | 1.66106400  | -0.77367300 |
| O | -3.67910000 | -0.07493600 | -1.16118700 |

**P2b**

|   |            |             |             |
|---|------------|-------------|-------------|
| C | 0.95623200 | -1.77796500 | 1.87019500  |
| C | 0.18365000 | -1.07448300 | -0.29949300 |
| C | 1.28880300 | -2.13470300 | -0.49653600 |



|   |             |             |             |
|---|-------------|-------------|-------------|
| C | 2.03144600  | -2.18530000 | 0.84744000  |
| H | 0.65594700  | -2.61098400 | 2.51007800  |
| H | 1.29142000  | -0.94822100 | 2.49441200  |
| H | -0.64937400 | -1.30358400 | -0.97220700 |
| H | 2.85787300  | -1.47497700 | 0.87118100  |
| C | 0.37007600  | 0.45662800  | -0.39463800 |
| H | 0.13215200  | 0.82469300  | -1.39373200 |
| C | -0.74065800 | 0.87140800  | 0.60726600  |
| N | -0.23728500 | -1.33910200 | 1.08794900  |
| O | -0.68577700 | -0.07924100 | 1.62939700  |
| H | 2.42954000  | -3.18554600 | 1.02957000  |
| C | 1.67087500  | 1.07940400  | 0.05551100  |
| O | 2.29608700  | 0.78018900  | 1.04771200  |
| O | 2.01924900  | 2.08094500  | -0.75625400 |
| C | 3.21069800  | 2.78692100  | -0.38620200 |
| H | 3.08830300  | 3.23546100  | 0.60134900  |
| H | 3.34509800  | 3.55477800  | -1.14452700 |
| H | 4.06240100  | 2.10379600  | -0.37384400 |
| C | -0.63841100 | 2.25978500  | 1.21873200  |
| H | -1.48328500 | 2.41682700  | 1.89395700  |
| H | -0.66514600 | 3.01905500  | 0.43431500  |
| H | 0.28972800  | 2.34462700  | 1.78753900  |
| N | -2.00297400 | 0.86571400  | -0.18218300 |
| N | -2.81615000 | 0.01881600  | 0.18167200  |
| C | -4.05253600 | 0.07820700  | -0.63978200 |
| O | -4.26889400 | 0.89681000  | -1.50558500 |
| N | -4.86101800 | -0.91551500 | -0.24641000 |
| H | -5.75886100 | -1.04426900 | -0.69017700 |
| H | -4.57774000 | -1.54225400 | 0.49248300  |
| H | 0.73923600  | -3.07681800 | -0.59950700 |
| C | 2.88053600  | -0.94878700 | -1.87320000 |
| H | 2.29713400  | -0.06840800 | -2.16804800 |
| H | 3.48631300  | -0.70504700 | -0.99222300 |
| H | 3.55338200  | -1.20232900 | -2.69436200 |

O 2.05978800 -2.08031300 -1.66892100

**P3b**

C -0.77572600 1.80686100 -1.70615700  
C 1.03659500 0.93853300 -0.38741000  
C 0.20232700 1.93145700 0.44509900  
C -0.39815800 2.83202200 -0.63712200  
H -0.87467600 2.24407300 -2.70200200  
H -1.70772900 1.29475100 -1.45351600  
H 2.04616600 1.32846700 -0.54725400  
H -1.25635500 3.41035100 -0.28842900  
C 1.09953300 -0.47799900 0.17665400  
C -0.07143600 -1.16982800 -0.57012200  
N 0.34916100 0.83215200 -1.69893800  
O -0.15542200 -0.50959000 -1.80366000  
H -0.61360200 1.38872600 0.94010100  
H 0.91849000 -0.47553900 1.25242900  
H 0.35457600 3.52467100 -1.02735100  
C 2.40253700 -1.16945800 -0.18364600  
O 3.01246700 -0.90509800 -1.19114200  
O 2.84788000 -2.15719700 0.60501200  
C 2.27296700 -2.41088900 1.89087400  
H 2.77932400 -3.30006600 2.26222400  
H 2.45903700 -1.57369500 2.56760100  
H 1.20059600 -2.60719800 1.82428200  
C 0.05602400 -2.65923200 -0.86345200  
H 0.07127100 -3.24937800 0.05480000  
H -0.80993600 -2.96413200 -1.45669100  
H 0.96421900 -2.84604900 -1.44034000  
N -1.25530700 -1.03355100 0.32818500  
N -2.28122900 -0.66756800 -0.24123700  
C -3.40009300 -0.54299400 0.71403500  
O -3.25165300 -0.20784700 1.86911700  
N -4.55366900 -0.79929500 0.08270800

|   |             |             |             |
|---|-------------|-------------|-------------|
| H | -5.42494000 | -0.76615500 | 0.59236300  |
| H | -4.56324200 | -1.05012200 | -0.89540100 |
| C | 1.81761800  | 3.55938900  | 1.12936500  |
| H | 2.42073300  | 3.77419900  | 2.01281400  |
| H | 2.48615400  | 3.26259900  | 0.31194500  |
| H | 1.28288900  | 4.46962000  | 0.83393600  |
| O | 0.92188000  | 2.52792400  | 1.49751600  |

**P4b**

|   |             |             |             |
|---|-------------|-------------|-------------|
| C | -1.26677400 | 1.48578400  | 1.65186500  |
| C | 0.99351100  | 1.05579000  | 0.97011600  |
| C | 0.49183300  | 2.36133400  | 0.33555100  |
| C | -1.02839200 | 2.16720200  | 0.30314800  |
| H | -1.37263500 | 2.23629600  | 2.44137300  |
| H | -2.13414500 | 0.82654100  | 1.68690000  |
| H | 1.95997000  | 1.17747200  | 1.46211700  |
| H | -1.29417900 | 1.51554800  | -0.53954300 |
| C | 1.06350900  | -0.11055400 | -0.03085100 |
| C | -0.02036200 | -1.09294700 | 0.47854400  |
| N | -0.04262300 | 0.69280000  | 1.96785800  |
| O | -0.26891000 | -0.70651500 | 1.80835300  |
| H | 0.82708000  | 0.20240900  | -1.04939200 |
| H | -1.58406500 | 3.10259800  | 0.20639400  |
| C | 2.42607700  | -0.77143800 | -0.03576300 |
| O | 3.21053600  | -0.75983600 | 0.88418300  |
| O | 2.63799500  | -1.42041000 | -1.18245200 |
| C | 3.86317700  | -2.16026700 | -1.25546100 |
| H | 3.86947400  | -2.62406000 | -2.23950200 |
| H | 3.88971200  | -2.91981100 | -0.47119300 |
| H | 4.71525000  | -1.48807500 | -1.14069500 |
| C | 0.32660600  | -2.57455700 | 0.48157100  |
| H | 0.48194100  | -2.93724500 | -0.53640700 |
| H | -0.50223000 | -3.12273600 | 0.93666200  |
| H | 1.23246000  | -2.73887300 | 1.07054900  |

|   |             |             |             |
|---|-------------|-------------|-------------|
| N | -1.19226400 | -0.95391200 | -0.44100600 |
| N | -2.27612800 | -1.04598800 | 0.13191800  |
| C | -3.39184700 | -0.89055000 | -0.82102300 |
| O | -3.33505200 | -0.18014900 | -1.80181000 |
| N | -4.44569700 | -1.59868700 | -0.39244800 |
| H | -5.29926800 | -1.60814900 | -0.93208800 |
| H | -4.39298200 | -2.13985000 | 0.45832400  |
| H | 0.73783600  | 3.20279200  | 1.00332700  |
| C | 0.79342700  | 3.78226800  | -1.50960500 |
| H | 1.38904100  | 3.86046600  | -2.42019400 |
| H | -0.27052100 | 3.83585400  | -1.77122700 |
| H | 1.03783300  | 4.62044700  | -0.84336500 |
| O | 1.11815900  | 2.54522100  | -0.90762900 |

**P5a**

|   |             |             |             |
|---|-------------|-------------|-------------|
| C | -0.16452300 | 0.97541300  | -0.10289500 |
| C | -1.38273000 | 0.87866800  | 0.87503600  |
| C | 0.85714600  | 0.03770900  | 0.55068400  |
| O | 2.58730200  | -1.62151500 | 0.15079200  |
| C | 2.52287000  | 0.13298500  | -1.37656100 |
| C | 3.89753500  | -1.34764300 | -0.35430400 |
| O | 3.68725800  | -0.64578500 | -1.56533700 |
| C | 4.58826500  | -2.65714200 | -0.66984200 |
| C | 4.66297500  | -0.49847800 | 0.65314900  |
| C | 1.64901400  | -0.75727900 | -0.47471100 |
| O | -0.91607000 | 0.12752200  | 1.95032300  |
| N | -0.00054400 | -0.83362500 | 1.36861900  |
| C | 0.68184300  | -1.42446900 | 2.51047200  |
| C | 0.33182600  | 2.39867700  | -0.25298500 |
| O | 1.26983300  | 2.88005200  | 0.33980800  |
| O | -0.43169900 | 3.07568400  | -1.11046100 |
| C | -0.10881000 | 4.46528300  | -1.25954400 |
| H | -0.47949000 | 0.61830900  | -1.08936100 |
| H | 1.54236100  | 0.62399500  | 1.18394900  |

|   |             |             |             |
|---|-------------|-------------|-------------|
| H | 2.75589100  | 1.08758000  | -0.88525600 |
| H | 2.07347400  | 0.33080800  | -2.35128000 |
| H | 5.57427400  | -2.46675800 | -1.10101400 |
| H | 3.98366000  | -3.22214800 | -1.38273600 |
| H | 4.71109400  | -3.24280000 | 0.24449800  |
| H | 5.67122400  | -0.29398400 | 0.28325600  |
| H | 4.73480500  | -1.02992600 | 1.60564700  |
| H | 4.15150100  | 0.45278000  | 0.82777100  |
| H | 0.95201200  | -1.36567000 | -1.06552500 |
| H | -0.05469000 | -1.95322400 | 3.11807600  |
| H | 1.18586400  | -0.66143600 | 3.12101600  |
| H | 1.41772200  | -2.13067100 | 2.12738800  |
| H | 0.91166800  | 4.57479200  | -1.62996500 |
| H | -0.20698900 | 4.97488700  | -0.29898600 |
| H | -0.82414400 | 4.85804600  | -1.97840400 |
| C | -1.94981600 | 2.18275000  | 1.41061000  |
| H | -2.38553100 | 2.77031100  | 0.60084700  |
| H | -2.72474500 | 1.95325200  | 2.14623000  |
| H | -1.15587400 | 2.75687600  | 1.89506000  |
| C | -4.03646900 | -1.33998200 | -0.10618500 |
| O | -5.12894400 | -1.47672000 | 0.37748800  |
| O | -3.64346300 | -1.73822600 | -1.30358400 |
| C | -4.65139900 | -2.40265400 | -2.08357700 |
| H | -4.15707500 | -2.69811600 | -3.00592200 |
| H | -5.02141800 | -3.27611500 | -1.54436600 |
| H | -5.47472700 | -1.71655600 | -2.28721000 |
| N | -2.94629900 | -0.76835500 | 0.65145100  |
| N | -2.47615200 | 0.22835800  | 0.09964200  |

**P6a**

|   |            |             |             |
|---|------------|-------------|-------------|
| C | 1.15981300 | -0.17907400 | 0.62110700  |
| O | 0.99738600 | 1.84340200  | -0.68944800 |
| C | 1.35559300 | 2.16888200  | 1.59402700  |
| C | 1.80315600 | 3.00416800  | -0.46878700 |

|   |             |             |             |
|---|-------------|-------------|-------------|
| O | 1.56726800  | 3.37153500  | 0.87750400  |
| C | 1.31384000  | 4.12114000  | -1.36601000 |
| C | 3.27082600  | 2.66098700  | -0.69574400 |
| C | 0.66516000  | 1.26332300  | 0.56451300  |
| O | -0.53718800 | -1.29447200 | 1.68080500  |
| N | 0.77121800  | -0.75793000 | 1.90997000  |
| C | 1.61865600  | -1.86949600 | 2.34042600  |
| C | 0.49483400  | -1.05890200 | -0.44737700 |
| C | -0.74895200 | -1.59575500 | 0.31327600  |
| C | 1.34984600  | -2.13780400 | -1.09446100 |
| O | 0.92493200  | -2.89417700 | -1.93624200 |
| O | 2.61666800  | -2.13689600 | -0.67839200 |
| C | 3.46872900  | -3.10801100 | -1.30152200 |
| H | 2.24913500  | -0.18780700 | 0.53517900  |
| H | 2.30416900  | 1.73033900  | 1.93600700  |
| H | 0.73483300  | 2.38638300  | 2.46332300  |
| H | 1.88861400  | 5.03136000  | -1.17709400 |
| H | 0.25778800  | 4.31132300  | -1.16248900 |
| H | 1.43582400  | 3.83887100  | -2.41458500 |
| H | 3.89241400  | 3.54532000  | -0.53160100 |
| H | 3.41699900  | 2.30849400  | -1.71989500 |
| H | 3.59570100  | 1.87259600  | -0.01018800 |
| H | -0.42403800 | 1.29265000  | 0.68780300  |
| H | 1.20900200  | -2.26771200 | 3.26968900  |
| H | 2.61767700  | -1.47109800 | 2.53289100  |
| H | 1.69082200  | -2.67621400 | 1.60005400  |
| H | 0.15331000  | -0.44613300 | -1.28873100 |
| H | 3.52127100  | -2.92215400 | -2.37554300 |
| H | 3.08262600  | -4.11274400 | -1.12259300 |
| H | 4.44503400  | -2.98099500 | -0.83944300 |
| C | -1.11370600 | -3.06556200 | 0.15418900  |
| H | -1.97094600 | -3.27615100 | 0.79900200  |
| H | -1.36710100 | -3.29454700 | -0.88115000 |
| H | -0.27468400 | -3.69296500 | 0.46354300  |

|   |             |             |             |
|---|-------------|-------------|-------------|
| C | -3.59082400 | 0.59054200  | -0.01289900 |
| O | -3.55110300 | 1.78933100  | -0.09668800 |
| N | -2.50889100 | -0.14978300 | 0.59070300  |
| N | -1.91727300 | -0.84714200 | -0.23480200 |
| O | -4.59007500 | -0.20156000 | -0.35384600 |
| C | -5.74794600 | 0.47327600  | -0.87582200 |
| H | -5.48813700 | 0.99412500  | -1.79832600 |
| H | -6.47914300 | -0.30862500 | -1.06550300 |
| H | -6.12381200 | 1.18607800  | -0.14048800 |

**P7a**

|   |             |             |             |
|---|-------------|-------------|-------------|
| C | 0.14941100  | 1.18416500  | -0.67927600 |
| C | 1.39543200  | 1.57328700  | 0.13851100  |
| C | -0.39845000 | 0.06186600  | 0.21833400  |
| O | -2.28481700 | -1.31646800 | 0.81802400  |
| C | -2.21277500 | -0.69667300 | -1.40544600 |
| C | -3.12163200 | -2.19161300 | 0.04912800  |
| O | -3.33206100 | -1.53188300 | -1.18834500 |
| C | -4.46197700 | -2.34653100 | 0.73852300  |
| C | -2.39289600 | -3.51253600 | -0.14909400 |
| C | -1.87684600 | -0.22412500 | 0.01037600  |
| O | 1.03277500  | 1.41272100  | 1.47527200  |
| N | -0.13161500 | 0.54653400  | 1.57773700  |
| C | 0.21642500  | -0.52196400 | 2.50696600  |
| C | -0.84628700 | 2.30676400  | -0.90684700 |
| O | -1.36130100 | 2.52296400  | -1.98019000 |
| O | -1.12284300 | 2.99358500  | 0.20011400  |
| C | -2.08853100 | 4.04409300  | 0.04818400  |
| H | 0.42824200  | 0.80918400  | -1.66568400 |
| H | 0.16830100  | -0.86072900 | 0.00262900  |
| H | -1.37324000 | -1.25608000 | -1.84431200 |
| H | -2.49713500 | 0.11467100  | -2.07712300 |
| H | -5.12287700 | -2.97421100 | 0.13525500  |
| H | -4.91833500 | -1.36240000 | 0.86809200  |

|   |             |             |             |
|---|-------------|-------------|-------------|
| H | -4.32747100 | -2.81407700 | 1.71695400  |
| H | -3.01132800 | -4.19760800 | -0.73479500 |
| H | -2.17920200 | -3.96859900 | 0.82113300  |
| H | -1.44621700 | -3.34958200 | -0.67202400 |
| H | -2.45948400 | 0.66720900  | 0.28128900  |
| H | 0.44545800  | -0.07964300 | 3.47835100  |
| H | 1.07228800  | -1.11459300 | 2.16007700  |
| H | -0.66494300 | -1.15874700 | 2.60006300  |
| H | -3.03638700 | 3.63163700  | -0.30202000 |
| H | -1.72548900 | 4.78506700  | -0.66601400 |
| H | -2.20089900 | 4.48368400  | 1.03644300  |
| C | 1.97426400  | 2.96231800  | -0.07469800 |
| H | 2.86627600  | 3.07682700  | 0.54675400  |
| H | 2.25517700  | 3.09611700  | -1.12178000 |
| H | 1.23979700  | 3.71503300  | 0.21280100  |
| C | 3.86659700  | -1.04750700 | 0.03281200  |
| O | 5.00285900  | -1.00555900 | 0.42140900  |
| O | 3.34122700  | -1.92393000 | -0.80555300 |
| C | 4.25236600  | -2.92841400 | -1.28443600 |
| H | 4.66789800  | -3.48347700 | -0.44202900 |
| H | 3.65862400  | -3.57854600 | -1.92215300 |
| H | 5.05677100  | -2.45760200 | -1.85102600 |
| N | 2.85153000  | -0.15244200 | 0.53650700  |
| N | 2.44677900  | 0.61822800  | -0.33495100 |

**P8a**

|   |            |             |             |
|---|------------|-------------|-------------|
| C | 0.75297800 | -0.97534800 | 0.06601100  |
| O | 2.82893900 | 0.29170900  | 0.05711800  |
| C | 2.99906500 | -1.89801100 | 0.71360200  |
| C | 3.78675500 | -0.37099400 | -0.77999900 |
| O | 3.58022000 | -1.75917200 | -0.57492200 |
| C | 5.17961500 | 0.04783100  | -0.33491800 |
| C | 3.50655000 | -0.04272900 | -2.23356800 |
| C | 2.08111900 | -0.68119700 | 0.77260800  |



|   |             |             |             |
|---|-------------|-------------|-------------|
| O | -0.68775000 | -1.06655000 | 1.80360100  |
| N | -0.01523500 | -1.91738300 | 0.88196400  |
| C | -0.99668700 | -2.69142500 | 0.12143000  |
| C | -0.20294300 | 0.23759500  | -0.10911900 |
| C | -1.12769600 | 0.10579900  | 1.13276500  |
| C | 0.51722900  | 1.54194700  | -0.38612800 |
| O | 0.68147600  | 1.96620400  | -1.50652600 |
| O | 0.97019400  | 2.14848200  | 0.71031700  |
| C | 1.83046700  | 3.26593000  | 0.47344000  |
| H | 0.97526400  | -1.43862800 | -0.90083400 |
| H | 2.46455000  | -2.84811000 | 0.75780700  |
| H | 3.76030700  | -1.86148900 | 1.50272100  |
| H | 5.93421800  | -0.42937500 | -0.96559800 |
| H | 5.34724000  | -0.24227900 | 0.70594800  |
| H | 5.28518700  | 1.13315600  | -0.41577400 |
| H | 4.20299900  | -0.57945500 | -2.88317300 |
| H | 3.62336000  | 1.03170500  | -2.39783500 |
| H | 2.48215900  | -0.32560700 | -2.48793500 |
| H | 1.90360700  | -0.31716700 | 1.78880900  |
| H | -1.60440400 | -3.25862100 | 0.82765900  |
| H | -0.44270800 | -3.38769700 | -0.51246100 |
| H | -1.65920800 | -2.08275600 | -0.50995800 |
| H | -0.80553500 | 0.07379000  | -1.00412900 |
| H | 1.30631300  | 4.03651900  | -0.09421000 |
| H | 2.71101700  | 2.92929700  | -0.07826100 |
| H | 2.11062600  | 3.63750800  | 1.45723900  |
| C | -4.31286300 | 0.46037000  | -0.50049500 |
| O | -5.07749100 | 1.38718200  | -0.48832300 |
| O | -4.57180400 | -0.78165400 | -0.86943600 |
| C | -1.19448100 | 1.20970800  | 2.17996600  |
| H | -0.22140200 | 1.32837000  | 2.65391200  |
| H | -1.49570500 | 2.15253500  | 1.71977900  |
| H | -1.93512200 | 0.92305500  | 2.93159000  |
| C | -5.92468300 | -1.01802400 | -1.29472800 |

|   |             |             |             |
|---|-------------|-------------|-------------|
| H | -6.16520700 | -0.37237600 | -2.14070000 |
| H | -5.95915400 | -2.06519300 | -1.58517200 |
| H | -6.61152800 | -0.82072700 | -0.47062200 |
| N | -2.54874300 | -0.12560400 | 0.73121000  |
| N | -2.91654800 | 0.63515900  | -0.16726500 |

**P5b**

|   |             |             |             |
|---|-------------|-------------|-------------|
| C | -0.48365200 | 0.79636500  | -0.04100200 |
| C | -1.73974200 | 0.36660300  | 0.78891500  |
| C | 0.62220900  | -0.06847600 | 0.56910400  |
| O | 2.68089000  | -1.26240500 | 0.14572600  |
| C | 2.41185600  | 0.65460100  | -1.09522600 |
| C | 3.93973500  | -0.89387600 | -0.43414200 |
| O | 3.63433600  | 0.04247800  | -1.45523500 |
| C | 4.58071900  | -2.10681500 | -1.07783100 |
| C | 4.80189900  | -0.26182800 | 0.64799400  |
| C | 1.64443600  | -0.50729000 | -0.46264500 |
| O | -1.24828100 | -0.51795600 | 1.74661800  |
| N | -0.14608900 | -1.20357800 | 1.10210800  |
| C | 0.52483600  | -1.91436200 | 2.18061800  |
| C | -0.21180900 | 2.28268700  | 0.05421100  |
| O | 0.59800700  | 2.79919500  | 0.78912600  |
| O | -1.01401200 | 2.96296100  | -0.76473000 |
| C | -0.90078400 | 4.39117700  | -0.69386700 |
| H | -0.65917400 | 0.54804100  | -1.09326600 |
| H | 1.12477800  | 0.48545100  | 1.37801000  |
| H | 2.56509200  | 1.46473300  | -0.36830300 |
| H | 1.94282500  | 1.05611700  | -1.99584700 |
| H | 5.51540400  | -1.82209700 | -1.56792500 |
| H | 3.89777900  | -2.52621700 | -1.82048600 |
| H | 4.79631600  | -2.86223200 | -0.31820200 |
| H | 5.77219500  | 0.02554400  | 0.23456400  |
| H | 4.95992600  | -0.97446000 | 1.46165800  |
| H | 4.30866400  | 0.62571500  | 1.05441600  |

|   |             |             |             |
|---|-------------|-------------|-------------|
| H | 1.14418800  | -1.11118200 | -1.23344300 |
| H | -0.16604700 | -2.65357800 | 2.58960300  |
| H | 0.84998700  | -1.23072500 | 2.97788100  |
| H | 1.39240000  | -2.41877700 | 1.75534800  |
| H | 0.11417900  | 4.69917200  | -0.94984300 |
| H | -1.14499800 | 4.73447700  | 0.31337400  |
| H | -1.61518800 | 4.77924100  | -1.41620800 |
| C | -2.50397800 | 1.46842100  | 1.50496800  |
| H | -2.97046800 | 2.14098200  | 0.78314400  |
| H | -3.27995000 | 1.01257300  | 2.12496200  |
| H | -1.82091100 | 2.03340400  | 2.14427700  |
| C | -4.03293900 | -1.92134800 | -0.86677000 |
| O | -4.60726500 | -2.94464700 | -0.55843600 |
| N | -3.06062200 | -1.37661000 | 0.10888200  |
| N | -2.68830400 | -0.24131700 | -0.18199700 |
| N | -4.16568800 | -1.24429500 | -2.01567600 |
| H | -3.71086400 | -0.34956500 | -2.13246700 |
| H | -4.85732400 | -1.54816300 | -2.68498400 |

**P6b**

|   |             |             |             |
|---|-------------|-------------|-------------|
| C | -0.65470000 | 0.59684100  | 0.65794000  |
| O | -1.64864300 | -1.15445400 | -0.68943600 |
| C | -2.12840700 | -1.25976400 | 1.59445600  |
| C | -2.98188500 | -1.62539200 | -0.47741900 |
| O | -3.00123000 | -2.09604600 | 0.85710300  |
| C | -3.24128500 | -2.79306800 | -1.40522500 |
| C | -3.97151900 | -0.48240000 | -0.67293400 |
| C | -1.05138800 | -0.87440300 | 0.56832200  |
| O | 1.39793800  | 0.48328200  | 1.65084600  |
| N | 0.03294000  | 0.80558900  | 1.93419900  |
| C | -0.00120300 | 2.18759000  | 2.41120200  |
| C | 0.35928000  | 0.98792200  | -0.42696500 |
| C | 1.71192700  | 0.70093900  | 0.28407300  |
| C | 0.24331000  | 2.38524300  | -1.01624000 |

|   |             |             |             |
|---|-------------|-------------|-------------|
| O | 1.01031000  | 2.81396300  | -1.84652500 |
| O | -0.80918200 | 3.06806800  | -0.56474000 |
| C | -0.98439700 | 4.37411000  | -1.13139200 |
| H | -1.55127900 | 1.22008100  | 0.62301000  |
| H | -2.64950900 | -0.36971200 | 1.97548200  |
| H | -1.73611000 | -1.82543600 | 2.43992100  |
| H | -4.23891300 | -3.20088100 | -1.22417500 |
| H | -2.49432700 | -3.56939200 | -1.22578400 |
| H | -3.17902700 | -2.46475600 | -2.44565500 |
| H | -4.99370600 | -0.84240500 | -0.52906800 |
| H | -3.87581800 | -0.07692300 | -1.68332800 |
| H | -3.78186200 | 0.32368600  | 0.04208000  |
| H | -0.15949400 | -1.50214600 | 0.68245400  |
| H | 0.59647400  | 2.24505400  | 3.32199200  |
| H | -1.03918200 | 2.43156700  | 2.64932500  |
| H | 0.37846400  | 2.91484500  | 1.68246200  |
| H | 0.26882800  | 0.32192700  | -1.29198000 |
| H | -1.10062200 | 4.29809900  | -2.21360700 |
| H | -0.12124600 | 4.99978800  | -0.89868300 |
| H | -1.88604900 | 4.77409800  | -0.67313600 |
| C | 2.82540600  | 1.73495600  | 0.16496300  |
| H | 3.66514600  | 1.40032300  | 0.77968500  |
| H | 3.14821600  | 1.84557800  | -0.87044100 |
| H | 2.47882000  | 2.70208300  | 0.53578600  |
| C | 2.95657300  | -2.67016700 | -0.30903200 |
| O | 2.78636300  | -3.75179000 | 0.21290200  |
| N | 2.41284400  | -1.49043200 | 0.39732200  |
| N | 2.26466200  | -0.52507300 | -0.35035900 |
| N | 3.62698900  | -2.41942200 | -1.44289100 |
| H | 3.58279700  | -1.49960200 | -1.85962800 |
| H | 3.95163000  | -3.19913400 | -1.99630300 |

**P7b**

|   |            |            |             |
|---|------------|------------|-------------|
| C | 0.56388500 | 1.00607000 | -0.62465900 |
|---|------------|------------|-------------|

|   |             |             |             |
|---|-------------|-------------|-------------|
| C | 1.87876300  | 0.95233100  | 0.17719100  |
| C | -0.26948300 | -0.00726400 | 0.17833200  |
| O | -2.47966300 | -0.81835000 | 0.75726100  |
| C | -2.25441800 | -0.03953900 | -1.42787600 |
| C | -3.33776000 | -1.54749100 | -0.12614100 |
| O | -3.48164600 | -0.72183500 | -1.26659900 |
| C | -4.69500000 | -1.70652100 | 0.52537100  |
| C | -2.68748100 | -2.87847800 | -0.48207500 |
| C | -1.77437500 | 0.16782400  | 0.01969200  |
| O | 1.50106400  | 0.74757300  | 1.50359300  |
| N | 0.14806900  | 0.21709300  | 1.56757300  |
| C | 0.21089700  | -1.01468500 | 2.34791600  |
| C | -0.07837100 | 2.37901700  | -0.70638700 |
| O | -0.50273900 | 2.84781400  | -1.73784300 |
| O | -0.16254600 | 2.98891700  | 0.47512300  |
| C | -0.79147700 | 4.27847800  | 0.45763100  |
| H | 0.71700100  | 0.67504000  | -1.65344800 |
| H | 0.00321800  | -1.02210600 | -0.15949100 |
| H | -1.53612800 | -0.64154800 | -2.00344200 |
| H | -2.43694400 | 0.89689100  | -1.95671400 |
| H | -5.37514900 | -2.23038000 | -0.15105700 |
| H | -5.10249100 | -0.71967600 | 0.75579400  |
| H | -4.60171400 | -2.28432600 | 1.44801600  |
| H | -3.33786600 | -3.44938800 | -1.14995700 |
| H | -2.51398300 | -3.45908300 | 0.42774900  |
| H | -1.72523100 | -2.71984900 | -0.97758400 |
| H | -2.05958900 | 1.15475100  | 0.40516900  |
| H | 0.56800800  | -0.77420500 | 3.35124000  |
| H | 0.87013800  | -1.76240800 | 1.89024800  |
| H | -0.80863400 | -1.39860500 | 2.41181800  |
| H | -1.81168700 | 4.19093400  | 0.07978900  |
| H | -0.22380300 | 4.96193900  | -0.17619100 |
| H | -0.79004500 | 4.61881700  | 1.49049100  |
| C | 2.80241000  | 2.15665600  | 0.08938900  |

|   |            |             |             |
|---|------------|-------------|-------------|
| H | 3.70402700 | 1.96085800  | 0.67551100  |
| H | 3.08951700 | 2.33494200  | -0.94931600 |
| H | 2.29842100 | 3.03544700  | 0.49250900  |
| C | 3.46504000 | -2.28596900 | -0.35970100 |
| O | 3.31009300 | -3.39220900 | 0.11361400  |
| N | 2.74109300 | -1.17316200 | 0.29049800  |
| N | 2.63792700 | -0.18331400 | -0.43128500 |
| N | 4.25523300 | -1.95198800 | -1.38930600 |
| H | 4.71857000 | -2.68505200 | -1.90645300 |
| H | 4.20582000 | -1.02125600 | -1.78033100 |

**P8b**

|   |             |             |             |
|---|-------------|-------------|-------------|
| C | 0.53286300  | -0.99680200 | -0.12072600 |
| O | 2.53919100  | 0.34181400  | 0.19575600  |
| C | 2.77489900  | -1.91108600 | 0.55230800  |
| C | 3.58243900  | -0.15568700 | -0.65317900 |
| O | 3.43258700  | -1.56619700 | -0.65819300 |
| C | 4.91946800  | 0.25120700  | -0.05297800 |
| C | 3.38234100  | 0.36268300  | -2.06363900 |
| C | 1.79544900  | -0.75252100 | 0.71352800  |
| O | -1.01308400 | -1.39322000 | 1.47942500  |
| N | -0.23944900 | -2.07569100 | 0.49817500  |
| C | -1.13042000 | -2.76987100 | -0.43204900 |
| C | -0.46932800 | 0.18937400  | -0.19299700 |
| C | -1.46197600 | -0.15195600 | 0.95305000  |
| C | 0.20253100  | 1.54722800  | -0.24007100 |
| O | 0.41864400  | 2.12625400  | -1.27934000 |
| O | 0.55362300  | 2.01572300  | 0.95689100  |
| C | 1.37493600  | 3.18668300  | 0.93214100  |
| H | 0.84023800  | -1.30889600 | -1.12430700 |
| H | 2.28655800  | -2.87800900 | 0.42282100  |
| H | 3.47881500  | -1.95957100 | 1.39235100  |
| H | 5.73815200  | -0.09721400 | -0.68805200 |
| H | 5.03234200  | -0.18060700 | 0.94514500  |

|   |             |             |             |
|---|-------------|-------------|-------------|
| H | 4.97442000  | 1.34003700  | 0.03054500  |
| H | 4.14580500  | -0.04861600 | -2.72908900 |
| H | 3.45538700  | 1.45335900  | -2.07003200 |
| H | 2.39213600  | 0.07556900  | -2.42618900 |
| H | 1.53308800  | -0.54307600 | 1.75470600  |
| H | -1.77824800 | -3.42861400 | 0.14765300  |
| H | -0.50721500 | -3.37472600 | -1.09462100 |
| H | -1.75346900 | -2.10008500 | -1.04132700 |
| H | -1.00684600 | 0.12897300  | -1.14069000 |
| H | 0.85189400  | 4.00794700  | 0.43974000  |
| H | 2.30175800  | 2.96213200  | 0.39982700  |
| H | 1.57654400  | 3.42847100  | 1.97381300  |
| C | -4.59765600 | 0.32950800  | -0.81981400 |
| O | -5.13311100 | 1.27598900  | -1.35625900 |
| C | -1.63527200 | 0.78724700  | 2.13946100  |
| H | -0.69559500 | 0.87157500  | 2.68319200  |
| H | -1.95214000 | 1.77425900  | 1.79851400  |
| H | -2.40219200 | 0.36943700  | 2.79739000  |
| N | -2.83975000 | -0.36919000 | 0.42331300  |
| N | -3.21026800 | 0.51848900  | -0.34478200 |
| N | -5.11266300 | -0.89606500 | -0.64663900 |
| H | -6.07672300 | -1.05842400 | -0.89865600 |
| H | -4.62425100 | -1.57565700 | -0.07964600 |

### **N1-OBn**

|   |             |             |             |
|---|-------------|-------------|-------------|
| C | -3.73025000 | 0.95284800  | -0.17723300 |
| C | -2.51685200 | -1.00779500 | 0.10246100  |
| C | -1.62495400 | 0.05004800  | 0.65669900  |
| C | -2.30733200 | 1.36601900  | 0.19430300  |
| H | -4.10814700 | 1.36483500  | -1.11107800 |
| H | -4.46090100 | 1.13219700  | 0.61232200  |
| H | -2.32705800 | -2.07028000 | 0.08700000  |
| H | -2.28446300 | 2.14599700  | 0.95332100  |
| N | -3.64280700 | -0.53316700 | -0.34926500 |

|   |             |             |             |
|---|-------------|-------------|-------------|
| O | -4.62881200 | -1.15968900 | -0.84005800 |
| H | -1.57992100 | -0.01250200 | 1.75450500  |
| H | -1.77061700 | 1.71824500  | -0.68802400 |
| C | 0.66237000  | 0.68325400  | 0.81546900  |
| H | 0.48372900  | 1.74632900  | 0.61897700  |
| H | 0.57285200  | 0.52064300  | 1.89859000  |
| O | -0.31018500 | -0.12258900 | 0.14135600  |
| C | 2.02986200  | 0.28593100  | 0.33334000  |
| C | 2.50943900  | -1.00446600 | 0.58228400  |
| C | 2.83136600  | 1.18194900  | -0.37455500 |
| C | 3.76967700  | -1.38814600 | 0.13575000  |
| H | 1.88805000  | -1.70673900 | 1.12658700  |
| C | 4.09788400  | 0.80235800  | -0.81931200 |
| H | 2.46324500  | 2.18154500  | -0.57883500 |
| C | 4.56854600  | -0.48331000 | -0.56558800 |
| H | 4.13249300  | -2.38963400 | 0.33632600  |
| H | 4.71217300  | 1.50859200  | -1.36569200 |
| H | 5.55165200  | -0.78098100 | -0.91123500 |

**TS1a-OBn**

|   |             |             |             |
|---|-------------|-------------|-------------|
| C | -0.15940400 | 1.59185900  | 2.47079400  |
| C | -0.19467600 | 0.35226000  | 0.44181500  |
| C | -1.48213500 | 1.15697700  | 0.42039600  |
| C | -1.40681300 | 2.03599500  | 1.69576600  |
| H | -0.35513000 | 1.26422800  | 3.49105800  |
| H | 0.62829000  | 2.34526200  | 2.47809100  |
| H | -0.17849300 | -0.63481500 | -0.00169500 |
| H | -1.34303400 | 3.08933000  | 1.43461700  |
| C | 1.23560800  | 1.08115300  | -0.56539200 |
| H | 1.06891200  | 0.49471700  | -1.46106000 |
| C | 2.47250300  | 0.74177400  | 0.08288700  |
| N | 0.32961000  | 0.42219600  | 1.70369200  |
| O | 1.43147900  | -0.14050400 | 1.93828300  |
| H | -1.56297100 | 1.75854200  | -0.48961800 |



|   |             |             |             |
|---|-------------|-------------|-------------|
| H | -2.31854600 | 1.87149200  | 2.26731700  |
| C | 0.88541700  | 2.52270200  | -0.76014000 |
| O | 0.95052200  | 3.39261700  | 0.08164300  |
| O | 0.43597800  | 2.73121800  | -2.00588600 |
| C | 0.03407400  | 4.08479200  | -2.31855400 |
| H | 0.87057300  | 4.76749800  | -2.17350600 |
| H | -0.26779600 | 4.06051600  | -3.36152900 |
| H | -0.79937300 | 4.38379300  | -1.68298800 |
| C | 3.35657500  | 1.69551400  | 0.83173800  |
| H | 3.88893400  | 1.17095600  | 1.62243900  |
| H | 4.11105900  | 2.10803400  | 0.15074900  |
| H | 2.78498300  | 2.51967900  | 1.24632900  |
| N | 2.92333100  | -0.49327300 | -0.31897500 |
| N | 4.10837100  | -0.78861000 | 0.04160700  |
| C | 4.45404000  | -2.11044200 | -0.36396900 |
| O | 3.73894800  | -2.95956100 | -0.84213700 |
| C | -3.00657400 | -0.27058400 | -0.73806500 |
| H | -2.20912100 | -0.91184800 | -1.12952400 |
| H | -3.18082700 | 0.53588000  | -1.46184700 |
| O | -2.61666300 | 0.30628100  | 0.51746400  |
| O | 5.75850100  | -2.27727400 | -0.09933600 |
| C | 6.29816200  | -3.56890300 | -0.43560900 |
| H | 6.19168400  | -3.75899400 | -1.50428400 |
| H | 7.34801800  | -3.52727700 | -0.15826900 |
| H | 5.78465100  | -4.35182800 | 0.12367500  |
| C | -4.25775800 | -1.07145100 | -0.51520800 |
| C | -5.48164400 | -0.42065100 | -0.33175700 |
| C | -4.21212100 | -2.46467500 | -0.44786000 |
| C | -6.64089400 | -1.15155100 | -0.09007900 |
| H | -5.52191100 | 0.66203900  | -0.38036500 |
| C | -5.37201100 | -3.20044100 | -0.20916300 |
| H | -3.26489700 | -2.97511200 | -0.58405100 |
| C | -6.58776700 | -2.54460000 | -0.02923400 |
| H | -7.58537400 | -0.63797400 | 0.04720700  |

|   |             |             |             |
|---|-------------|-------------|-------------|
| H | -5.32566700 | -4.28220700 | -0.16297700 |
| H | -7.49076000 | -3.11469700 | 0.15551400  |

**TS2a-OBn**

|   |             |             |             |
|---|-------------|-------------|-------------|
| C | 0.42312900  | 1.18568600  | 2.68728600  |
| C | 0.15459400  | -0.21237700 | 0.76918900  |
| C | 1.63194100  | 0.11330000  | 0.82002100  |
| C | 1.76210500  | 1.18916000  | 1.93752300  |
| H | 0.49355200  | 0.84071000  | 3.71908200  |
| H | -0.09740900 | 2.14261500  | 2.66253200  |
| H | -0.15995200 | -1.19575300 | 0.44409400  |
| H | 1.92580700  | 2.15852400  | 1.47259500  |
| C | -0.86606000 | 0.75755800  | -0.48828600 |
| H | -0.74460800 | 0.05540800  | -1.30449800 |
| C | -2.22305000 | 0.82552100  | -0.02227800 |
| N | -0.39831600 | 0.19542500  | 1.95010200  |
| O | -1.61088500 | -0.00286500 | 2.18082600  |
| H | 2.59590600  | 0.96895500  | 2.60162900  |
| C | -0.16921900 | 2.06151200  | -0.74767100 |
| O | 0.05127000  | 2.91494600  | 0.08419200  |
| O | 0.13811600  | 2.18335800  | -2.04207200 |
| C | 0.85646600  | 3.38049600  | -2.40714800 |
| H | 0.27682900  | 4.26616200  | -2.14812000 |
| H | 1.00030900  | 3.31504300  | -3.48191200 |
| H | 1.81664100  | 3.40516800  | -1.89139200 |
| C | -2.88370800 | 2.05745300  | 0.52576000  |
| H | -3.64825500 | 1.78108800  | 1.24885300  |
| H | -3.38439200 | 2.60167100  | -0.28476300 |
| H | -2.15792800 | 2.72337500  | 0.98391900  |
| N | -2.92649600 | -0.29926000 | -0.33443300 |
| N | -4.18538100 | -0.25318900 | -0.10066100 |
| C | -4.80732500 | -1.48933200 | -0.41055600 |
| O | -4.30561300 | -2.50362100 | -0.84069400 |
| H | 2.18157200  | -0.79388600 | 1.09210100  |

|   |             |             |             |
|---|-------------|-------------|-------------|
| C | 3.46799300  | 0.70664000  | -0.59420900 |
| H | 3.59996500  | 1.12635300  | -1.59268600 |
| H | 3.83913700  | 1.43847400  | 0.13113000  |
| O | 2.05131900  | 0.54521400  | -0.46247500 |
| O | -6.11775700 | -1.35535500 | -0.13802900 |
| C | -6.92343600 | -2.51993600 | -0.38946700 |
| H | -7.93695700 | -2.23863900 | -0.11559500 |
| H | -6.87539400 | -2.79686600 | -1.44349800 |
| H | -6.58202800 | -3.35856600 | 0.21889000  |
| C | 4.21896200  | -0.59620700 | -0.45476300 |
| C | 3.86407900  | -1.69406300 | -1.24604100 |
| C | 5.25933700  | -0.72967200 | 0.46515100  |
| C | 4.54299000  | -2.90151200 | -1.12145300 |
| H | 3.04713200  | -1.59782900 | -1.95226300 |
| C | 5.94659800  | -1.93739300 | 0.58740500  |
| H | 5.53090700  | 0.11373500  | 1.09095500  |
| C | 5.58893600  | -3.02498200 | -0.20499800 |
| H | 4.26070100  | -3.74636400 | -1.73893600 |
| H | 6.75368800  | -2.02914300 | 1.30488000  |
| H | 6.11853200  | -3.96558200 | -0.10885400 |

### TS3a-OBn

|   |             |             |             |
|---|-------------|-------------|-------------|
| C | 0.92060800  | -2.34545000 | 0.15343700  |
| C | -0.13966300 | -0.30827500 | 0.66002800  |
| C | -1.05066700 | -0.97102700 | -0.34345800 |
| C | -0.46932100 | -2.40916700 | -0.48288000 |
| H | 1.20758200  | -3.22833600 | 0.72127900  |
| H | 1.72165900  | -2.09894500 | -0.55129200 |
| H | -0.53753300 | 0.37671300  | 1.39800300  |
| H | -0.43182900 | -2.74596600 | -1.51693400 |
| C | 1.07876700  | 0.95927200  | -0.24511300 |
| C | 2.28753000  | 0.97169300  | 0.50555100  |
| N | 0.79754600  | -1.19762100 | 1.08092700  |
| O | 1.78262200  | -0.78824500 | 1.76176600  |

|   |             |             |             |
|---|-------------|-------------|-------------|
| H | 1.17302100  | 0.45976600  | -1.20176300 |
| H | -1.11545900 | -3.08187200 | 0.08318000  |
| C | 0.16169800  | 2.13285100  | -0.28509700 |
| O | 0.00558300  | 2.96055200  | 0.58404700  |
| O | -0.54493900 | 2.11685700  | -1.43023700 |
| C | -1.54318300 | 3.15083500  | -1.57312400 |
| H | -2.03232000 | 2.94955400  | -2.52188600 |
| H | -1.06900100 | 4.13201200  | -1.58525800 |
| H | -2.25795300 | 3.09920800  | -0.75198400 |
| C | 2.59307500  | 1.91170600  | 1.62555900  |
| H | 3.01405000  | 2.84418600  | 1.23395300  |
| H | 3.33422700  | 1.46408800  | 2.28526400  |
| H | 1.68967600  | 2.15712100  | 2.17659400  |
| N | 3.27236400  | 0.20567000  | -0.10067800 |
| N | 4.44949400  | 0.37041300  | 0.34546400  |
| C | 5.36855900  | -0.50415500 | -0.30312300 |
| O | 5.12099800  | -1.47794000 | -0.97550100 |
| H | -1.00869500 | -0.43378900 | -1.29663100 |
| C | -3.36609200 | -1.20391500 | -0.84550700 |
| H | -3.37889300 | -2.27171900 | -1.09052600 |
| H | -3.11191800 | -0.65239000 | -1.76155400 |
| O | -2.37664000 | -0.92617500 | 0.14991400  |
| O | 6.60402500  | -0.08077700 | -0.00393900 |
| C | 7.67927900  | -0.86143500 | -0.55990700 |
| H | 7.62476100  | -0.86235100 | -1.64908500 |
| H | 8.59299000  | -0.37886600 | -0.22384800 |
| H | 7.63034300  | -1.88751300 | -0.19373000 |
| C | -4.70882300 | -0.76501100 | -0.32792200 |
| C | -4.87294300 | 0.53119800  | 0.17174400  |
| C | -5.80422400 | -1.62826000 | -0.34994200 |
| C | -6.11285000 | 0.95551400  | 0.63783300  |
| H | -4.02016100 | 1.19920500  | 0.20165800  |
| C | -7.05061500 | -1.20272700 | 0.10992300  |
| H | -5.68282300 | -2.63843200 | -0.72577400 |

|   |             |             |            |
|---|-------------|-------------|------------|
| C | -7.20685700 | 0.08903400  | 0.60567400 |
| H | -6.22884000 | 1.96158700  | 1.02413800 |
| H | -7.89432500 | -1.88265800 | 0.08786500 |
| H | -8.17323000 | 0.41988100  | 0.96789200 |

**TS4a-OBn**

|   |             |             |             |
|---|-------------|-------------|-------------|
| C | 0.77150300  | -2.62985400 | 0.01714600  |
| C | -0.35460800 | -0.66427400 | 0.71586900  |
| C | -1.30059100 | -1.33467700 | -0.24970700 |
| C | -0.41535500 | -2.40849300 | -0.93349200 |
| H | 0.72344800  | -3.56918700 | 0.56881000  |
| H | 1.75258500  | -2.54091100 | -0.45223900 |
| H | -0.71168500 | -0.03902500 | 1.52370100  |
| H | -0.07177900 | -2.00023000 | -1.88427400 |
| C | 0.68086300  | 0.74168800  | -0.19268900 |
| C | 1.89203800  | 0.88892600  | 0.53222600  |
| N | 0.65592700  | -1.51925000 | 0.99374100  |
| O | 1.62147600  | -1.15936700 | 1.71094100  |
| H | 0.81615900  | 0.30409700  | -1.17366600 |
| H | -0.96099700 | -3.32895100 | -1.13116600 |
| C | -0.33014600 | 1.85073100  | -0.18145700 |
| O | -0.94089300 | 2.23813100  | 0.79160800  |
| O | -0.46175300 | 2.37270900  | -1.40332200 |
| C | -1.44585800 | 3.42127700  | -1.54169600 |
| H | -1.37156300 | 3.75047400  | -2.57417200 |
| H | -1.22688800 | 4.24026000  | -0.85750000 |
| H | -2.44046300 | 3.02459200  | -1.33668600 |
| C | 2.07188500  | 1.80028200  | 1.70366300  |
| H | 2.58503300  | 2.71747900  | 1.39502300  |
| H | 2.69889100  | 1.31853600  | 2.45367700  |
| H | 1.11189100  | 2.06778100  | 2.13888000  |
| N | 2.94747400  | 0.23382500  | -0.05518800 |
| N | 4.10040400  | 0.50427000  | 0.42548600  |
| C | 5.10377500  | -0.28158800 | -0.19150400 |

|   |             |             |             |
|---|-------------|-------------|-------------|
| O | 4.96763400  | -1.25609200 | -0.89817300 |
| H | -2.12645400 | -1.78744700 | 0.30866100  |
| C | -3.12057300 | -0.63531700 | -1.64321000 |
| H | -3.26929200 | 0.09529900  | -2.44125100 |
| H | -3.16887900 | -1.63296700 | -2.09378400 |
| O | -1.80724900 | -0.36619600 | -1.15263500 |
| O | 6.29532500  | 0.21853300  | 0.17849500  |
| C | 7.44524700  | -0.47818000 | -0.33349500 |
| H | 7.45294000  | -0.45361700 | -1.42398200 |
| H | 8.30756900  | 0.05001800  | 0.06484900  |
| H | 7.44303800  | -1.51551700 | 0.00369500  |
| C | -4.18993400 | -0.48538300 | -0.58319000 |
| C | -5.30589800 | -1.32411000 | -0.58347600 |
| C | -4.08523400 | 0.50911700  | 0.39477100  |
| C | -6.31249200 | -1.16512000 | 0.36783100  |
| H | -5.38702000 | -2.10793300 | -1.32925300 |
| C | -5.08625800 | 0.66274000  | 1.35030100  |
| H | -3.21391400 | 1.15222100  | 0.41639700  |
| C | -6.20439700 | -0.17095600 | 1.33788600  |
| H | -7.17352300 | -1.82334900 | 0.35698600  |
| H | -4.99347300 | 1.43397500  | 2.10641500  |
| H | -6.98236400 | -0.05008200 | 2.08263500  |

**TS1b-OBn**

|   |             |             |             |
|---|-------------|-------------|-------------|
| C | 0.40103600  | 1.23264300  | 2.50998400  |
| C | 0.03981600  | 0.18313800  | 0.42518700  |
| C | -1.08539500 | 1.19284300  | 0.53120000  |
| C | -0.82420700 | 1.90982800  | 1.88072800  |
| H | 0.24819500  | 0.89272700  | 3.53332700  |
| H | 1.29312400  | 1.85712000  | 2.46587100  |
| H | -0.10261000 | -0.73124000 | -0.13508300 |
| H | -0.64601700 | 2.97195300  | 1.72964700  |
| C | 1.61080600  | 0.78818700  | -0.57213500 |
| H | 1.36098600  | 0.29363900  | -1.50251500 |

|   |             |             |             |
|---|-------------|-------------|-------------|
| C | 2.73918400  | 0.19812100  | 0.08783100  |
| N | 0.61852300  | 0.04619400  | 1.65051800  |
| O | 1.69320700  | -0.64669900 | 1.72066400  |
| H | -1.07661400 | 1.88719500  | -0.31373600 |
| H | -1.71421400 | 1.78898500  | 2.49631600  |
| C | 1.46693300  | 2.26559600  | -0.65380100 |
| O | 1.71194800  | 3.06730600  | 0.22410600  |
| O | 0.96285700  | 2.62083800  | -1.84959500 |
| C | 0.73537200  | 4.03313300  | -2.04873800 |
| H | 1.67069000  | 4.58302800  | -1.94755400 |
| H | 0.34494500  | 4.12171300  | -3.05858300 |
| H | 0.01190400  | 4.40514900  | -1.32310800 |
| C | 3.79182500  | 0.94725500  | 0.85279100  |
| H | 4.22814600  | 0.30797800  | 1.61730200  |
| H | 4.59855500  | 1.24004200  | 0.17038200  |
| H | 3.38195200  | 1.84476700  | 1.30447300  |
| N | 3.02389000  | -1.06302500 | -0.45981800 |
| N | 4.14073500  | -1.54114600 | -0.14713400 |
| C | 4.34109500  | -2.86987800 | -0.72121400 |
| O | 3.53686500  | -3.48460400 | -1.39431800 |
| N | 5.57131300  | -3.30081000 | -0.37500300 |
| H | 5.89483900  | -4.20483800 | -0.67778000 |
| H | 6.16632600  | -2.71942900 | 0.19192700  |
| C | -2.87048400 | 0.17787100  | -0.68958000 |
| H | -2.13763200 | -0.44135400 | -1.22243400 |
| H | -3.05170300 | 1.07650100  | -1.29082400 |
| O | -2.35403800 | 0.55006100  | 0.59424300  |
| C | -4.14417300 | -0.59314800 | -0.48112900 |
| C | -5.36703100 | -0.09905500 | -0.93530700 |
| C | -4.11240900 | -1.81982900 | 0.19083500  |
| C | -6.54268700 | -0.82182200 | -0.73203000 |
| H | -5.40076600 | 0.85485900  | -1.45015200 |
| C | -5.28382200 | -2.53990000 | 0.40051100  |
| H | -3.16502700 | -2.20430600 | 0.55175200  |

|   |             |             |             |
|---|-------------|-------------|-------------|
| C | -6.50294600 | -2.04245800 | -0.06311200 |
| H | -7.48662500 | -0.42907700 | -1.09166100 |
| H | -5.24848600 | -3.48954200 | 0.92176100  |
| H | -7.41537800 | -2.60470600 | 0.09780200  |

**TS2b-OBn**

|   |             |             |             |
|---|-------------|-------------|-------------|
| C | -0.10185600 | 0.75708200  | 2.68466800  |
| C | -0.08267300 | -0.47816100 | 0.65648200  |
| C | 1.33605200  | 0.02020300  | 0.81707800  |
| C | 1.27135200  | 0.98750000  | 2.03386300  |
| H | -0.04704600 | 0.38067900  | 3.70611500  |
| H | -0.74236500 | 1.63865200  | 2.66065500  |
| H | -0.25927600 | -1.43196400 | 0.17631100  |
| H | 1.34150300  | 2.01007900  | 1.66896400  |
| C | -1.23856000 | 0.54491800  | -0.49780700 |
| H | -1.11498800 | -0.06826600 | -1.38206200 |
| C | -2.55703600 | 0.44224300  | 0.06193600  |
| N | -0.72287400 | -0.29381000 | 1.84451900  |
| O | -1.96250200 | -0.57223300 | 1.90542200  |
| H | 2.08724900  | 0.80261800  | 2.73056500  |
| C | -0.64663600 | 1.90709500  | -0.66110800 |
| O | -0.52511800 | 2.73674800  | 0.21620800  |
| O | -0.28431700 | 2.11922400  | -1.93336500 |
| C | 0.37576300  | 3.37364500  | -2.19385800 |
| H | -0.27984700 | 4.20877400  | -1.94706300 |
| H | 0.60430800  | 3.36651000  | -3.25610700 |
| H | 1.29036900  | 3.43987500  | -1.60411600 |
| C | -3.31548900 | 1.57043800  | 0.69940000  |
| H | -4.00964800 | 1.18609000  | 1.44369900  |
| H | -3.90863700 | 2.09199000  | -0.06173600 |
| H | -2.63772600 | 2.28516700  | 1.15624500  |
| N | -3.21973600 | -0.68832800 | -0.40974900 |
| N | -4.45763500 | -0.72455700 | -0.17827200 |
| H | 1.98754900  | -0.83332500 | 1.03488200  |



|   |             |             |             |
|---|-------------|-------------|-------------|
| C | 3.14334400  | 0.97024200  | -0.42340600 |
| H | 3.26847600  | 1.51638500  | -1.35992000 |
| H | 3.38757600  | 1.65147900  | 0.39881900  |
| O | 1.75503600  | 0.62527100  | -0.39452600 |
| C | -5.06058000 | -1.96239200 | -0.64896000 |
| O | -4.47079900 | -2.90649300 | -1.14093700 |
| N | -6.39325500 | -1.89642900 | -0.44066800 |
| H | -6.98436300 | -2.66870400 | -0.70036600 |
| H | -6.79606500 | -1.07618400 | -0.01869600 |
| C | 4.04742000  | -0.23915600 | -0.38547300 |
| C | 5.05830400  | -0.35085900 | 0.56949800  |
| C | 3.87118600  | -1.27054100 | -1.31425000 |
| C | 5.89234200  | -1.46892400 | 0.59163200  |
| H | 5.19284600  | 0.43969500  | 1.30011700  |
| C | 4.69686200  | -2.38946700 | -1.29053700 |
| H | 3.07798500  | -1.19357900 | -2.04938200 |
| C | 5.71253800  | -2.48986300 | -0.33792800 |
| H | 6.67490600  | -1.54408900 | 1.33767300  |
| H | 4.55260300  | -3.18295900 | -2.01467900 |
| H | 6.35669600  | -3.36121100 | -0.32051500 |

**TS3b--OBn**

|   |             |             |             |
|---|-------------|-------------|-------------|
| C | 0.45971800  | -1.91157600 | -0.53356200 |
| C | 0.06758600  | 0.19529400  | 0.46940800  |
| C | -0.92620800 | 0.11784100  | -0.65720100 |
| C | -0.41407100 | -1.08699300 | -1.49084900 |
| H | 0.00804900  | -2.85033300 | -0.21342000 |
| H | 1.46493200  | -2.10344100 | -0.91291500 |
| H | -0.14065700 | 0.77773300  | 1.35801500  |
| H | 0.18064500  | -0.73068700 | -2.33192600 |
| C | 1.72329800  | 1.12619400  | -0.09286400 |
| C | 2.78098700  | 0.52225000  | 0.64542800  |
| N | 0.60971400  | -1.03425200 | 0.65335300  |
| O | 1.60144300  | -1.15051600 | 1.43808400  |

|   |             |             |             |
|---|-------------|-------------|-------------|
| H | 1.73170300  | 0.86610200  | -1.14406300 |
| H | -1.24997000 | -1.65921700 | -1.88985400 |
| C | 1.29583400  | 2.52980000  | 0.15536300  |
| O | 1.28132700  | 3.10513300  | 1.22088200  |
| O | 0.85473200  | 3.08176300  | -0.99055000 |
| C | 0.34508300  | 4.42883000  | -0.88835700 |
| H | 0.03285900  | 4.69565100  | -1.89407900 |
| H | 1.12714000  | 5.10184400  | -0.53738600 |
| H | -0.50049300 | 4.45990100  | -0.20118100 |
| C | 3.30803800  | 1.01938700  | 1.95211100  |
| H | 4.07286100  | 1.78647100  | 1.78766600  |
| H | 3.77444900  | 0.19798700  | 2.49358100  |
| H | 2.51009700  | 1.45982400  | 2.54323500  |
| N | 3.48556700  | -0.39821600 | -0.12936300 |
| N | 4.60237200  | -0.76550700 | 0.32773800  |
| C | 5.21361000  | -1.77578500 | -0.51239000 |
| O | 4.65789700  | -2.40005000 | -1.40024800 |
| N | 6.49846400  | -1.94607000 | -0.13207700 |
| H | 7.07898900  | -2.62095800 | -0.60169600 |
| H | 6.87624500  | -1.39887200 | 0.62355100  |
| H | -0.94173700 | 1.04299900  | -1.24036900 |
| C | -3.28972200 | 0.16029500  | -0.95706600 |
| H | -3.12796700 | -0.35670900 | -1.91291300 |
| H | -3.34279300 | 1.23533900  | -1.16765600 |
| O | -2.20295200 | -0.11043300 | -0.07142600 |
| C | -4.57107100 | -0.32010300 | -0.32951700 |
| C | -5.74182300 | 0.43062400  | -0.44866000 |
| C | -4.61167800 | -1.54054700 | 0.35121800  |
| C | -6.93977400 | -0.03483200 | 0.09161600  |
| H | -5.71722900 | 1.38458000  | -0.96451000 |
| C | -5.80530600 | -2.00245800 | 0.89853600  |
| H | -3.70136600 | -2.11732300 | 0.45779900  |
| C | -6.97428600 | -1.25256200 | 0.76742100  |
| H | -7.84174800 | 0.55784800  | -0.00792200 |

|   |             |             |            |
|---|-------------|-------------|------------|
| H | -5.82435600 | -2.94847700 | 1.42742100 |
| H | -7.90334300 | -1.61307900 | 1.19332800 |

**TS4b-OBn**

|   |             |             |             |
|---|-------------|-------------|-------------|
| C | 1.06350500  | -2.64399000 | 0.08172500  |
| C | -0.06950700 | -0.67474500 | 0.74207200  |
| C | -1.01670000 | -1.35928900 | -0.21061900 |
| C | -0.13917600 | -2.46111900 | -0.86055700 |
| H | 1.04916400  | -3.58352600 | 0.63455100  |
| H | 2.03472000  | -2.52811900 | -0.40284500 |
| H | -0.42579800 | -0.02105700 | 1.52758500  |
| H | 0.19105900  | -2.09340000 | -1.83233000 |
| C | 1.00124100  | 0.68982300  | -0.19513800 |
| C | 2.22693300  | 0.78506200  | 0.51518200  |
| N | 0.92954000  | -1.53028000 | 1.05136800  |
| O | 1.91205900  | -1.12289500 | 1.73497000  |
| H | 1.10617000  | 0.24372800  | -1.17607200 |
| H | -0.68795600 | -3.38859000 | -1.01244600 |
| C | 0.03743700  | 1.83502100  | -0.17766200 |
| O | -0.53379400 | 2.26357700  | 0.80323300  |
| O | -0.11780900 | 2.33779000  | -1.40696200 |
| C | -1.07340200 | 3.41257400  | -1.53566200 |
| H | -1.02176900 | 3.72038800  | -2.57621300 |
| H | -0.80954200 | 4.23762400  | -0.87486700 |
| H | -2.07326900 | 3.05154700  | -1.29301700 |
| C | 2.47382200  | 1.72154000  | 1.65403100  |
| H | 2.98061700  | 2.62576600  | 1.29944600  |
| H | 3.12810800  | 1.24990100  | 2.38656900  |
| H | 1.53708000  | 2.01008700  | 2.12507700  |
| N | 3.25952800  | 0.10565100  | -0.11321100 |
| N | 4.42391600  | 0.36135700  | 0.31263400  |
| C | 5.42147600  | -0.43943200 | -0.35878800 |
| O | 5.20723400  | -1.38339900 | -1.10169600 |
| N | 6.65094100  | 0.00432600  | -0.01173600 |

|   |             |             |             |
|---|-------------|-------------|-------------|
| H | 7.47233900  | -0.44678600 | -0.37850000 |
| H | 6.74496000  | 0.78170000  | 0.62044000  |
| H | -1.85270800 | -1.78766400 | 0.35173700  |
| C | -2.82234000 | -0.66872200 | -1.62571900 |
| H | -2.95654700 | 0.03368100  | -2.45140300 |
| H | -2.88970900 | -1.68169100 | -2.03866500 |
| O | -1.50651800 | -0.40679600 | -1.14161400 |
| C | -3.89209800 | -0.45801600 | -0.57602600 |
| C | -3.75856500 | 0.55180700  | 0.38235200  |
| C | -5.03820600 | -1.25508400 | -0.56812400 |
| C | -4.76033400 | 0.76165500  | 1.32653200  |
| H | -2.86456800 | 1.16318400  | 0.39768300  |
| C | -6.04520500 | -1.04002700 | 0.37144200  |
| H | -5.14277300 | -2.05076700 | -1.29828100 |
| C | -5.90813300 | -0.03061200 | 1.32202800  |
| H | -4.64471600 | 1.54444700  | 2.06748000  |
| H | -6.92959400 | -1.66662800 | 0.36700000  |
| H | -6.68661200 | 0.13389600  | 2.05782400  |

**P1a-OBn**

|   |             |             |             |
|---|-------------|-------------|-------------|
| C | -0.74002300 | -2.03321700 | -1.63735300 |
| C | -0.21350400 | -0.02335100 | -0.41106100 |
| C | -1.34187100 | -0.77222100 | 0.30691300  |
| C | -1.18260800 | -2.21689900 | -0.18110400 |
| H | -1.60576000 | -2.00630500 | -2.30101900 |
| H | -0.05719900 | -2.79870200 | -2.00148500 |
| H | -0.51207700 | 1.01353300  | -0.55386200 |
| H | -0.42038700 | -2.70926900 | 0.42344500  |
| C | 1.20902900  | -0.04912300 | 0.23196400  |
| H | 1.59669800  | 0.96597000  | 0.19897900  |
| C | 2.06107700  | -0.88569100 | -0.75044700 |
| N | -0.07377000 | -0.69852300 | -1.72789600 |
| O | 1.32987800  | -0.81730000 | -1.98810900 |
| H | -1.28362100 | -0.68212100 | 1.39576500  |

|   |             |             |             |
|---|-------------|-------------|-------------|
| H | -2.10524000 | -2.78979500 | -0.08987200 |
| C | 1.23430000  | -0.47254600 | 1.68199000  |
| O | 1.10621000  | -1.60220500 | 2.09700800  |
| O | 1.37685400  | 0.59574000  | 2.47693000  |
| C | 1.37224300  | 0.33506700  | 3.89831900  |
| H | 2.20596600  | -0.31553800 | 4.16185100  |
| H | 1.48024900  | 1.30777900  | 4.36951100  |
| H | 0.43343600  | -0.13392900 | 4.19220600  |
| C | 2.42959300  | -2.32346700 | -0.39343800 |
| H | 2.99829000  | -2.74189600 | -1.22548000 |
| H | 3.03879900  | -2.35248000 | 0.50903800  |
| H | 1.54122400  | -2.92746700 | -0.23295400 |
| N | 3.34363200  | -0.22033100 | -1.08820300 |
| N | 3.91799000  | 0.23396900  | -0.09442800 |
| C | 5.21178500  | 0.79921100  | -0.37644800 |
| O | 6.22639100  | 0.21152700  | -0.11461000 |
| C | -3.70782800 | -0.57632600 | 0.58590400  |
| H | -3.93158100 | -1.63585800 | 0.42146400  |
| H | -3.51131900 | -0.43985700 | 1.65928300  |
| O | -2.55379400 | -0.17589900 | -0.15179200 |
| O | 5.08298300  | 2.02848400  | -0.84416600 |
| C | 6.31980400  | 2.75768200  | -1.05967600 |
| H | 6.90169500  | 2.27204700  | -1.84184300 |
| H | 6.01268100  | 3.75229500  | -1.36749100 |
| H | 6.89315400  | 2.79530100  | -0.13446500 |
| C | -4.87595200 | 0.26904800  | 0.15390300  |
| C | -6.05977200 | -0.32048200 | -0.29019500 |
| C | -4.78772200 | 1.66438000  | 0.20097200  |
| C | -7.14543600 | 0.46759800  | -0.67265600 |
| H | -6.13329300 | -1.40152100 | -0.33894600 |
| C | -5.86628800 | 2.45308500  | -0.18620900 |
| H | -3.86751400 | 2.12722100  | 0.53792000  |
| C | -7.05014800 | 1.85578600  | -0.62245500 |
| H | -8.05963700 | -0.00311500 | -1.01513800 |

|   |             |            |             |
|---|-------------|------------|-------------|
| H | -5.78705700 | 3.53338400 | -0.14624700 |
| H | -7.89072100 | 2.47054200 | -0.92260300 |

**P2a-OBn**

|   |             |             |             |
|---|-------------|-------------|-------------|
| C | 0.42793500  | -0.92992100 | 2.90526900  |
| C | 0.56829900  | 0.37643400  | 0.88431300  |
| C | -0.73944200 | 0.75646800  | 1.61495800  |
| C | -0.98620800 | -0.39244400 | 2.60809300  |
| H | 0.74213000  | -0.73357600 | 3.93080400  |
| H | 0.49352900  | -1.99877300 | 2.70880400  |
| H | 1.05842700  | 1.28924300  | 0.54146600  |
| H | -1.59382400 | -1.17818100 | 2.16499800  |
| C | 0.68863000  | -0.61653900 | -0.30321800 |
| H | 0.66565700  | -0.08147800 | -1.24943600 |
| C | 2.13454100  | -1.11976500 | -0.02228800 |
| N | 1.35848000  | -0.20598000 | 1.98390000  |
| O | 2.25305400  | -1.18618000 | 1.37387700  |
| H | -1.49401600 | -0.02633700 | 3.50032900  |
| C | -0.25305800 | -1.79508500 | -0.40508400 |
| O | -0.55833000 | -2.54841000 | 0.49072900  |
| O | -0.68072800 | -1.93675900 | -1.66782100 |
| C | -1.57556800 | -3.04379000 | -1.91853500 |
| H | -1.10184900 | -3.98246900 | -1.63371500 |
| H | -1.77215400 | -3.01778800 | -2.98631600 |
| H | -2.49918000 | -2.91041500 | -1.35494900 |
| C | 2.54983000  | -2.45494500 | -0.62049600 |
| H | 3.58309300  | -2.66424700 | -0.33935700 |
| H | 2.48264200  | -2.41808200 | -1.70775300 |
| H | 1.91144000  | -3.24987200 | -0.23839700 |
| N | 3.01982600  | -0.09400100 | -0.66476300 |
| N | 3.72213100  | 0.53303600  | 0.13149800  |
| C | 4.50644500  | 1.56230600  | -0.49518900 |
| O | 4.11794400  | 2.69801200  | -0.56991200 |
| H | -0.47378600 | 1.64198800  | 2.19620100  |

|   |             |             |             |
|---|-------------|-------------|-------------|
| C | -2.47811400 | 0.29701000  | -0.03866900 |
| H | -1.92777200 | 0.21263500  | -0.98015900 |
| H | -2.52746000 | -0.69805700 | 0.41495300  |
| O | -1.82918900 | 1.21233200  | 0.83818700  |
| O | 5.68802700  | 1.08688400  | -0.84995700 |
| C | 6.62422900  | 2.05629600  | -1.38915300 |
| H | 6.79108100  | 2.85210800  | -0.66449300 |
| H | 7.53770200  | 1.49840400  | -1.57020600 |
| H | 6.23290100  | 2.47106600  | -2.31715900 |
| C | -3.87979400 | 0.77522000  | -0.32161900 |
| C | -4.62610800 | 1.43795800  | 0.65510600  |
| C | -4.46329800 | 0.51331800  | -1.56326200 |
| C | -5.93777500 | 1.82741300  | 0.39405100  |
| H | -4.16933500 | 1.65346300  | 1.61260600  |
| C | -5.77783900 | 0.89552100  | -1.82282700 |
| H | -3.88509700 | 0.00951700  | -2.33084800 |
| C | -6.51899600 | 1.55499700  | -0.84387100 |
| H | -6.50738000 | 2.34422700  | 1.15804300  |
| H | -6.21873500 | 0.68665000  | -2.79070300 |
| H | -7.53956300 | 1.85885000  | -1.04546700 |

**P3a-OBn**

|   |             |             |            |
|---|-------------|-------------|------------|
| C | -1.25608700 | -1.18339700 | 2.52711100 |
| C | 0.10585800  | 0.28232800  | 1.18453600 |
| C | 0.24984500  | -1.16902300 | 0.68399500 |
| C | -0.09768700 | -1.98923400 | 1.93115700 |
| H | -1.38892000 | -1.35138400 | 3.59595700 |
| H | -2.19142700 | -1.40749000 | 2.01378300 |
| H | 1.05231000  | 0.63727800  | 1.59117400 |
| H | -0.38573900 | -3.01322100 | 1.69318000 |
| C | -0.41839200 | 1.27832600  | 0.15036500 |
| C | -1.94272300 | 1.31340600  | 0.46521000 |
| N | -0.89074900 | 0.24357100  | 2.28755300 |
| O | -2.05779500 | 0.98949100  | 1.82812500 |

|   |             |             |             |
|---|-------------|-------------|-------------|
| H | -0.49881400 | -1.37001100 | -0.08431700 |
| H | -0.26363600 | 0.89719000  | -0.85556900 |
| H | 0.74729500  | -2.01931600 | 2.62230600  |
| C | 0.20501900  | 2.65564300  | 0.31735200  |
| O | 0.53920000  | 3.09202100  | 1.39200800  |
| O | 0.35062800  | 3.43214300  | -0.77034100 |
| C | 0.10171900  | 2.94587000  | -2.10726300 |
| H | 0.24701600  | 3.80815800  | -2.75220700 |
| H | 0.81745400  | 2.16661100  | -2.37135000 |
| H | -0.91822600 | 2.57846800  | -2.21818800 |
| C | -2.68615000 | 2.62438300  | 0.23709600  |
| H | -2.68240200 | 2.90509600  | -0.81558900 |
| H | -3.72157200 | 2.49669400  | 0.55604800  |
| H | -2.22943500 | 3.41490700  | 0.83117200  |
| N | -2.55575800 | 0.33524900  | -0.49188300 |
| N | -3.20507400 | -0.56798200 | 0.03762100  |
| C | -3.71504600 | -1.52624000 | -0.90773400 |
| O | -3.09553000 | -2.51802900 | -1.19039300 |
| C | 2.65353600  | -1.46410700 | 0.84430300  |
| H | 2.56594600  | -0.76613800 | 1.68497300  |
| H | 2.78758400  | -2.46600500 | 1.26597100  |
| O | 1.48122800  | -1.42519400 | 0.02951000  |
| O | -4.93191500 | -1.19149900 | -1.29209600 |
| C | -5.60776700 | -2.13864200 | -2.16201500 |
| H | -5.66794600 | -3.11015600 | -1.67370600 |
| H | -6.59704800 | -1.72105700 | -2.32039600 |
| H | -5.06724200 | -2.22389000 | -3.10362600 |
| C | 3.85047400  | -1.08624500 | 0.00914900  |
| C | 3.77635100  | -0.02766500 | -0.90105100 |
| C | 5.06064100  | -1.76451900 | 0.16319400  |
| C | 4.89587200  | 0.34909700  | -1.63737700 |
| H | 2.83576300  | 0.49145800  | -1.03594300 |
| C | 6.18459200  | -1.38527900 | -0.56948000 |
| H | 5.12419600  | -2.59537500 | 0.85780500  |



|   |            |             |             |
|---|------------|-------------|-------------|
| C | 6.10489200 | -0.32716200 | -1.47207500 |
| H | 4.82590700 | 1.17091100  | -2.34084100 |
| H | 7.11776800 | -1.92139200 | -0.44076500 |
| H | 6.97602400 | -0.03390200 | -2.04625000 |

**P4a-OBn**

|   |             |             |             |
|---|-------------|-------------|-------------|
| C | 1.95037600  | -1.27882900 | 2.19378800  |
| C | 0.59181900  | 0.64387900  | 1.68137700  |
| C | -0.29965900 | -0.60029100 | 1.81959600  |
| C | 0.66268200  | -1.75845300 | 1.51786100  |
| H | 1.97282100  | -1.58411200 | 3.24250300  |
| H | 2.86363100  | -1.62328700 | 1.71491800  |
| H | 0.22835900  | 1.48283800  | 2.27107300  |
| H | 0.78594900  | -1.85275400 | 0.43558800  |
| C | 0.77579700  | 1.08497500  | 0.21739200  |
| C | 2.29941000  | 0.92190100  | -0.03616900 |
| N | 1.92464200  | 0.21788600  | 2.17599100  |
| O | 2.88333900  | 0.76239000  | 1.24446700  |
| H | 0.23498500  | 0.43586100  | -0.46672500 |
| H | 0.31806500  | -2.71632800 | 1.90772200  |
| C | 0.28974100  | 2.49963200  | -0.02368000 |
| O | 0.20238100  | 3.36586300  | 0.81498700  |
| O | -0.01933400 | 2.67593500  | -1.31422700 |
| C | -0.44699700 | 4.00349200  | -1.69261300 |
| H | -0.64890500 | 3.94847500  | -2.75846400 |
| H | 0.34362400  | 4.72492600  | -1.48683800 |
| H | -1.34728800 | 4.27762600  | -1.14326100 |
| C | 3.02413900  | 2.06425400  | -0.73491100 |
| H | 2.64883600  | 2.19493400  | -1.74919700 |
| H | 4.08905100  | 1.83073500  | -0.77602300 |
| H | 2.88235700  | 2.98714300  | -0.17241700 |
| N | 2.43259400  | -0.26062600 | -0.94860100 |
| N | 3.30554500  | -1.06340800 | -0.62263500 |
| C | 3.35896800  | -2.22059500 | -1.52988400 |

|   |             |             |             |
|---|-------------|-------------|-------------|
| O | 2.36409100  | -2.81414200 | -1.89041800 |
| N | 4.63535300  | -2.53176300 | -1.80220900 |
| H | 4.84522100  | -3.31213100 | -2.40397700 |
| H | 5.39066800  | -1.98978500 | -1.41416800 |
| H | -0.66188600 | -0.67542300 | 2.85353400  |
| C | -2.39391500 | -1.48111300 | 1.09522900  |
| H | -2.00817300 | -2.45338000 | 0.76971200  |
| H | -2.66025200 | -1.56730200 | 2.15873100  |
| O | -1.40109400 | -0.46943300 | 0.94265100  |
| C | -3.60291900 | -1.10160200 | 0.28128400  |
| C | -4.08235700 | 0.21184100  | 0.30245900  |
| C | -4.27126200 | -2.05588100 | -0.48684500 |
| C | -5.21285900 | 0.56144000  | -0.42997700 |
| H | -3.55725000 | 0.95714400  | 0.88715100  |
| C | -5.40914800 | -1.70952200 | -1.21474400 |
| H | -3.89866400 | -3.07406600 | -0.51961300 |
| C | -5.88189300 | -0.39962400 | -1.18880000 |
| H | -5.57370600 | 1.58339900  | -0.40914600 |
| H | -5.91851900 | -2.46007800 | -1.80800400 |
| H | -6.76246300 | -0.12700100 | -1.75878100 |

**P1b-OBn**

|   |             |             |             |
|---|-------------|-------------|-------------|
| C | -0.45354500 | -2.31919900 | 1.04893300  |
| C | 0.00836700  | -0.36352800 | -0.28737300 |
| C | -1.03822500 | -0.01250900 | 0.77600600  |
| C | -0.82077000 | -1.07245400 | 1.86213500  |
| H | -1.34758600 | -2.89612800 | 0.80667100  |
| H | 0.25641400  | -2.98403100 | 1.53769100  |
| H | -0.36273700 | -0.04982100 | -1.26135400 |
| H | -0.00660800 | -0.74742800 | 2.51036800  |
| C | 1.45833900  | 0.18437200  | -0.10624100 |
| H | 1.78152100  | 0.56957400  | -1.06966200 |
| C | 2.31380800  | -1.07284000 | 0.18051300  |
| N | 0.12862600  | -1.84510300 | -0.24317900 |

|   |             |             |             |
|---|-------------|-------------|-------------|
| O | 1.52336500  | -2.15359000 | -0.35000100 |
| H | -0.93238400 | 1.00895700  | 1.15262100  |
| H | -1.70576700 | -1.21900100 | 2.48121500  |
| C | 1.58614700  | 1.32135500  | 0.87937800  |
| O | 1.51608800  | 1.22897100  | 2.08427600  |
| O | 1.75050600  | 2.48511400  | 0.23629300  |
| C | 1.84246100  | 3.66199600  | 1.06943400  |
| H | 2.70998400  | 3.58937500  | 1.72518800  |
| H | 1.95054300  | 4.49489700  | 0.38058100  |
| H | 0.93833000  | 3.77093400  | 1.66809700  |
| C | 2.76830300  | -1.36159000 | 1.61032600  |
| H | 3.32595800  | -2.29952200 | 1.60317800  |
| H | 3.41113300  | -0.56340700 | 1.97896000  |
| H | 1.91832900  | -1.46127200 | 2.27897100  |
| N | 3.54343800  | -1.11774700 | -0.64087900 |
| N | 4.13646600  | -0.03855800 | -0.66163400 |
| C | 5.39712200  | -0.10034500 | -1.44632200 |
| O | 5.87607000  | -1.11367400 | -1.90159100 |
| N | 5.88331400  | 1.14708400  | -1.53738700 |
| H | 6.73457500  | 1.32476500  | -2.04622300 |
| H | 5.38751800  | 1.91294500  | -1.11009100 |
| C | -3.39556400 | 0.38602200  | 0.88157300  |
| H | -3.54428600 | -0.17901100 | 1.80785400  |
| H | -3.16929900 | 1.42648700  | 1.15095100  |
| O | -2.30333400 | -0.15019900 | 0.12987900  |
| C | -4.62954600 | 0.31479700  | 0.02566500  |
| C | -5.59481500 | -0.67001000 | 0.24084200  |
| C | -4.80144300 | 1.21552500  | -1.02986500 |
| C | -6.71945000 | -0.75141700 | -0.57940800 |
| H | -5.46524500 | -1.37549100 | 1.05451100  |
| C | -5.92123300 | 1.13646200  | -1.85214000 |
| H | -4.05317500 | 1.98115800  | -1.20362700 |
| C | -6.88382500 | 0.15150400  | -1.62741900 |
| H | -7.46414500 | -1.51835800 | -0.40081200 |

|   |             |            |             |
|---|-------------|------------|-------------|
| H | -6.04659800 | 1.84226400 | -2.66508600 |
| H | -7.75774400 | 0.09053700 | -2.26551000 |

**P2b-OBn**

|   |             |             |             |
|---|-------------|-------------|-------------|
| C | -0.91615700 | -0.11730200 | 2.91942400  |
| C | -0.85792300 | -0.72626300 | 0.58860300  |
| C | 0.42834100  | -1.25984200 | 1.25933200  |
| C | 0.54452200  | -0.47073800 | 2.57469400  |
| H | -1.27360000 | -0.63911400 | 3.80767700  |
| H | -1.03963400 | 0.95538200  | 3.05905100  |
| H | -1.26646600 | -1.50621800 | -0.05593000 |
| H | 1.12120000  | 0.44109300  | 2.44046300  |
| C | -0.97417900 | 0.58191900  | -0.23738800 |
| H | -0.86341400 | 0.37313700  | -1.29859900 |
| C | -2.46417000 | 0.91089200  | 0.07653200  |
| N | -1.74552000 | -0.55459400 | 1.75283500  |
| O | -2.66419900 | 0.52802700  | 1.41401700  |
| H | 1.02584700  | -1.07442300 | 3.34408000  |
| C | -0.10380000 | 1.77073500  | 0.10183800  |
| O | 0.11243200  | 2.20988400  | 1.20798000  |
| O | 0.37518000  | 2.32748200  | -1.02011400 |
| C | 1.21399400  | 3.49172800  | -0.84709200 |
| H | 0.67718600  | 4.26512700  | -0.29917200 |
| H | 1.45346200  | 3.82503400  | -1.85262400 |
| H | 2.12122600  | 3.21919800  | -0.30721300 |
| C | -2.91530500 | 2.35461000  | -0.09212600 |
| H | -3.97294500 | 2.42920900  | 0.16531900  |
| H | -2.78270000 | 2.67233400  | -1.12605800 |
| H | -2.34382500 | 3.00284700  | 0.57028100  |
| N | -3.24671400 | 0.12474700  | -0.92562100 |
| N | -3.94958700 | -0.76159400 | -0.44345200 |
| C | -4.70252000 | -1.50306900 | -1.49190500 |
| O | -4.74789800 | -1.19780500 | -2.66233100 |
| N | -5.30965000 | -2.54245000 | -0.89785900 |

|   |             |             |             |
|---|-------------|-------------|-------------|
| H | -5.86870700 | -3.18268000 | -1.43870200 |
| H | -5.20061100 | -2.68714200 | 0.09303800  |
| H | 0.18752400  | -2.29355200 | 1.51638200  |
| C | 2.22860400  | -0.23176700 | -0.03335800 |
| H | 1.71538400  | 0.14008500  | -0.92504400 |
| H | 2.21418800  | 0.56153900  | 0.72111600  |
| O | 1.58683200  | -1.40215300 | 0.46104600  |
| C | 3.66106800  | -0.54785700 | -0.38322200 |
| C | 4.38207600  | -1.51471200 | 0.31992300  |
| C | 4.29592500  | 0.16922400  | -1.40025100 |
| C | 5.71930500  | -1.75683300 | 0.01247400  |
| H | 3.88680100  | -2.07947800 | 1.09920500  |
| C | 5.63520400  | -0.06622900 | -1.70274400 |
| H | 3.73807500  | 0.91374000  | -1.95877600 |
| C | 6.35110300  | -1.03207200 | -0.99698100 |
| H | 6.26879000  | -2.51250000 | 0.56226900  |
| H | 6.11593000  | 0.49703500  | -2.49427000 |
| H | 7.39127500  | -1.22143400 | -1.23511300 |

**P3b--OBn**

|   |             |             |             |
|---|-------------|-------------|-------------|
| C | -1.53624600 | -1.75077700 | 2.09635500  |
| C | -0.23515200 | 0.01503800  | 1.09770700  |
| C | 0.07587200  | -1.32211500 | 0.39531300  |
| C | -0.27517500 | -2.35625100 | 1.46998800  |
| H | -1.71253100 | -2.09279500 | 3.11635900  |
| H | -2.41493100 | -1.96789400 | 1.48919400  |
| H | 0.64555600  | 0.37652100  | 1.62794900  |
| H | -0.45724900 | -3.34705700 | 1.05353800  |
| C | -0.77999600 | 1.11583200  | 0.18795300  |
| C | -2.31848600 | 0.96606000  | 0.37120500  |
| N | -1.29502000 | -0.27753200 | 2.09858300  |
| O | -2.49565300 | 0.42666000  | 1.65778600  |
| H | -0.59728100 | -1.46005400 | -0.45170600 |
| H | -0.51536200 | 0.91681200  | -0.84716700 |

|   |             |             |             |
|---|-------------|-------------|-------------|
| H | 0.52423200  | -2.43395600 | 2.21033700  |
| C | -0.30969900 | 2.49574500  | 0.61988700  |
| O | -0.10529800 | 2.78123600  | 1.77481200  |
| O | -0.15449300 | 3.44683200  | -0.31833700 |
| C | -0.25008400 | 3.16348300  | -1.73094400 |
| H | -0.13409600 | 4.12682300  | -2.22008000 |
| H | 0.55305500  | 2.49541900  | -2.04420900 |
| H | -1.21997800 | 2.74014800  | -1.99076400 |
| C | -3.16950600 | 2.22677600  | 0.27648200  |
| H | -3.11334300 | 2.66754400  | -0.71830300 |
| H | -4.20858200 | 1.96228100  | 0.47833800  |
| H | -2.84107100 | 2.95172700  | 1.02019100  |
| N | -2.75987400 | 0.09570500  | -0.76896000 |
| N | -3.32552500 | -0.94717700 | -0.43760900 |
| C | -3.64089900 | -1.80057400 | -1.57475600 |
| O | -2.91466600 | -2.74982600 | -1.79565900 |
| N | -4.76829700 | -1.46627200 | -2.21417500 |
| H | -5.10990700 | -2.05247000 | -2.96035000 |
| H | -5.29493900 | -0.64606500 | -1.95988500 |
| C | 2.47937500  | -1.45003700 | 0.70447300  |
| H | 2.27290800  | -0.90073500 | 1.63037900  |
| H | 2.66872500  | -2.49312800 | 0.97911500  |
| O | 1.36767900  | -1.36912800 | -0.18897900 |
| C | 3.69417200  | -0.85885300 | 0.03598000  |
| C | 3.60016900  | 0.34578600  | -0.66751600 |
| C | 4.93568000  | -1.48758700 | 0.14105000  |
| C | 4.73006300  | 0.91292500  | -1.24940300 |
| H | 2.63642100  | 0.83015400  | -0.76363600 |
| C | 6.07017500  | -0.91828700 | -0.43627400 |
| H | 5.01575100  | -2.42859800 | 0.67480300  |
| C | 5.96988700  | 0.28326100  | -1.13359100 |
| H | 4.64471900  | 1.84649000  | -1.79370900 |
| H | 7.02808100  | -1.41773200 | -0.34808600 |
| H | 6.84937700  | 0.72475700  | -1.58761400 |

**P4b-OBn**

|   |             |             |             |
|---|-------------|-------------|-------------|
| C | 1.64045400  | -0.64053600 | 2.63530200  |
| C | 0.17082700  | 1.04071300  | 1.73246100  |
| C | -0.62566200 | -0.24301400 | 2.00477700  |
| C | 0.45251100  | -1.33708100 | 1.96427200  |
| H | 1.62216400  | -0.79395400 | 3.71651700  |
| H | 2.60886900  | -0.95633100 | 2.25636600  |
| H | -0.31493100 | 1.92858000  | 2.13247500  |
| H | 0.67334800  | -1.58882800 | 0.92347300  |
| C | 0.45802900  | 1.24256600  | 0.23342500  |
| C | 2.00847000  | 1.30519600  | 0.15215000  |
| N | 1.47531600  | 0.82871600  | 2.39854100  |
| O | 2.46799600  | 1.35234800  | 1.49082100  |
| H | 0.11105400  | 0.39642400  | -0.35510000 |
| H | 0.15751200  | -2.25107800 | 2.47959100  |
| C | -0.22147500 | 2.47563200  | -0.32685300 |
| O | -0.55939700 | 3.44368400  | 0.31307300  |
| O | -0.38970100 | 2.35712400  | -1.64925600 |
| C | -0.99545100 | 3.48507800  | -2.32020300 |
| H | -1.05627500 | 3.19908500  | -3.36627800 |
| H | -0.37370400 | 4.37188700  | -2.19860200 |
| H | -1.98867300 | 3.67268100  | -1.91317600 |
| C | 2.62338300  | 2.48280800  | -0.59236000 |
| H | 2.34842800  | 2.45504900  | -1.64612800 |
| H | 3.70955200  | 2.42991000  | -0.50579800 |
| H | 2.27413700  | 3.41525700  | -0.14897200 |
| N | 2.42014800  | 0.08641500  | -0.61577400 |
| N | 3.24589500  | -0.62861900 | -0.04524500 |
| C | 3.57075700  | -1.81886800 | -0.78521700 |
| O | 3.01685300  | -2.86471000 | -0.56920600 |
| H | -1.07304700 | -0.19255100 | 3.00589900  |
| C | -2.58948800 | -1.38585400 | 1.27802100  |
| H | -2.11519700 | -2.36982000 | 1.18914400  |

|   |             |             |             |
|---|-------------|-------------|-------------|
| H | -2.97072600 | -1.29376800 | 2.30576200  |
| O | -1.64638700 | -0.34894900 | 1.03280800  |
| O | 4.58060300  | -1.59199900 | -1.60564300 |
| C | 5.08301400  | -2.74717800 | -2.32807300 |
| H | 5.92639300  | -2.37721300 | -2.90264100 |
| H | 5.39851600  | -3.51507000 | -1.62312600 |
| H | 4.30697000  | -3.13713100 | -2.98524200 |
| C | -3.72048900 | -1.26564400 | 0.28922400  |
| C | -4.14965700 | -0.01174000 | -0.15454500 |
| C | -4.37158600 | -2.41023700 | -0.17512200 |
| C | -5.21462100 | 0.09310600  | -1.04575700 |
| H | -3.63820600 | 0.87629300  | 0.19445200  |
| C | -5.44329700 | -2.30594900 | -1.05985200 |
| H | -4.03619200 | -3.38834400 | 0.15329100  |
| C | -5.86706300 | -1.05305600 | -1.49883000 |
| H | -5.53579600 | 1.07063600  | -1.38698100 |
| H | -5.93947700 | -3.20252100 | -1.41307300 |
| H | -6.69589600 | -0.97041600 | -2.19219400 |



## **Spectra of compounds**

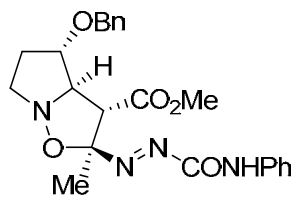

**10a**

<sup>1</sup>H-NMR (CDCl<sub>3</sub>, 400 MHz)

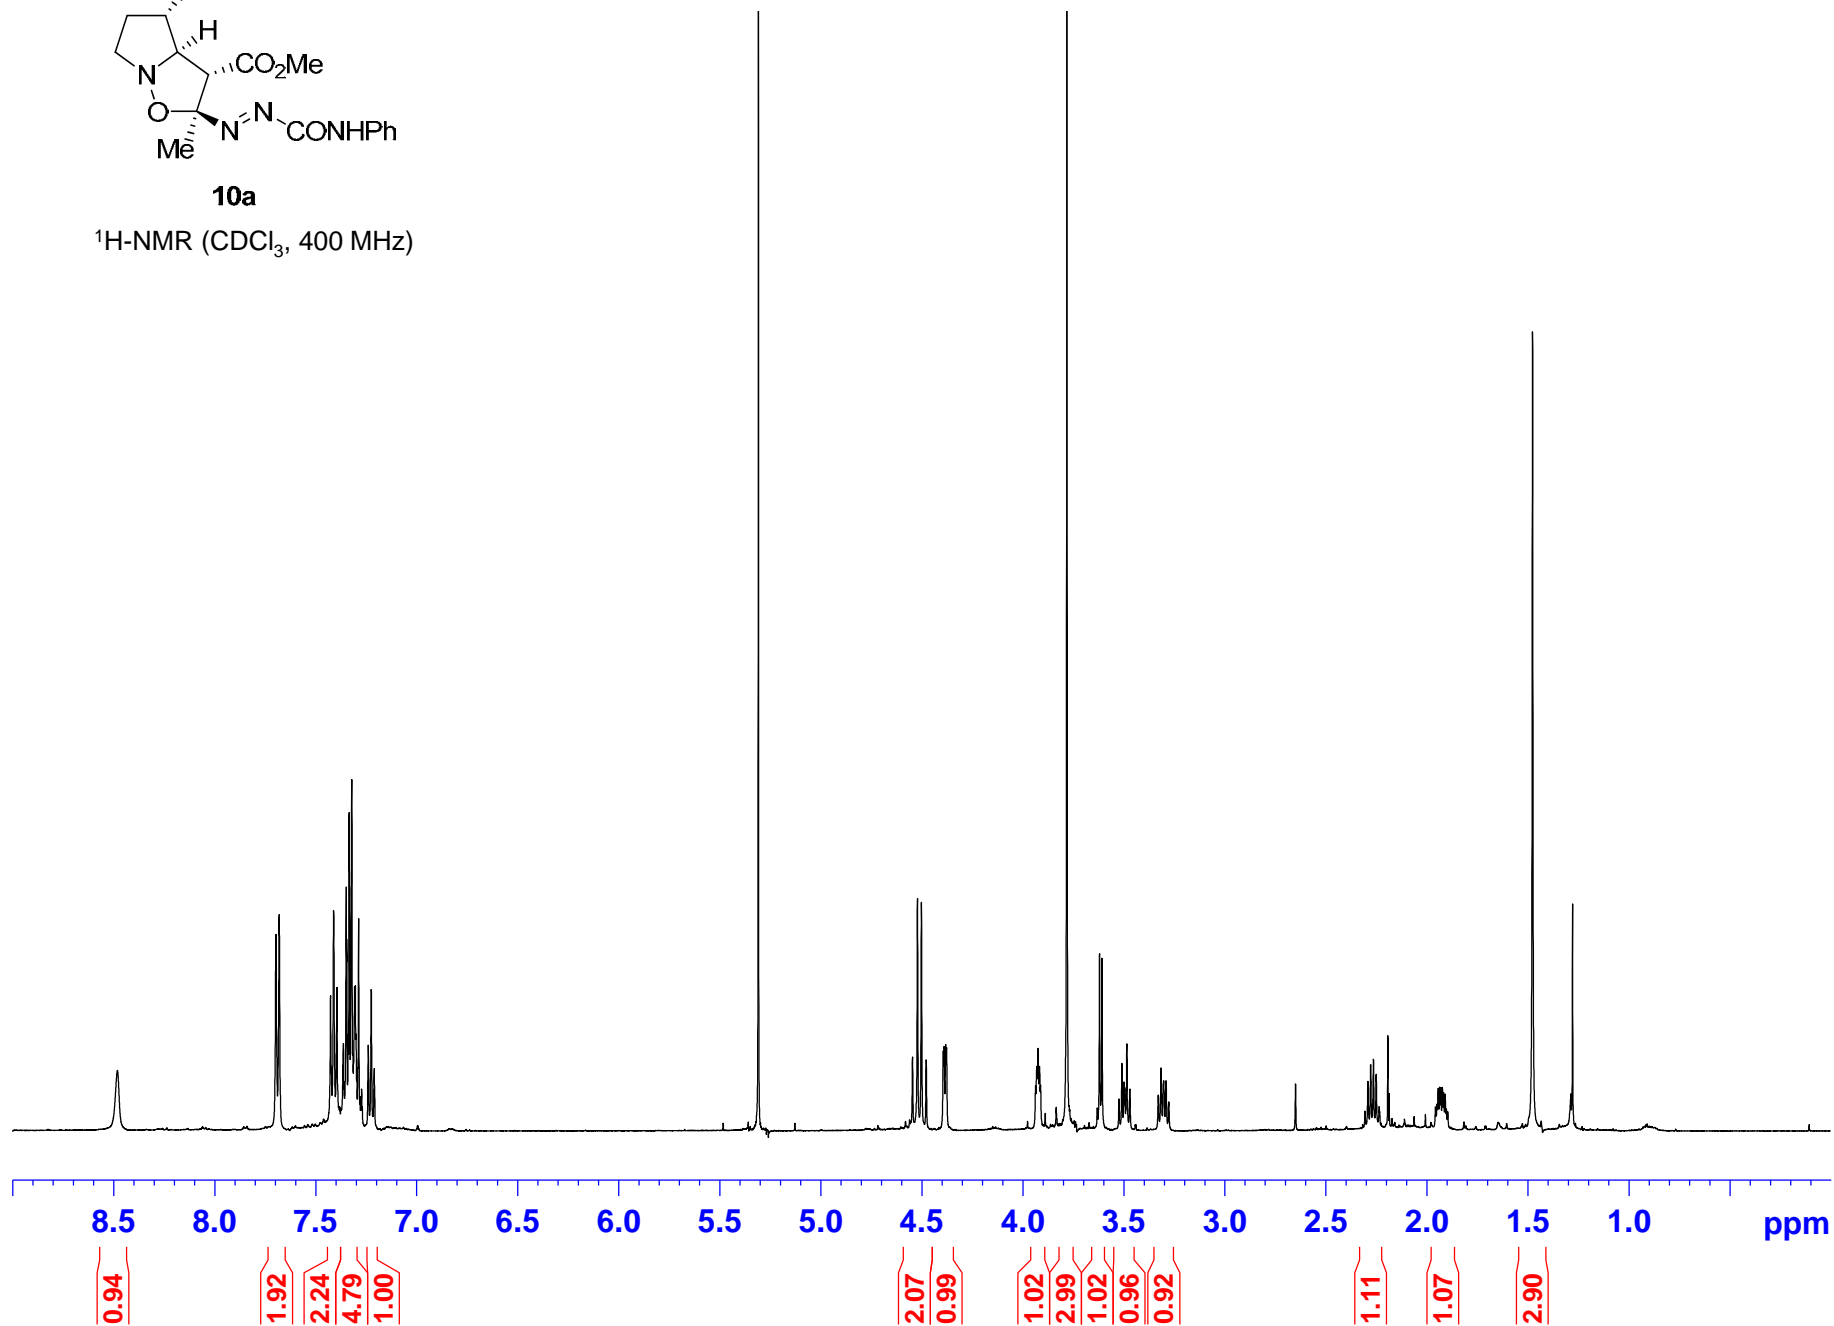

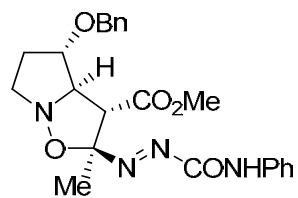

**10a**

<sup>13</sup>C-NMR (CDCl<sub>3</sub>, 100 MHz)

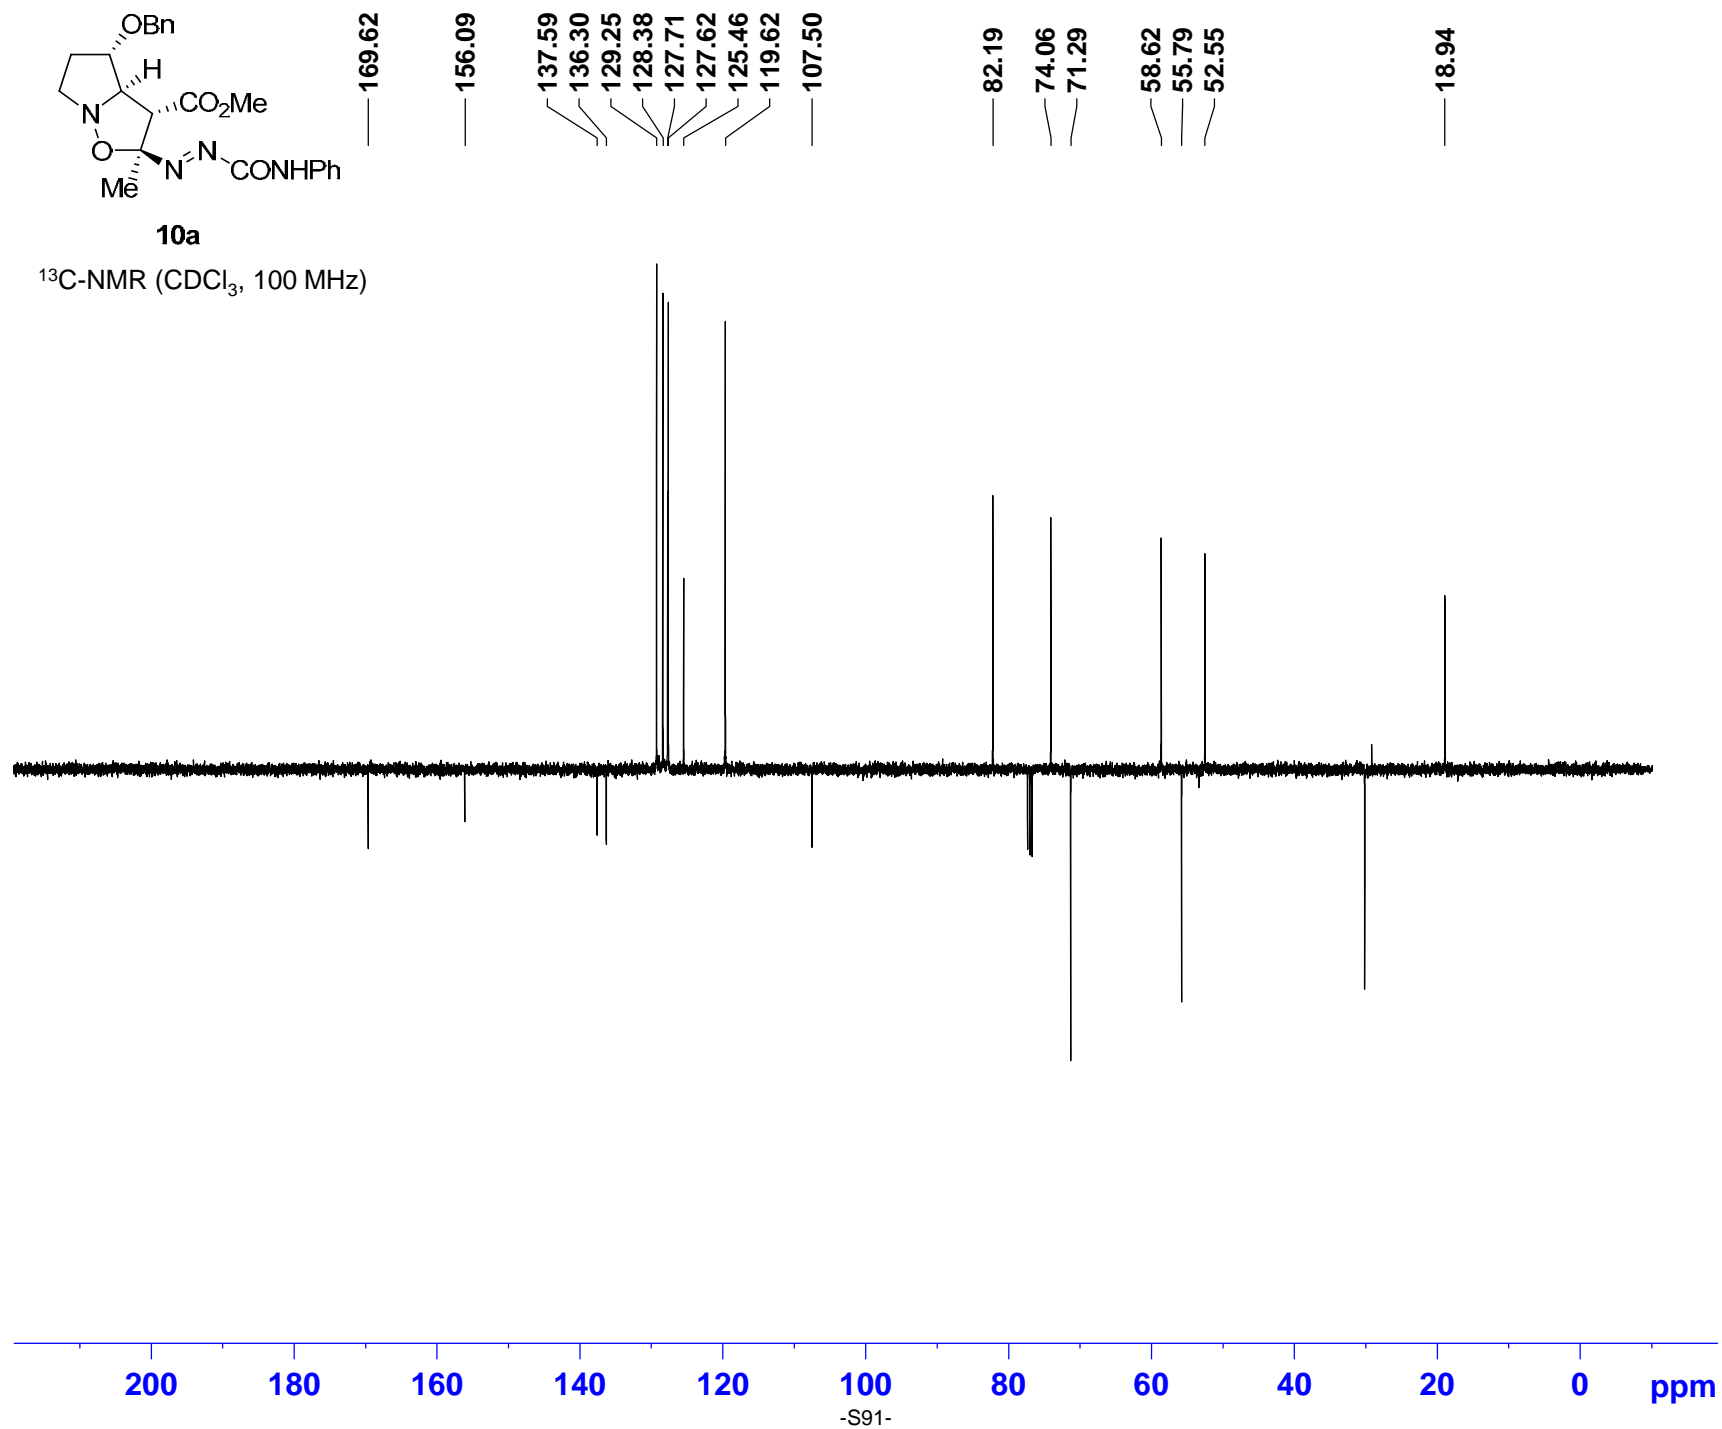

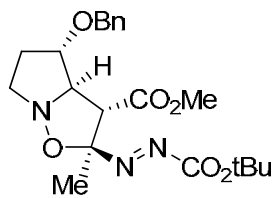

**10b**

<sup>1</sup>H-NMR (CDCl<sub>3</sub>, 400 MHz)

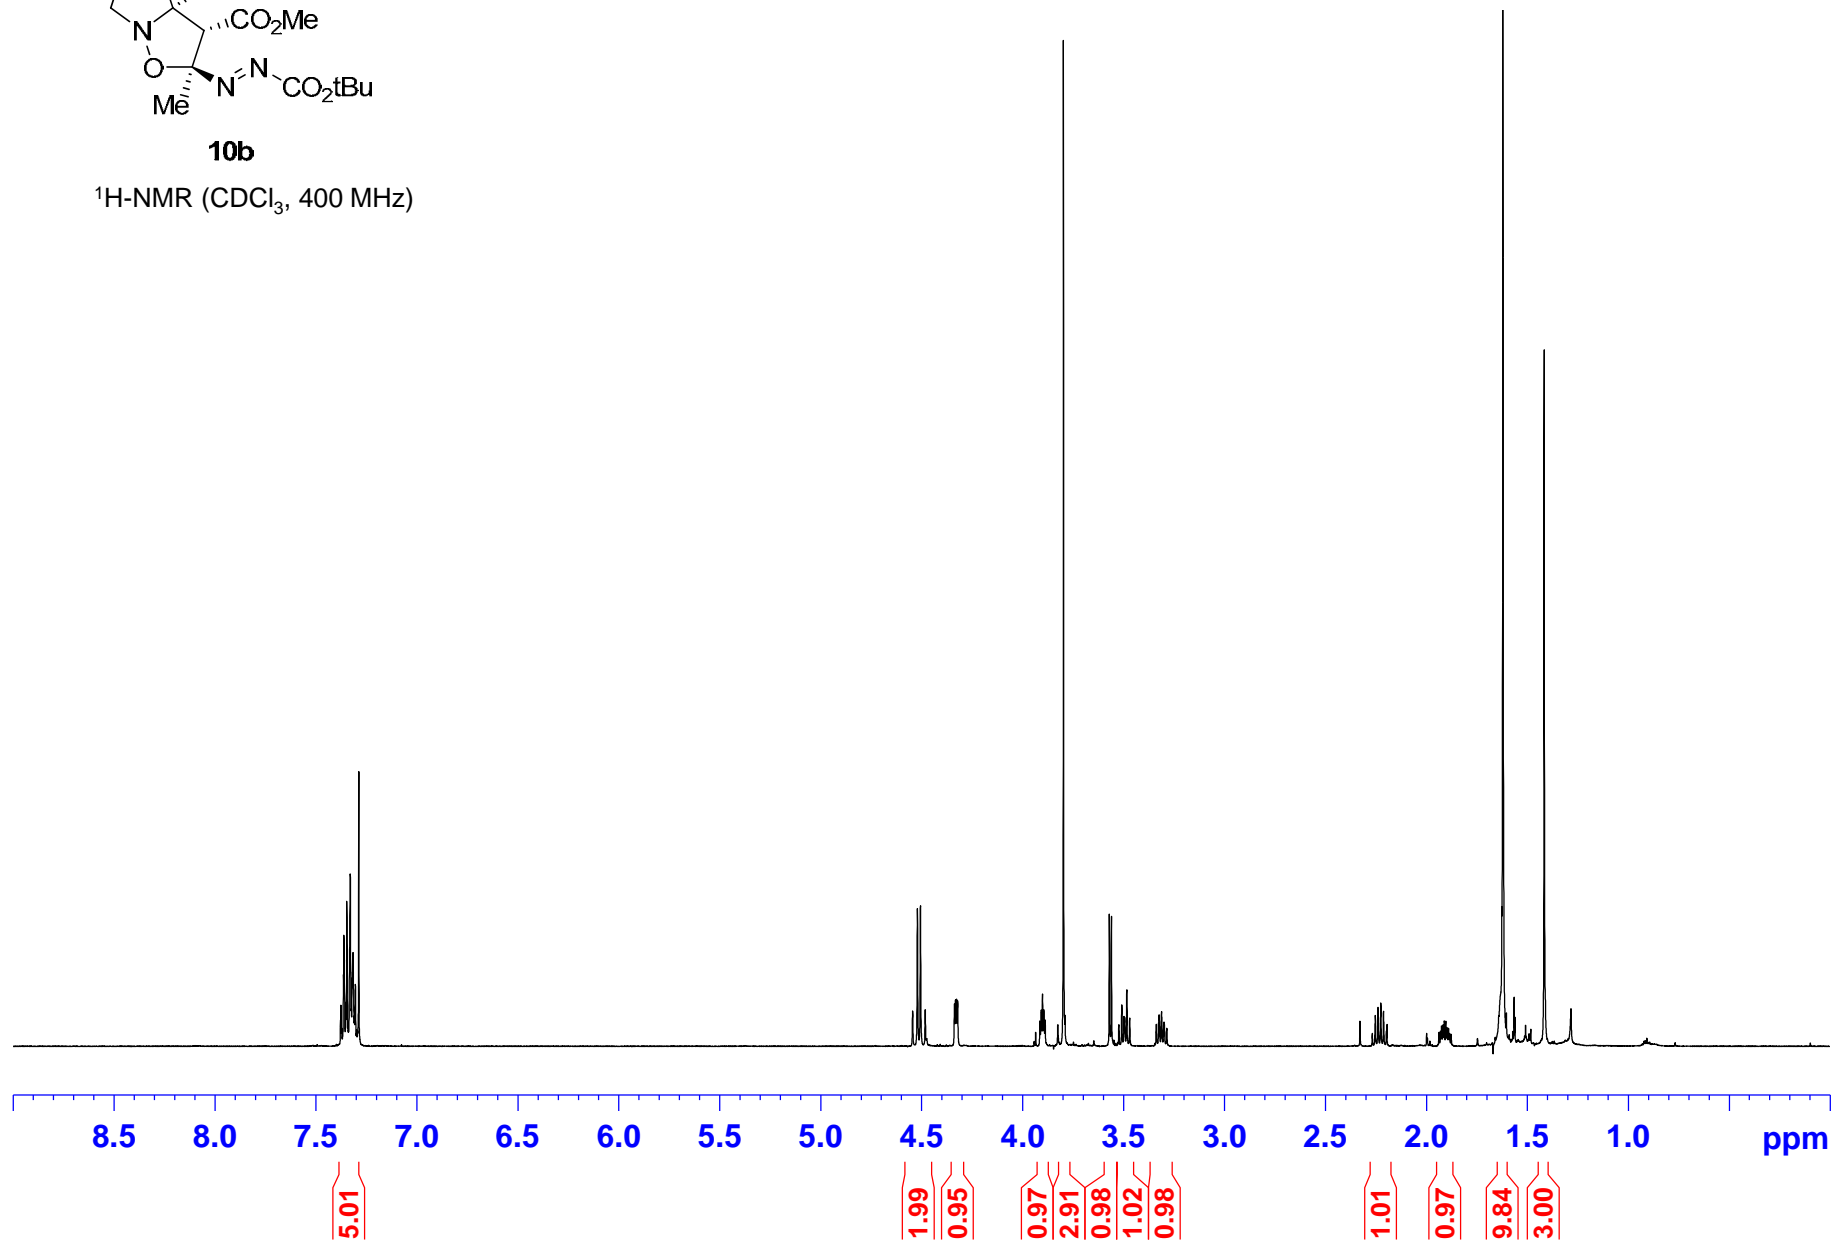

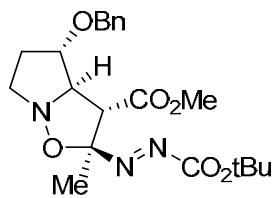

**10b**

<sup>13</sup>C-NMR (CDCl<sub>3</sub>, 100 MHz)

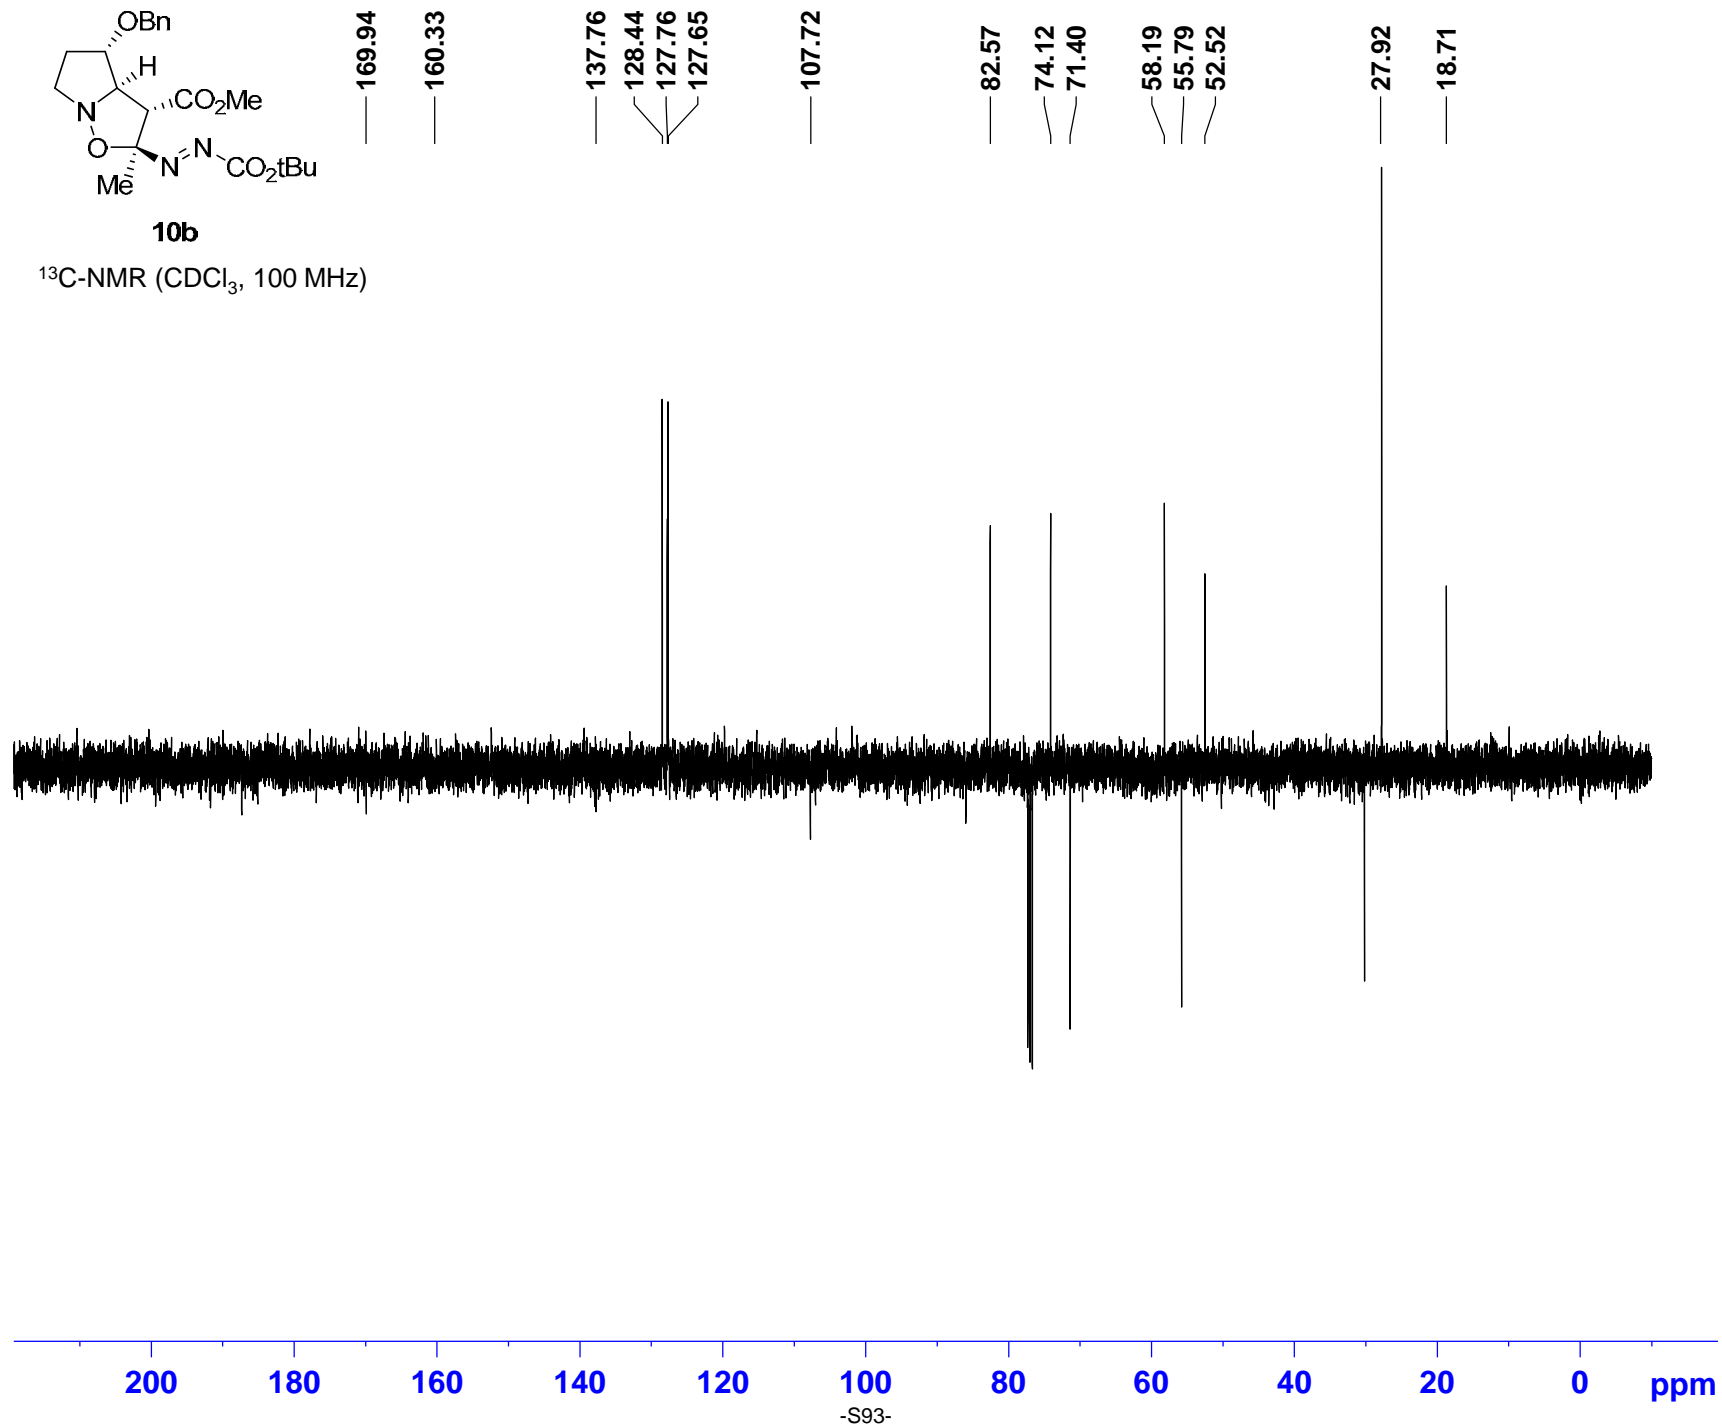

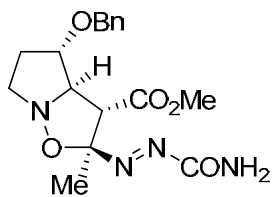

**10c**

<sup>1</sup>H-NMR (CDCl<sub>3</sub>, 400 MHz)

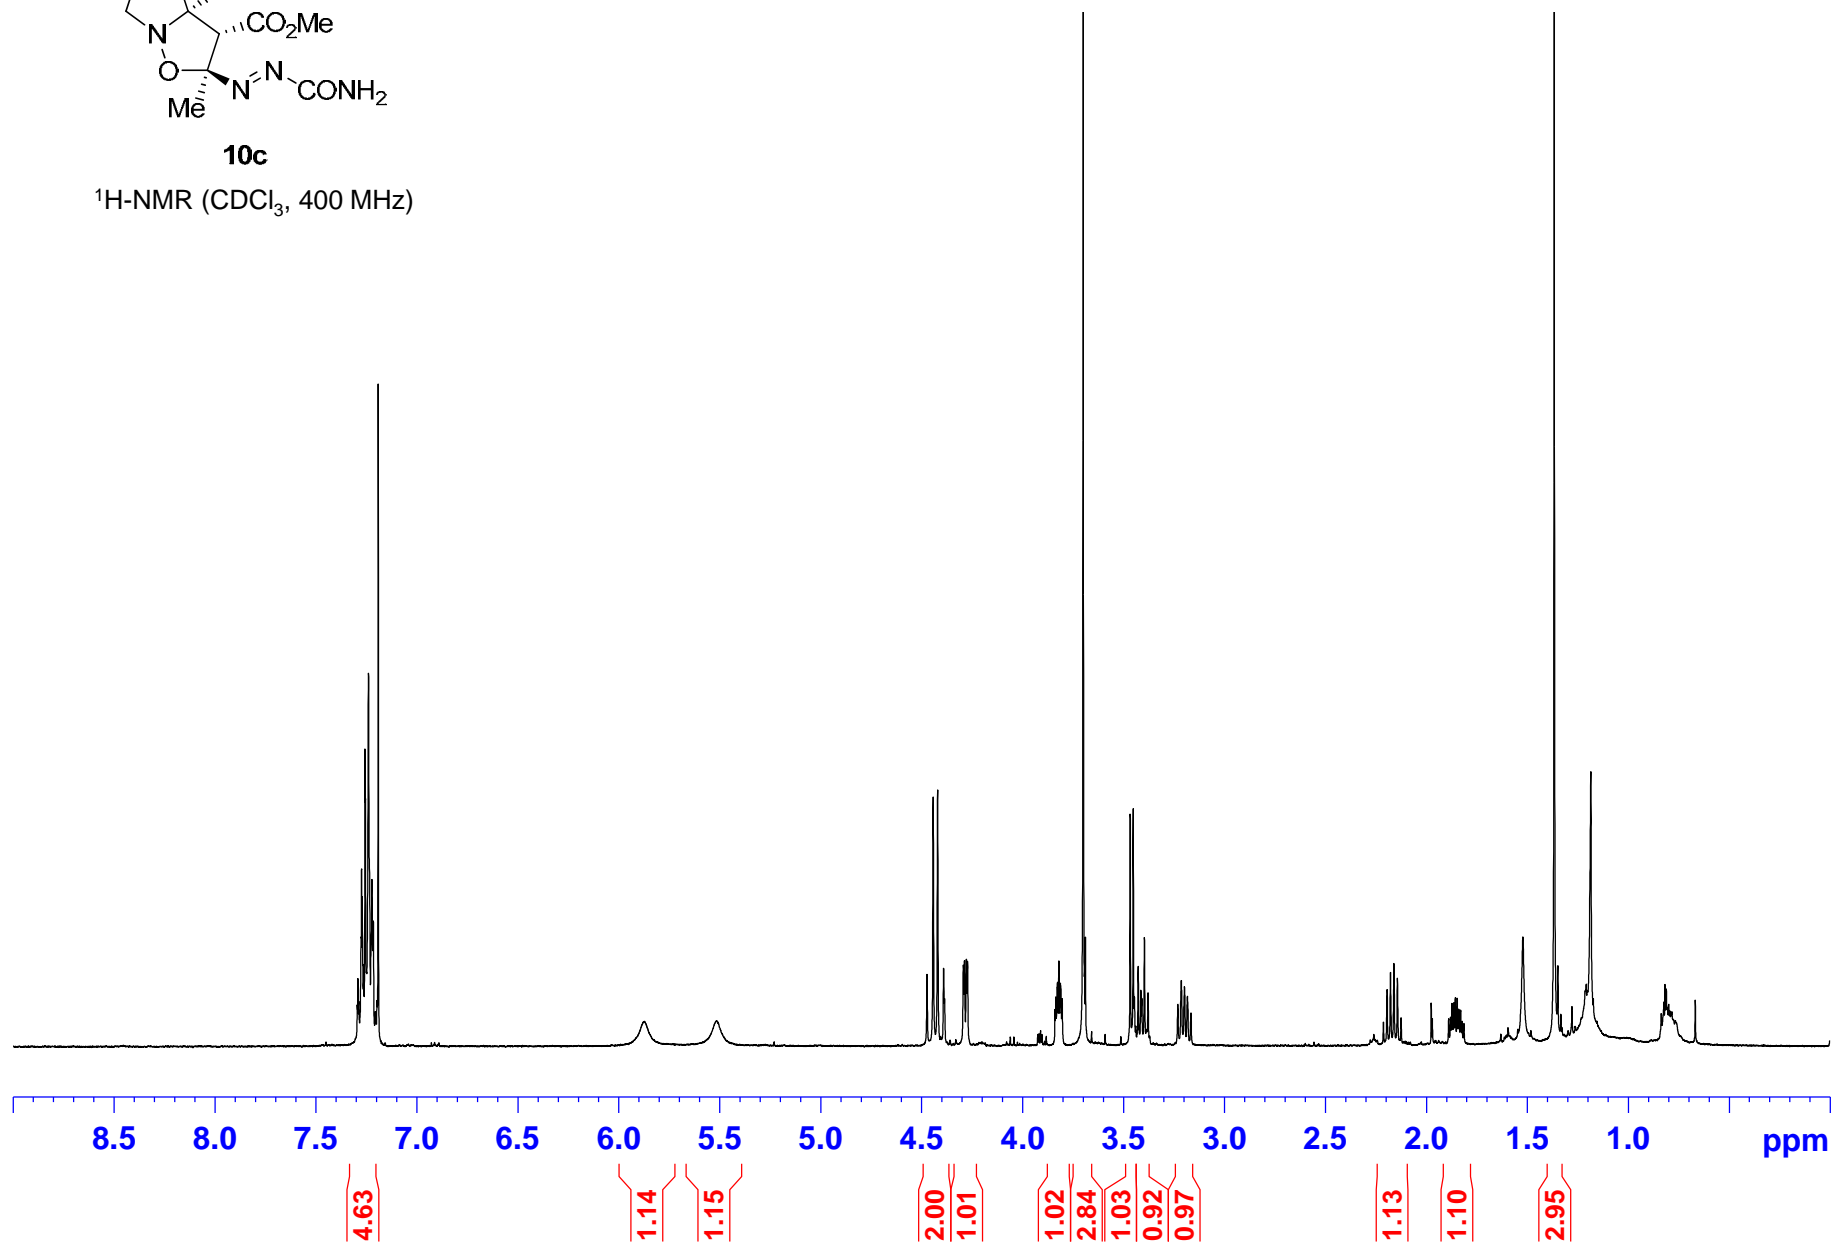

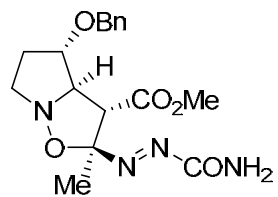

**10c**

<sup>13</sup>C-NMR (CDCl<sub>3</sub>, 100 MHz)

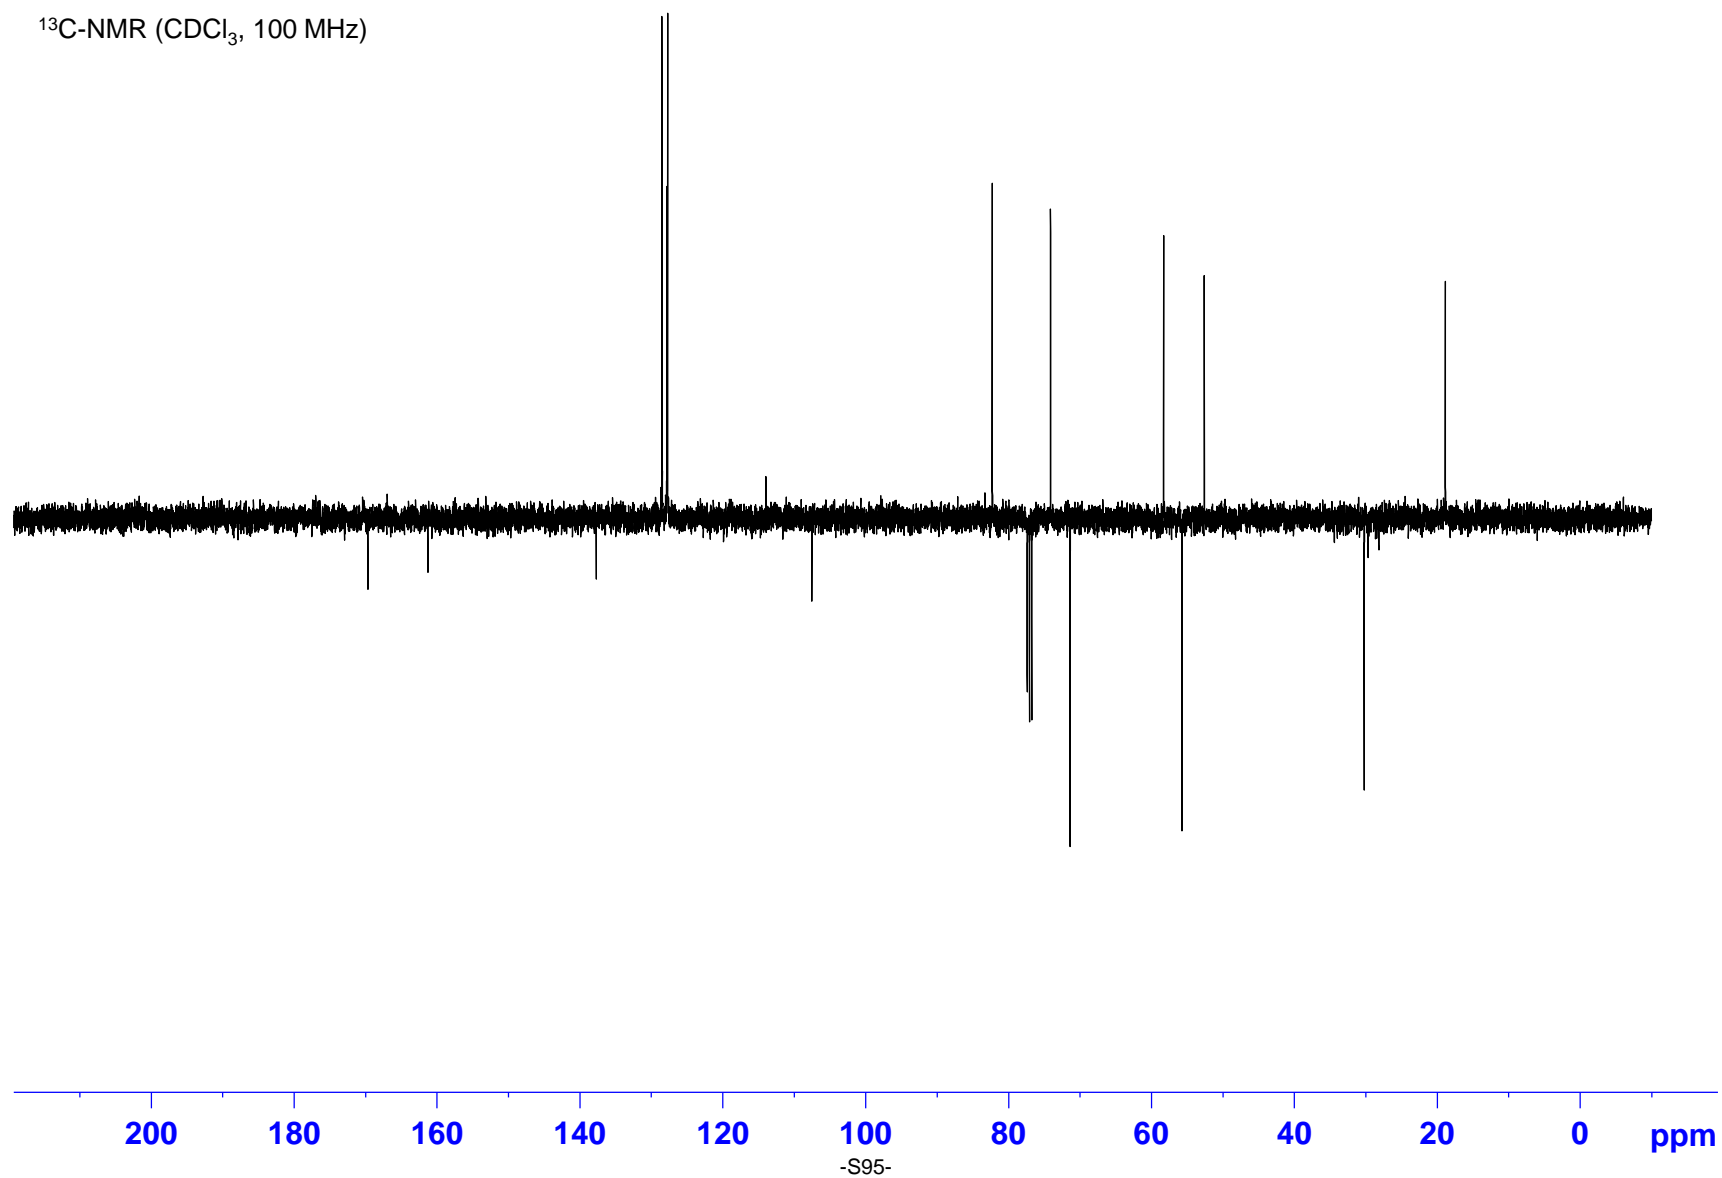

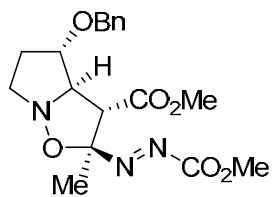

**10d**

<sup>1</sup>H-NMR (CDCl<sub>3</sub>, 400 MHz)

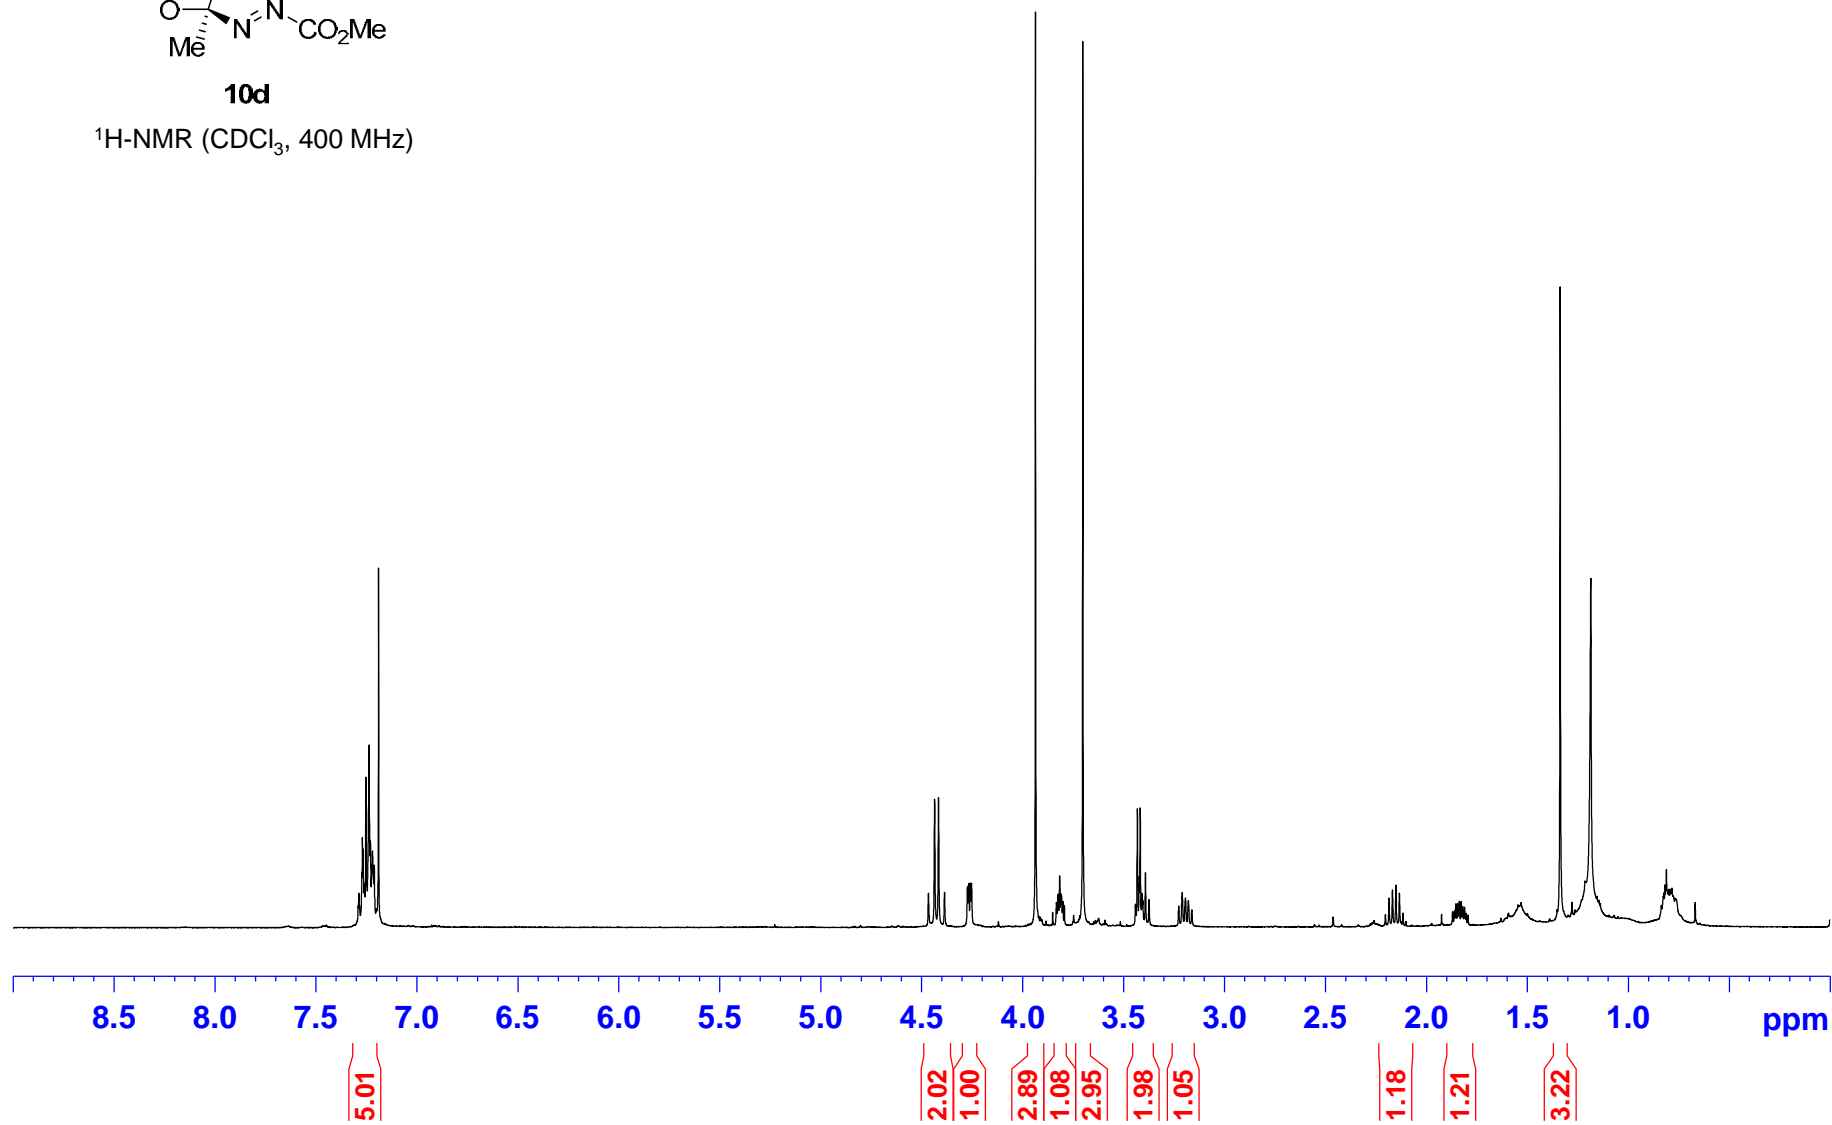



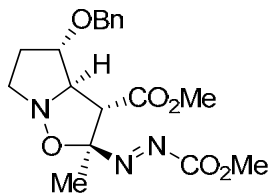

**10d**

<sup>13</sup>C-NMR (CDCl<sub>3</sub>, 100 MHz)

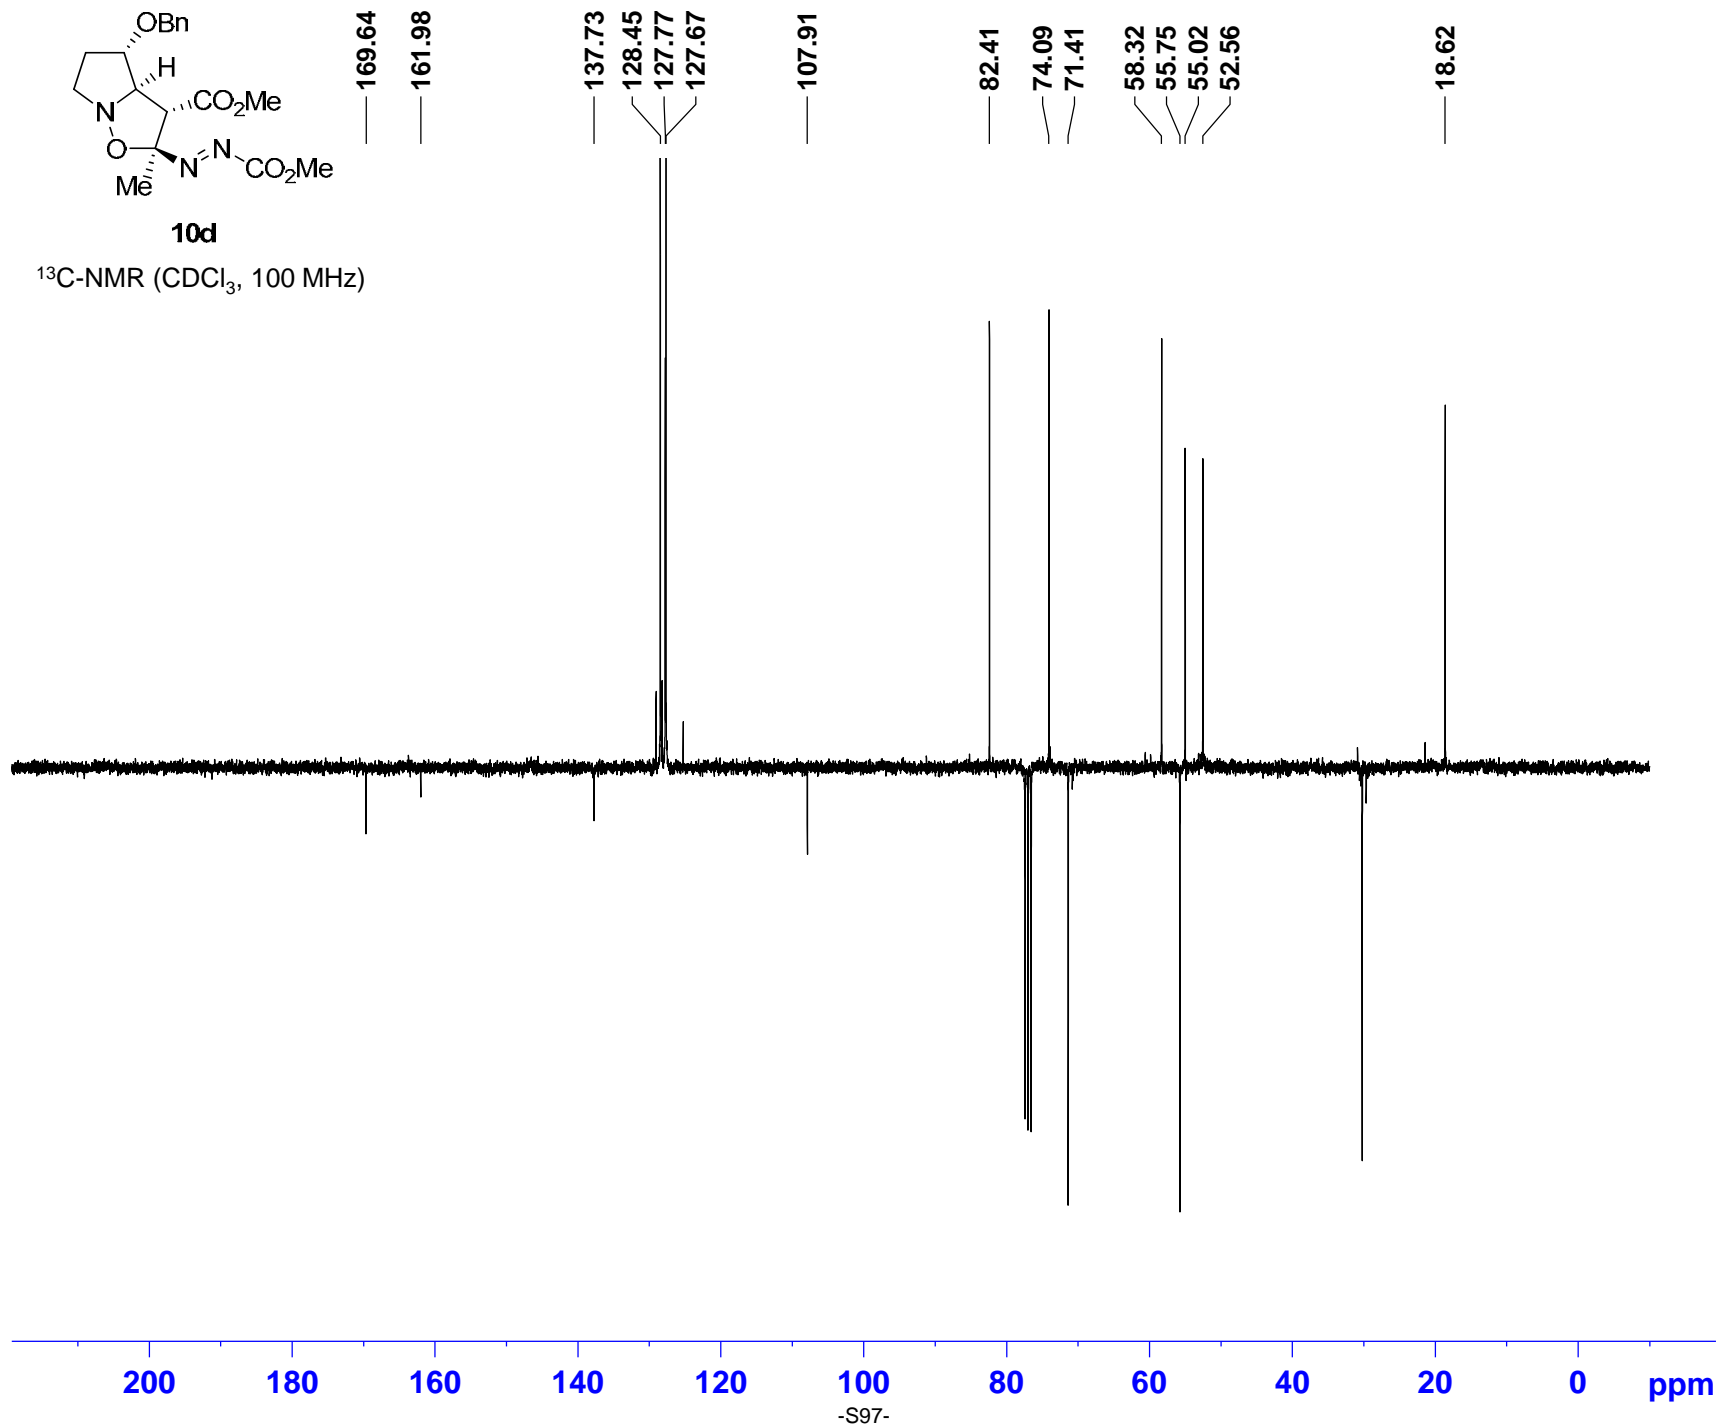



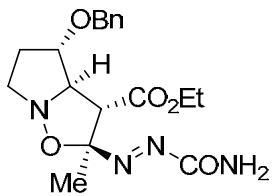

10e

<sup>13</sup>C-NMR (CDCl<sub>3</sub>, 100 MHz)

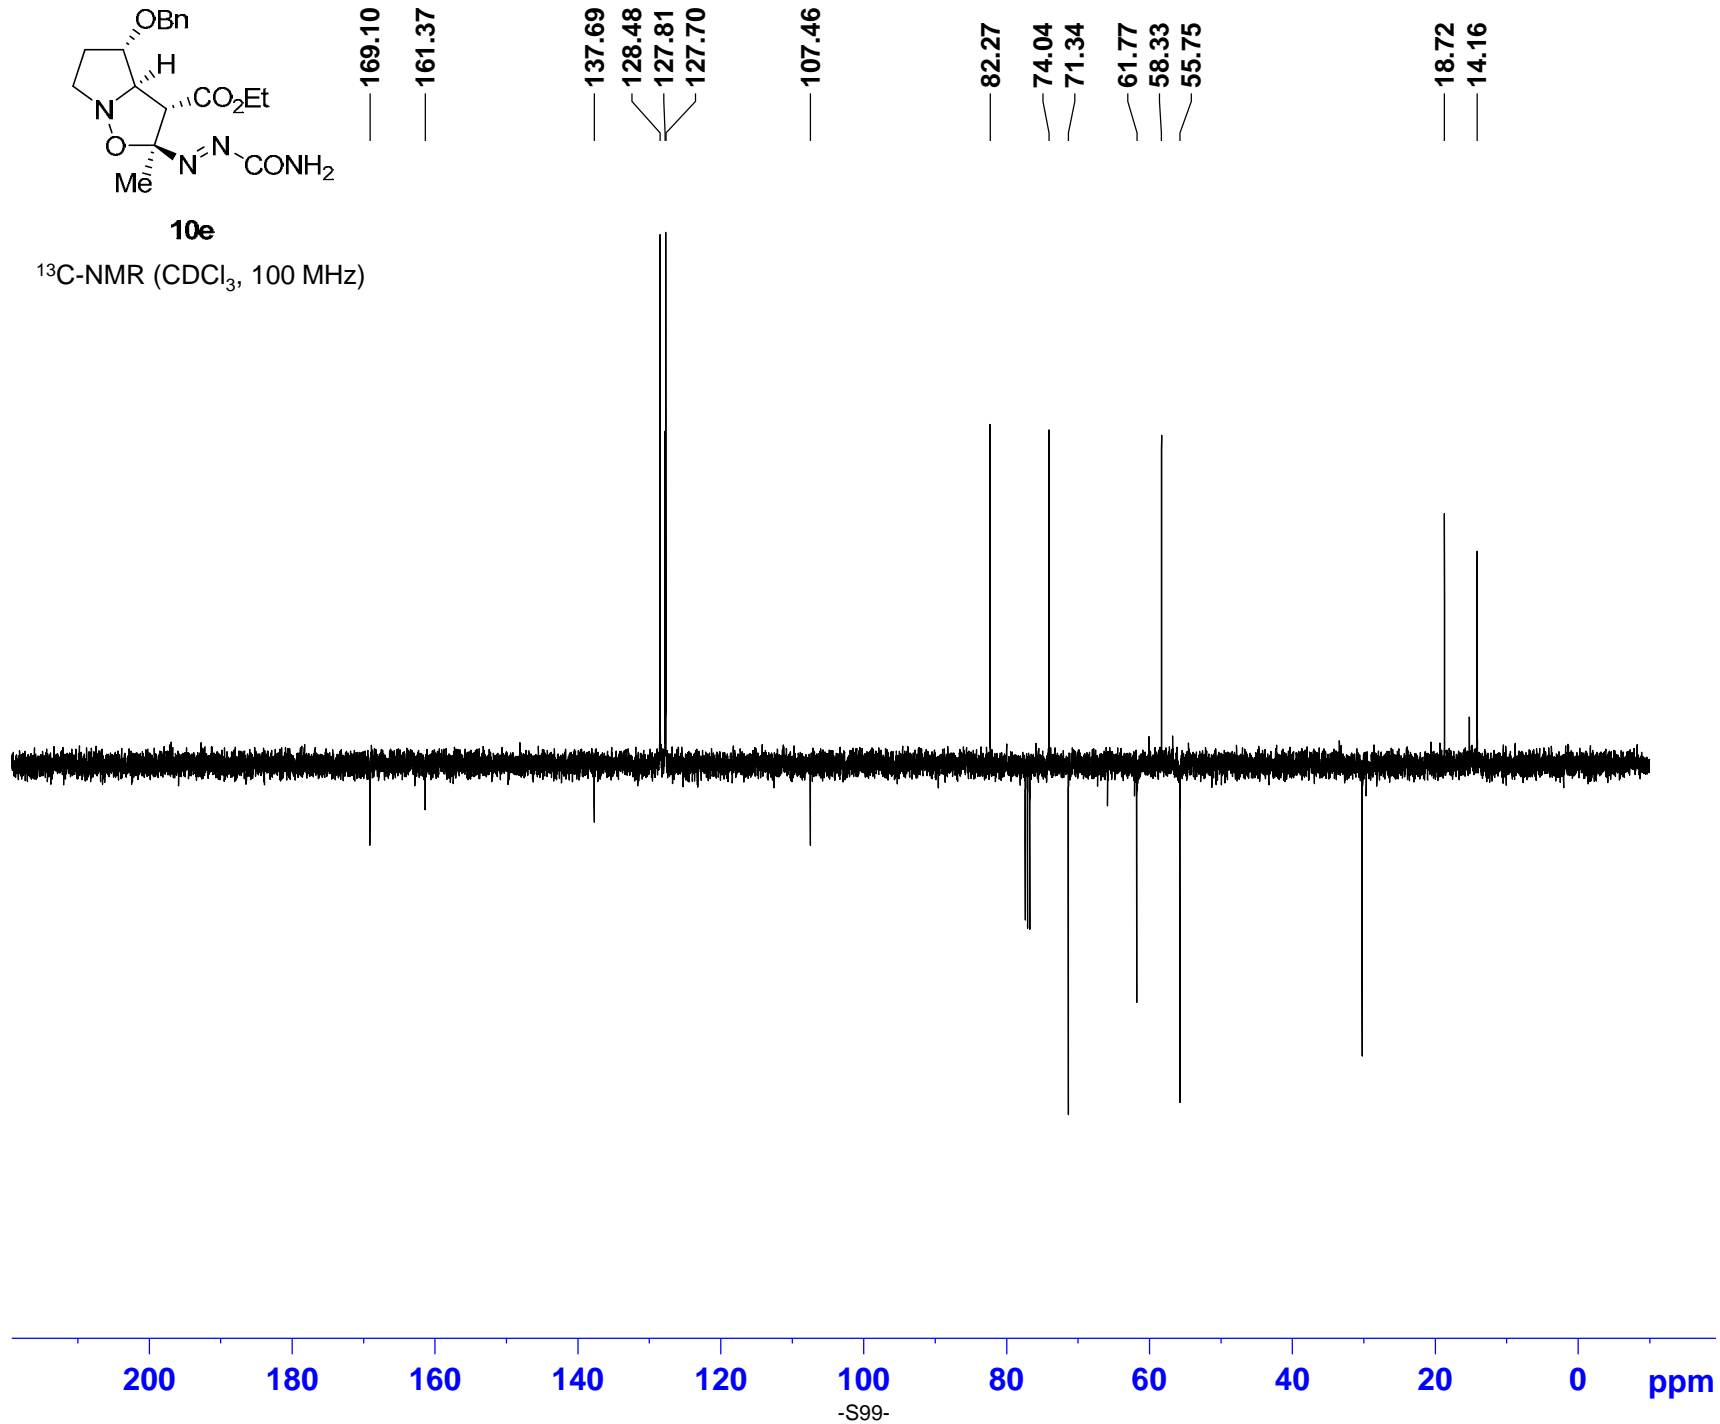

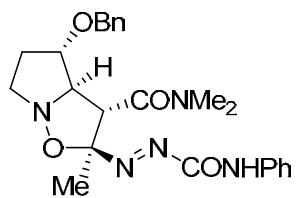

**10f**

<sup>1</sup>H-NMR (CDCl<sub>3</sub>, 400 MHz)

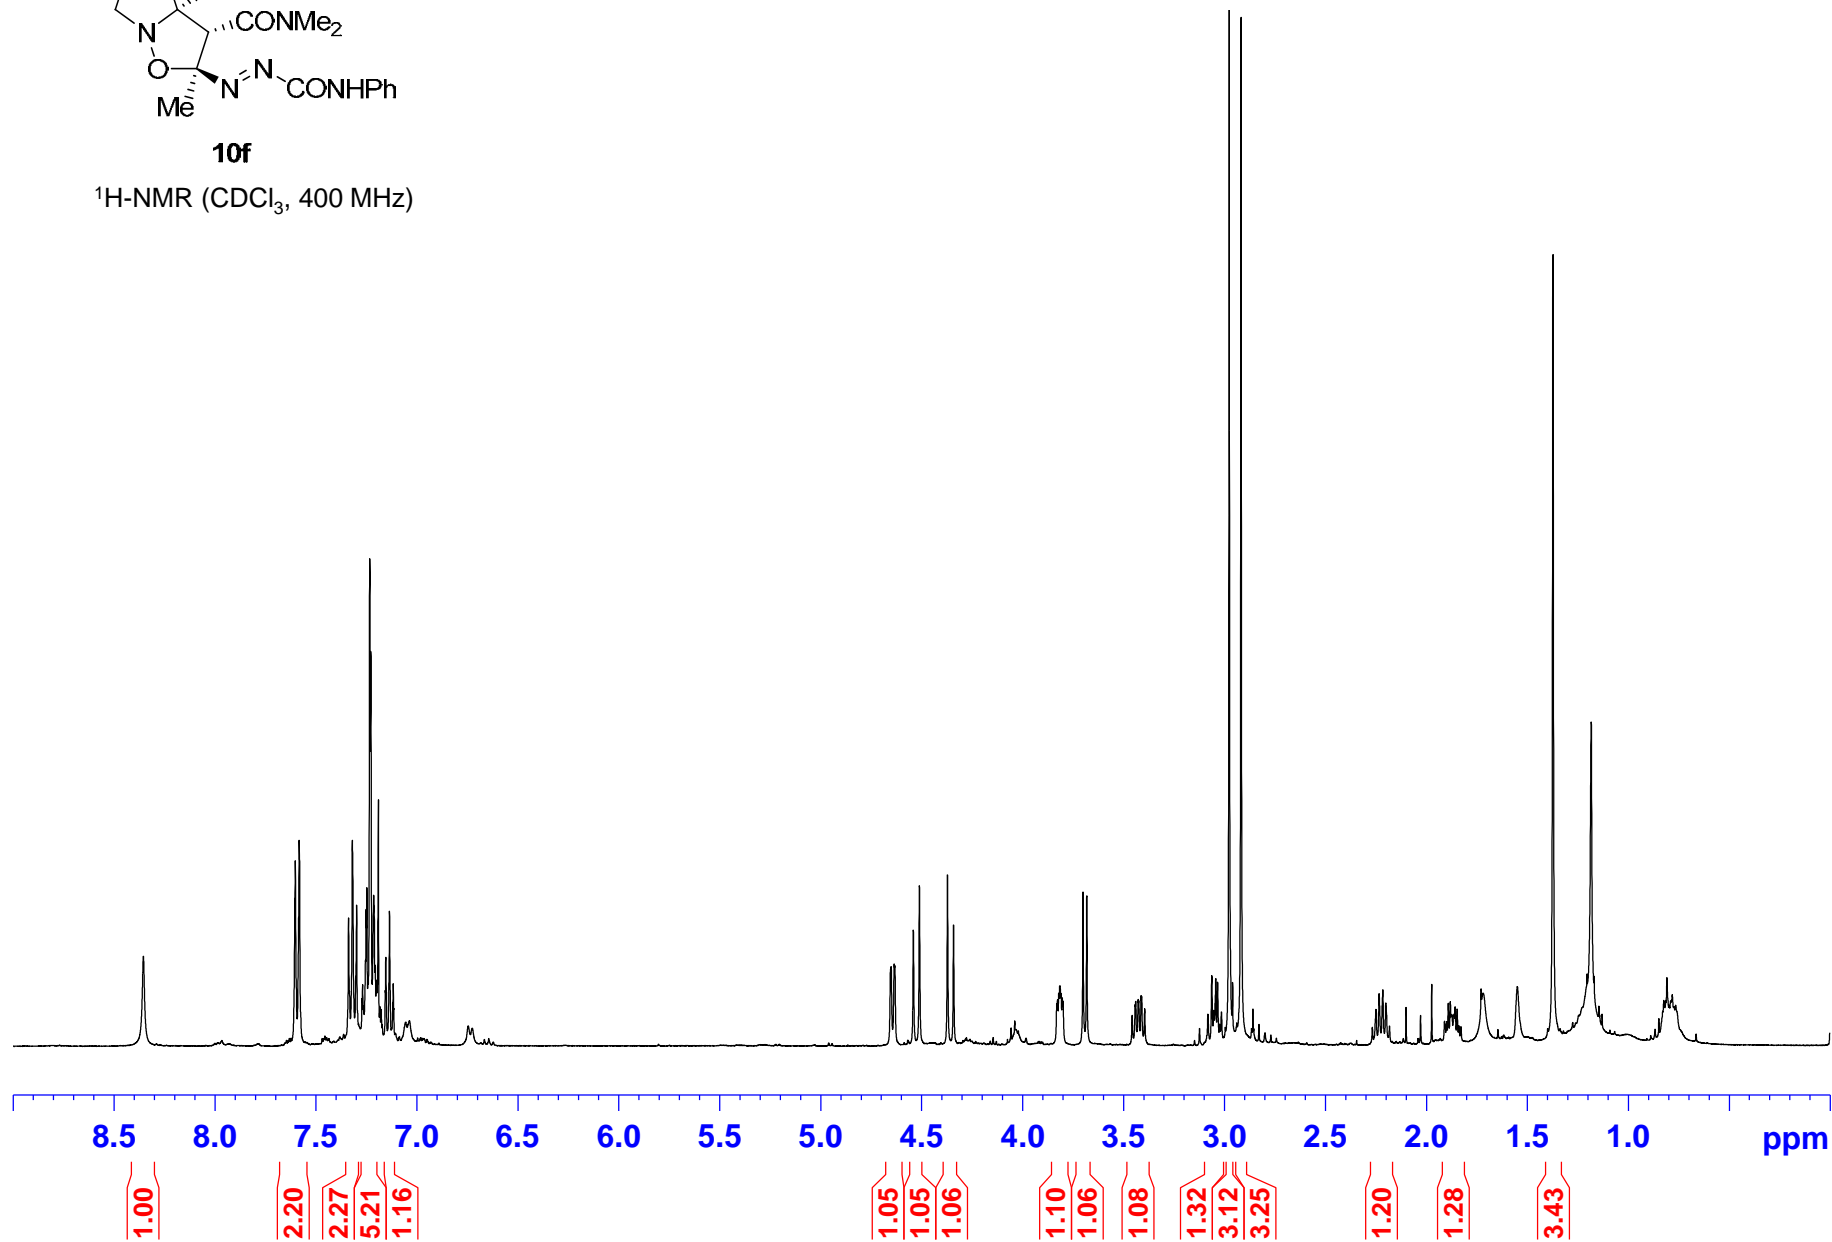

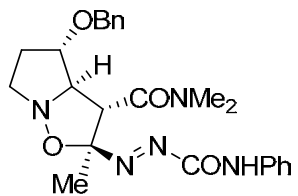

**10f**

<sup>13</sup>C-NMR (CDCl<sub>3</sub>, 100 MHz)

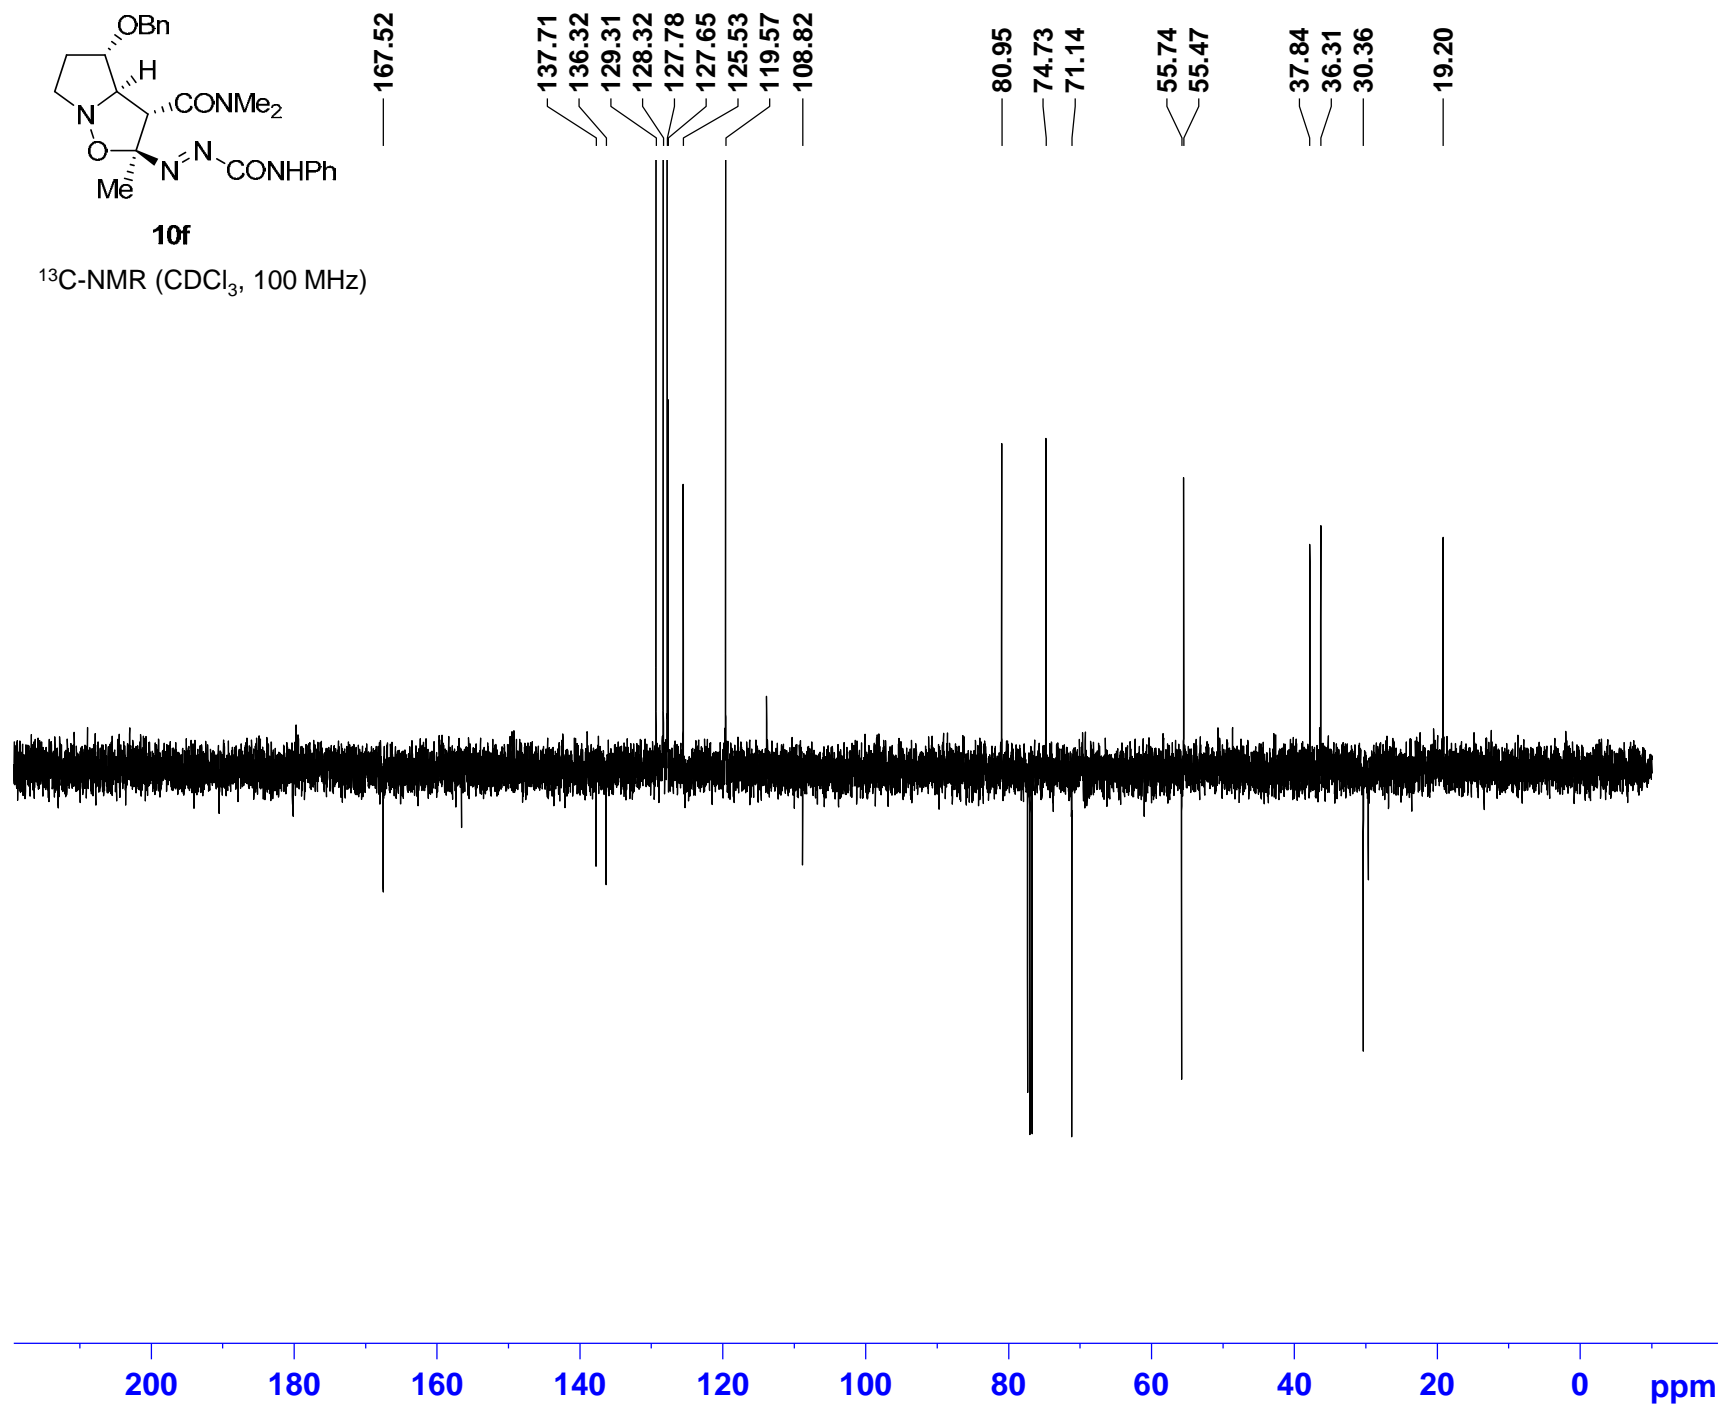

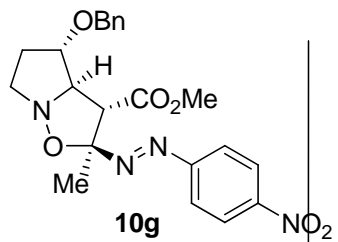

$^1\text{H-NMR}$  ( $\text{CDCl}_3$ , 400 MHz)

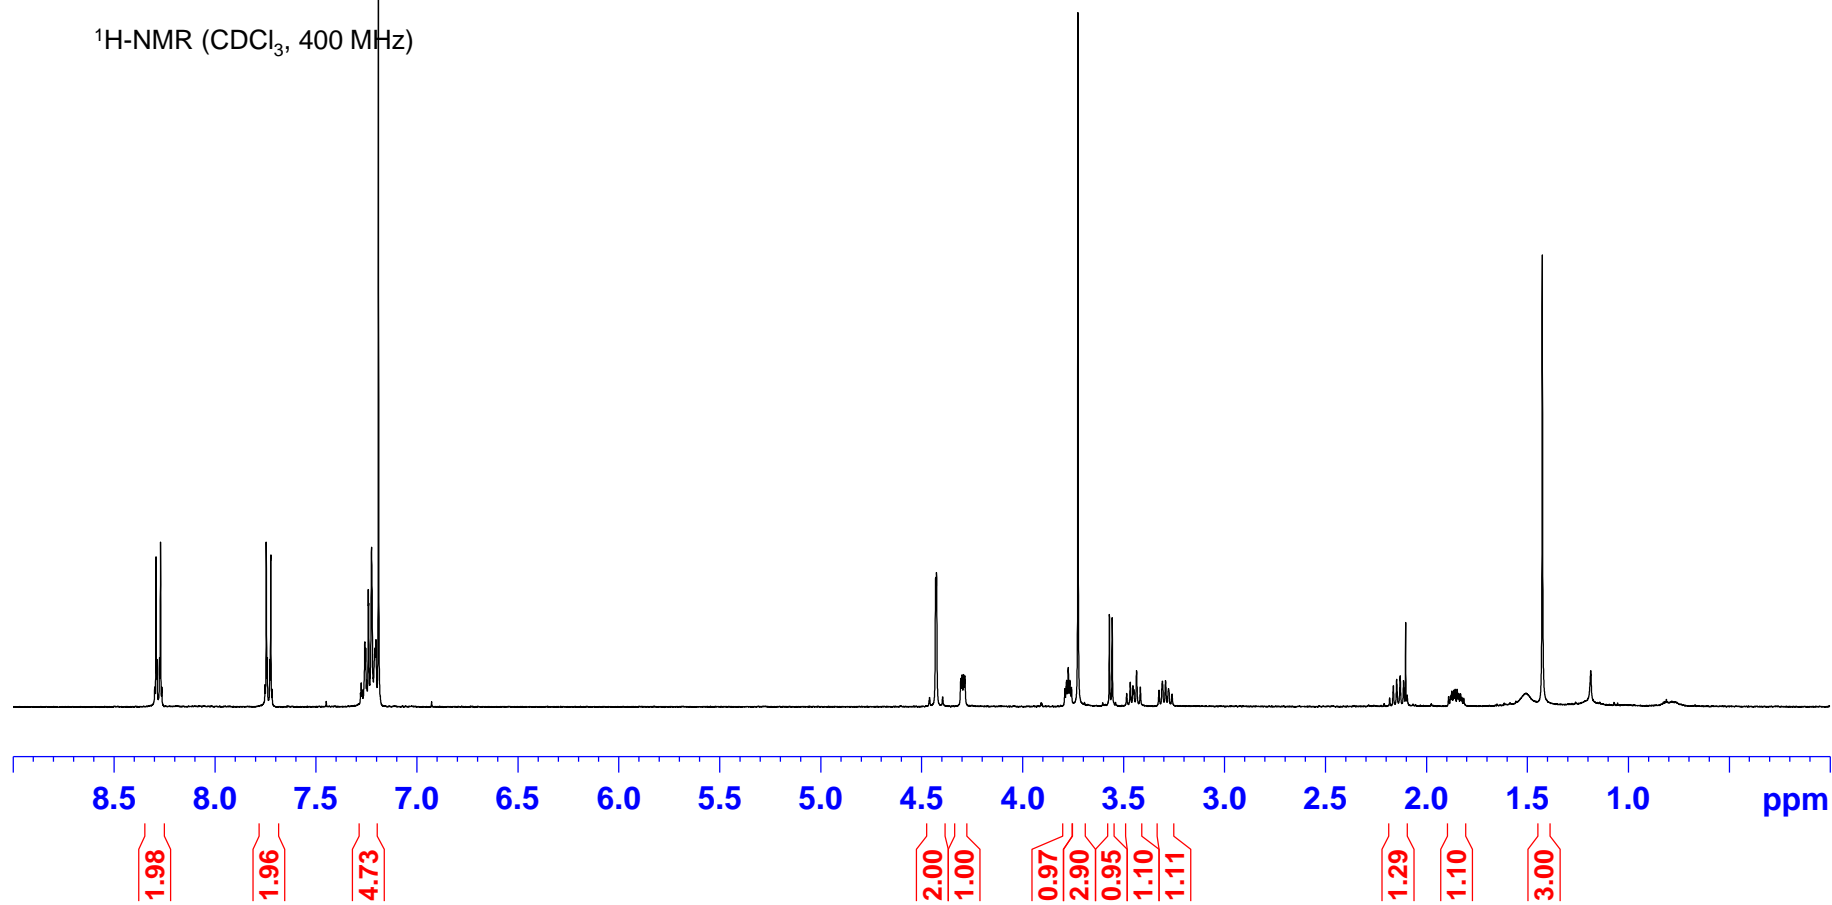

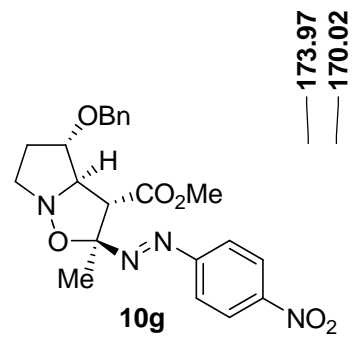

$^{13}\text{C-NMR}$  ( $\text{CDCl}_3$ , 100 MHz)

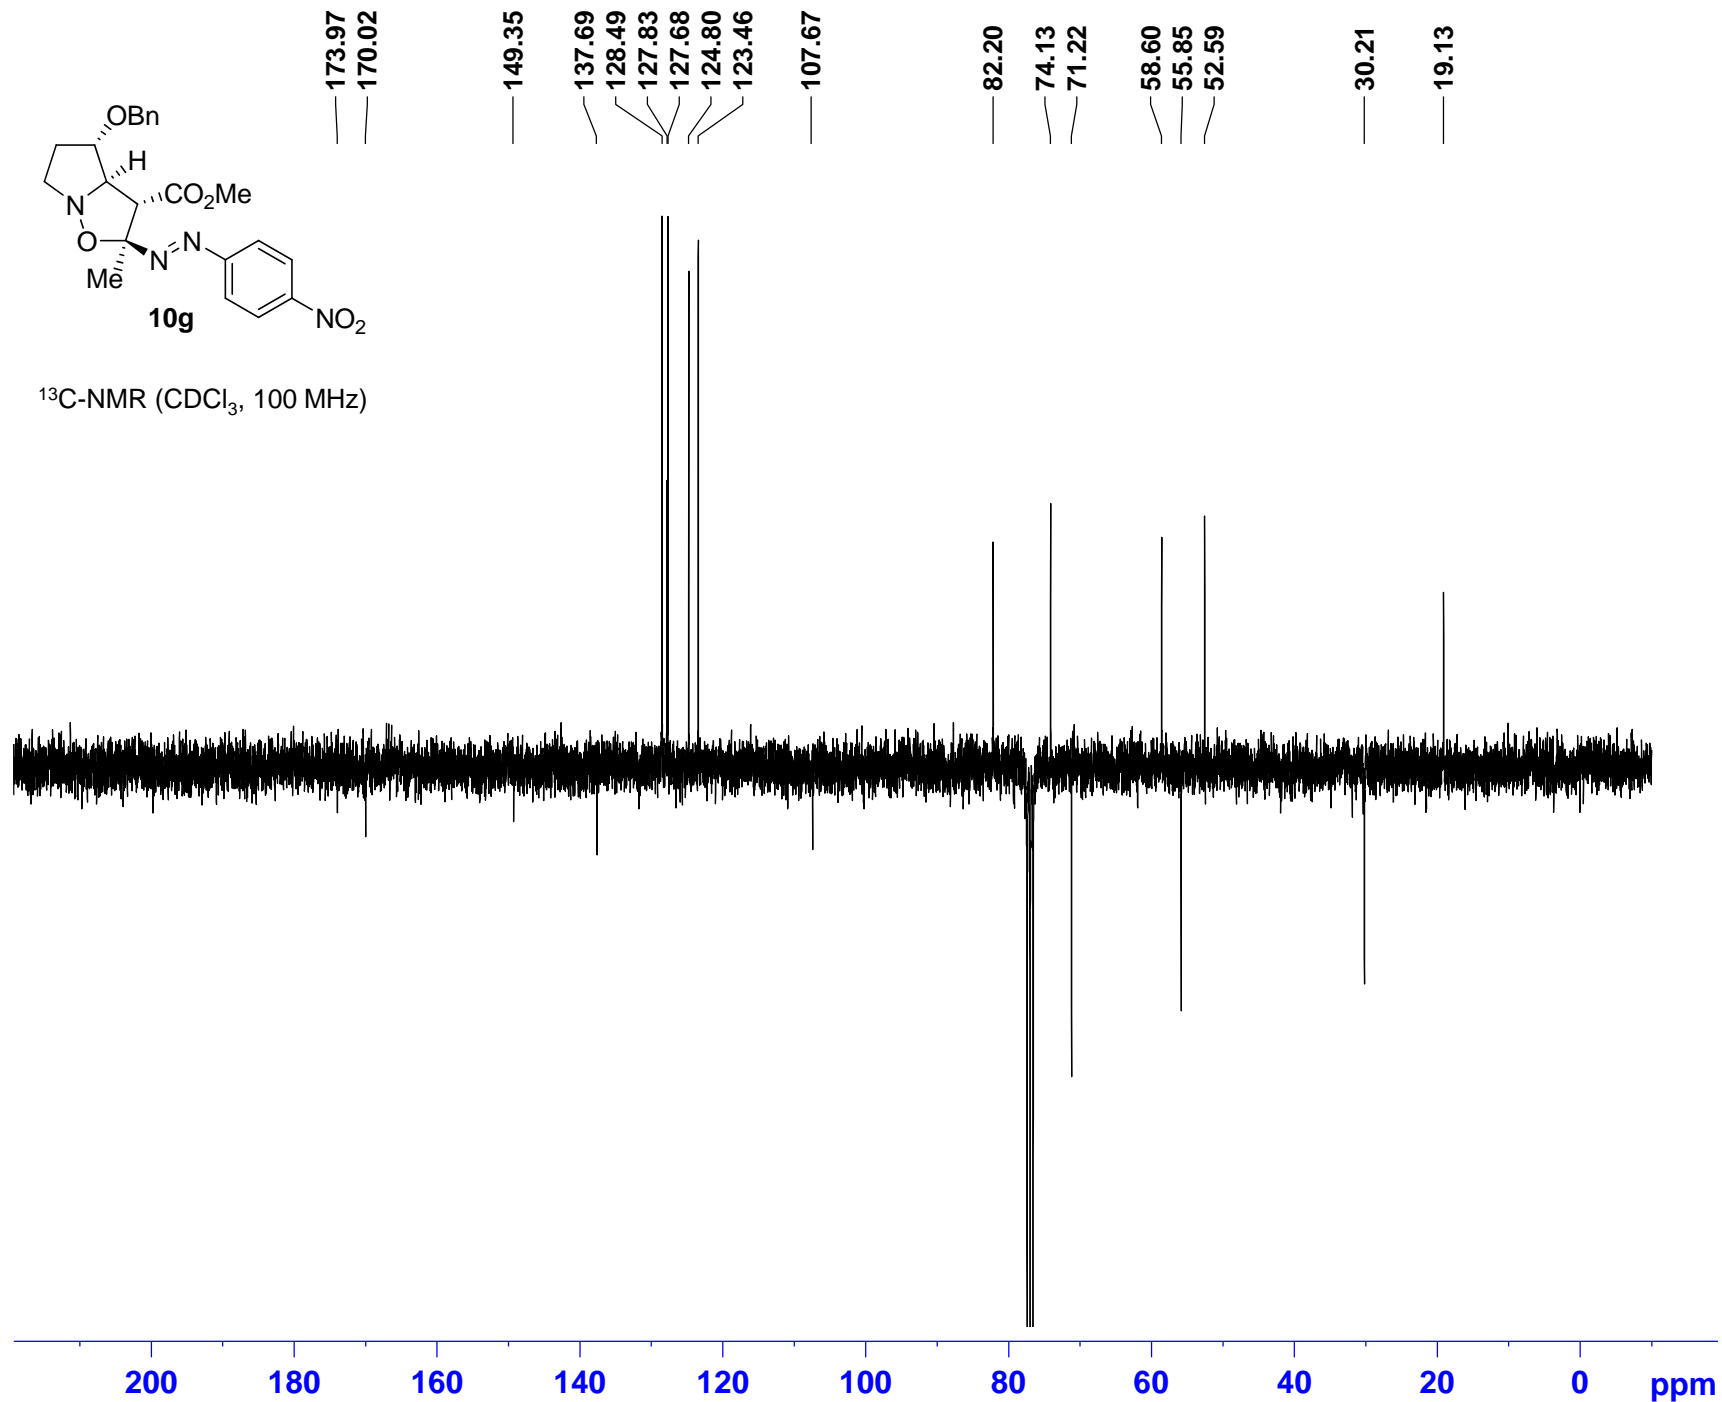

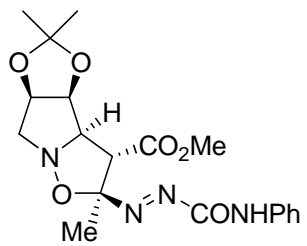

**11a**

<sup>1</sup>H-NMR (CDCl<sub>3</sub>, 400 MHz)

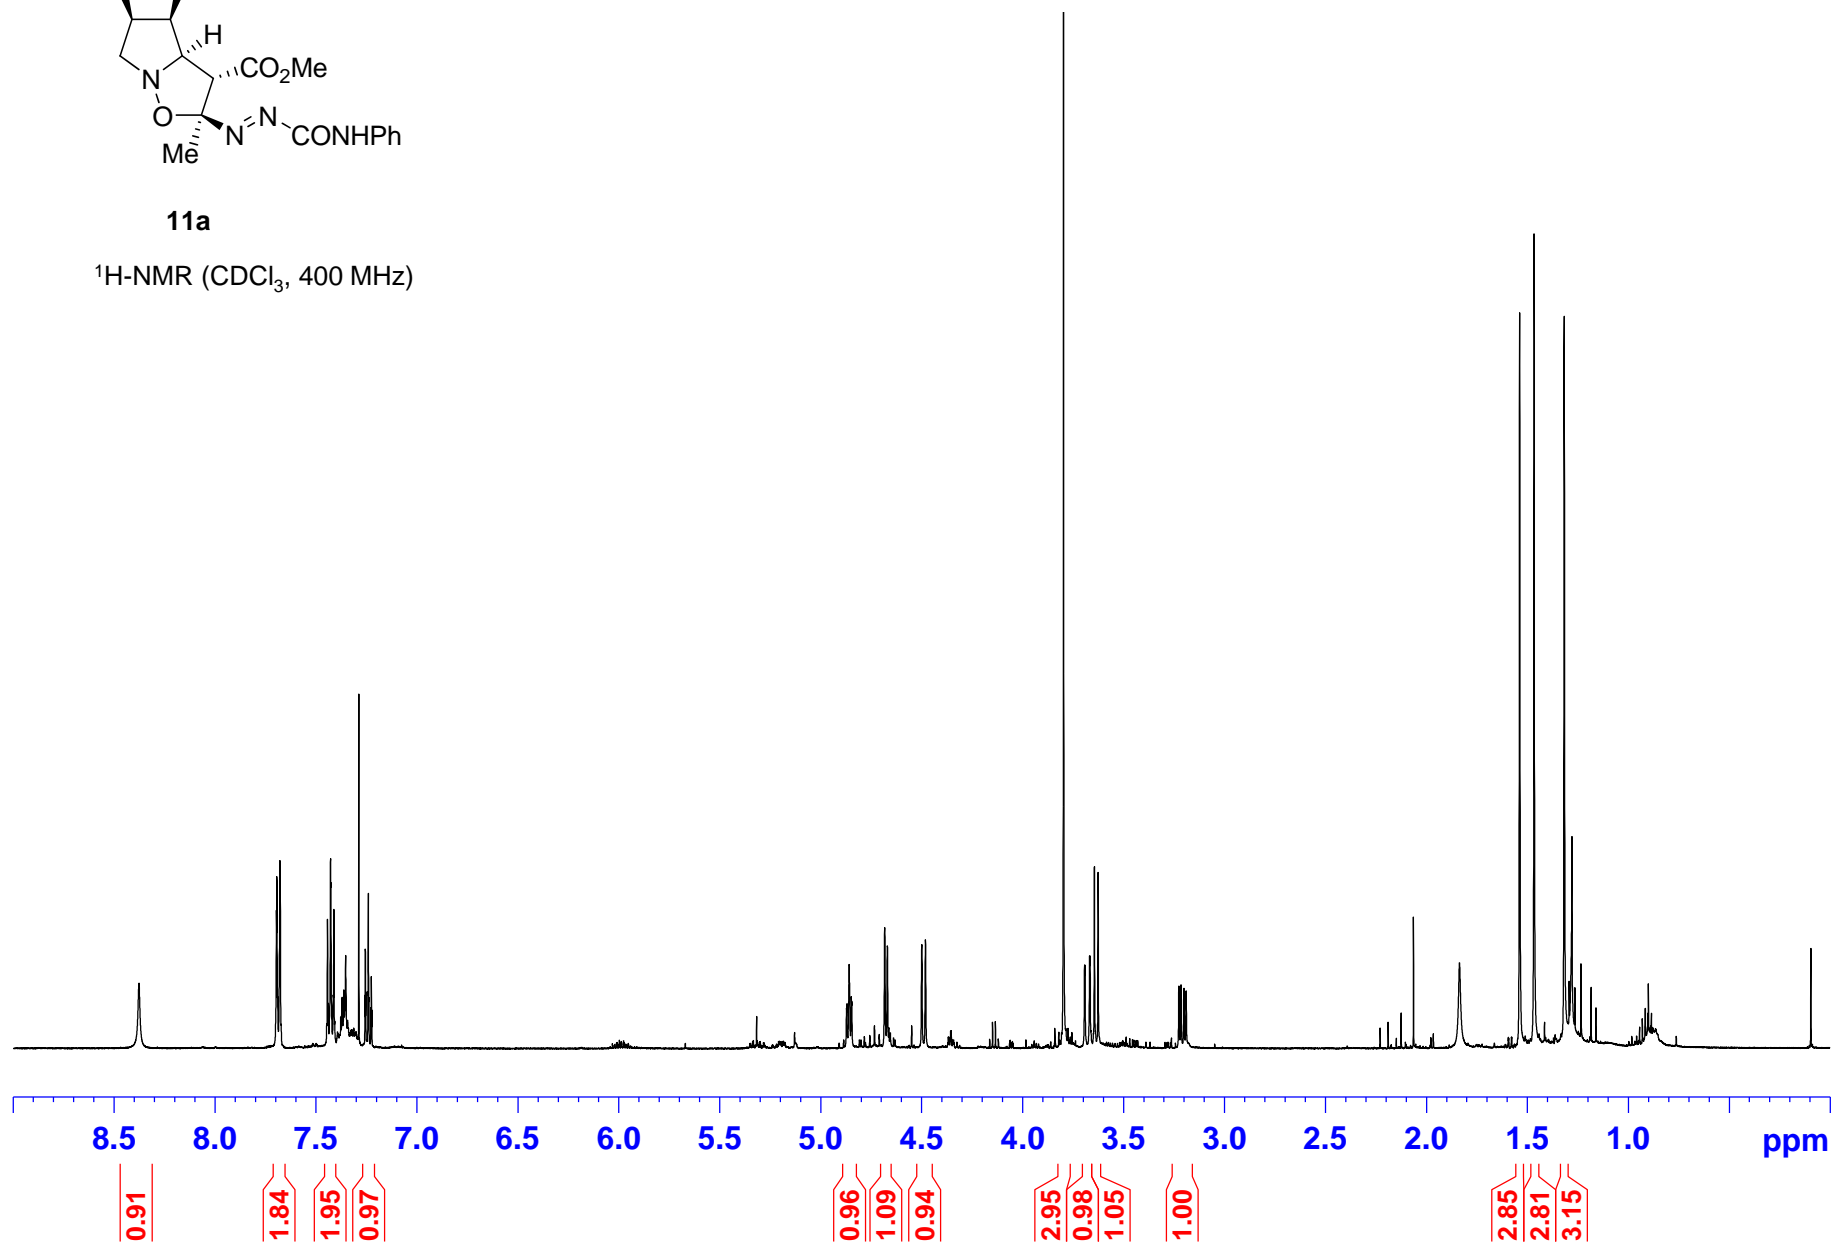



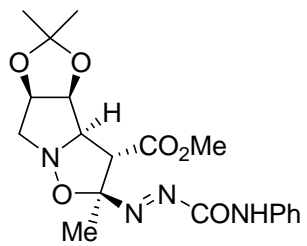

**11a**

<sup>13</sup>C-NMR (CDCl<sub>3</sub>, 100 MHz)

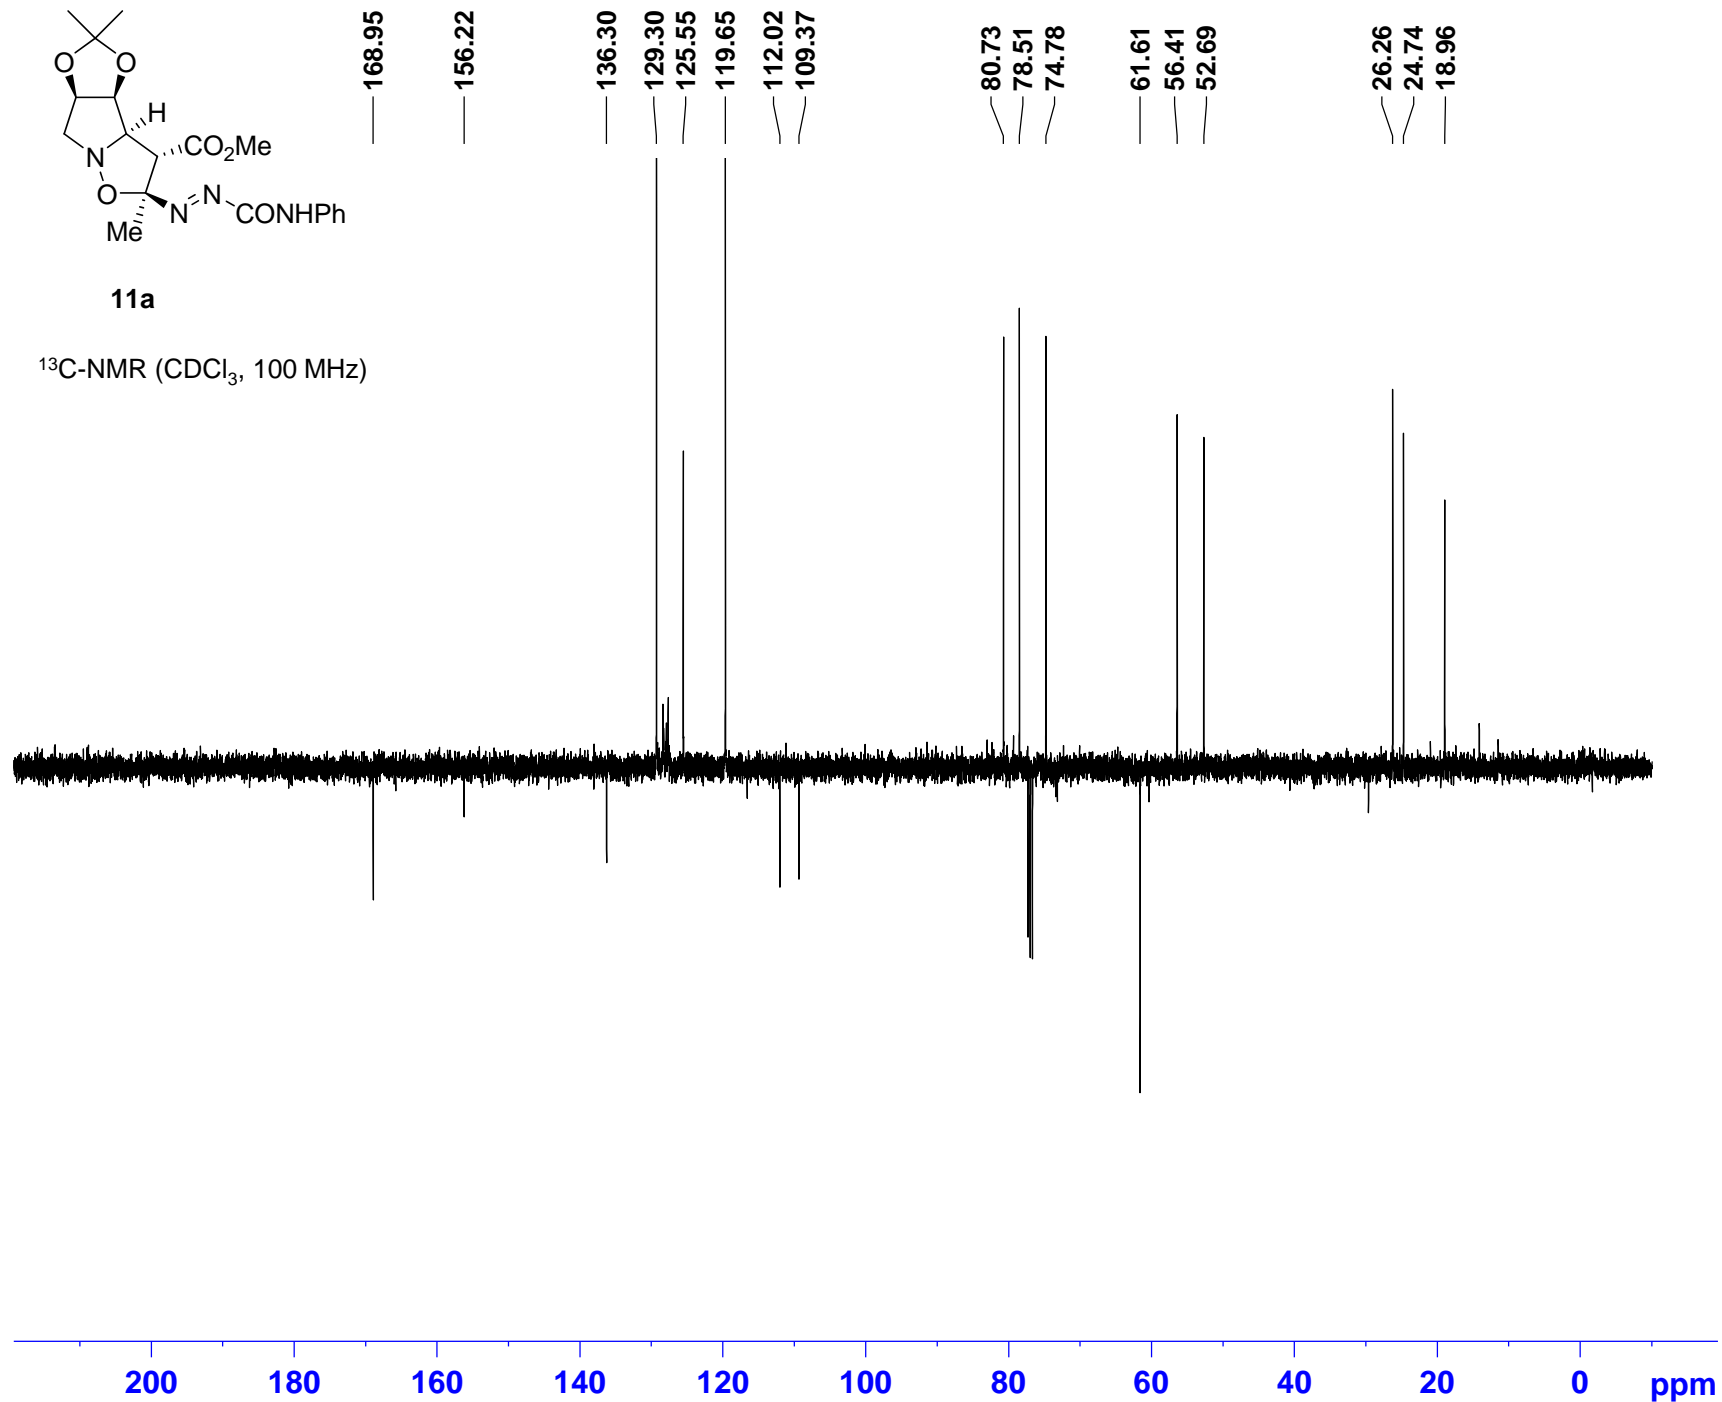

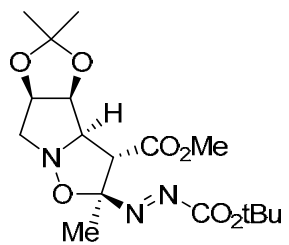

**11b**

<sup>1</sup>H-NMR (CDCl<sub>3</sub>, 400 MHz)

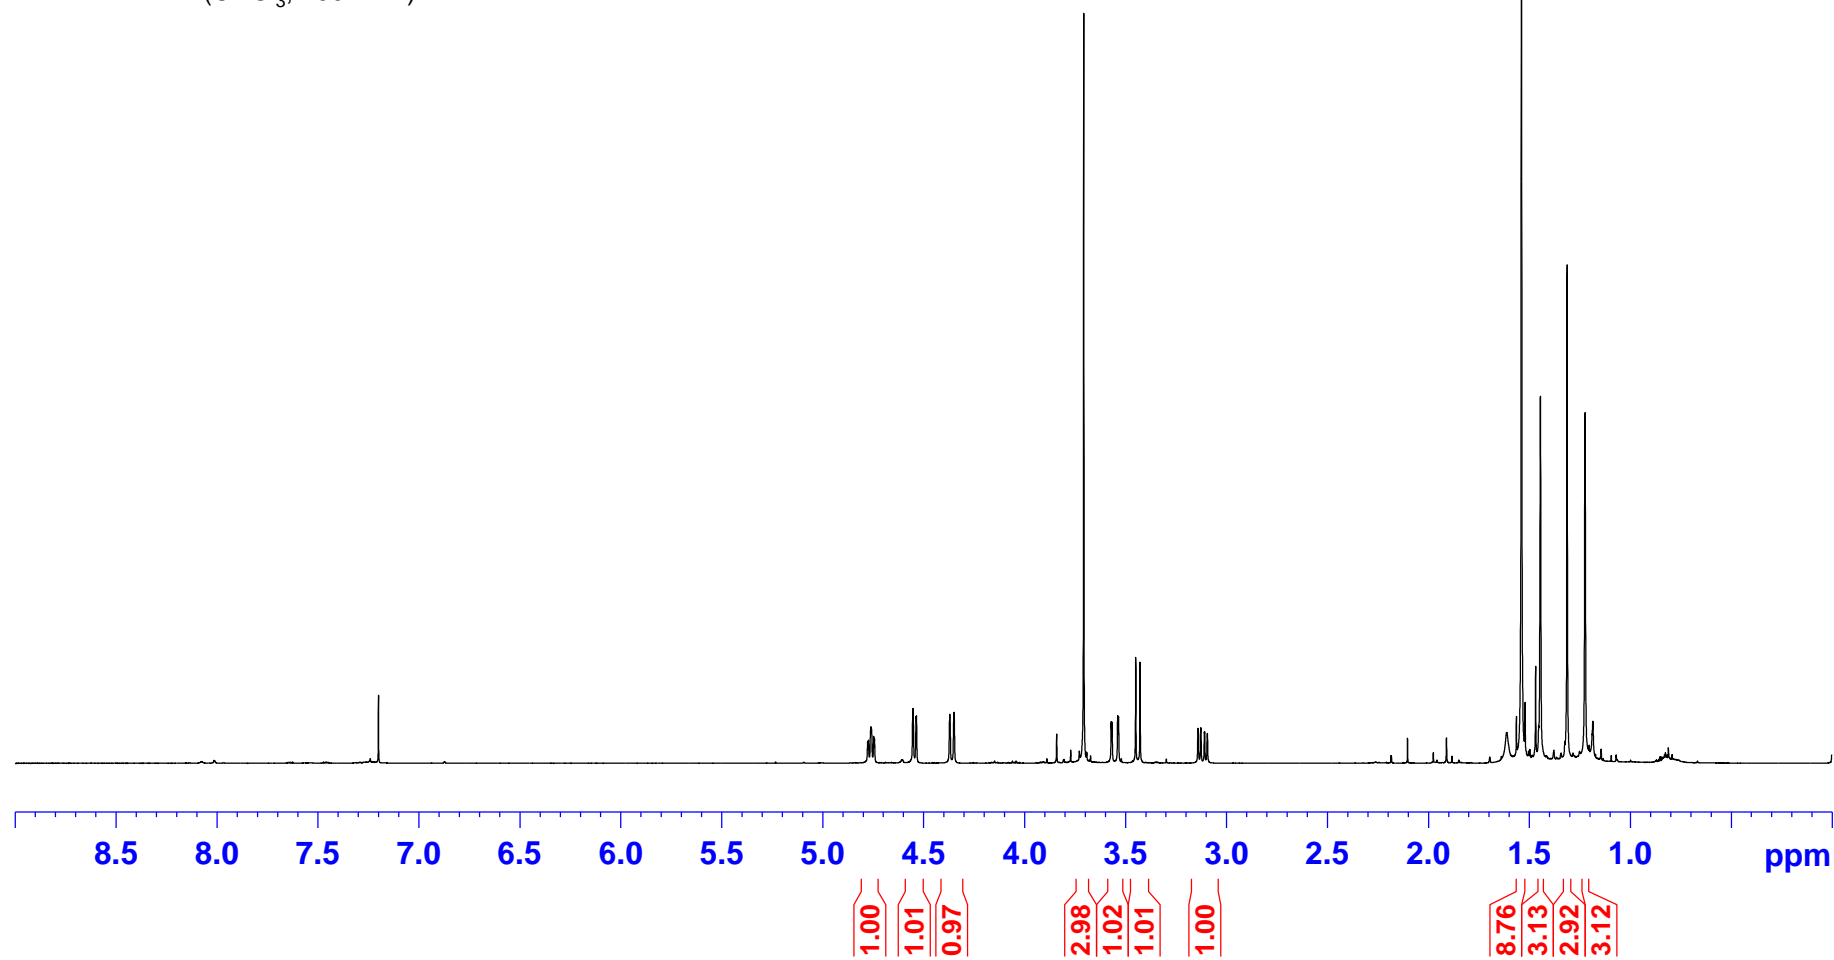

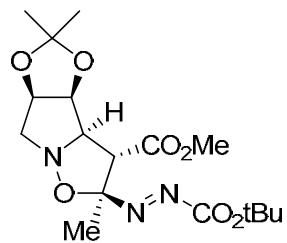

**11b**

<sup>13</sup>C-NMR (CDCl<sub>3</sub>, 100 MHz)

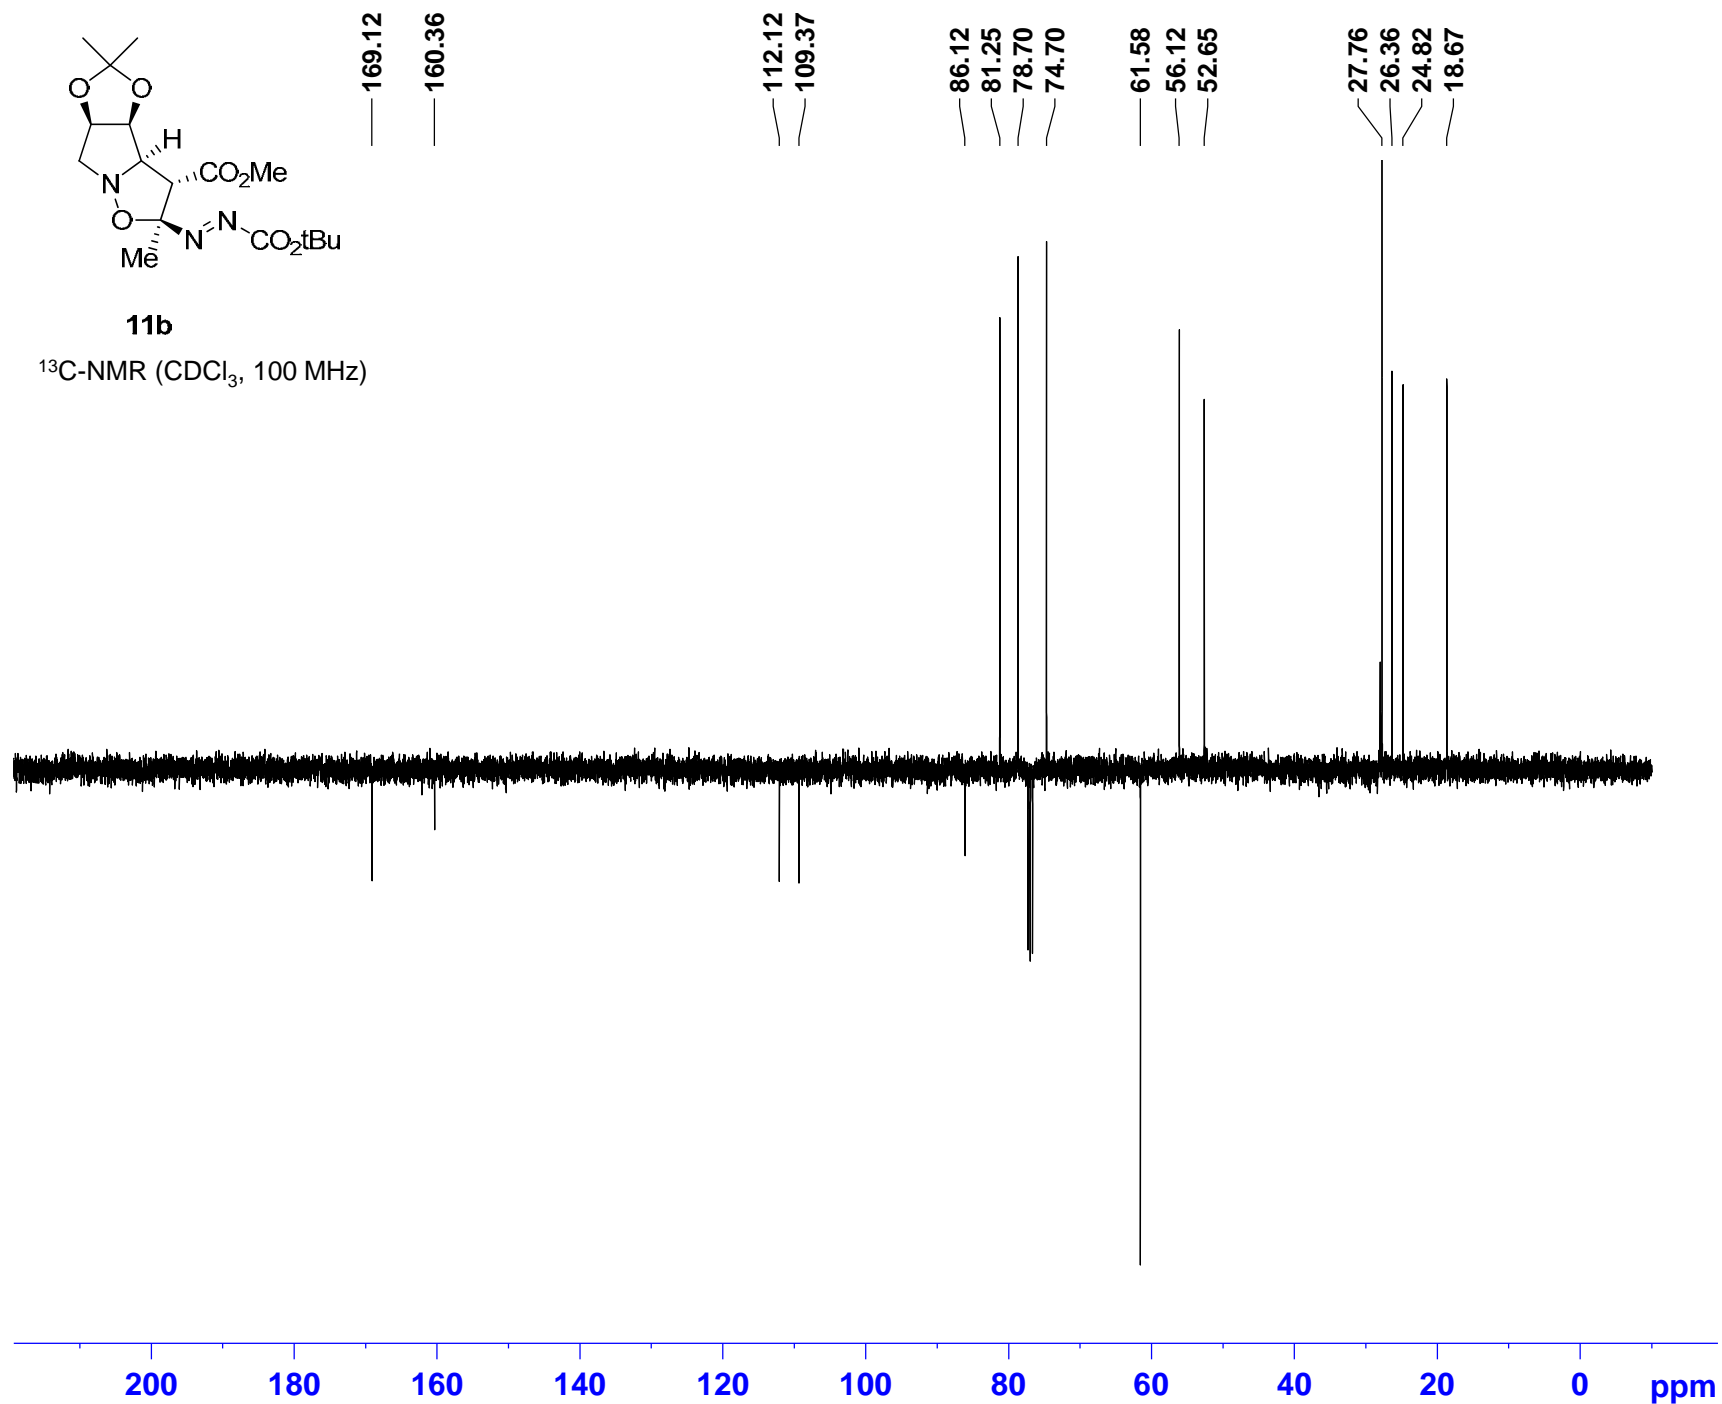



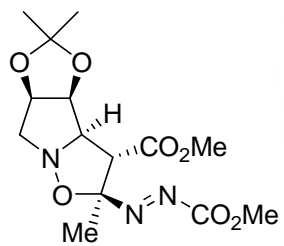

**11d**

<sup>13</sup>C-NMR (CDCl<sub>3</sub>, 100 MHz)

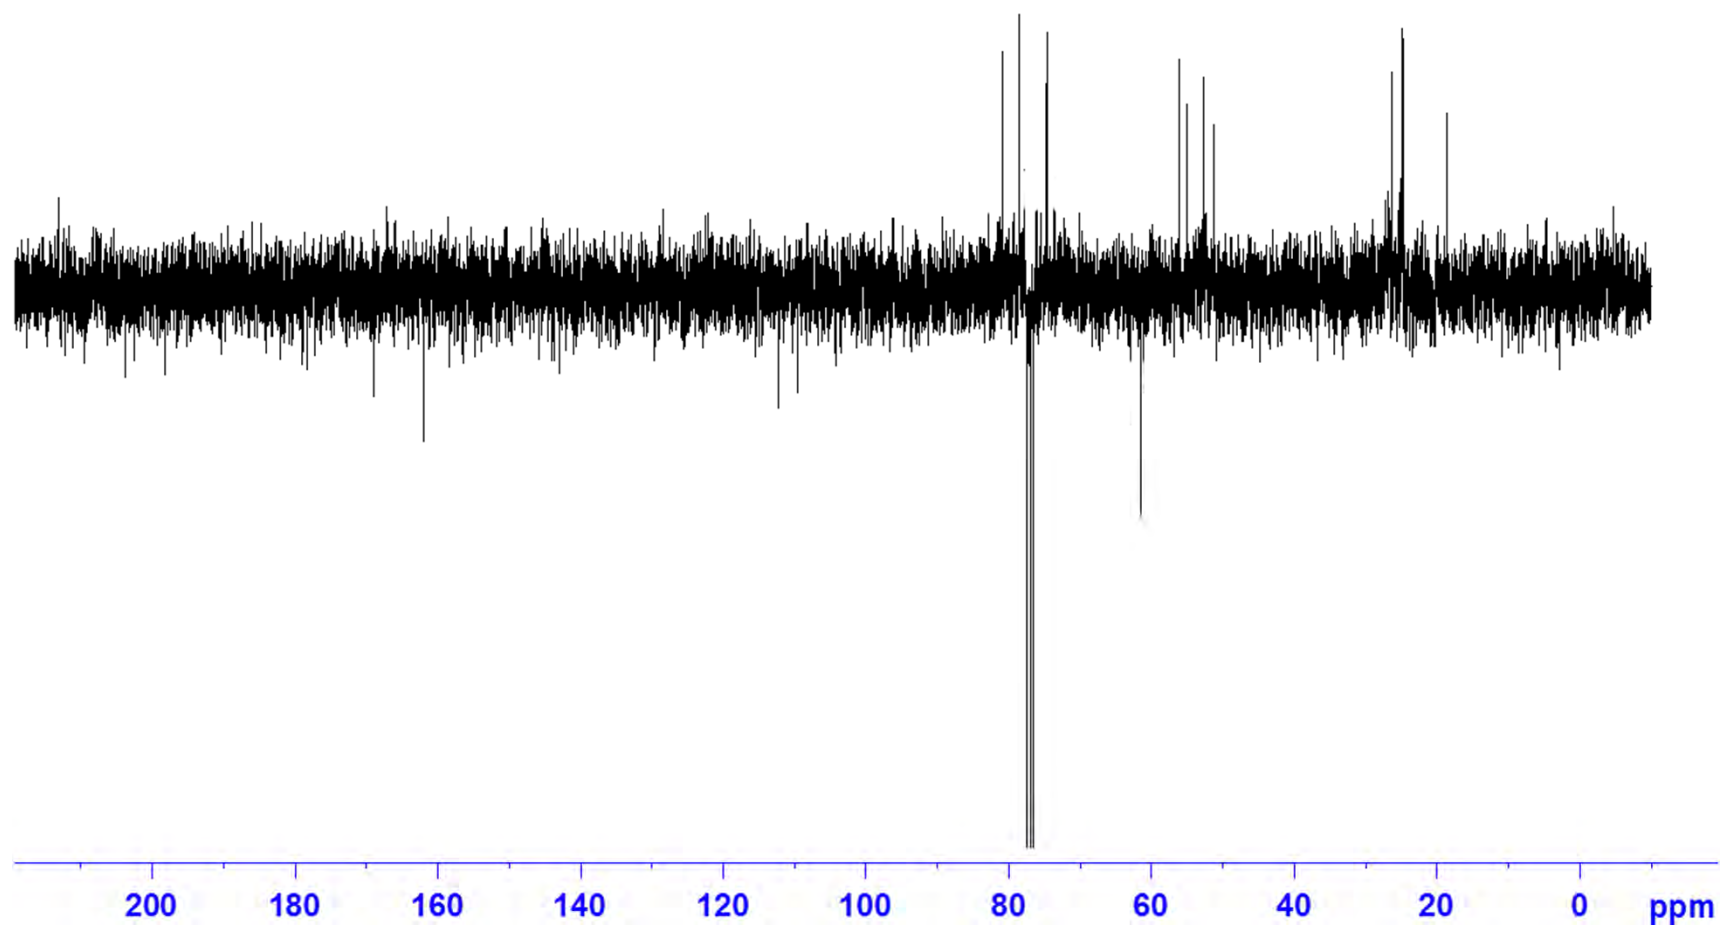

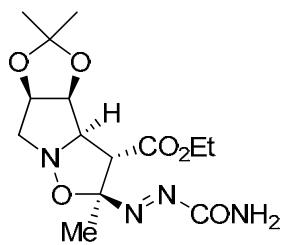

**11e**

<sup>1</sup>H-NMR (CDCl<sub>3</sub>, 400 MHz)

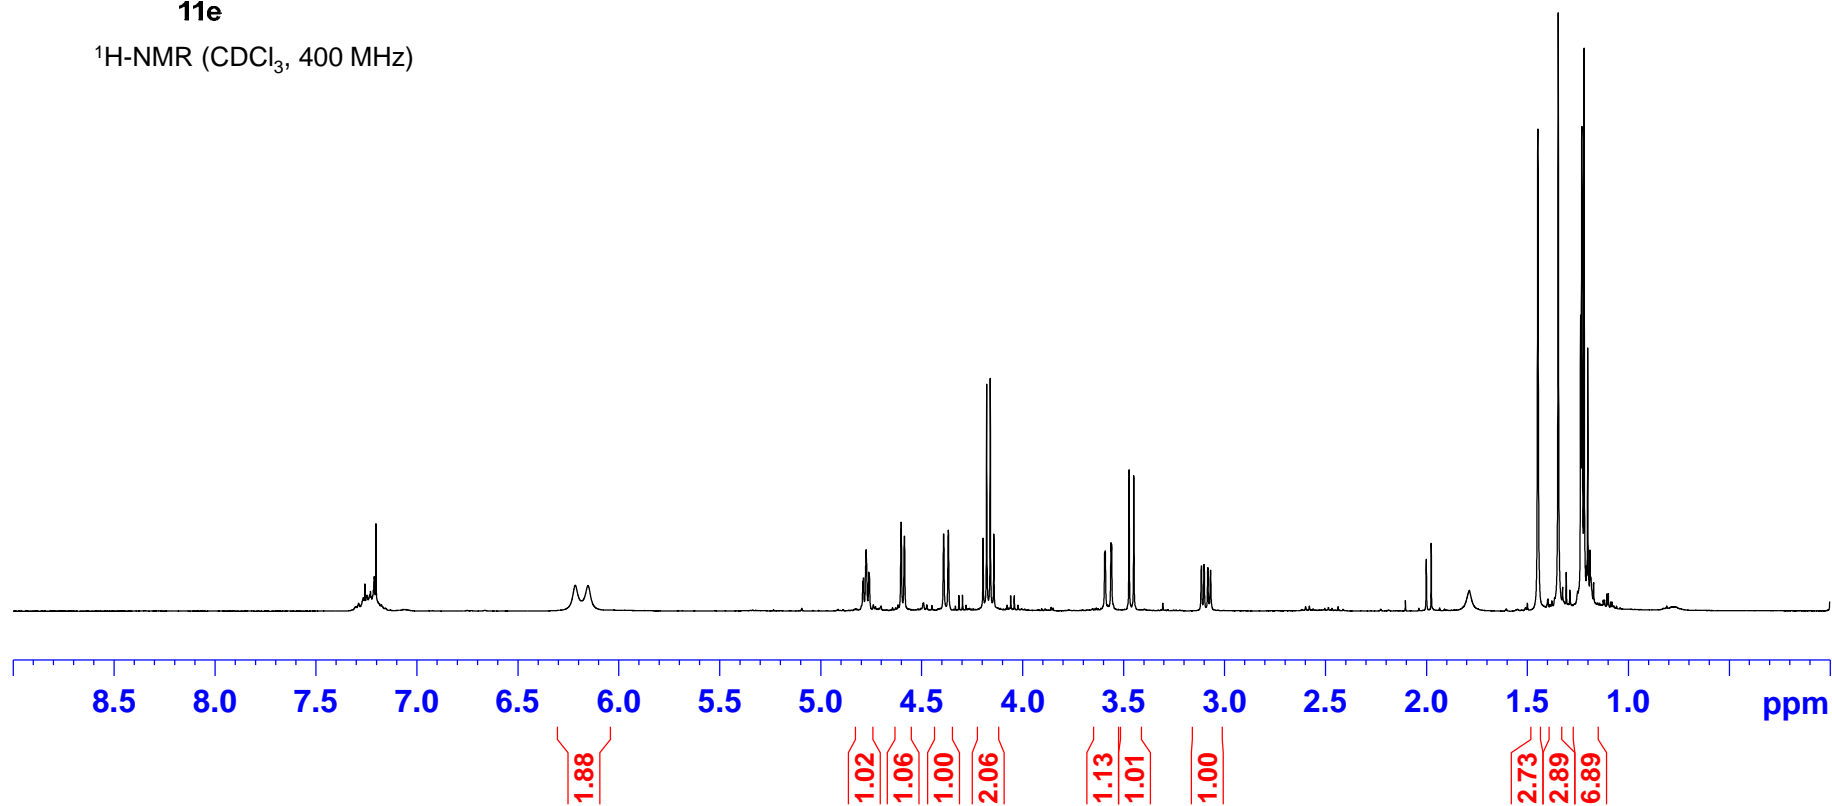

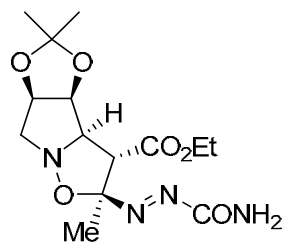

**11e**

$^{13}\text{C}$ -NMR ( $\text{CDCl}_3$ , 100 MHz)

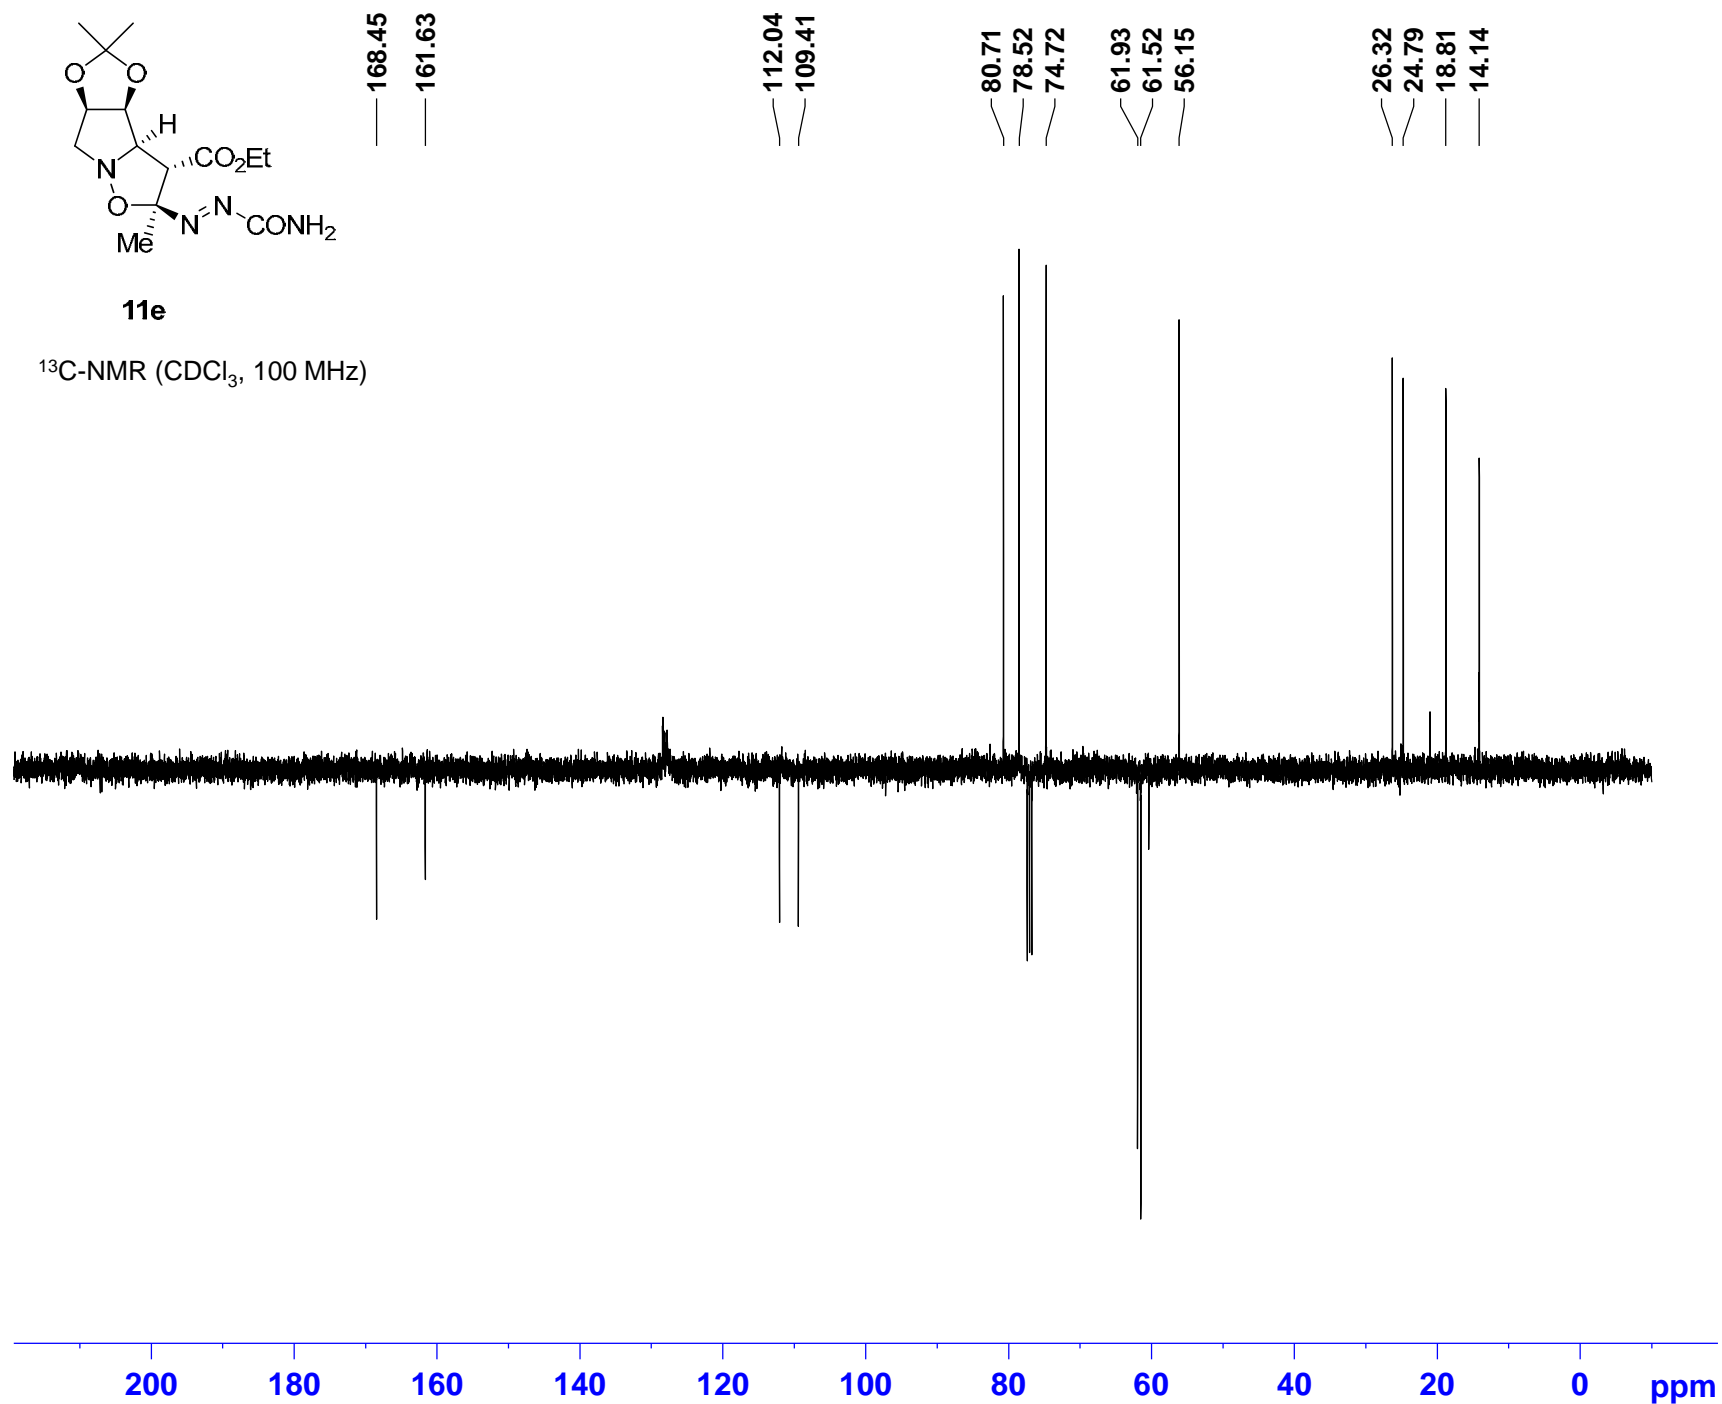

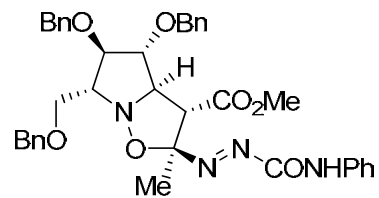

12a

<sup>1</sup>H-NMR (CDCl<sub>3</sub>, 400 MHz)

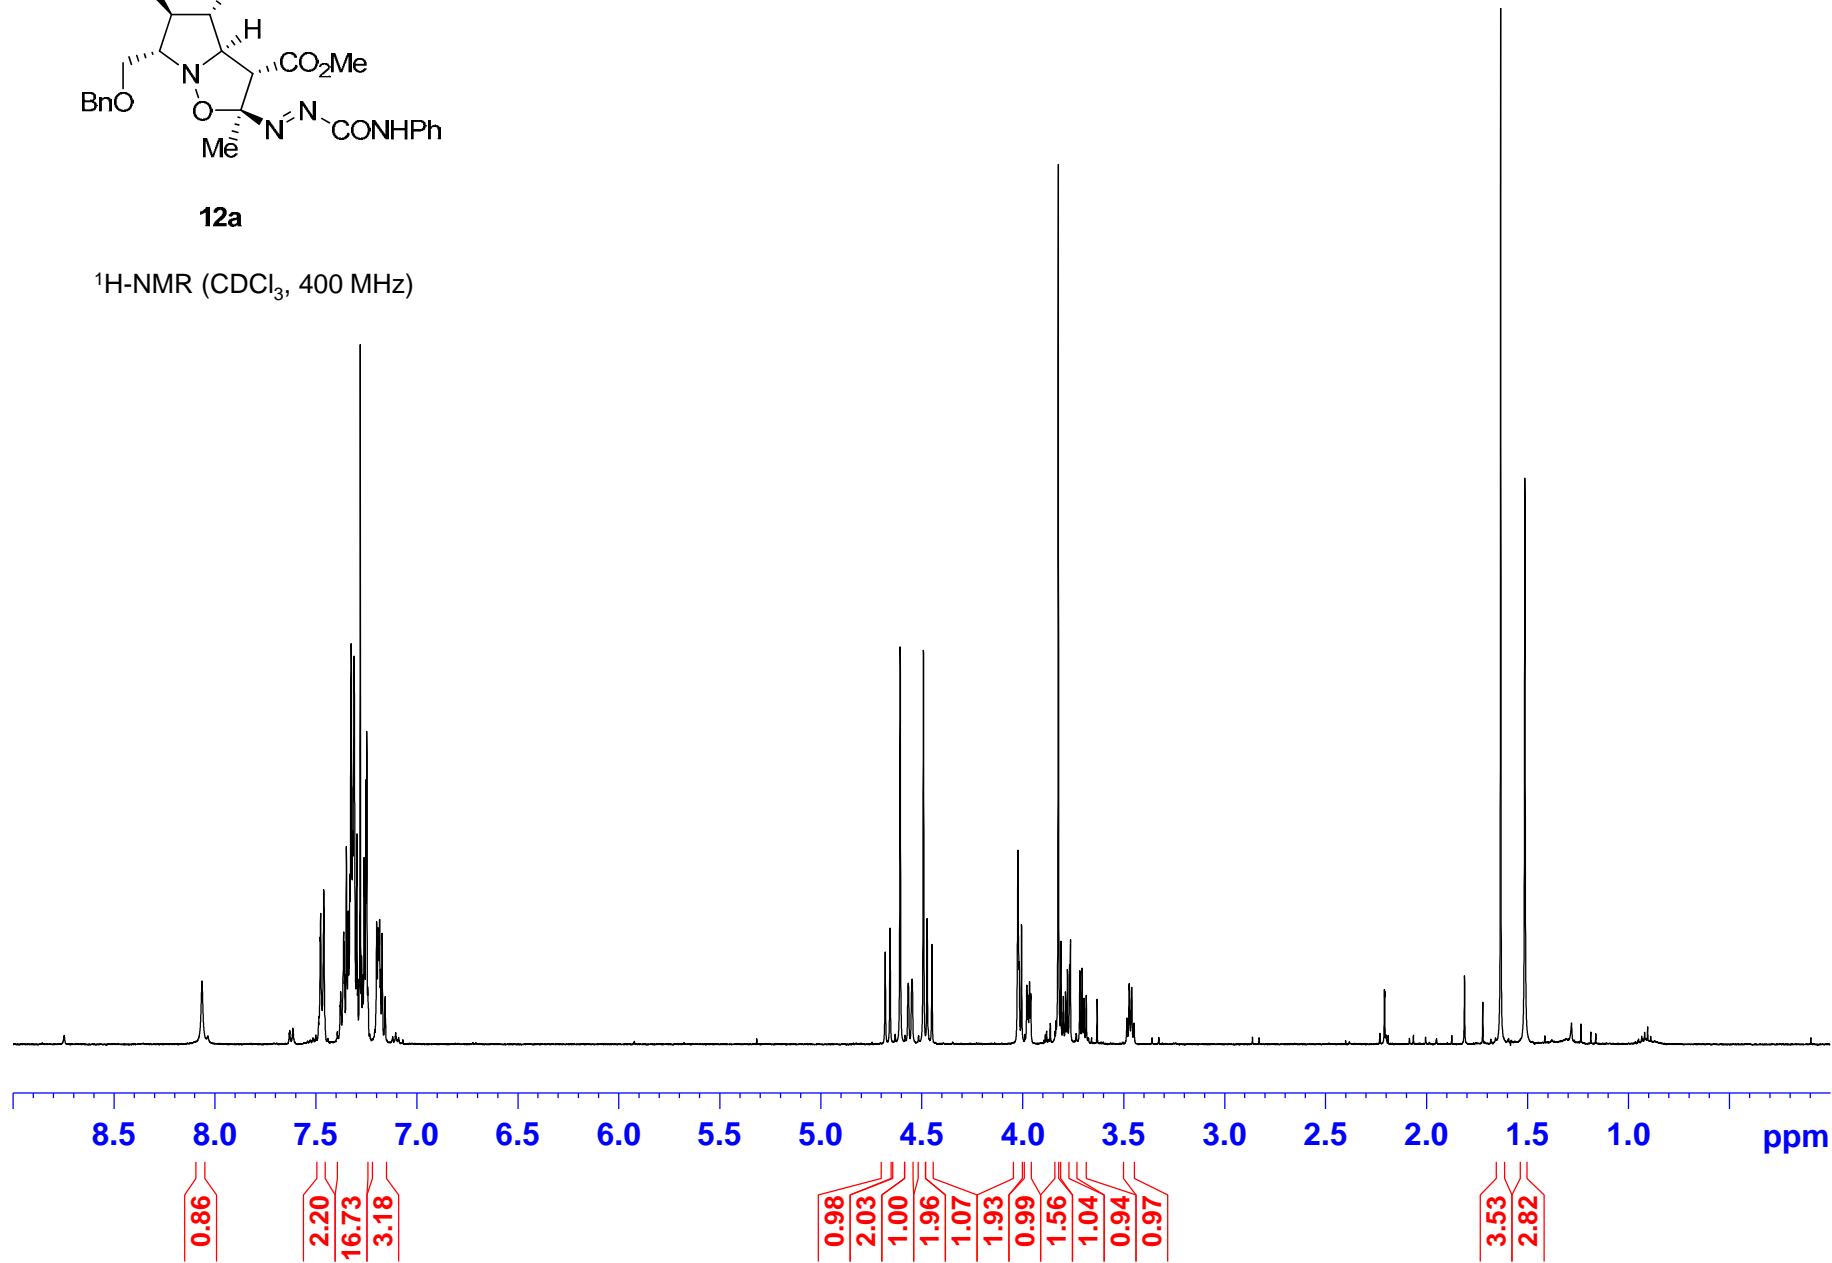



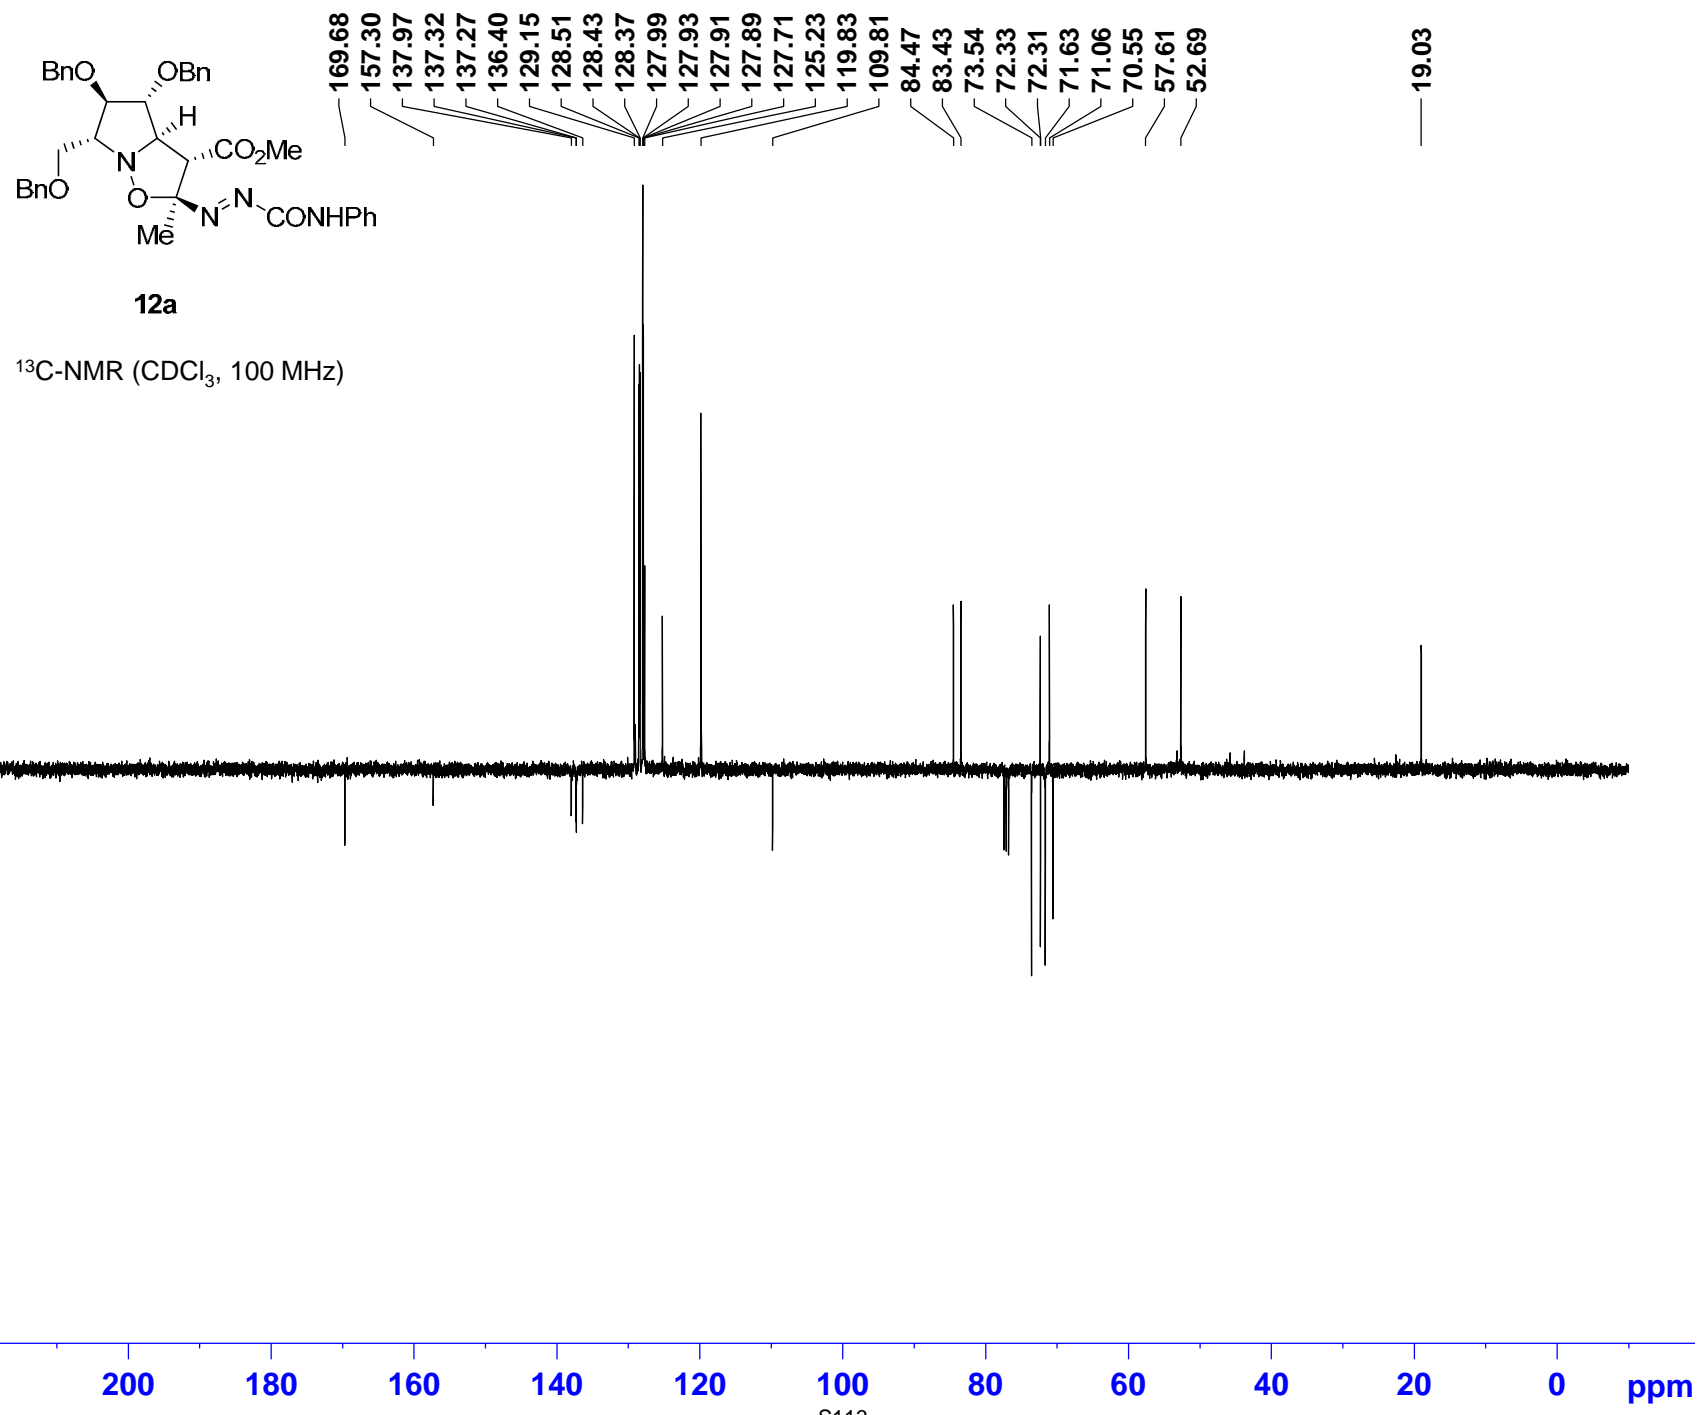

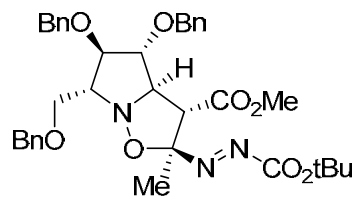

**12b**

<sup>1</sup>H-NMR (CDCl<sub>3</sub>, 400 MHz)

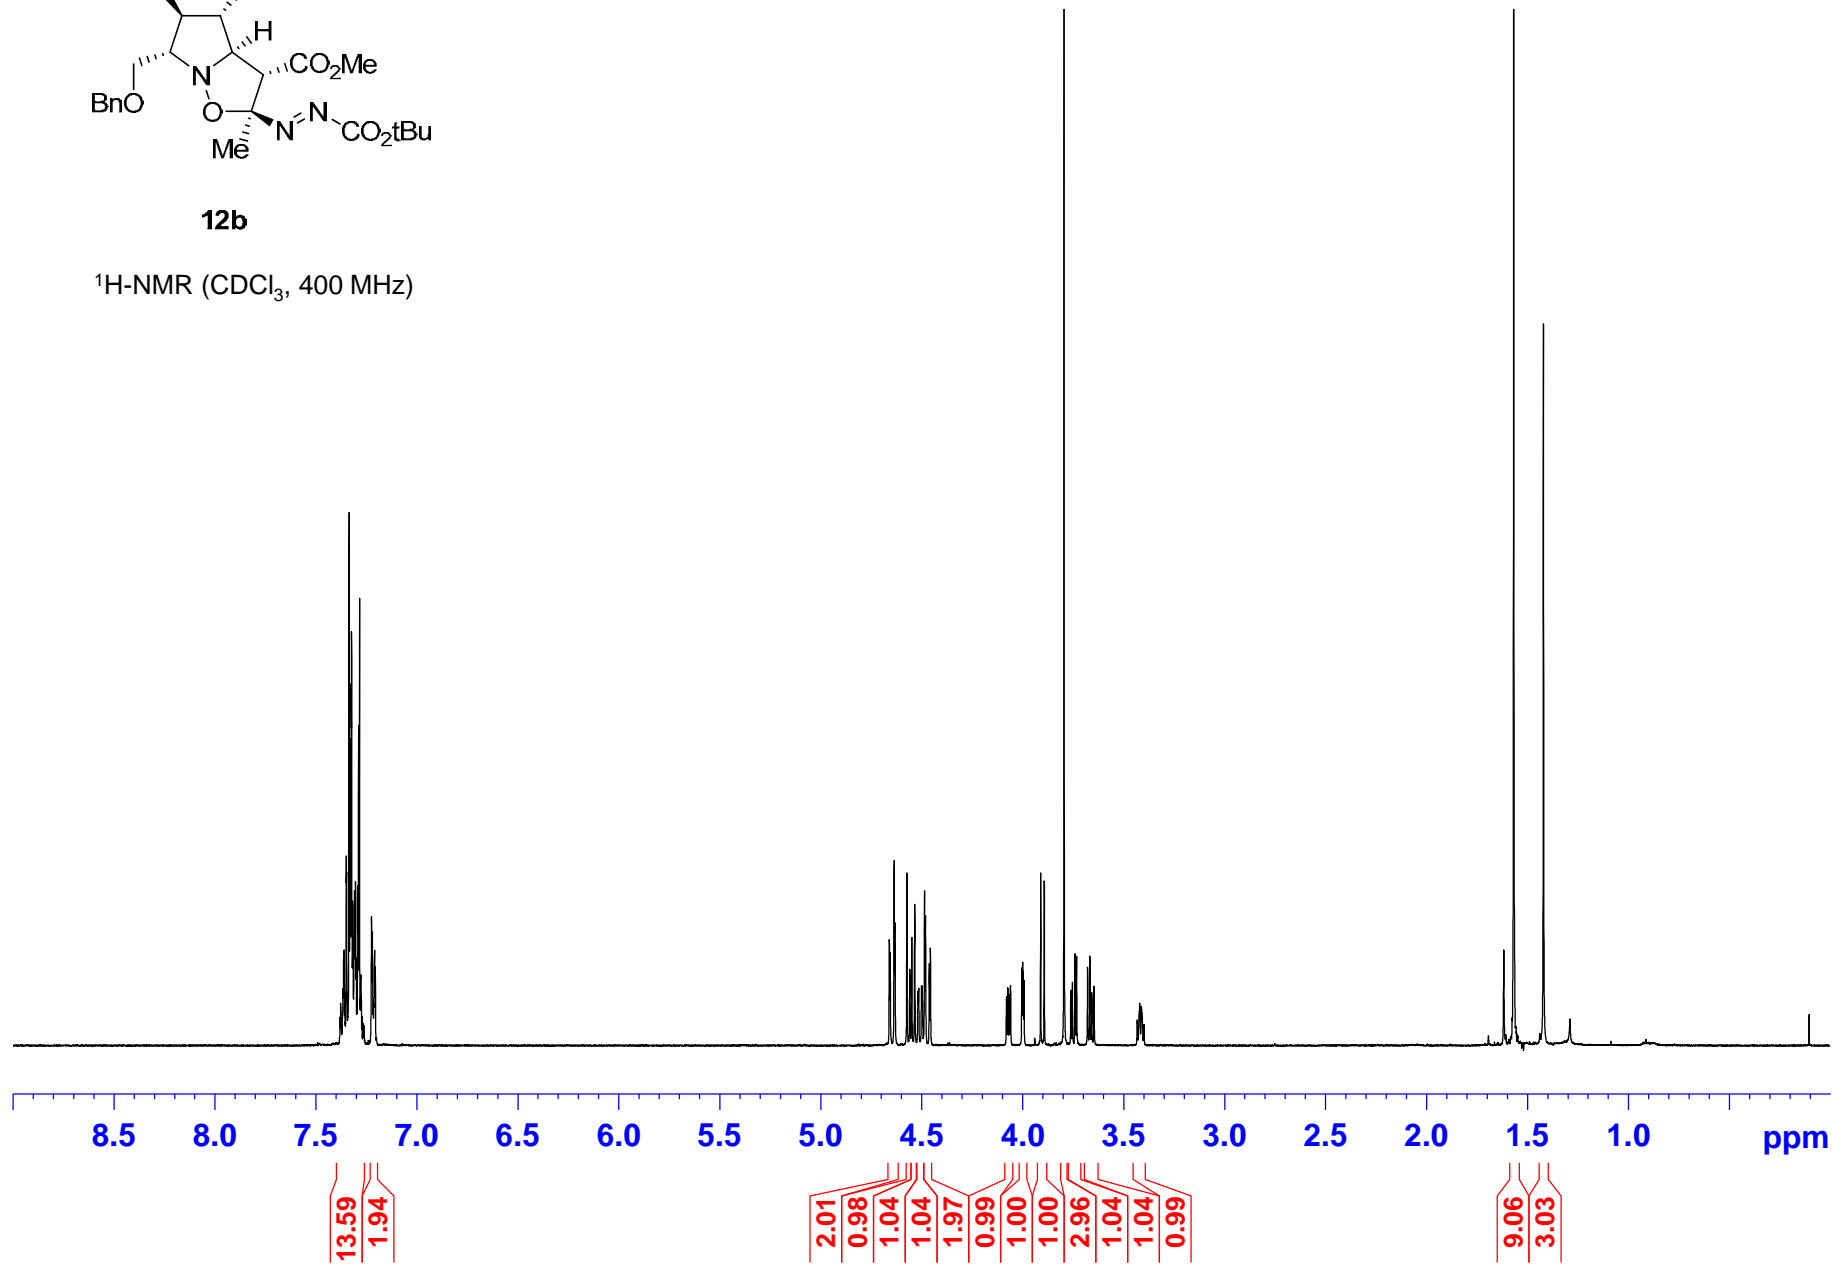

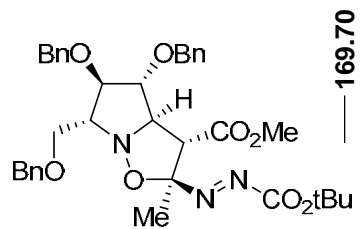

12b

<sup>13</sup>C-NMR (CDCl<sub>3</sub>, 100 MHz)

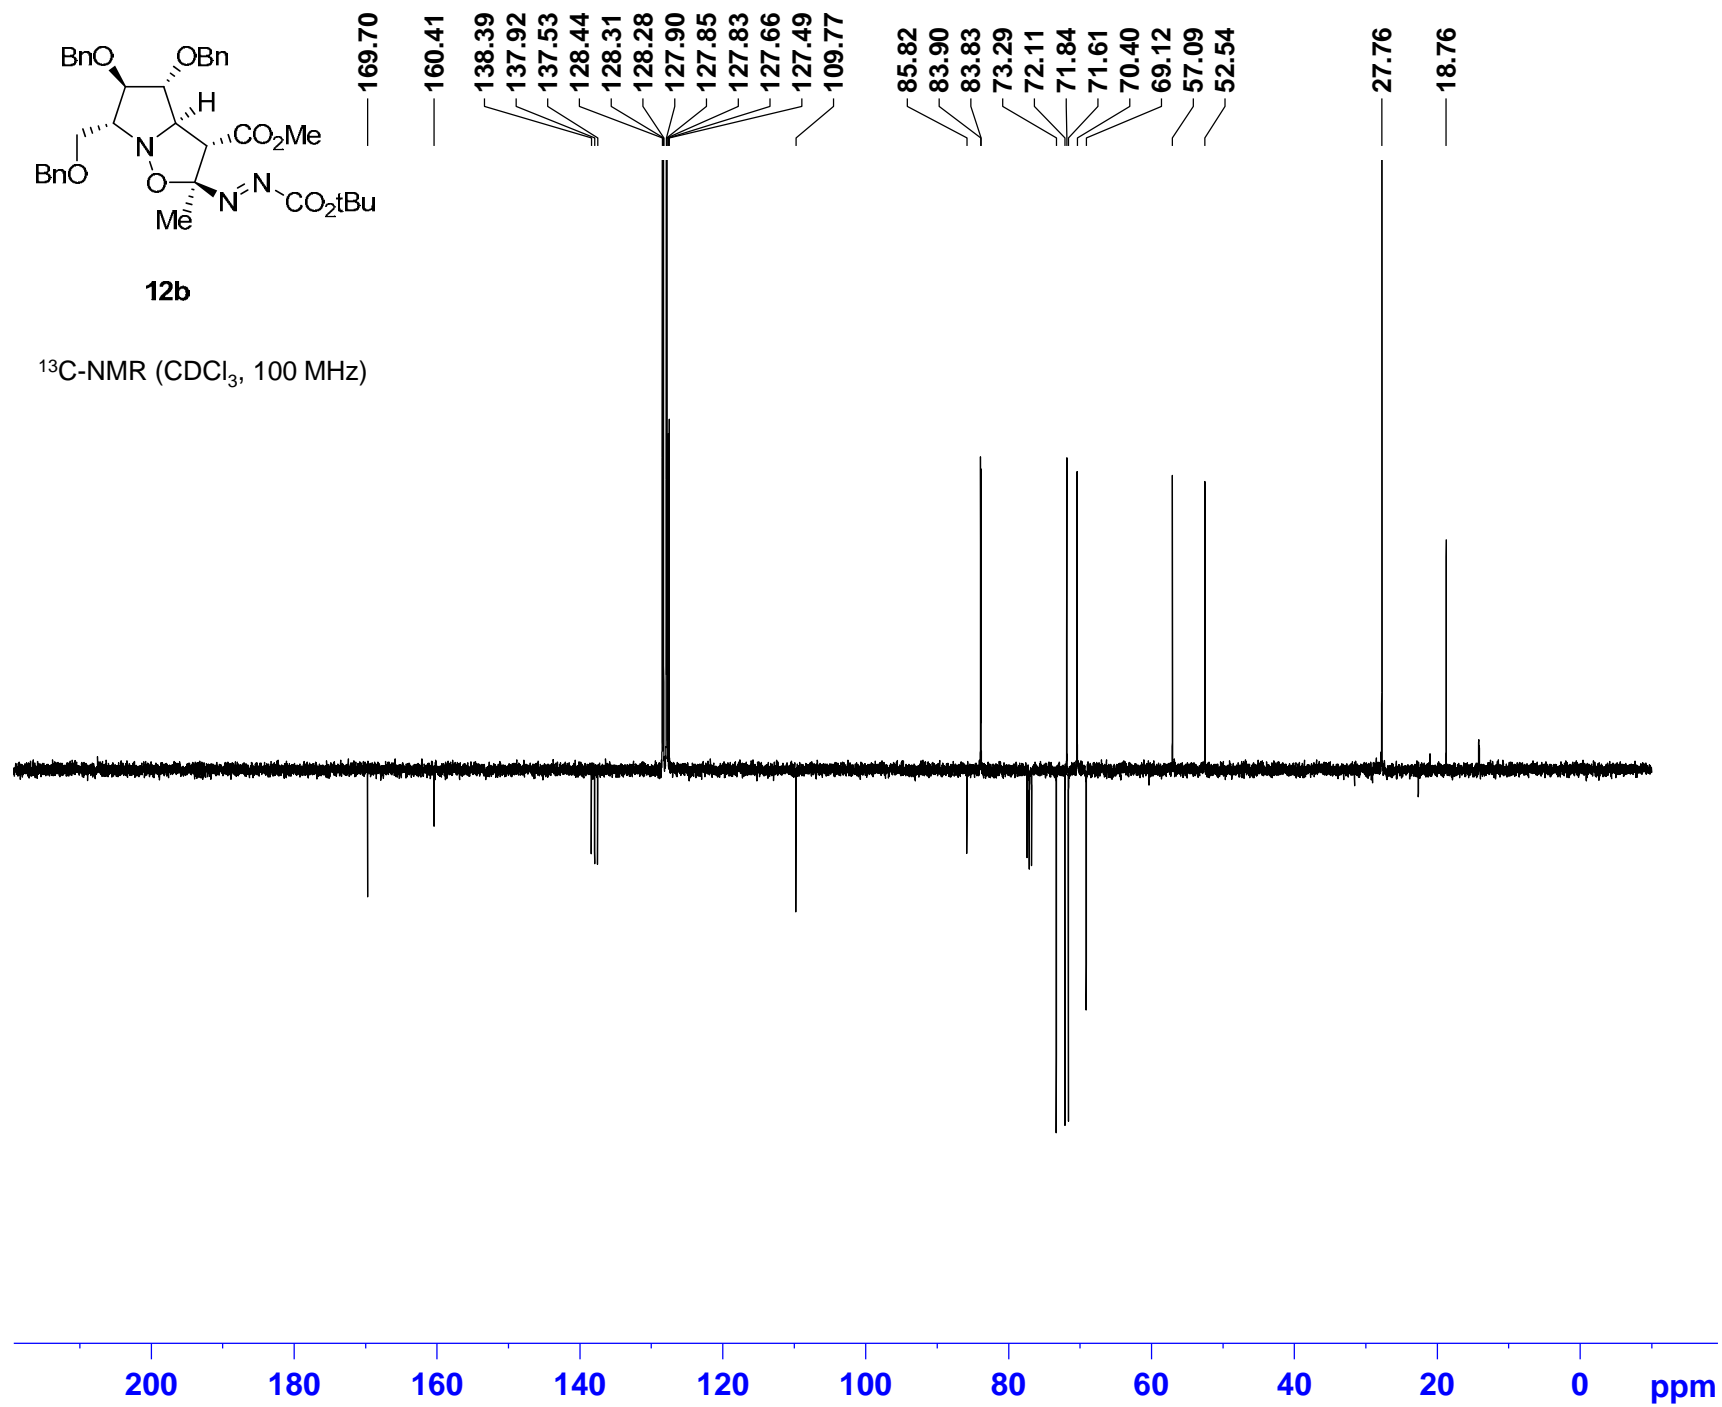

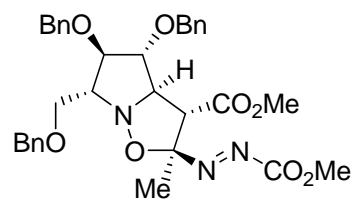

12d

<sup>1</sup>H-NMR (CDCl<sub>3</sub>, 400 MHz)

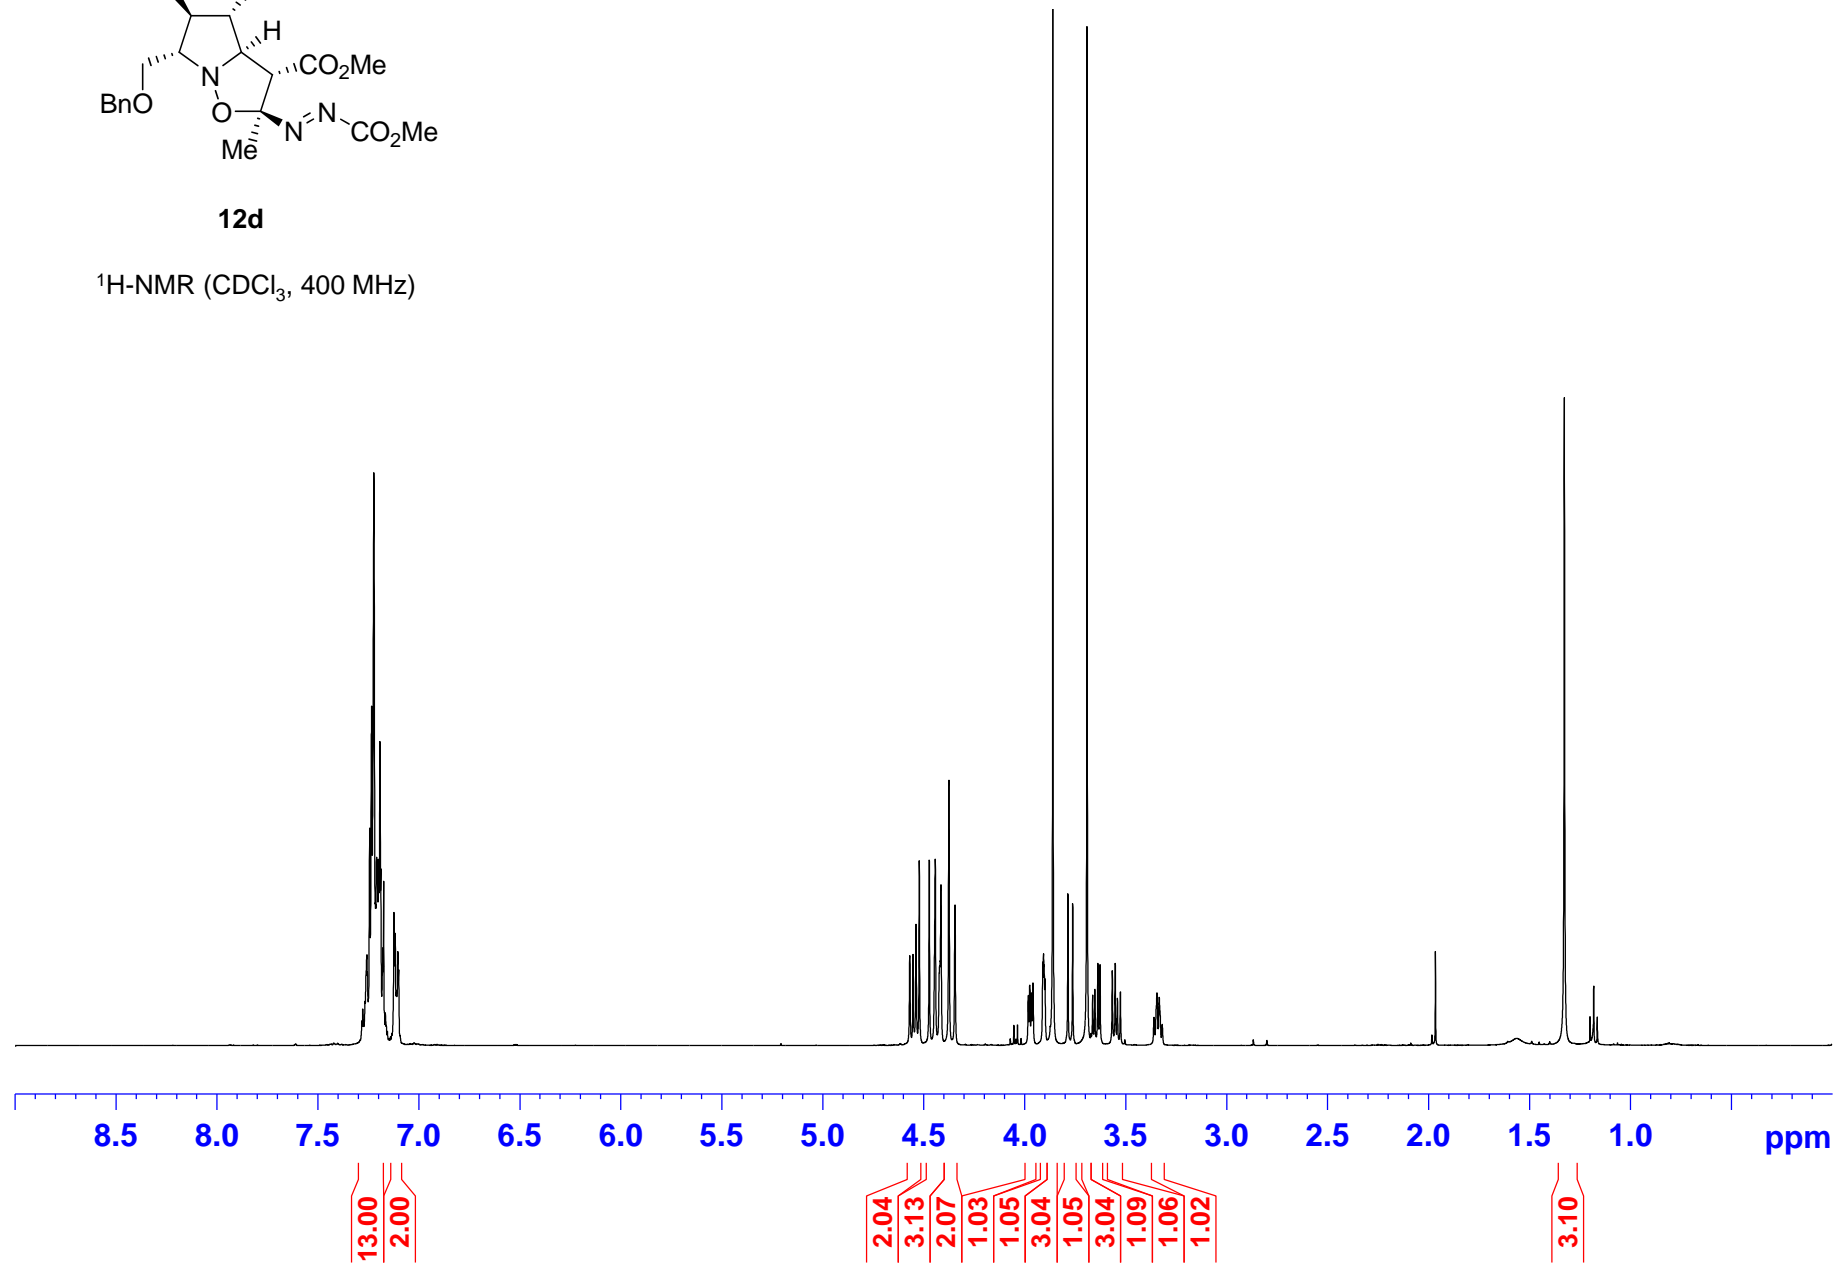

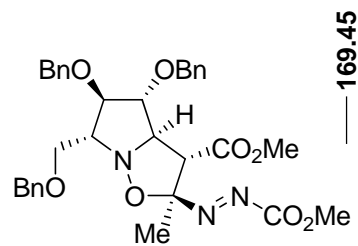

**12d**

<sup>13</sup>C-NMR (CDCl<sub>3</sub>, 100 MHz)

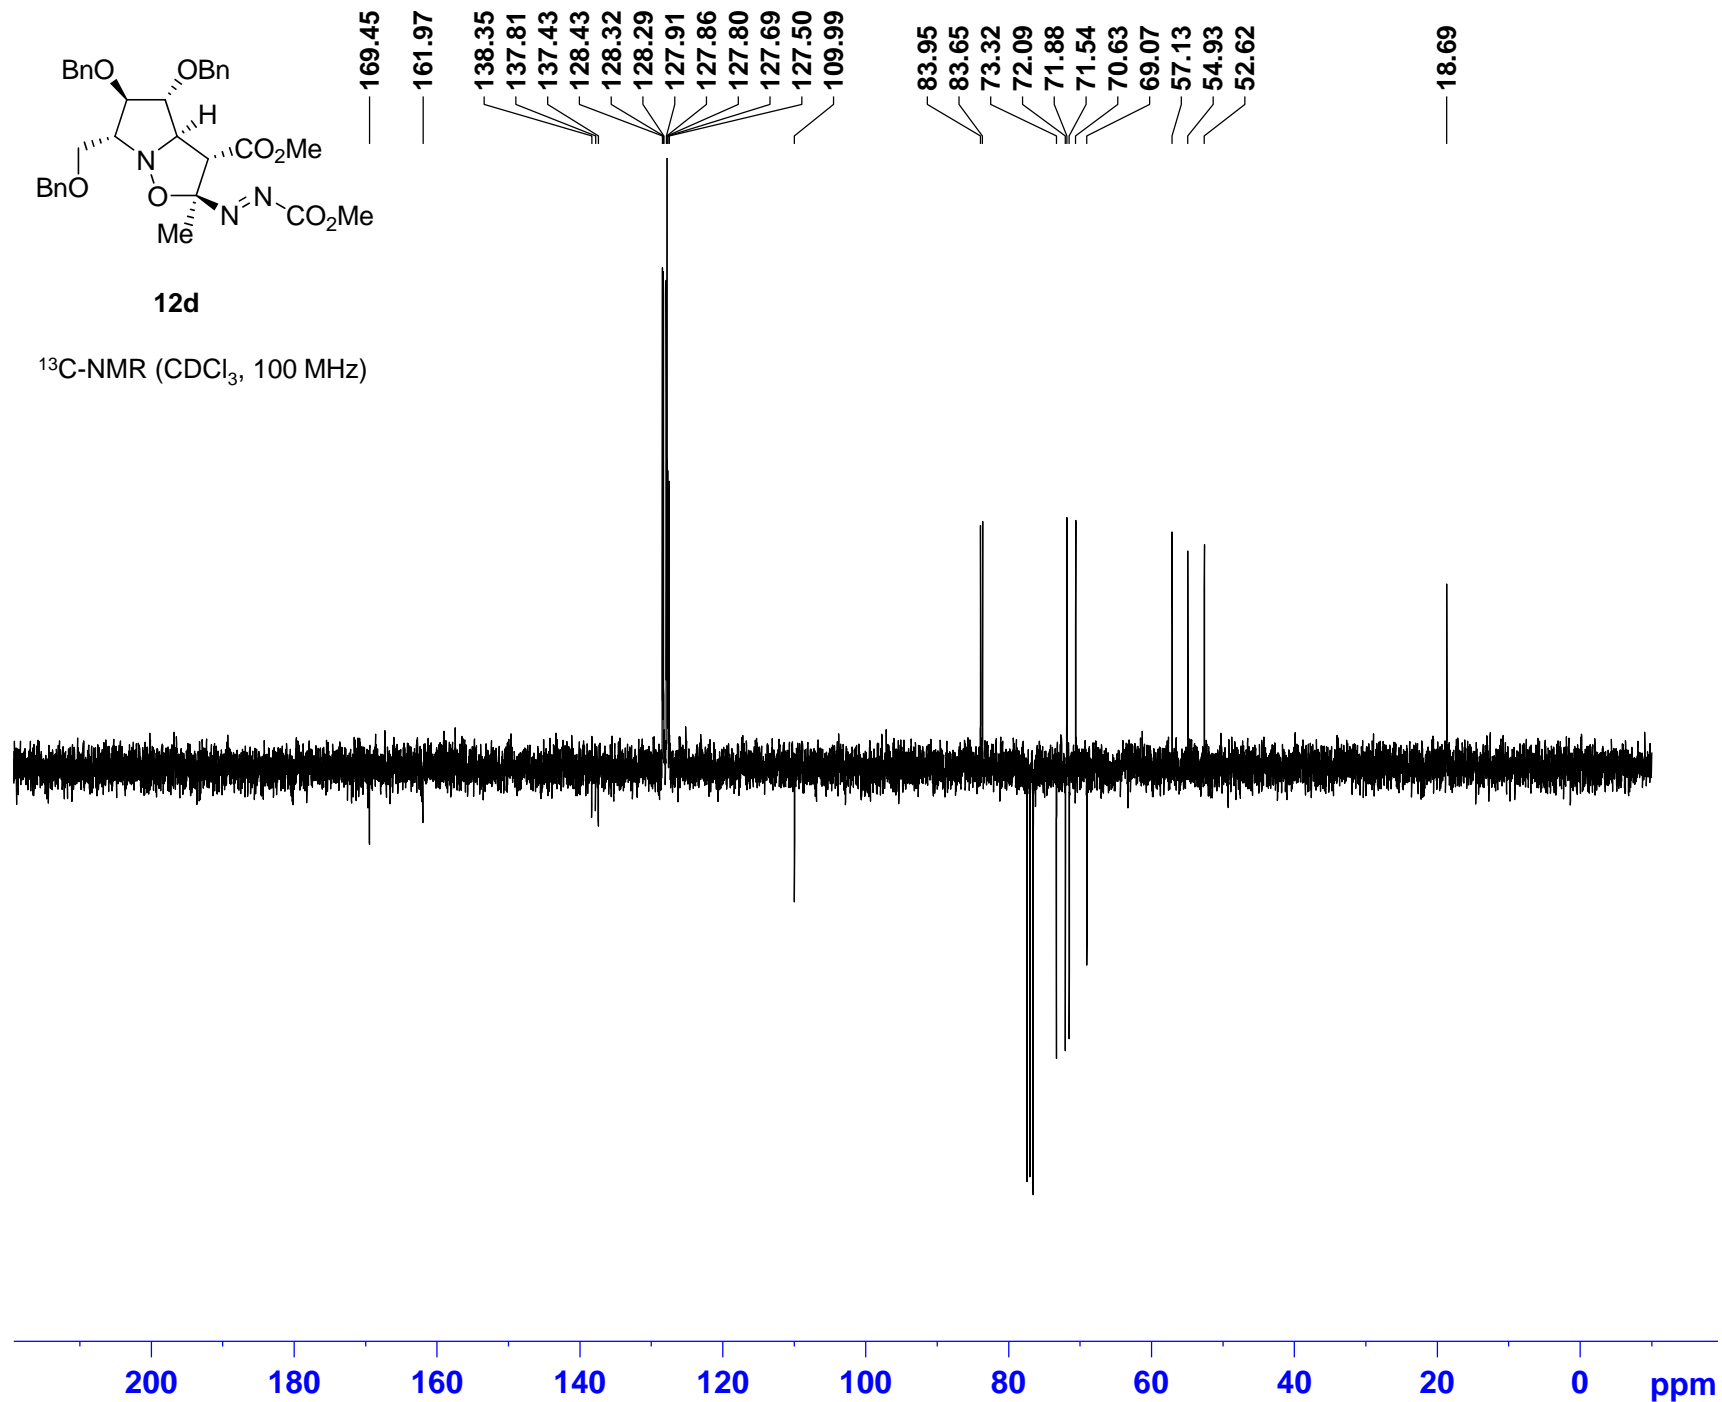

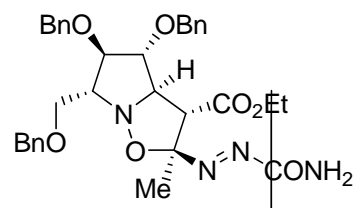

12e

<sup>1</sup>H-NMR (CDCl<sub>3</sub>, 400 MHz)

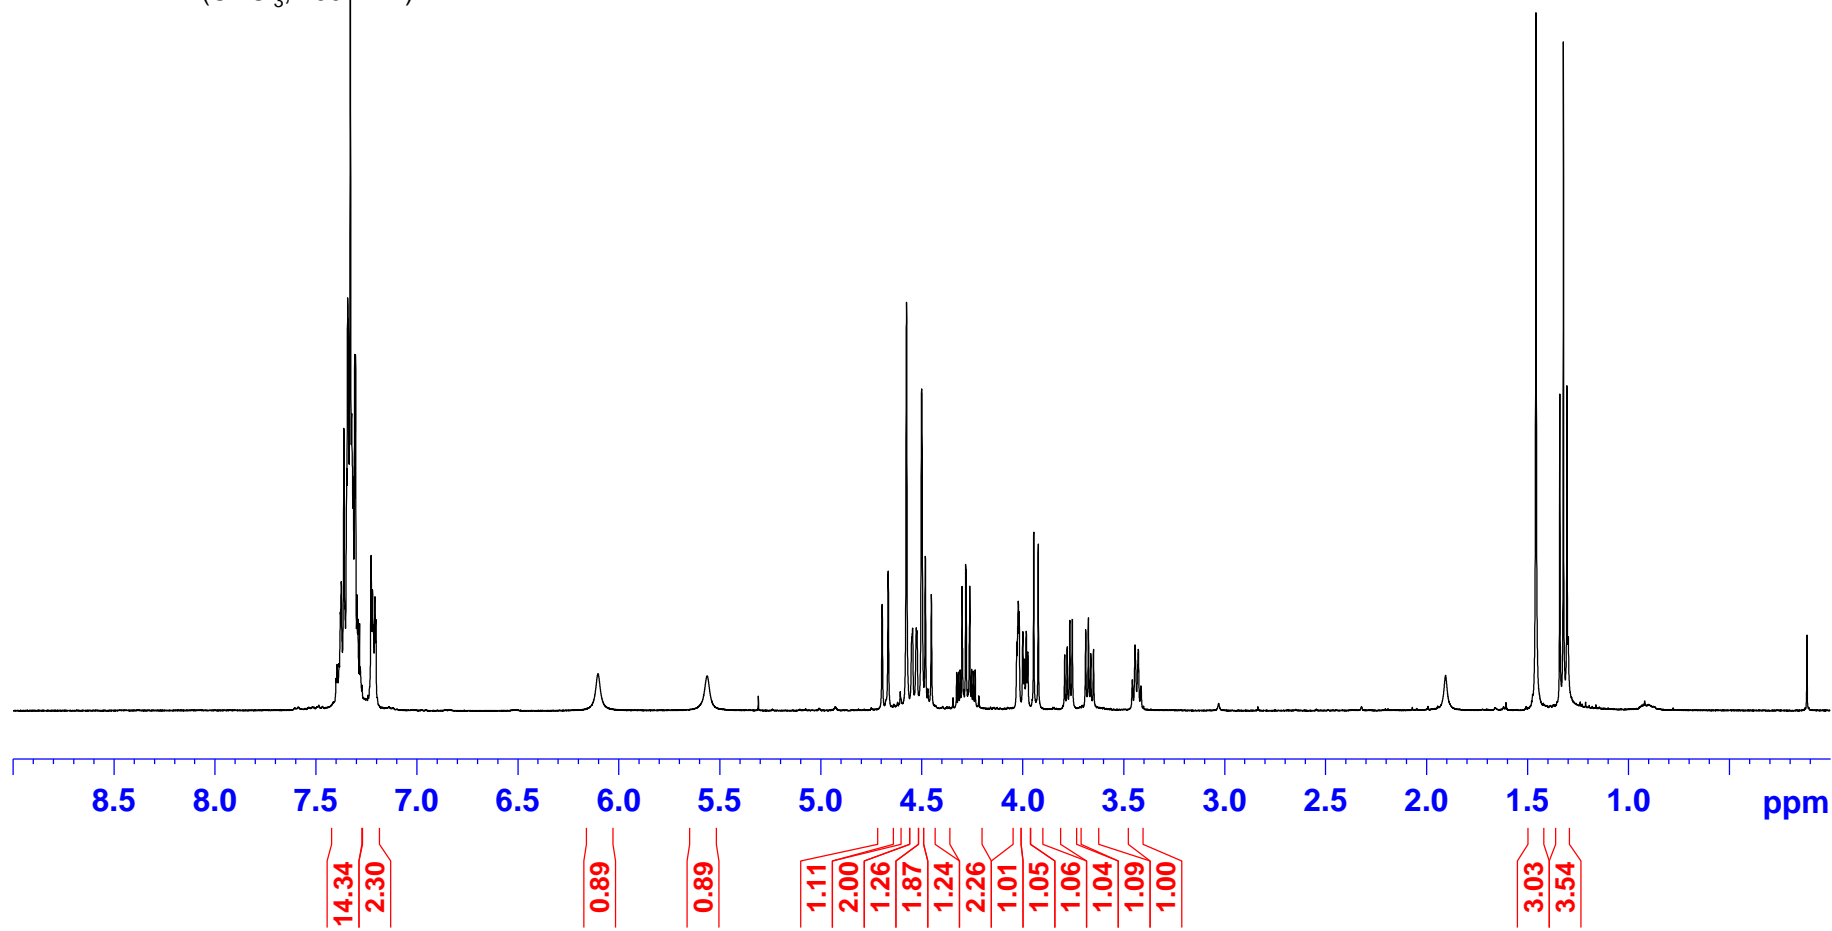

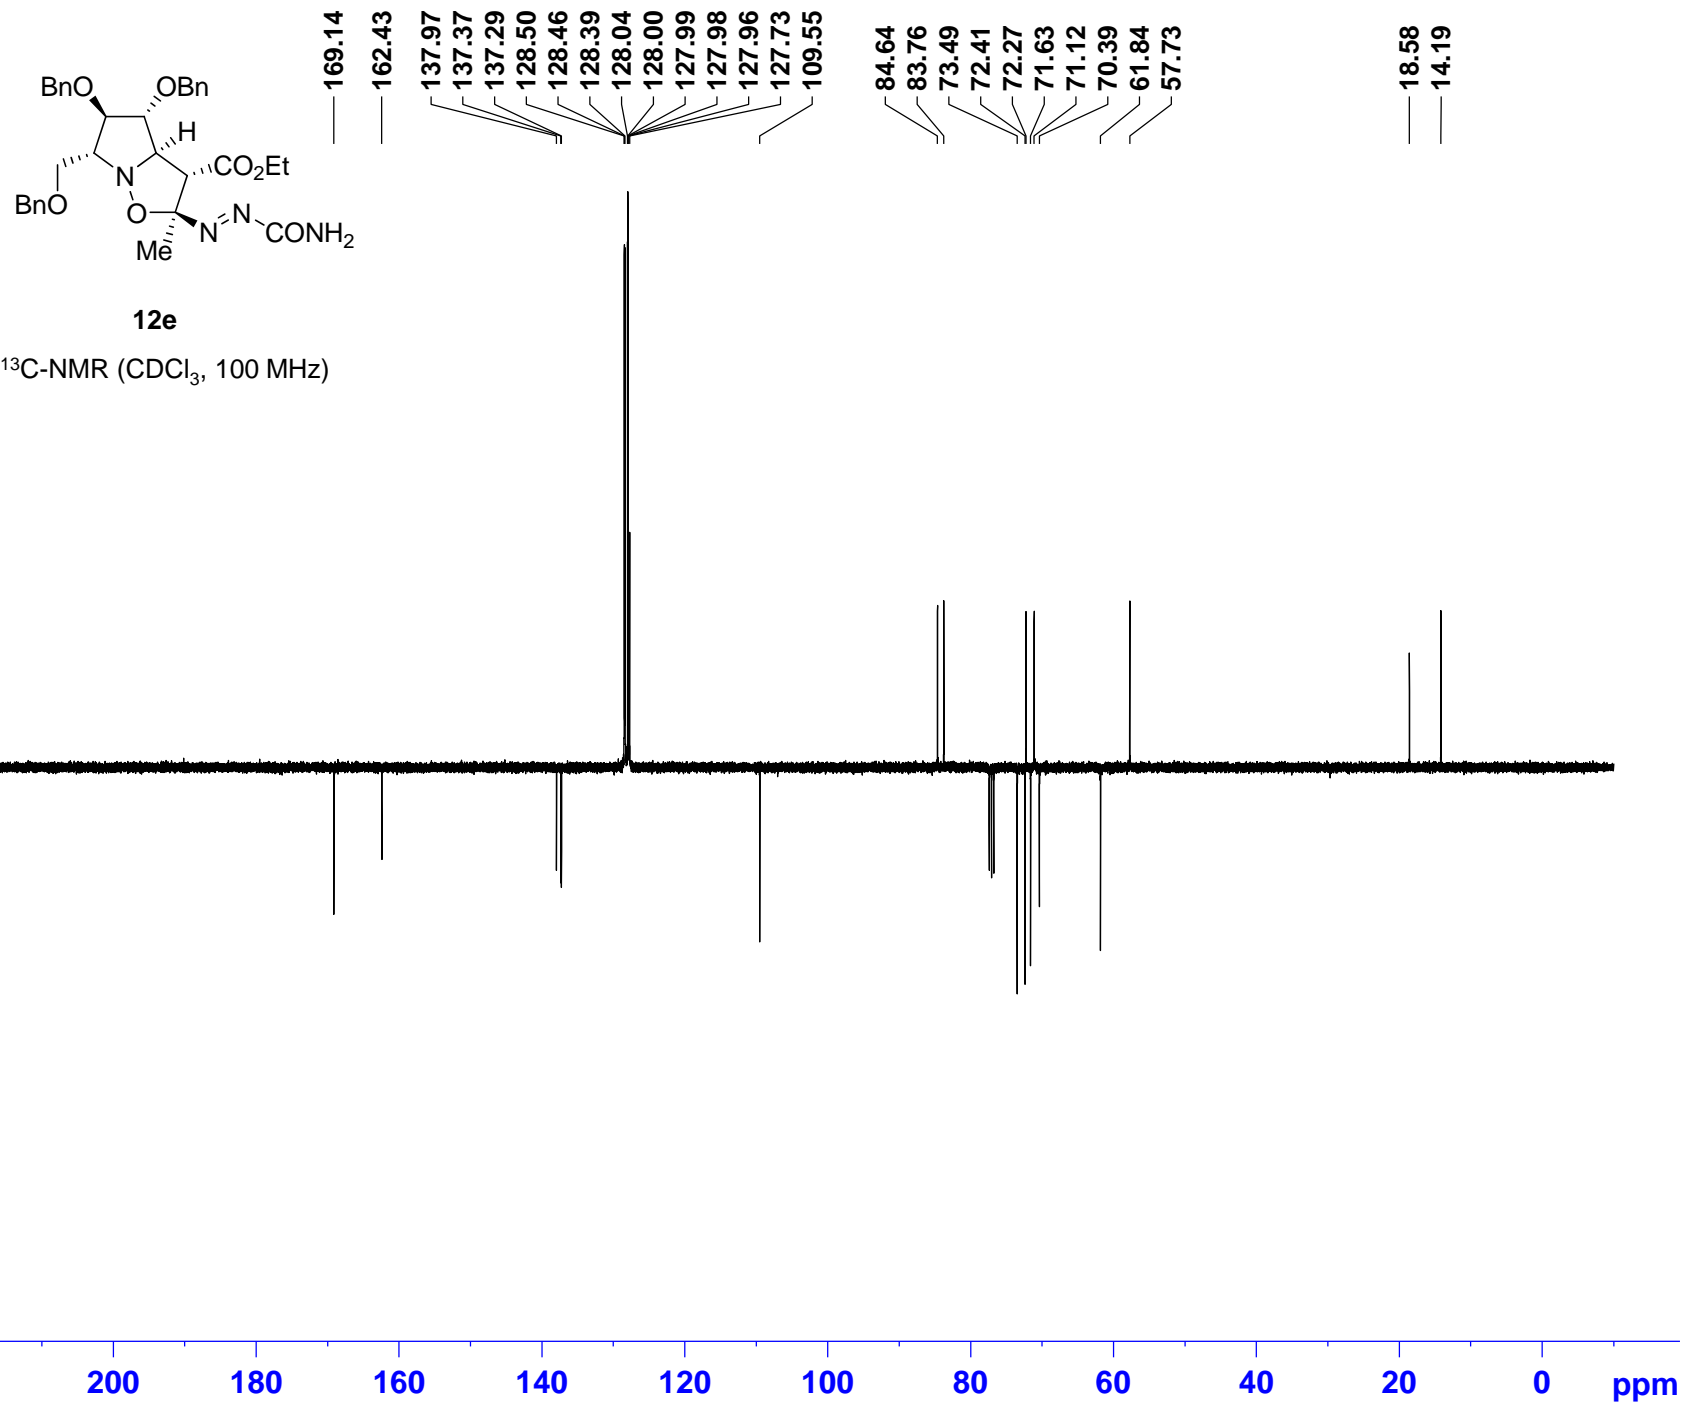

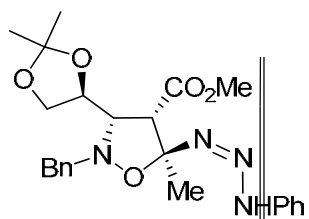

13a

<sup>1</sup>H-NMR (C<sub>6</sub>D<sub>6</sub>, 500 MHz)

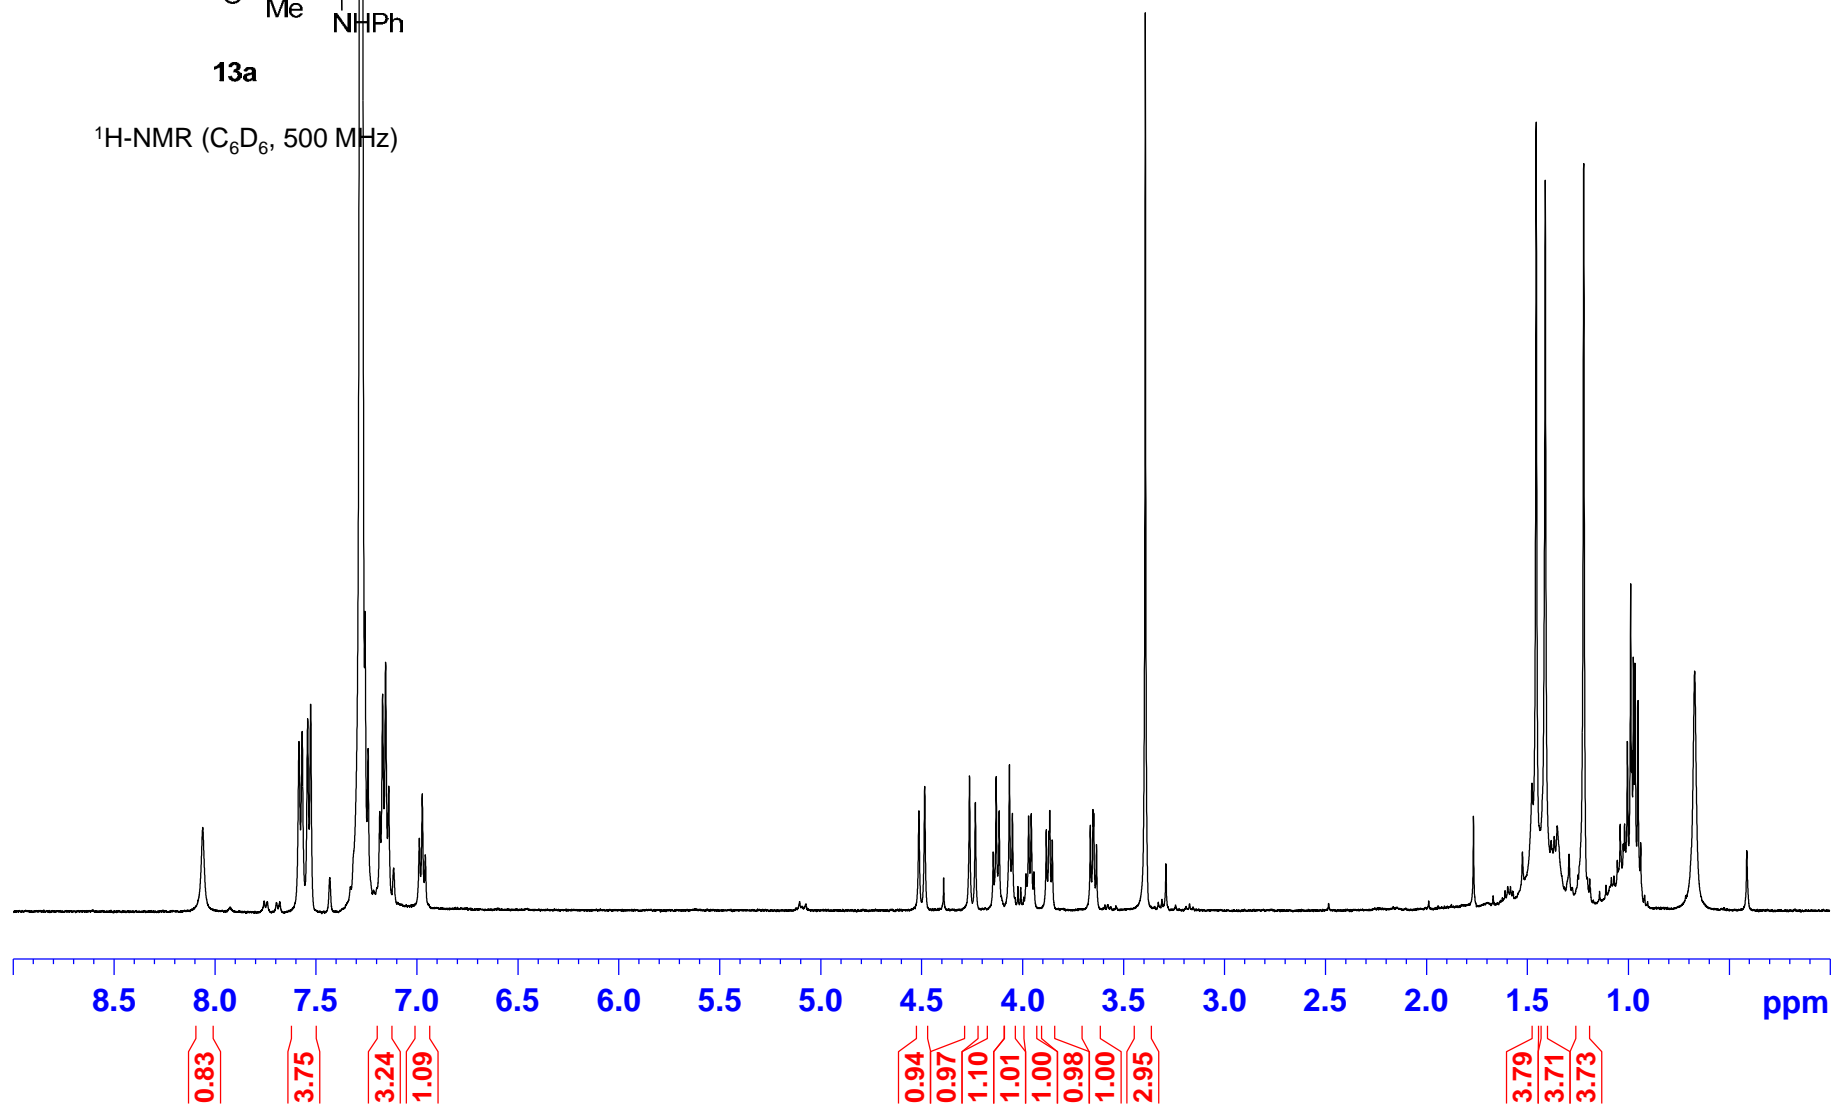



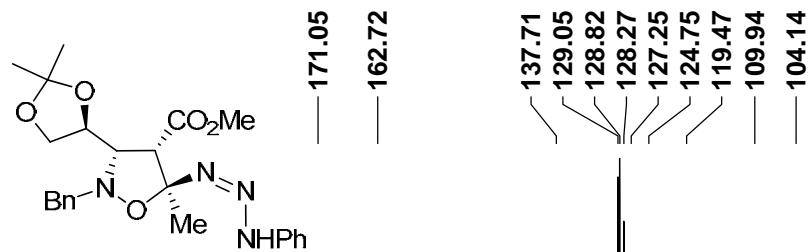

**13a**

$^{13}\text{C}$ -NMR ( $\text{C}_6\text{D}_6$ , 75 MHz)

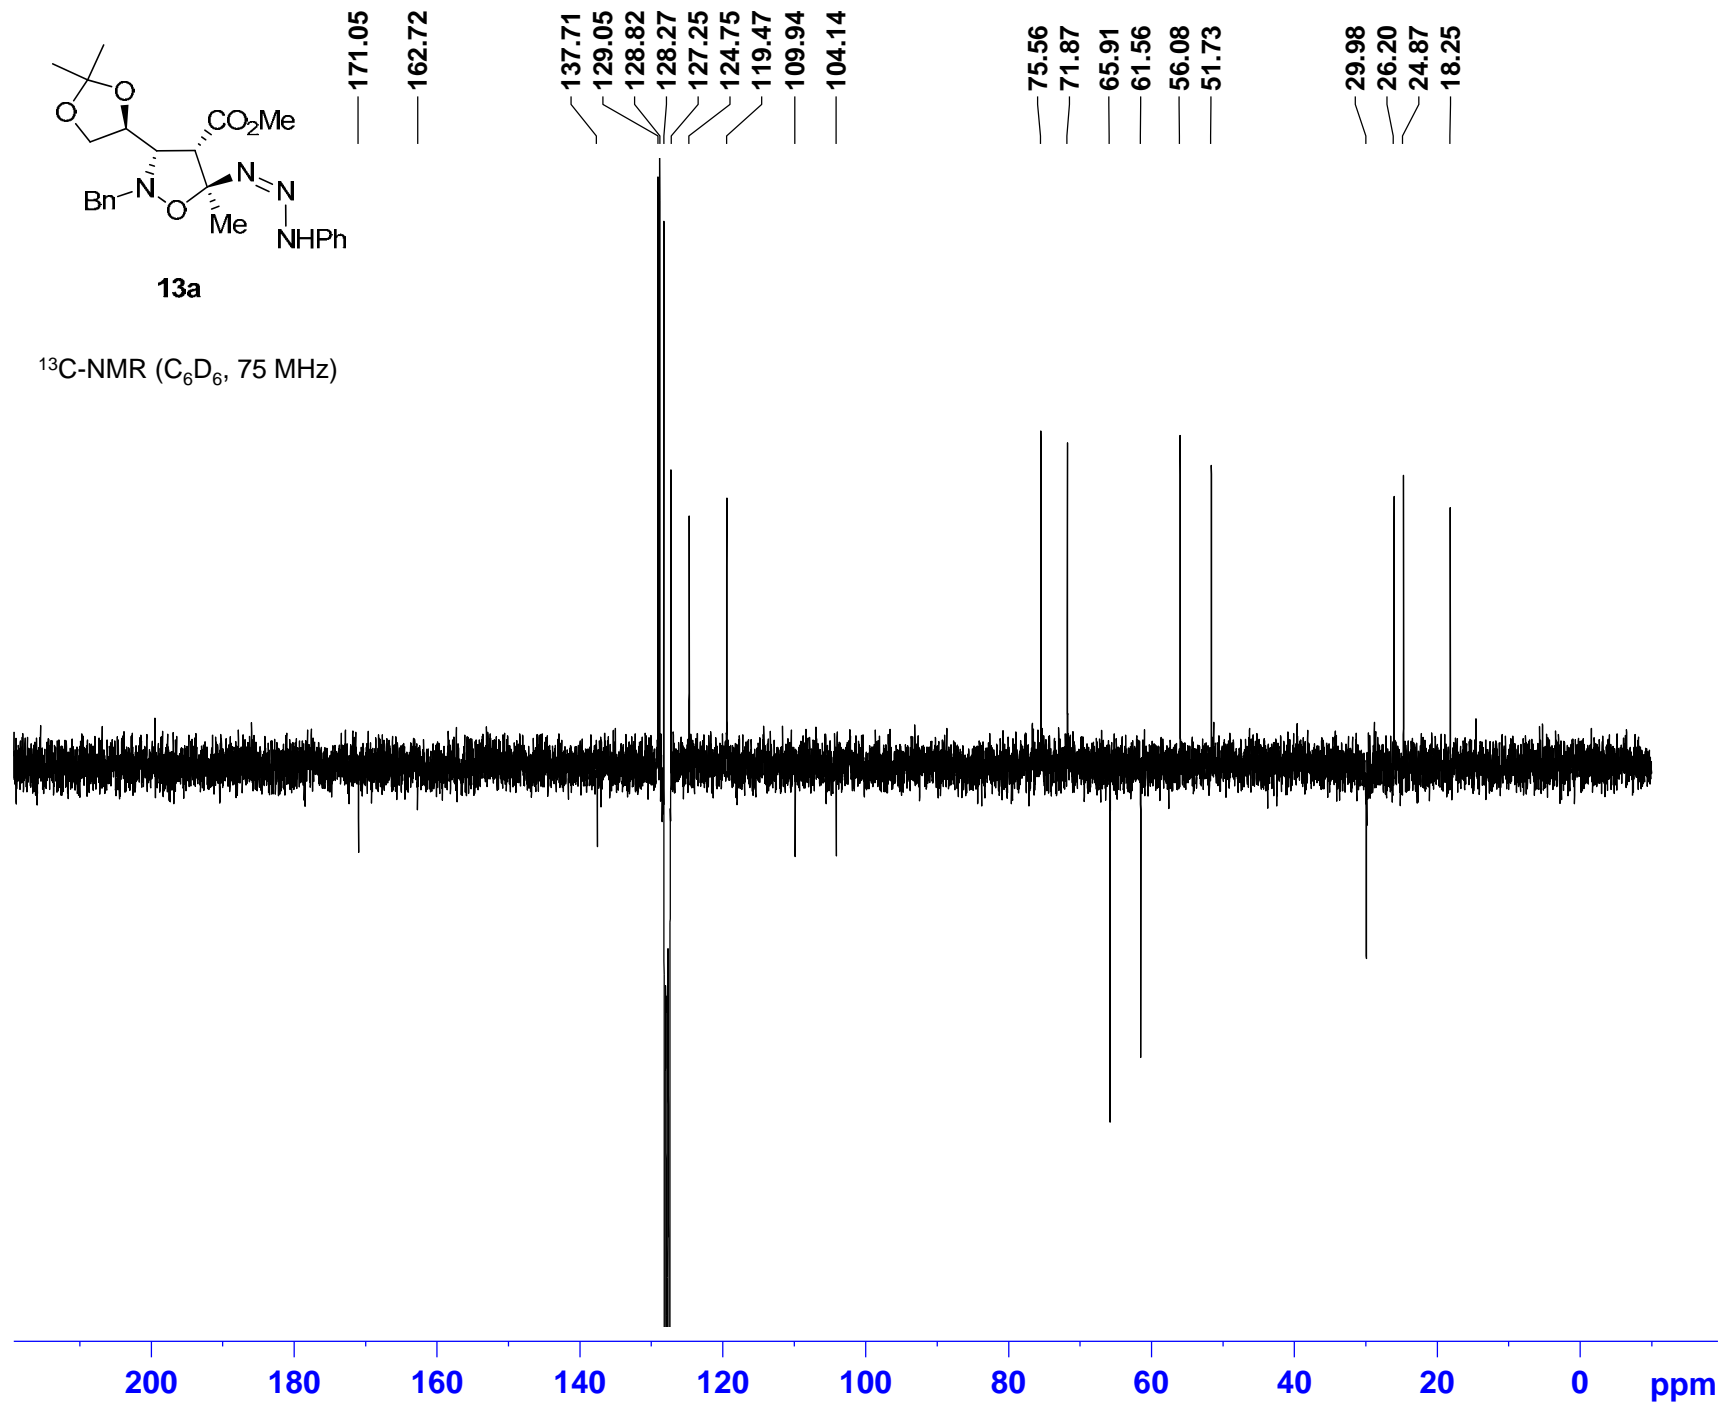

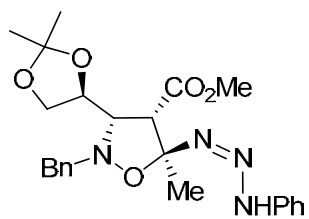

13a

NOESY (C<sub>6</sub>D<sub>6</sub>, 500 MHz)

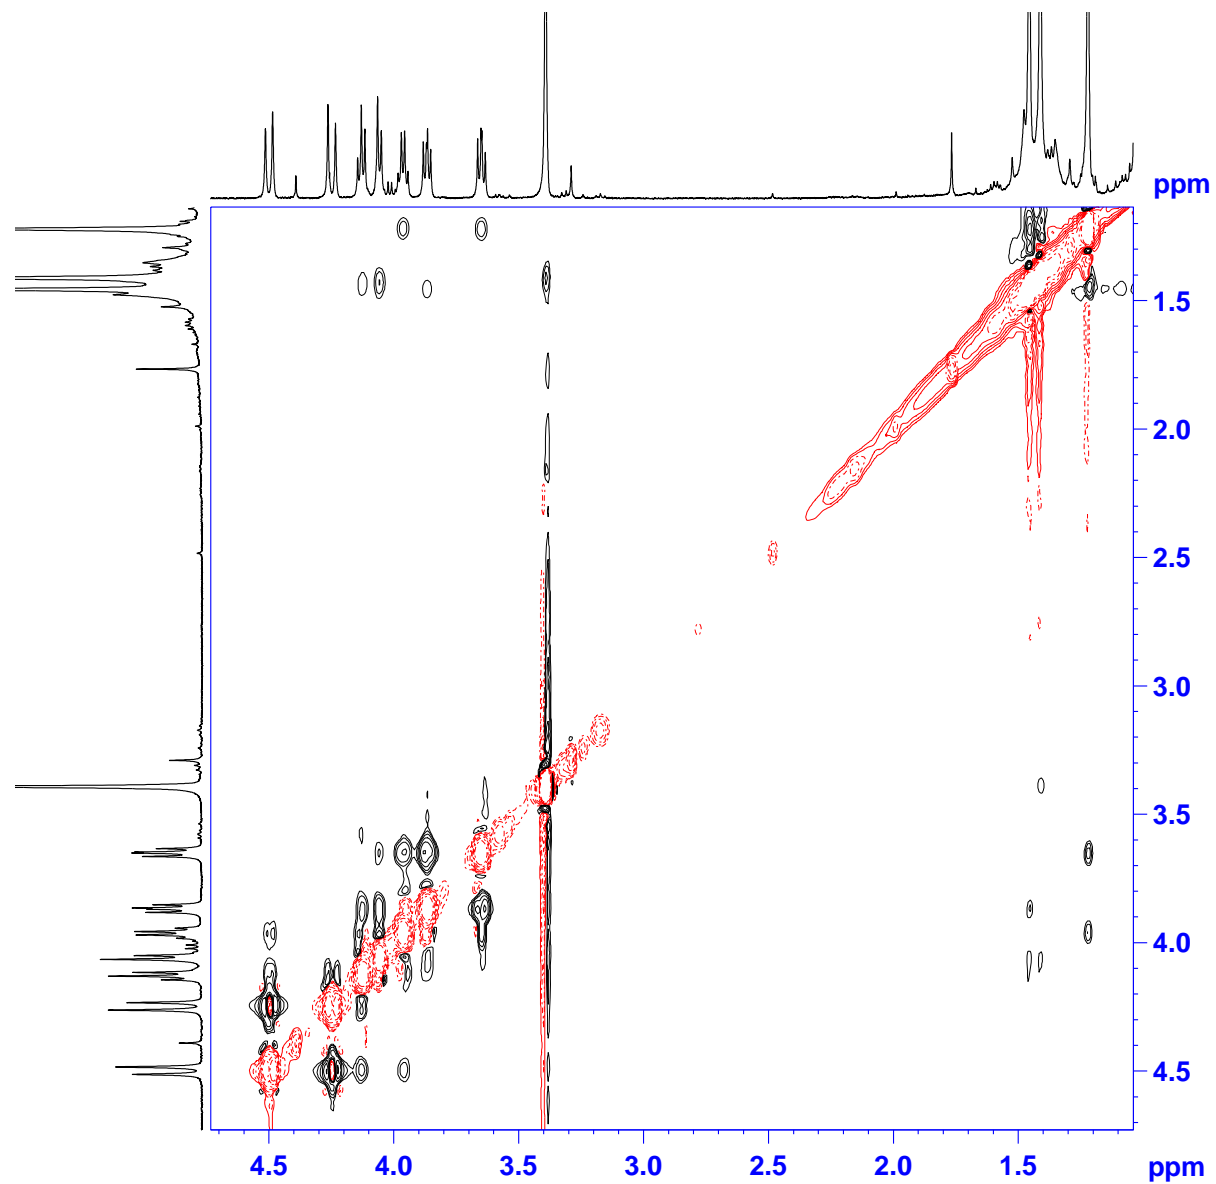

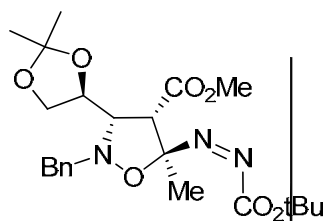

**13b isomer 1**

<sup>1</sup>H-NMR (C<sub>6</sub>D<sub>6</sub>, 500 MHz)

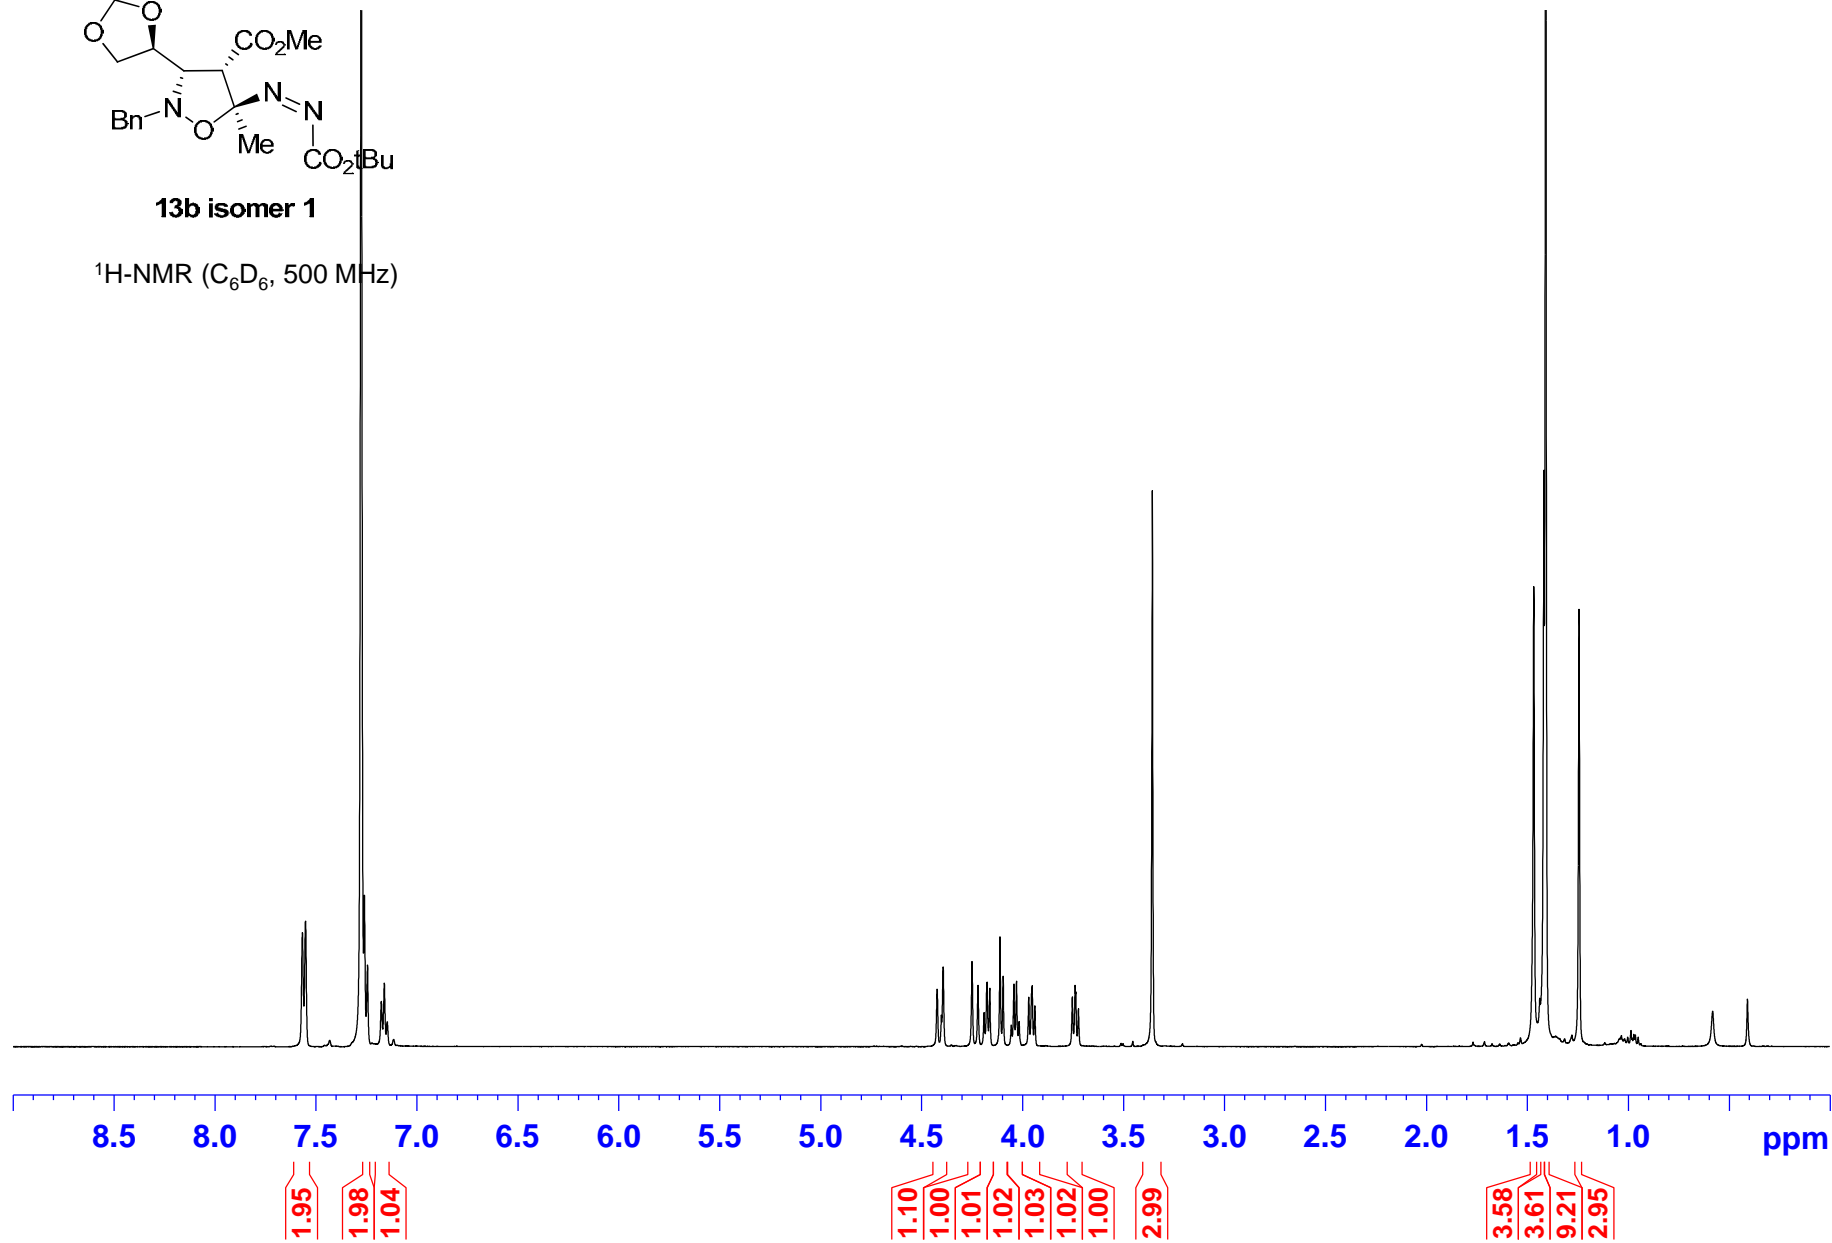

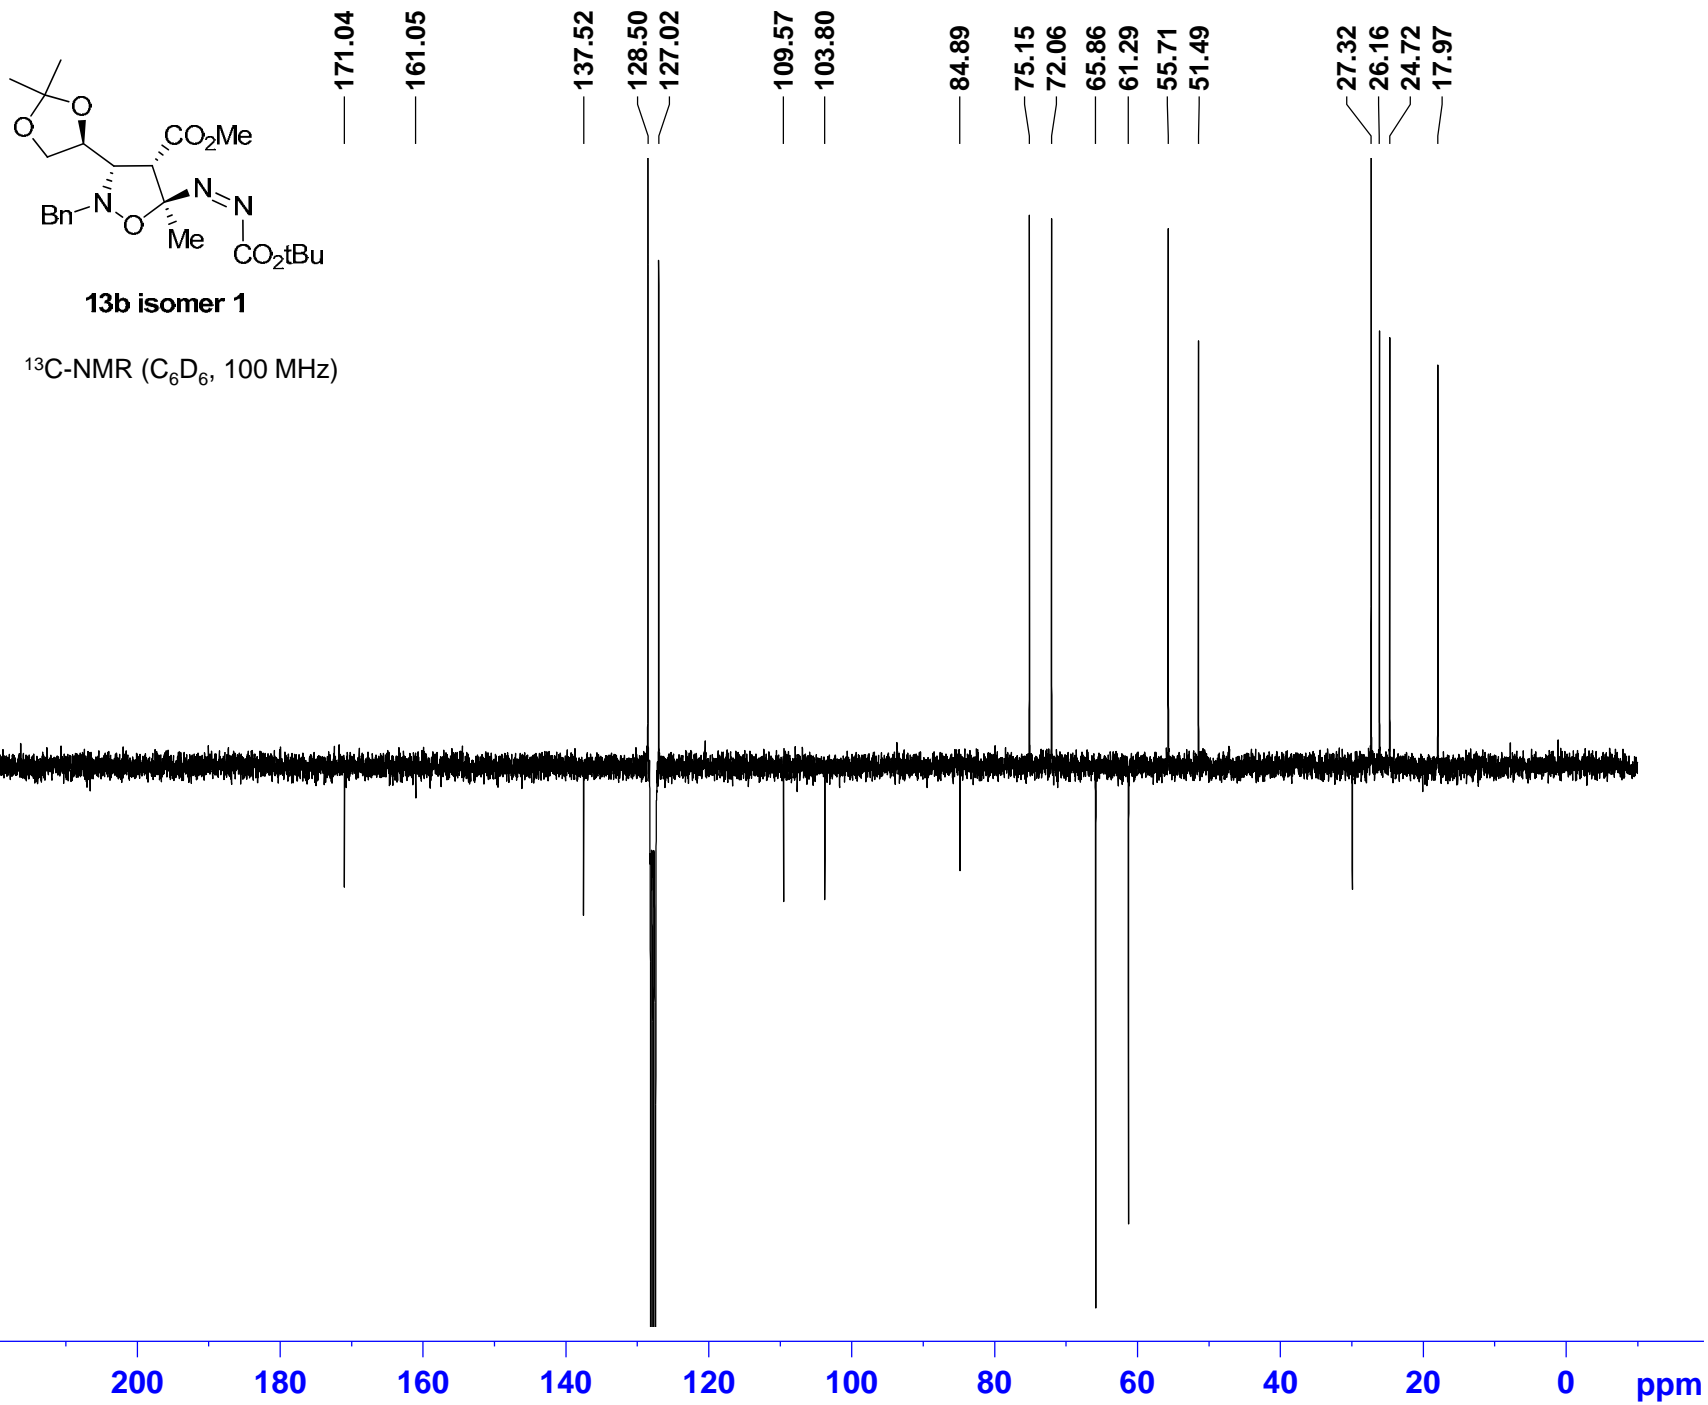

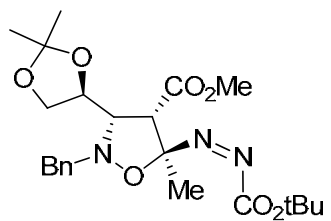

**13b isomer 1**

NOESY (C<sub>6</sub>D<sub>6</sub>, 500 MHz)

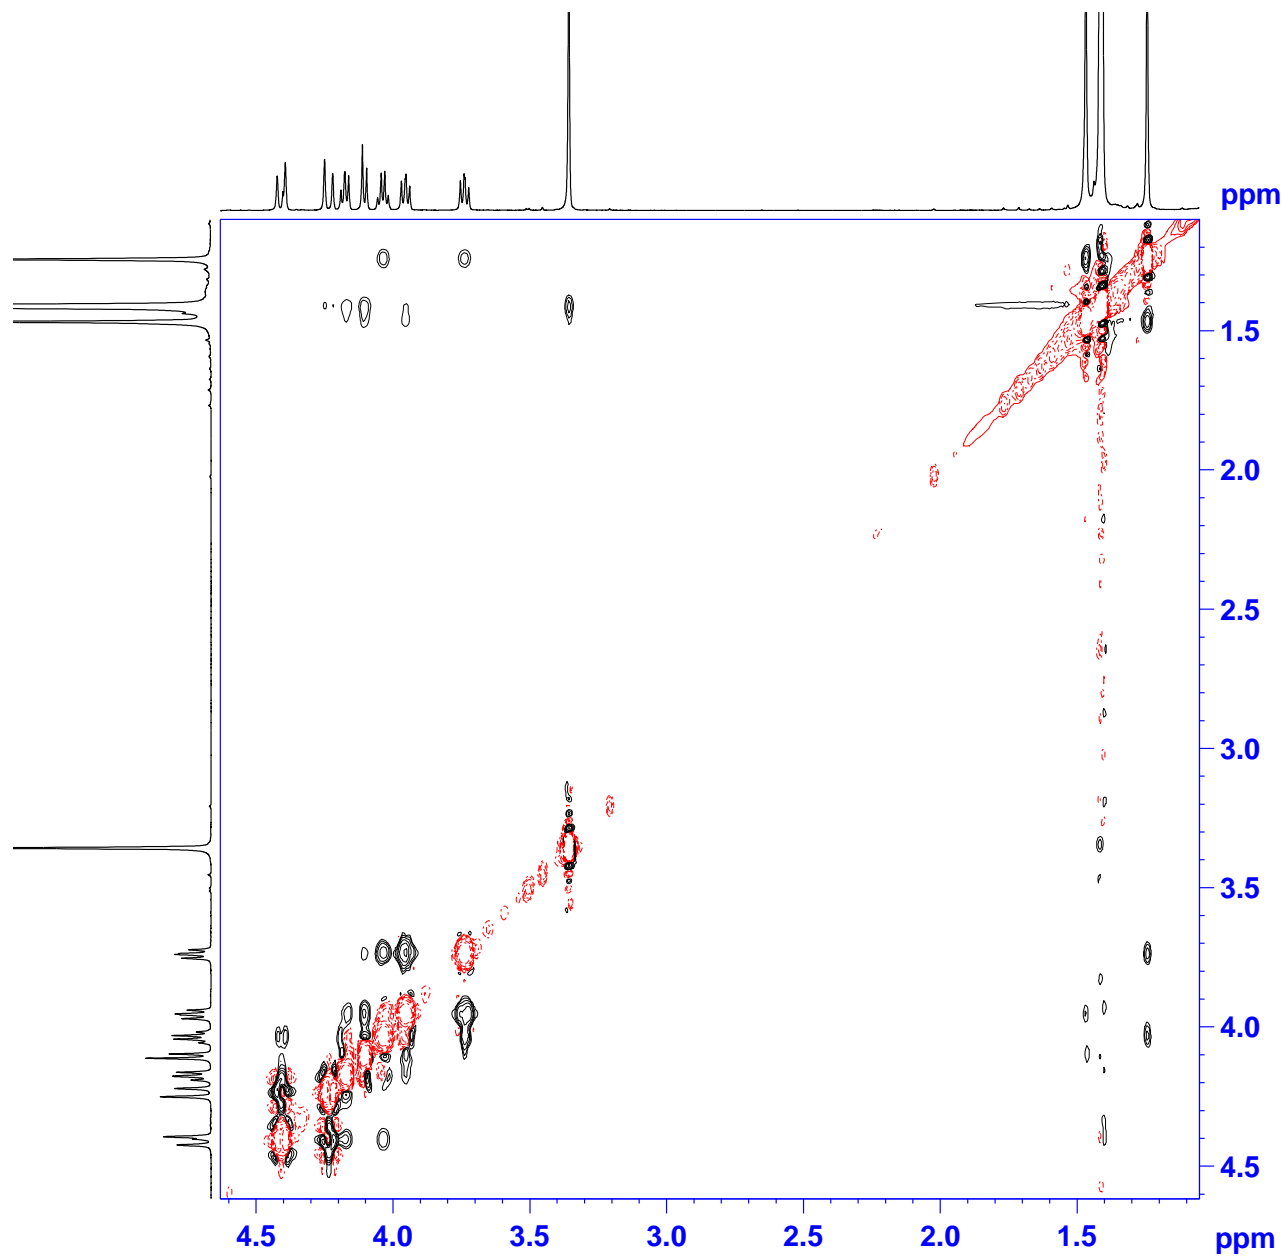

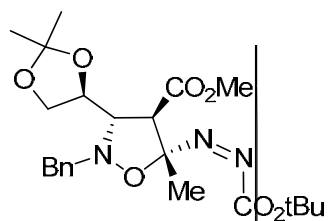

**13b isomer 2**

$^1\text{H-NMR}$  ( $\text{C}_6\text{D}_6$ , 500 MHz)

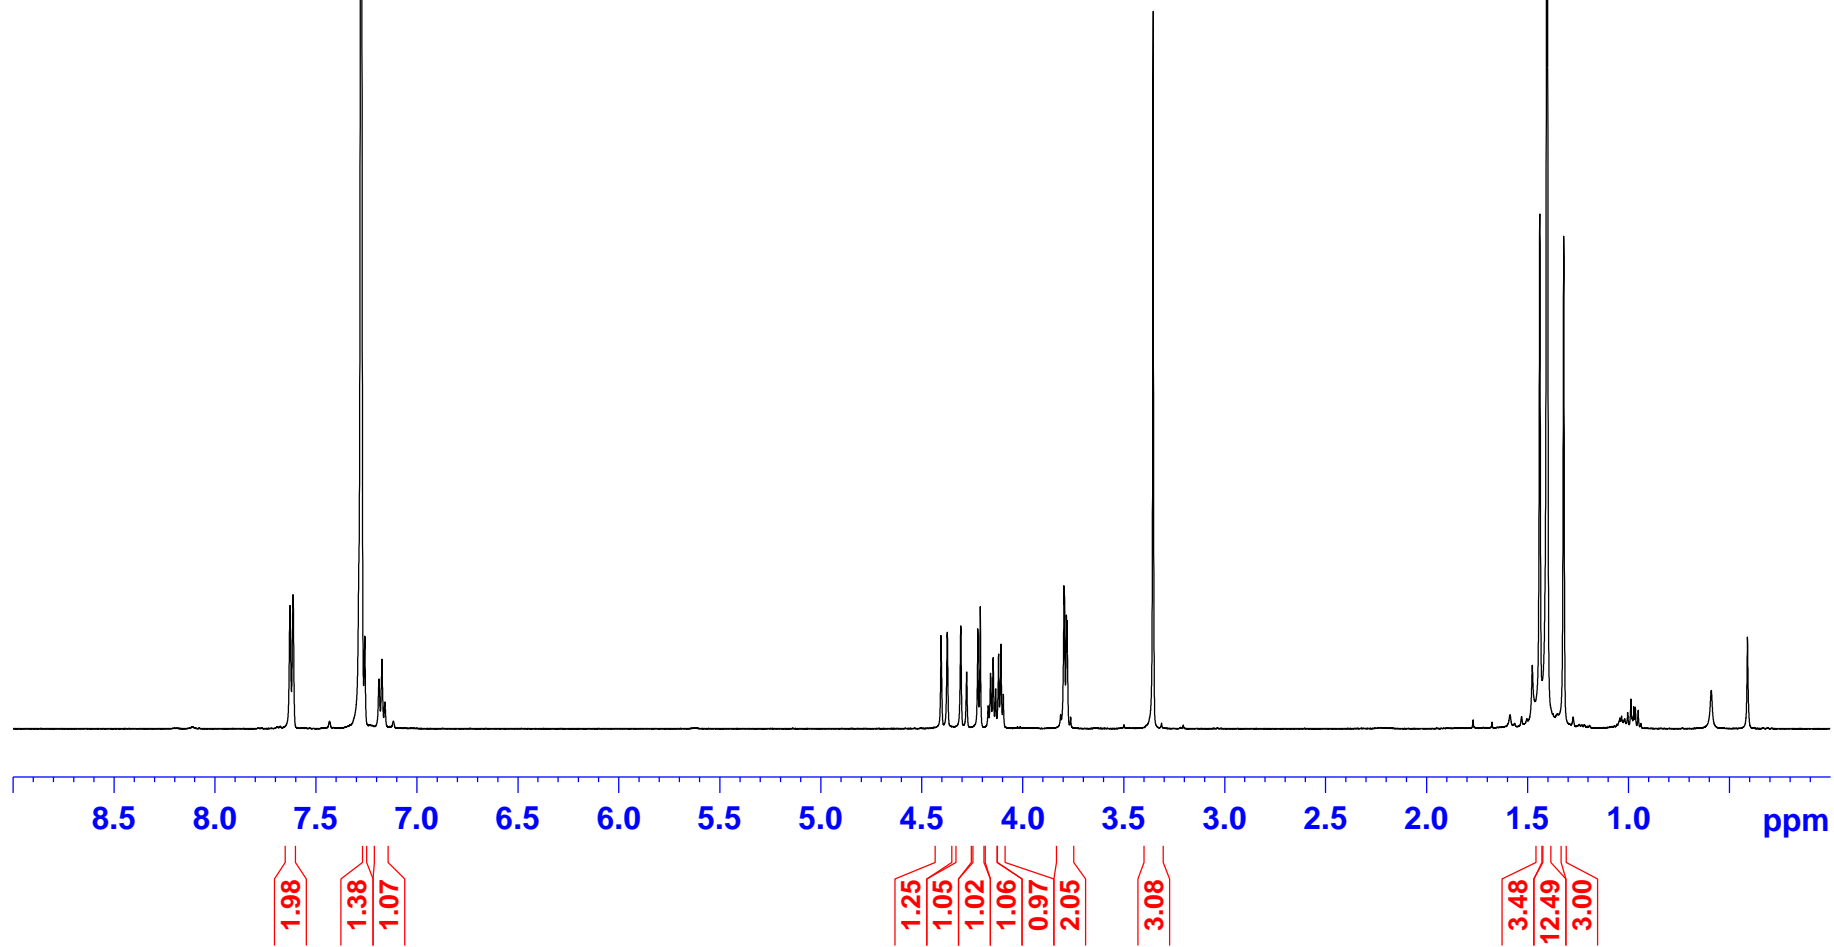

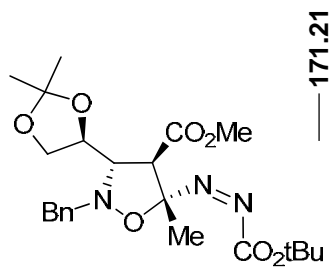

13b isomer 2

<sup>13</sup>C-NMR (C<sub>6</sub>D<sub>6</sub>, 100 MHz)

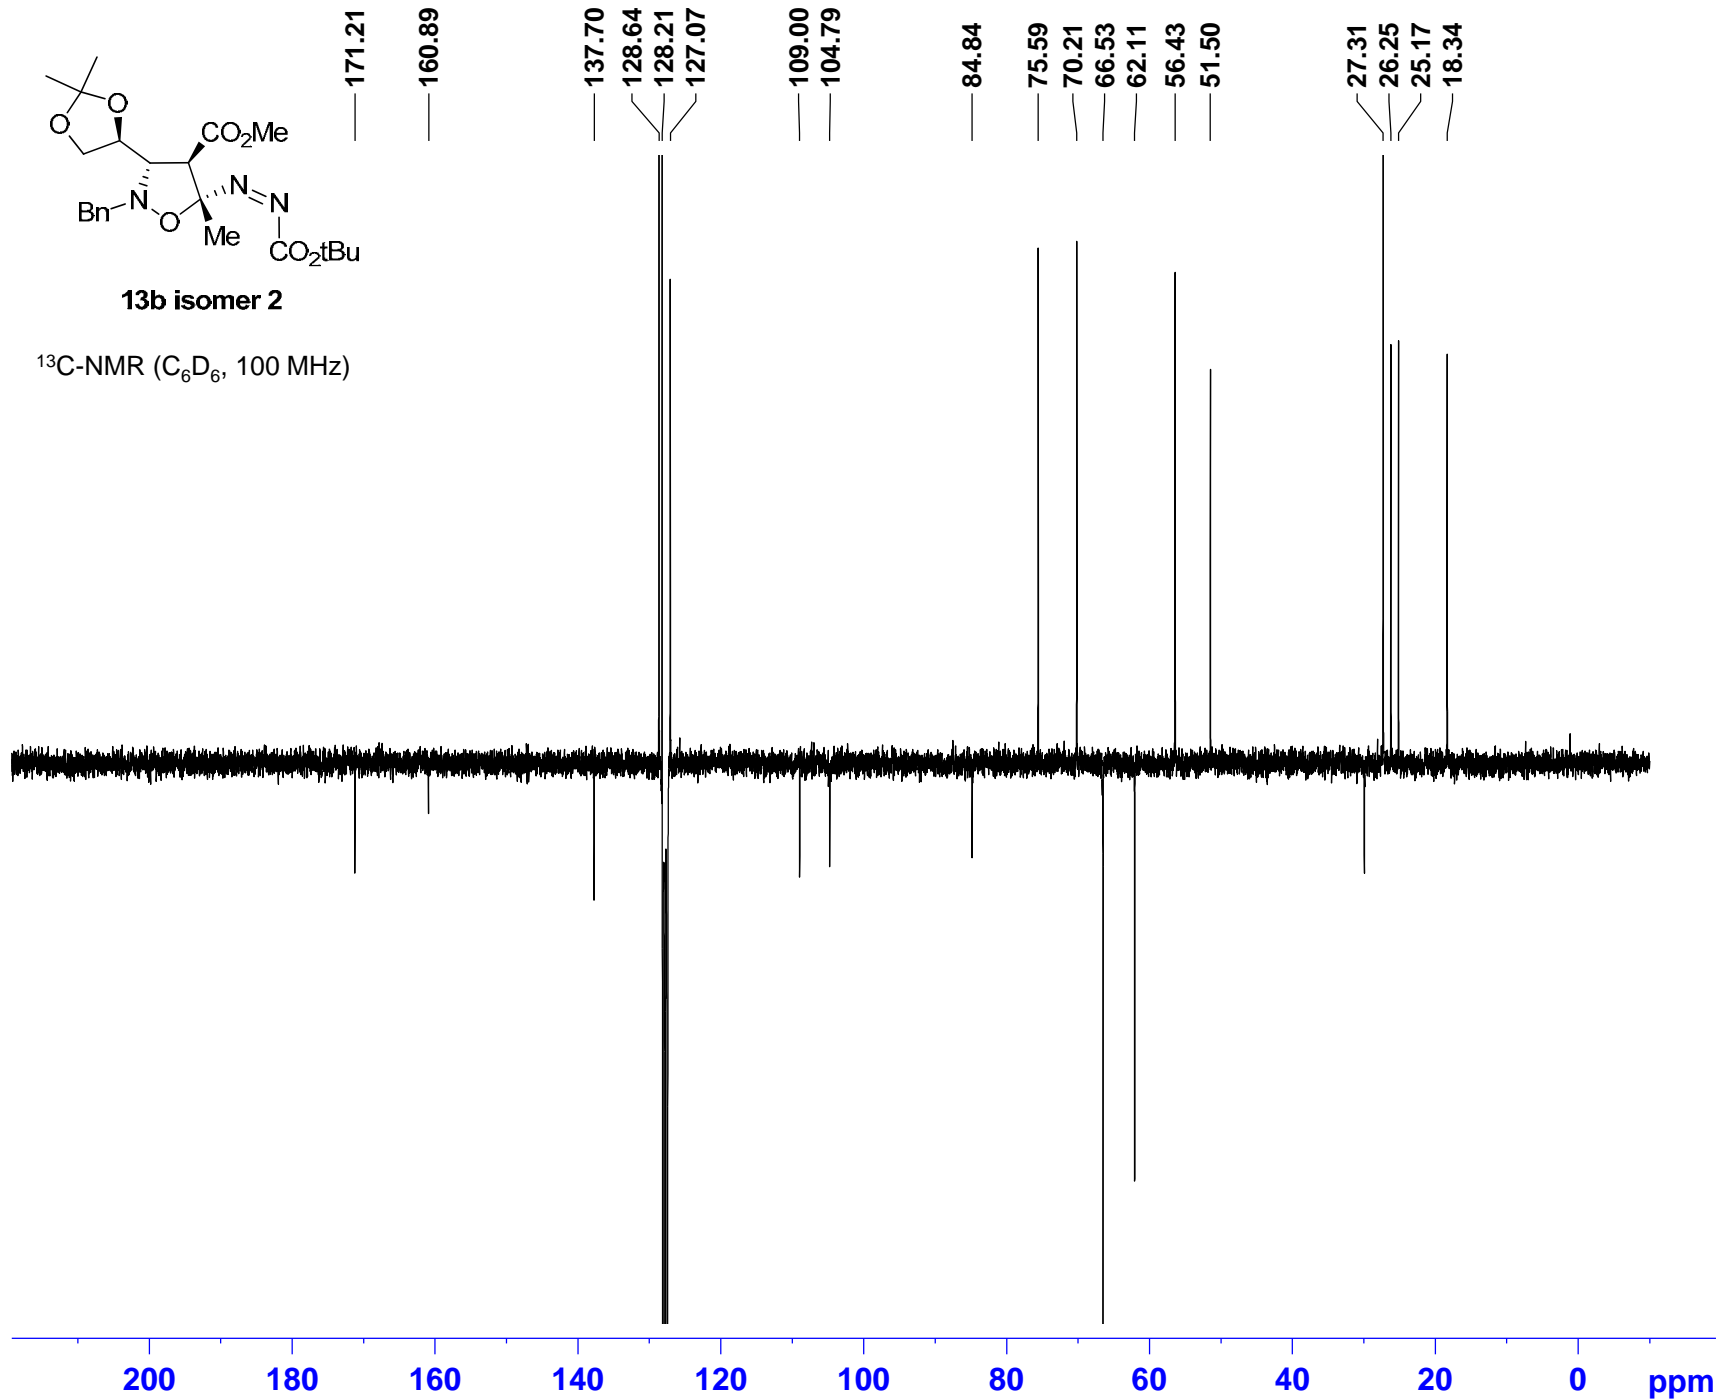

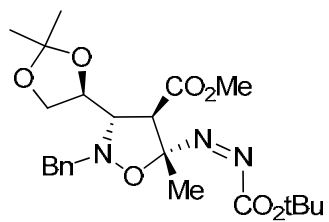

**13b isomer 2**

NOESY (C<sub>6</sub>D<sub>6</sub>, 500 MHz)

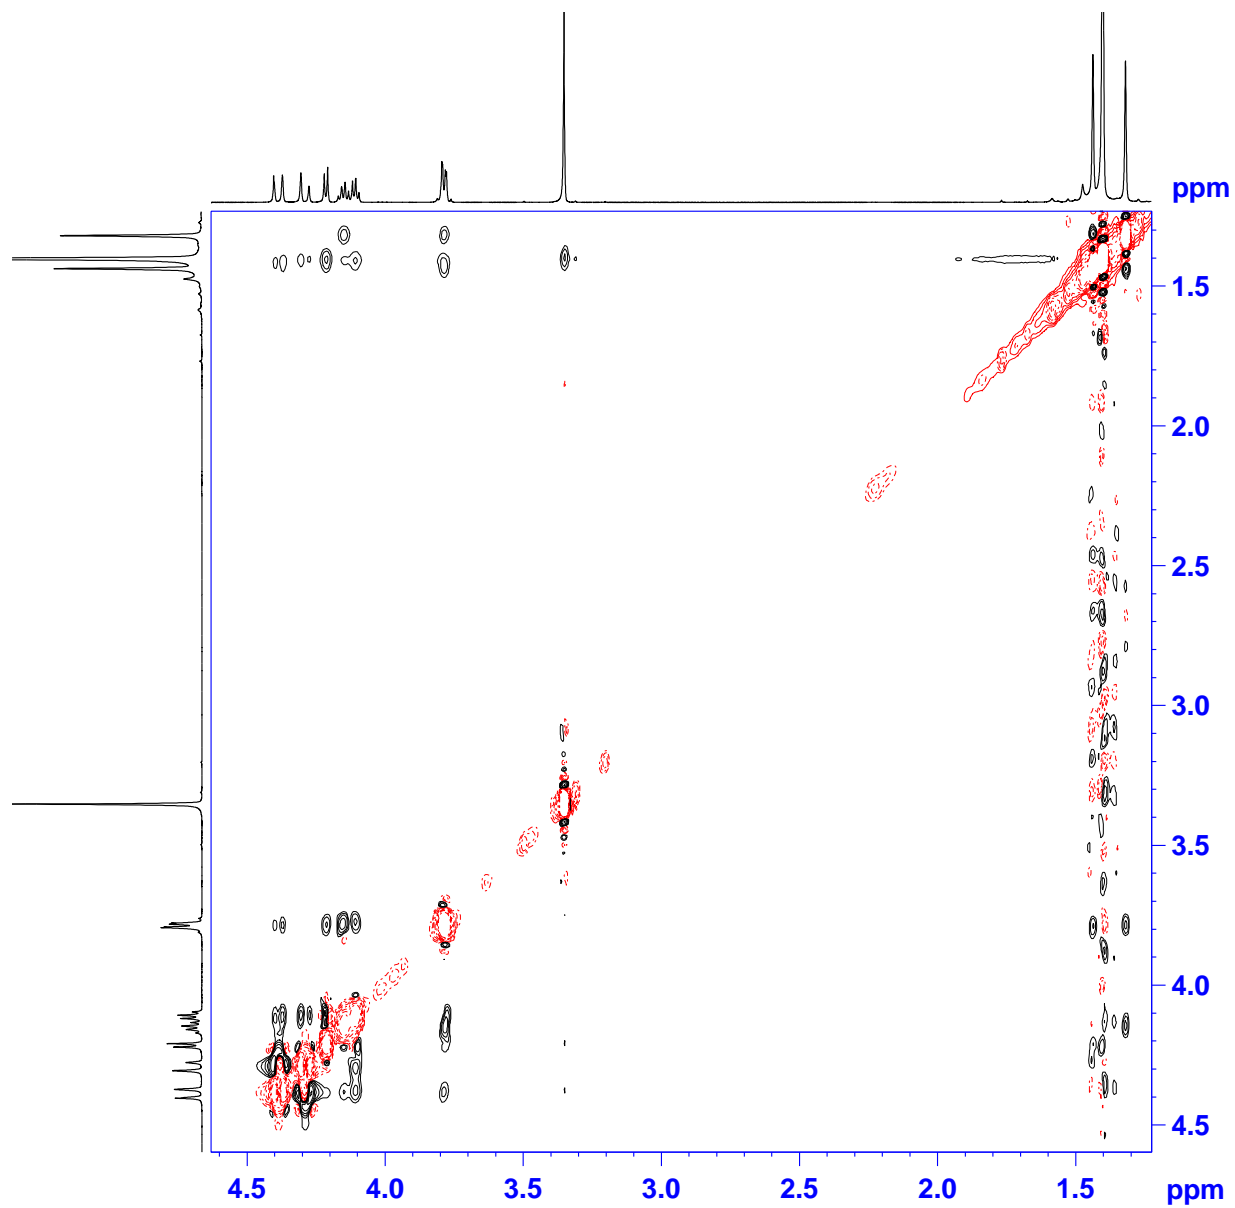



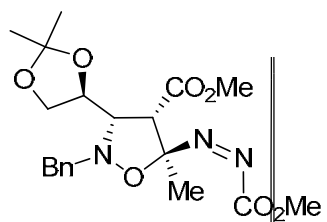

**13d isomer 1**

<sup>1</sup>H-NMR (C<sub>6</sub>D<sub>6</sub>, 400 MHz)

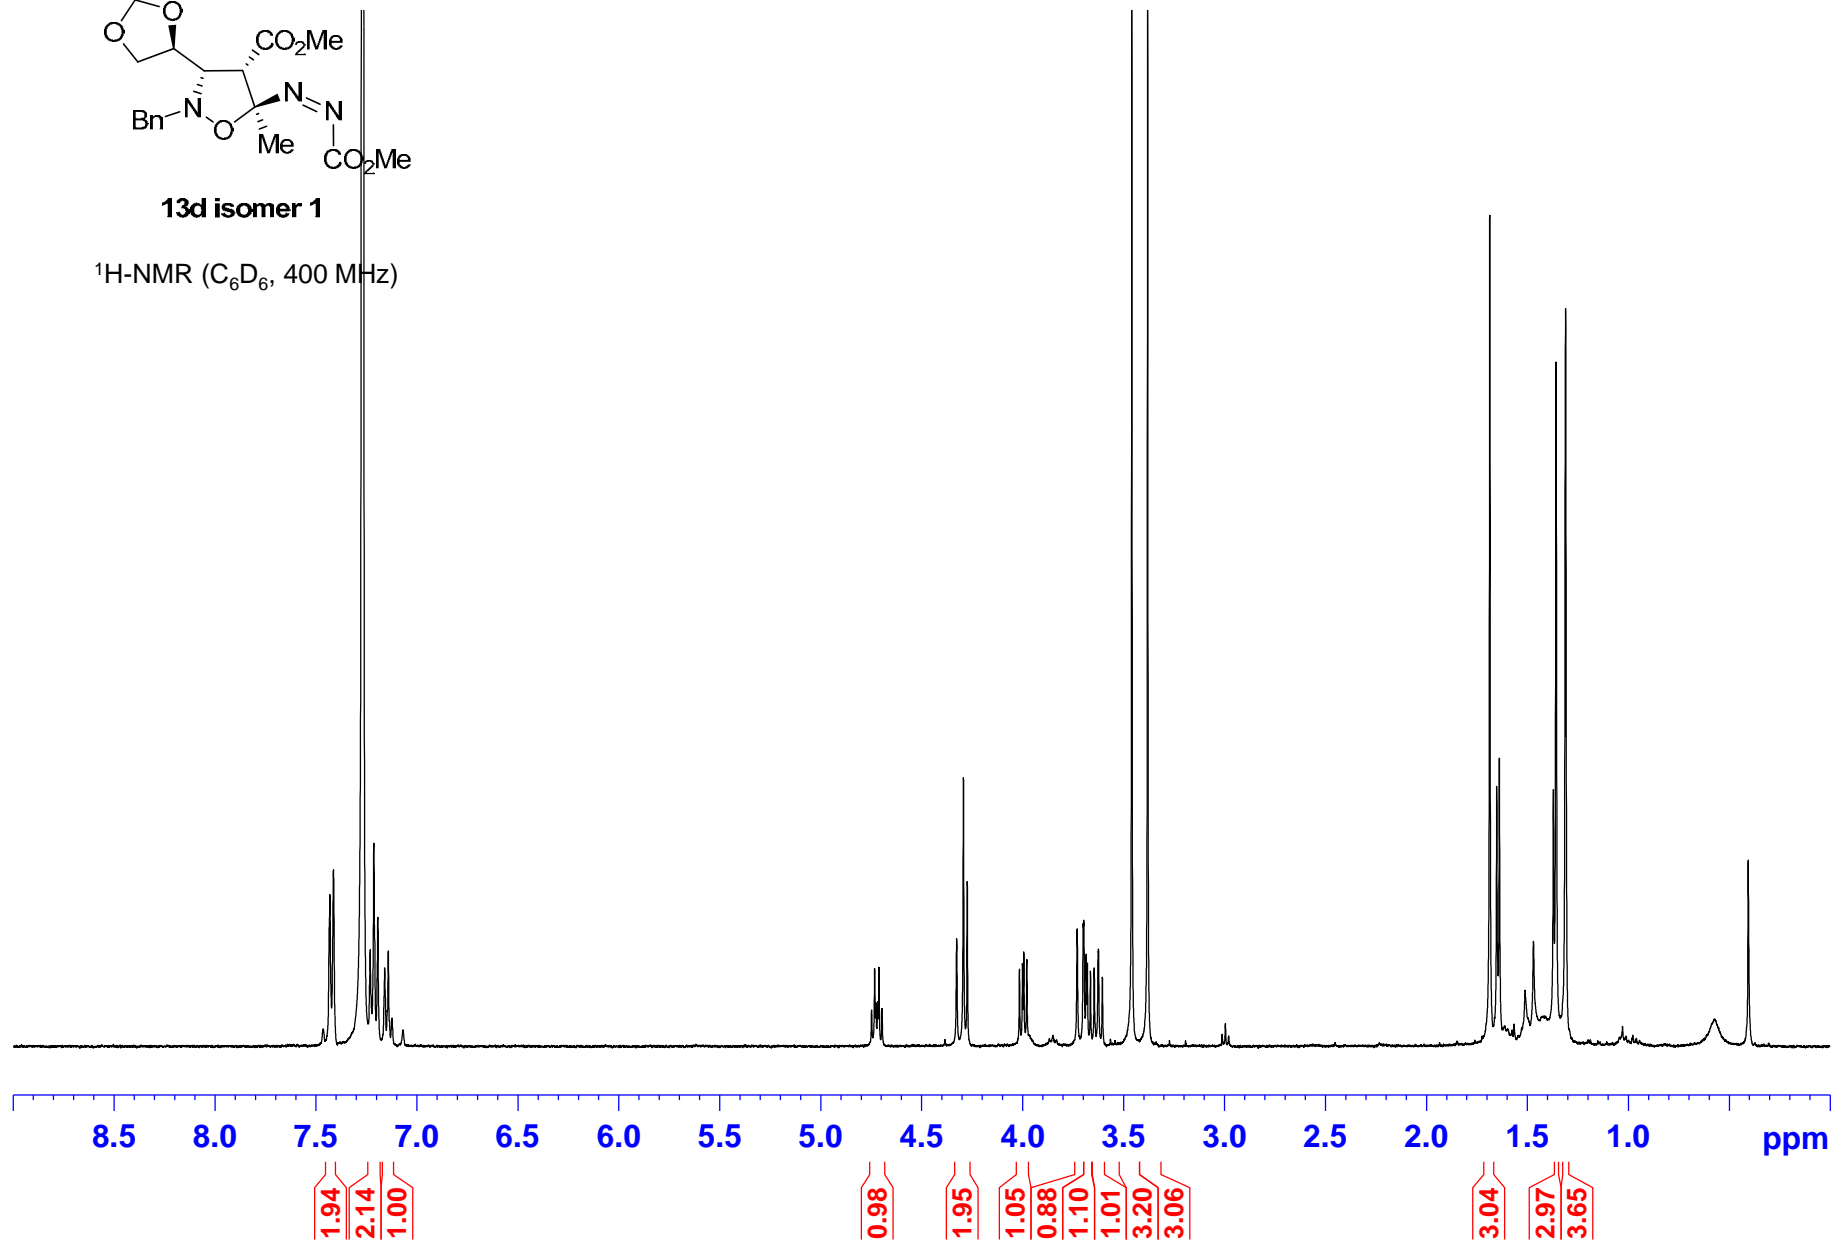

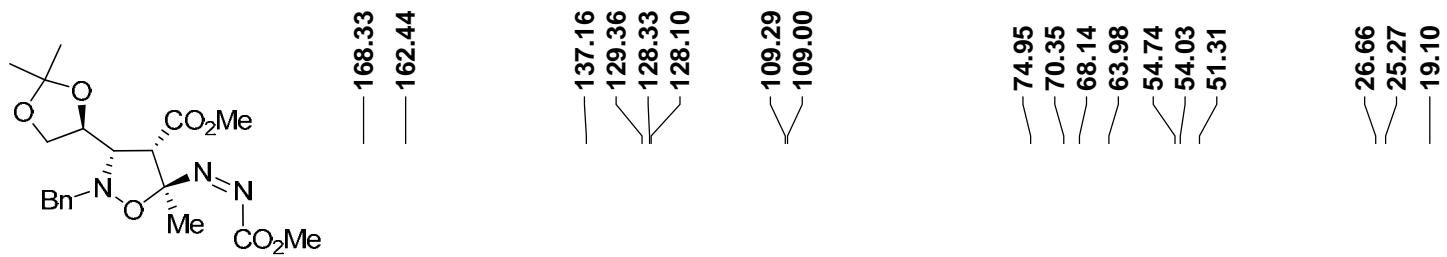

**13d isomer 1**

$^{13}\text{C-NMR}$  ( $\text{C}_6\text{D}_6$ , 100 MHz)

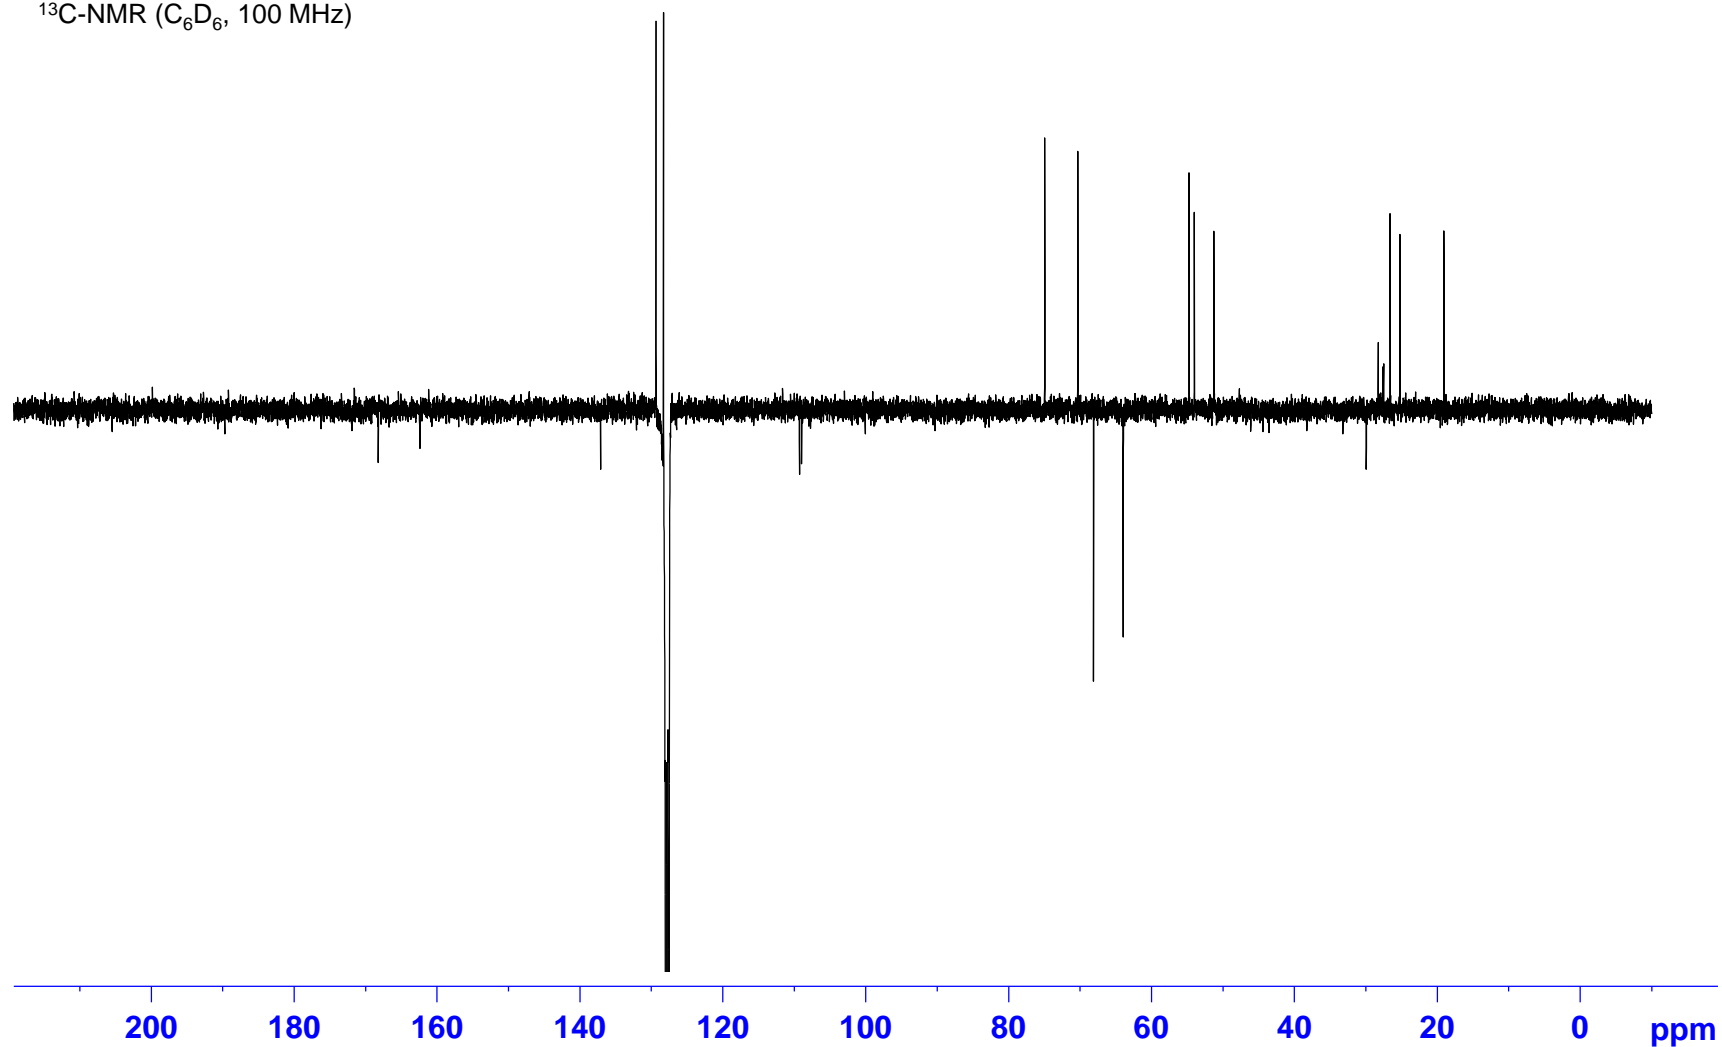

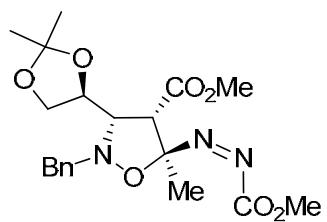

13d isomer 1

NOESY (C<sub>6</sub>D<sub>6</sub>, 400 MHz)

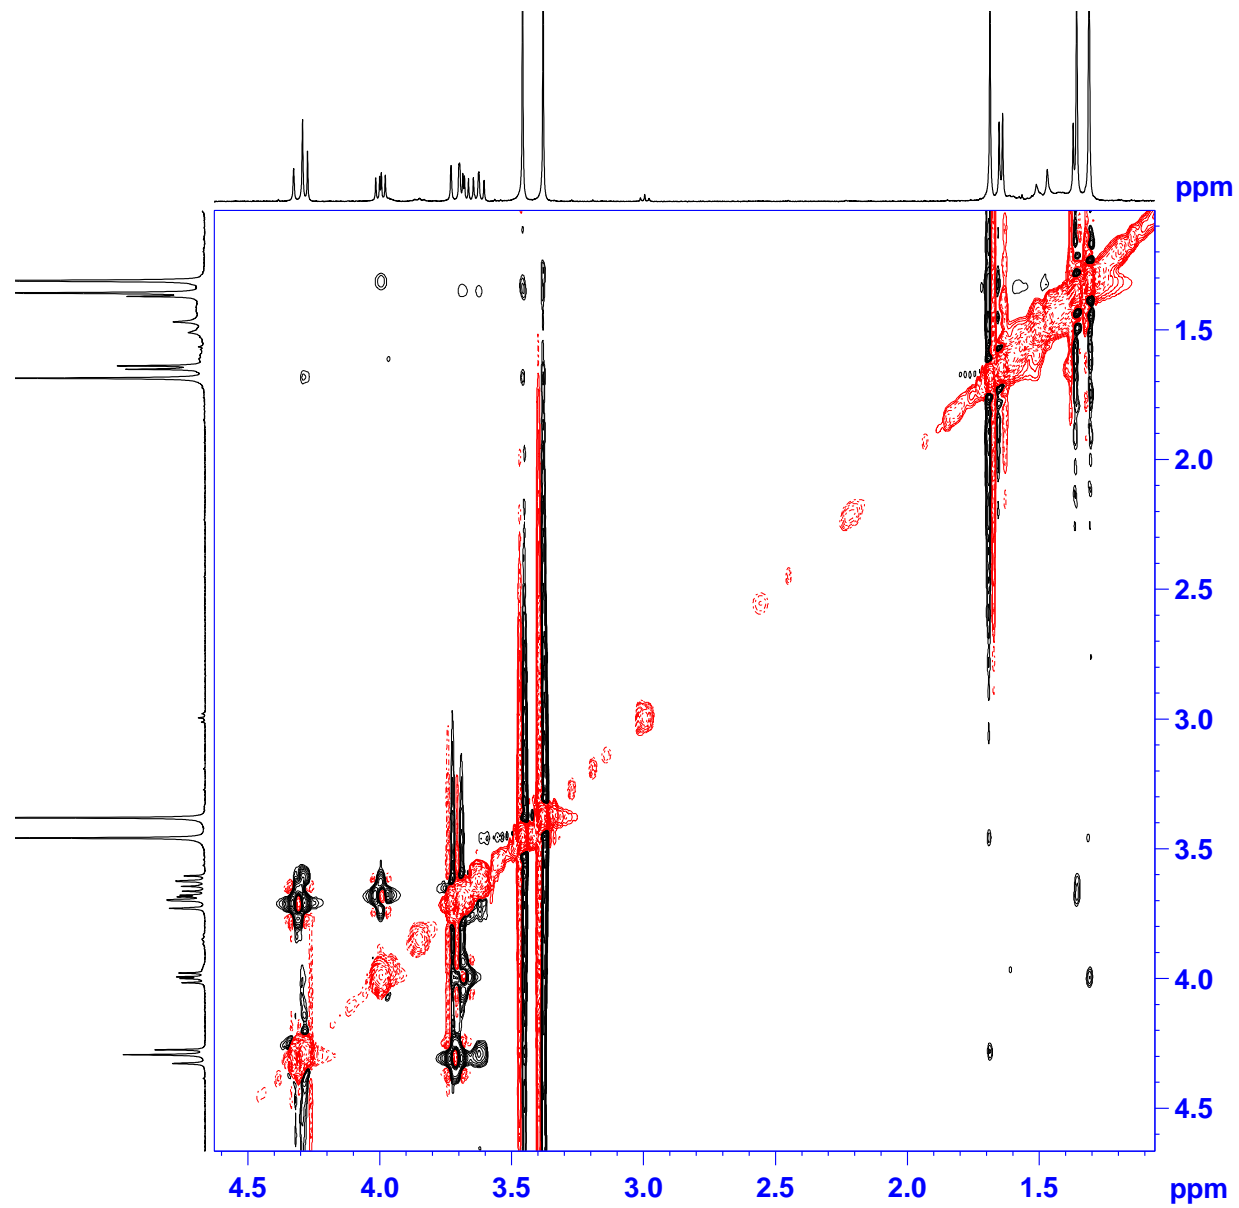

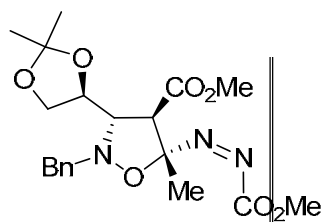

13d isomer 2

<sup>1</sup>H-NMR (C<sub>6</sub>D<sub>6</sub>, 500 MHz)

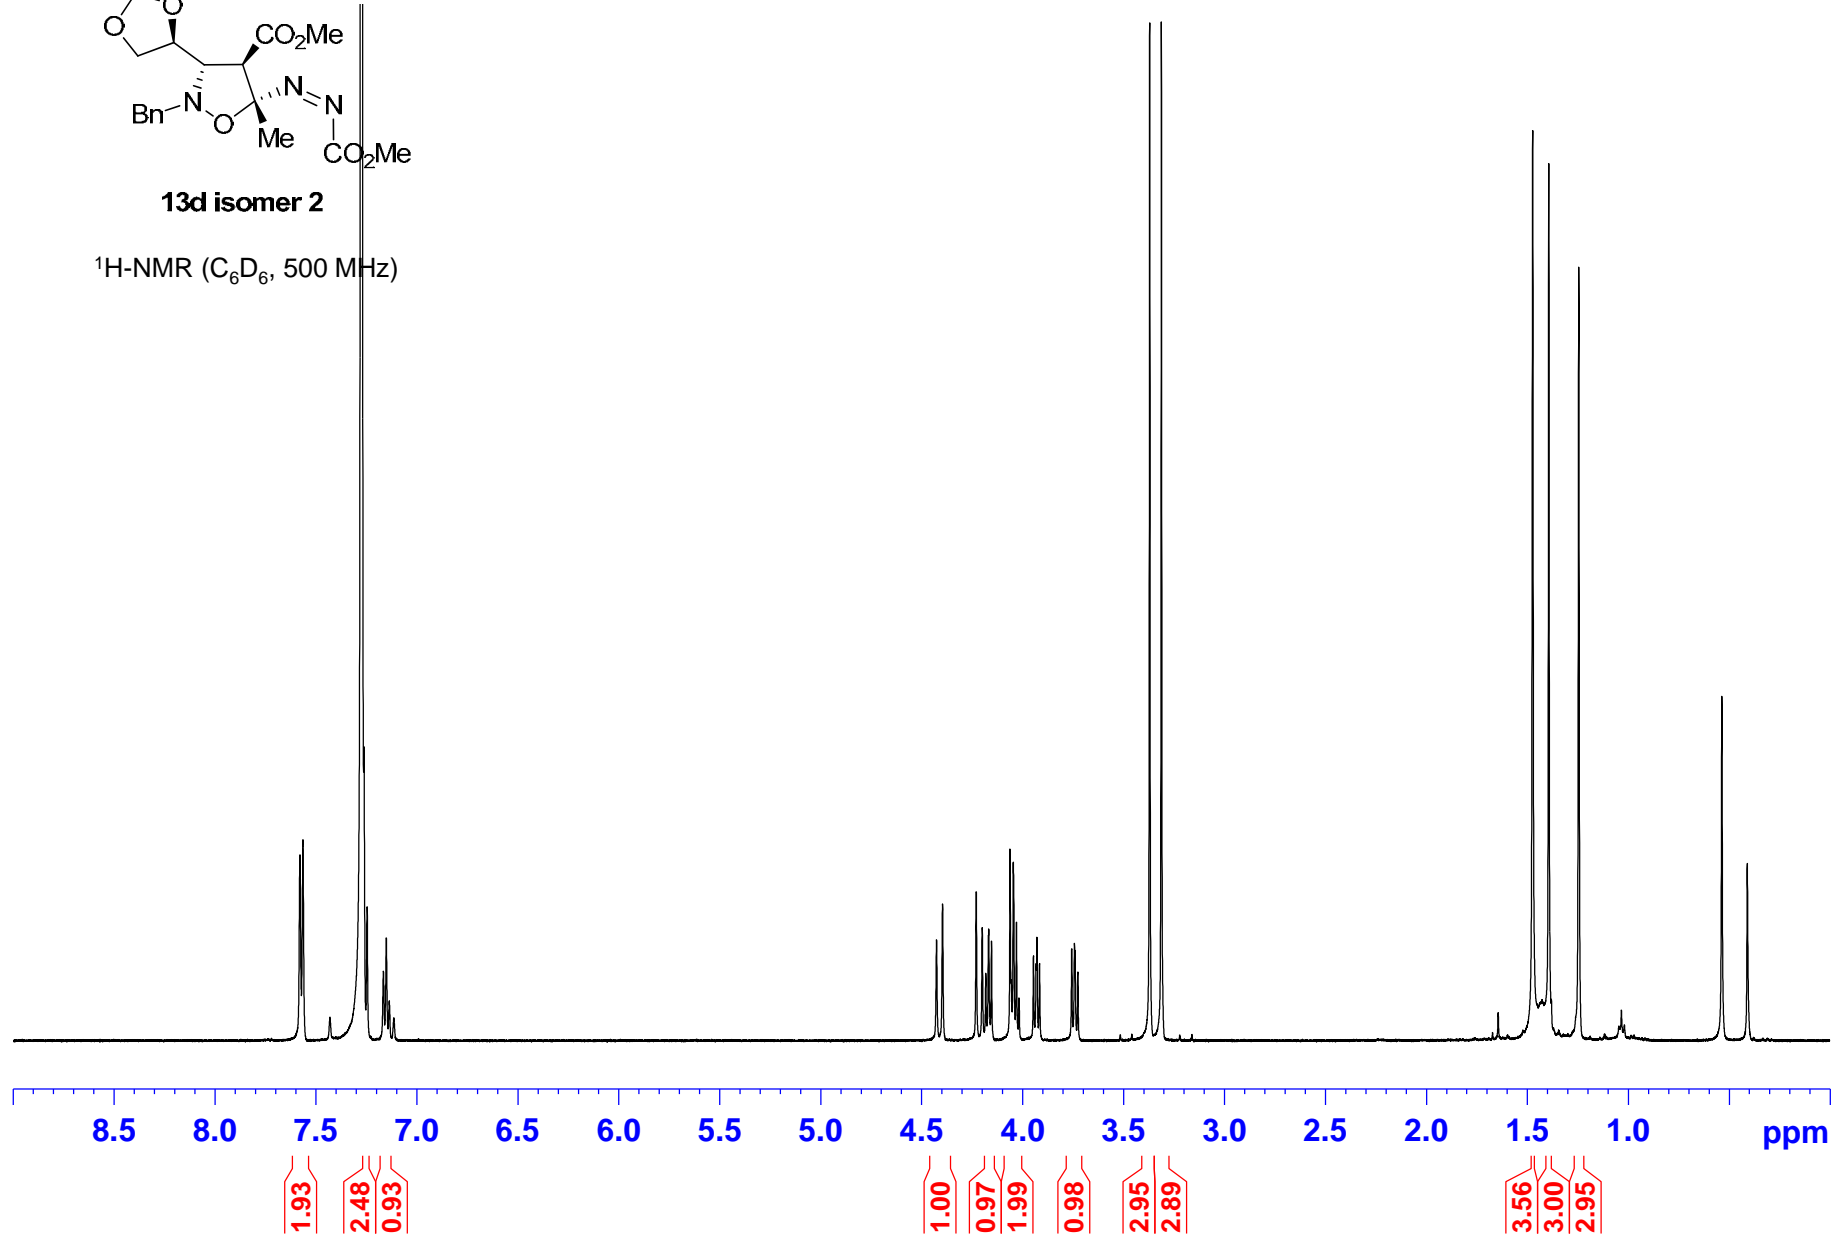



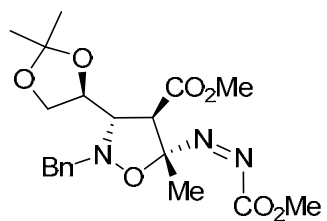

13d isomer 2

NOESY (C<sub>6</sub>D<sub>6</sub>, 500 MHz)

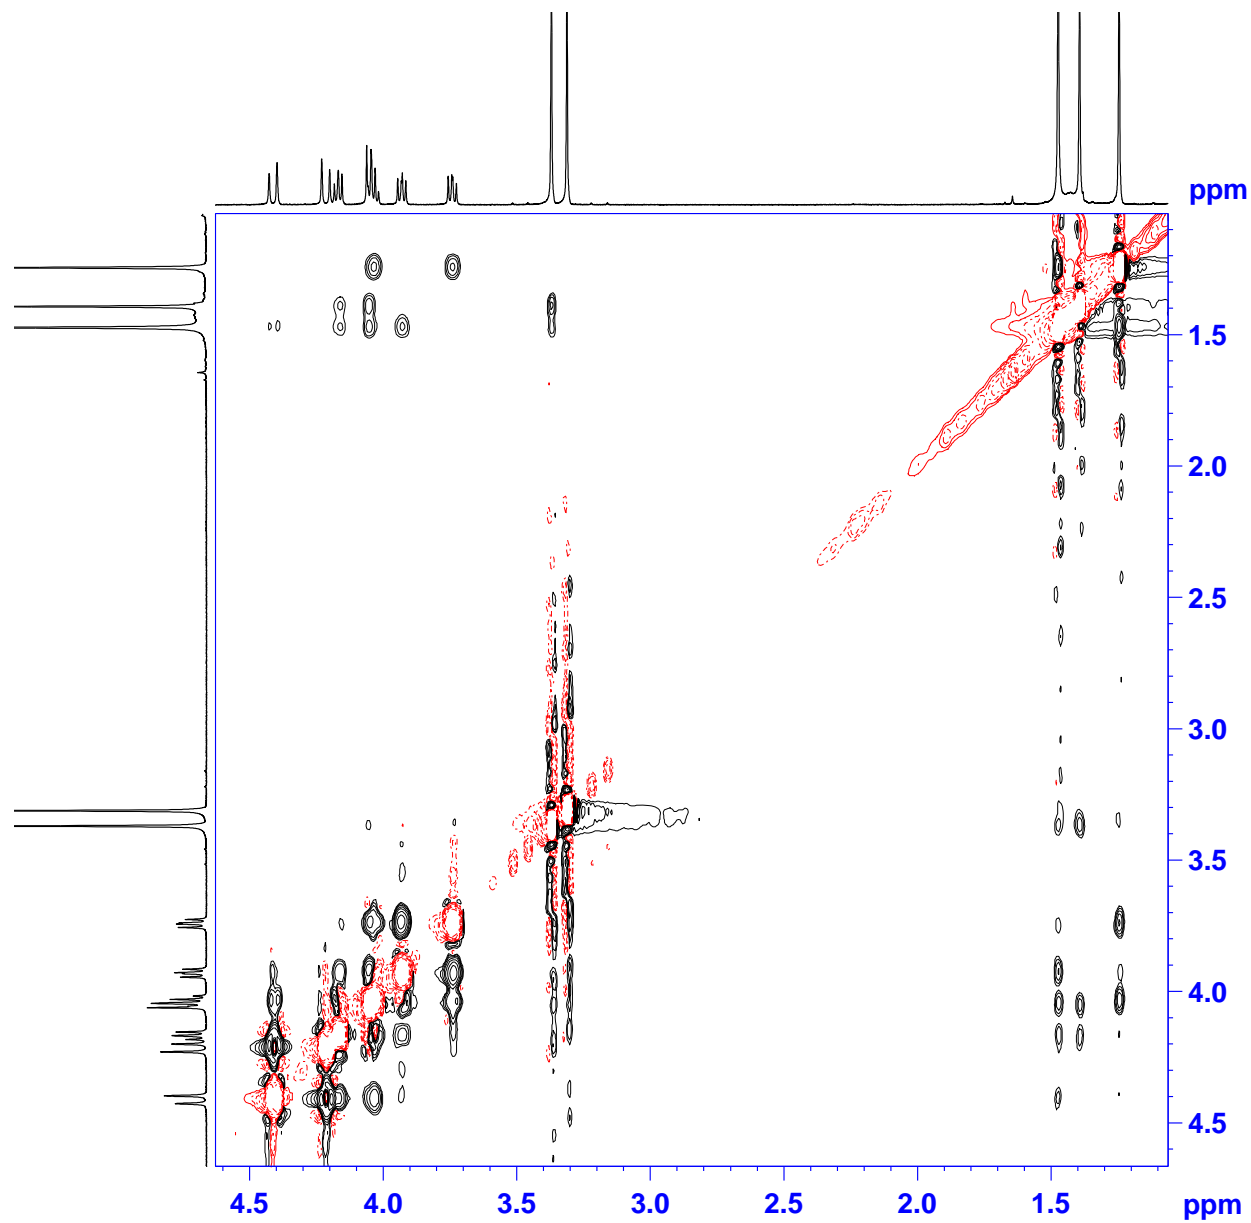

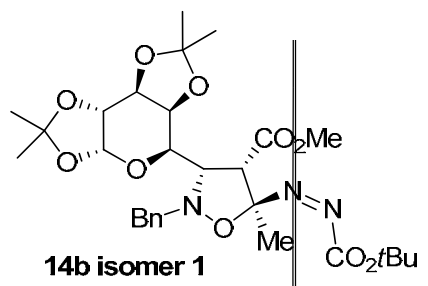

<sup>1</sup>H-NMR (C<sub>6</sub>D<sub>6</sub>, 400 MHz)

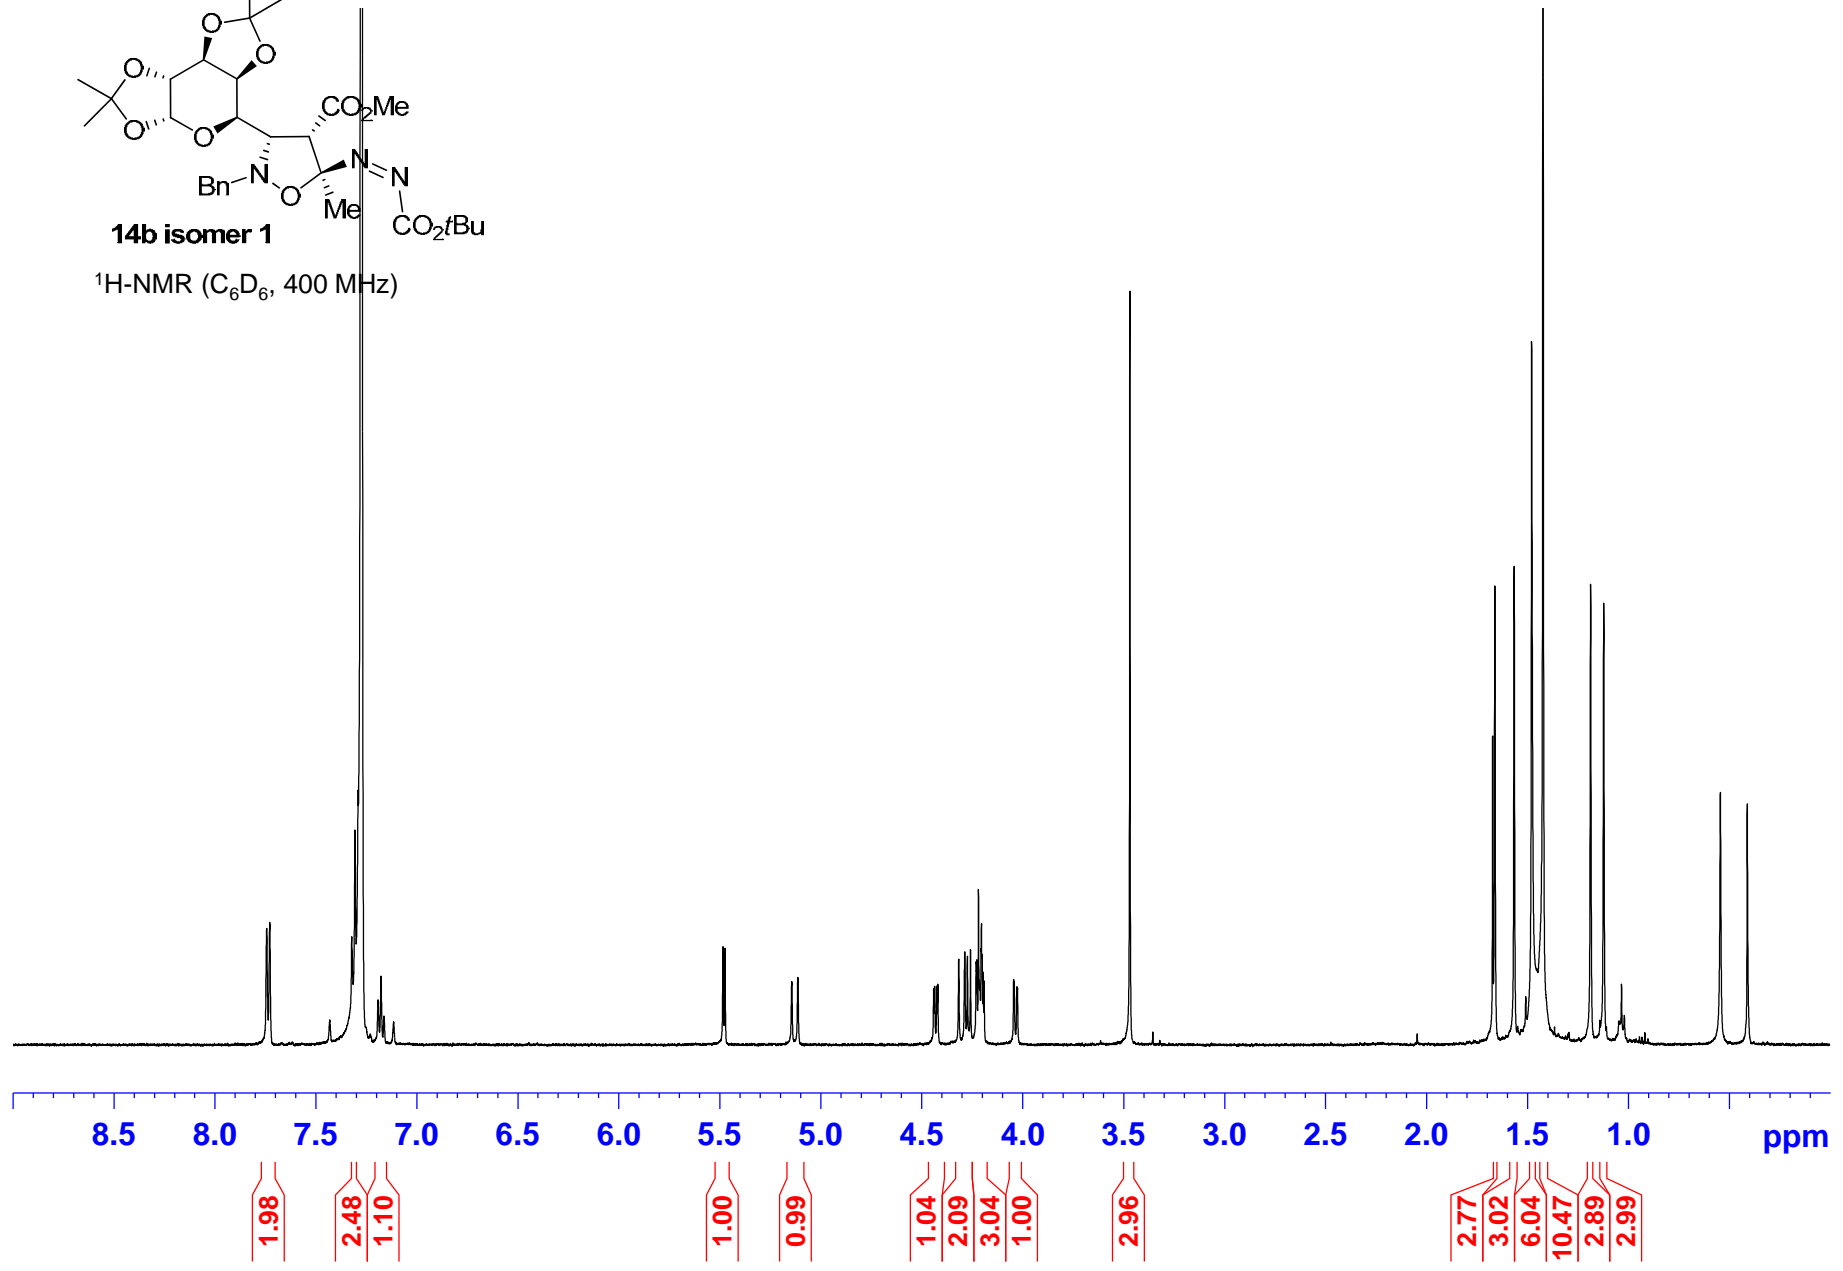

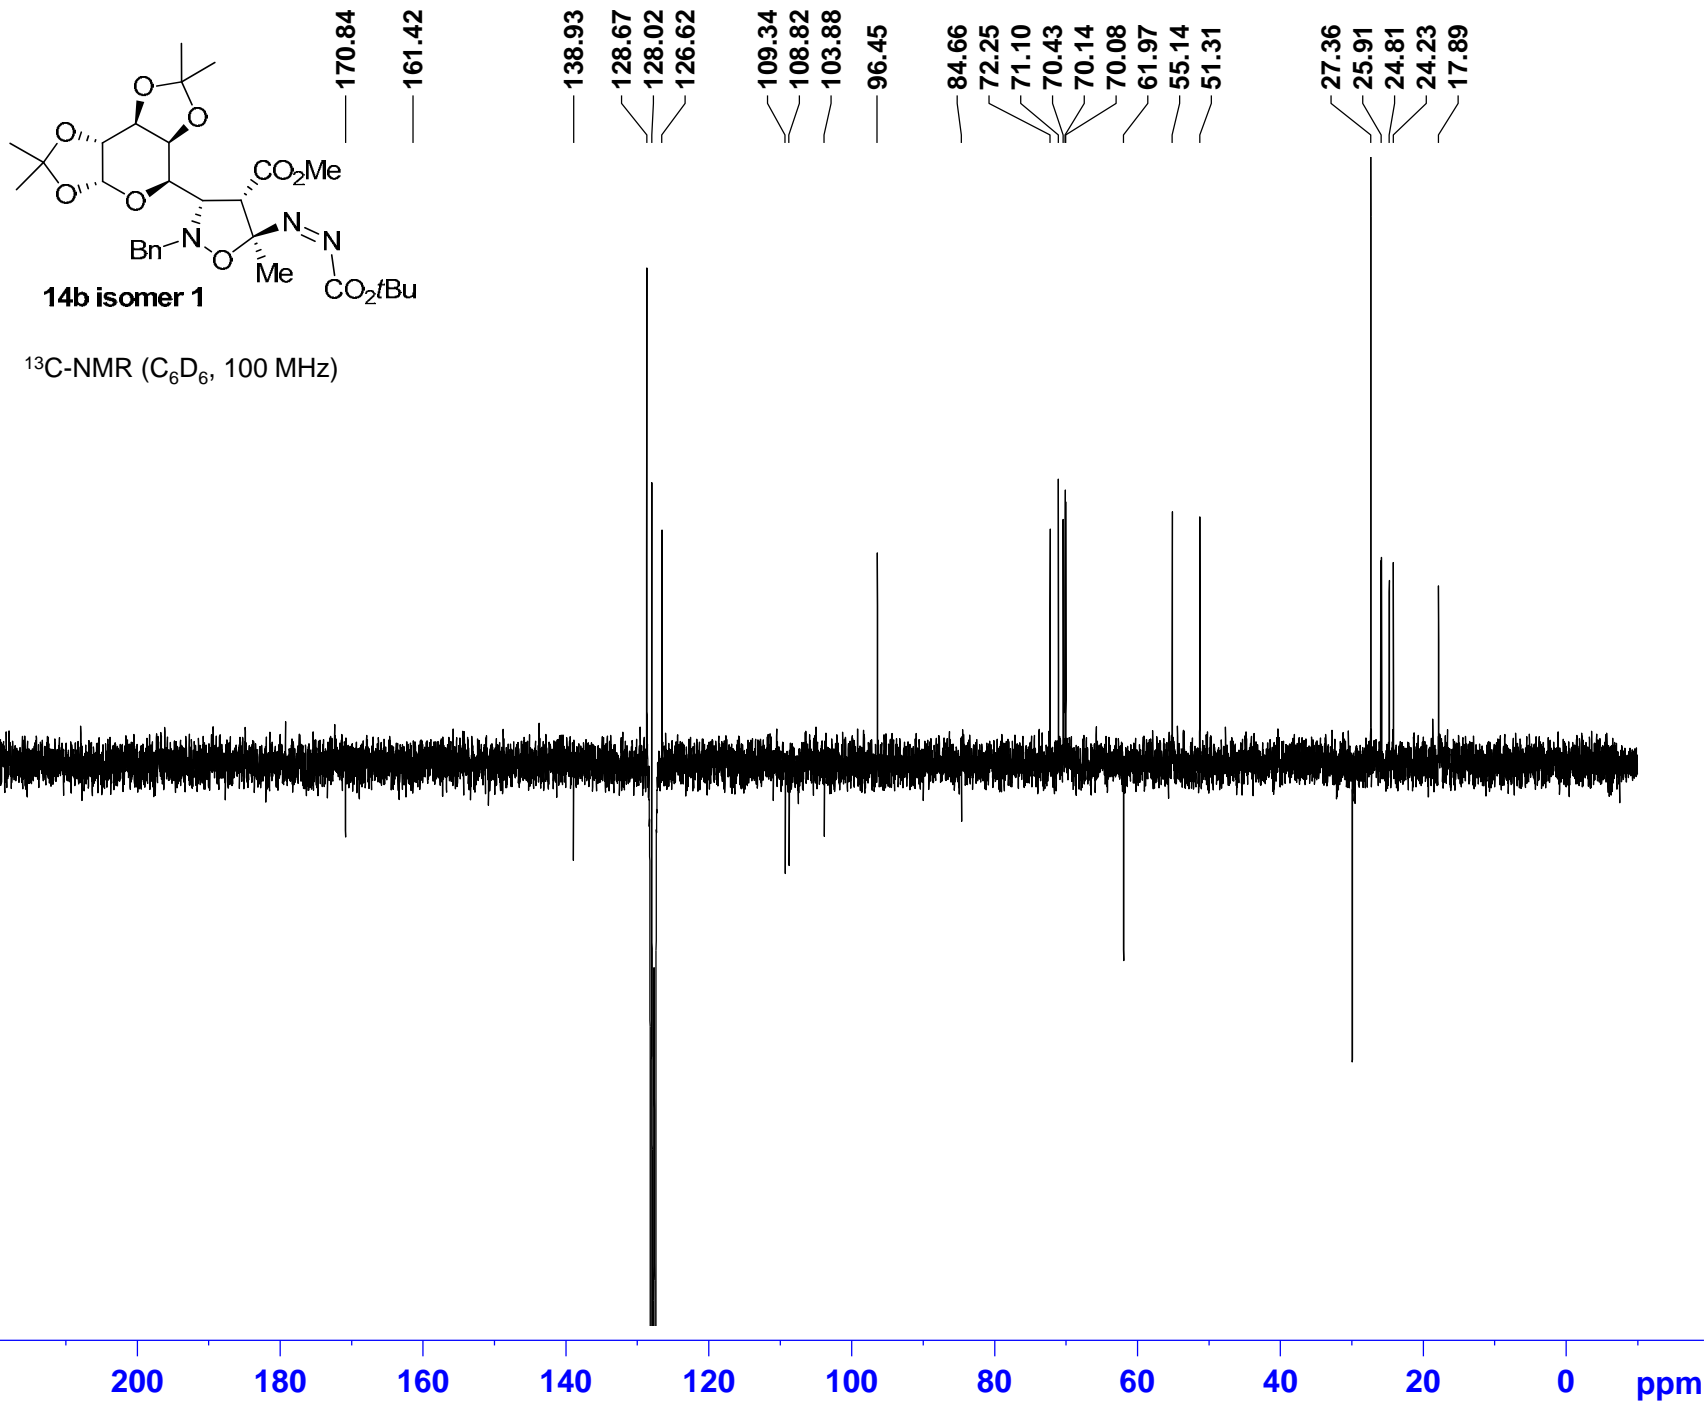



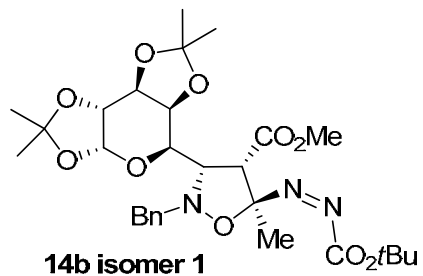

NOESY (C<sub>6</sub>D<sub>6</sub>, 500 MHz)

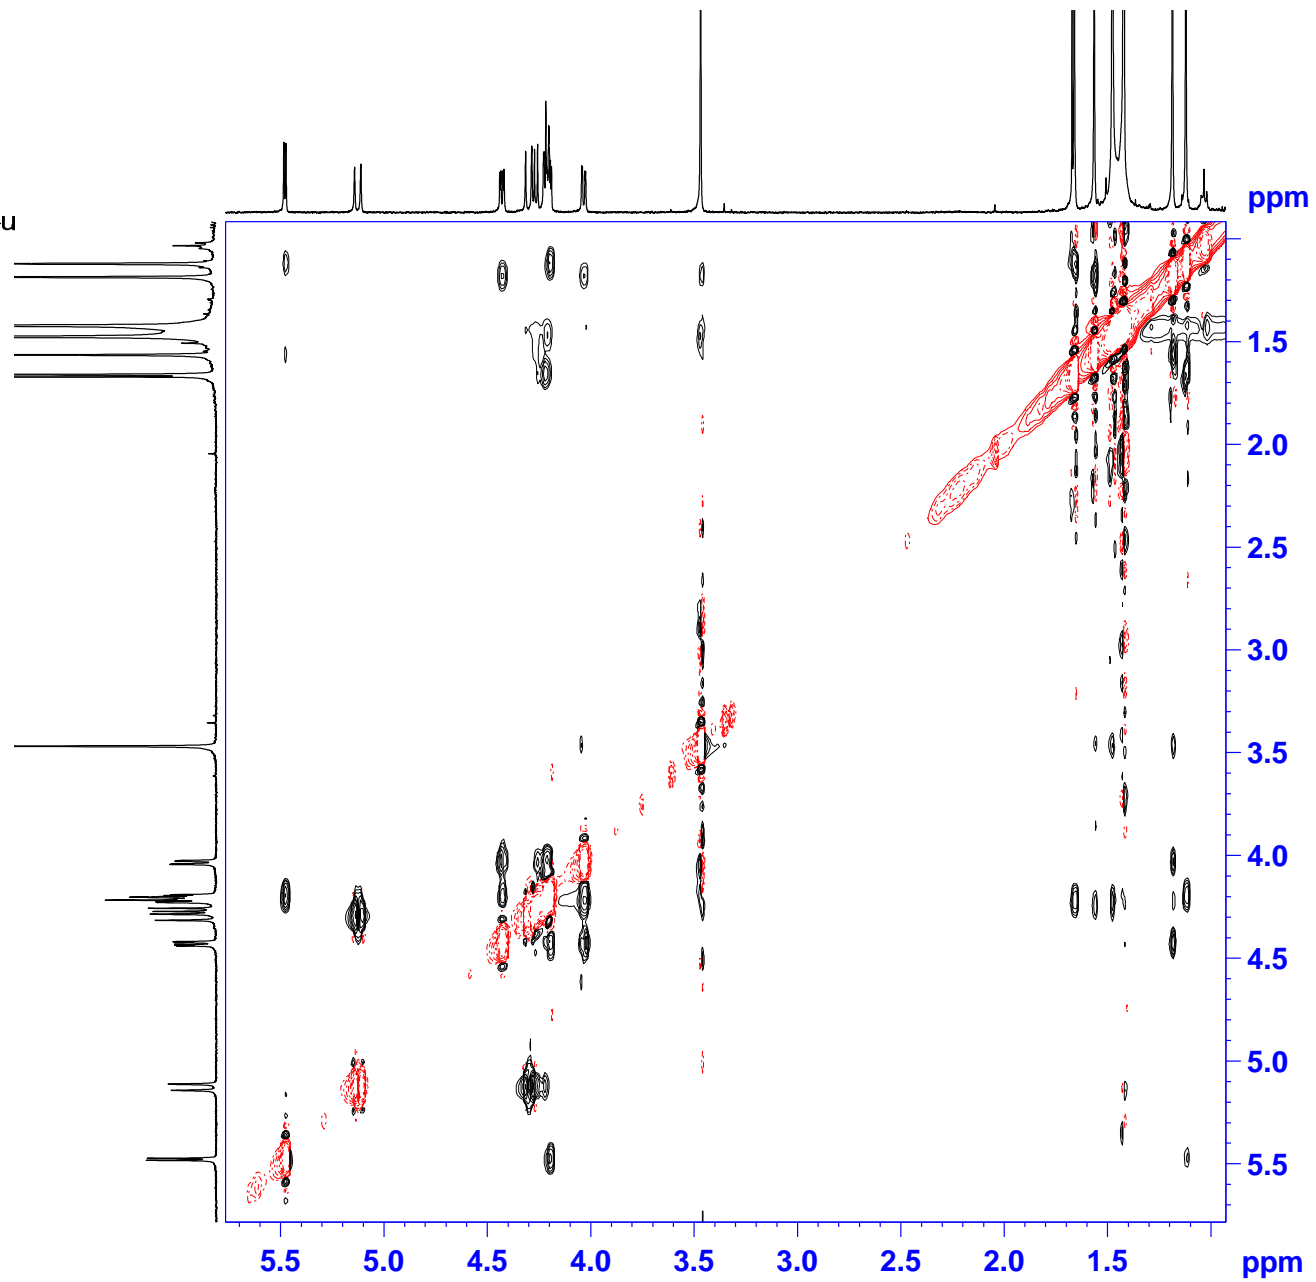

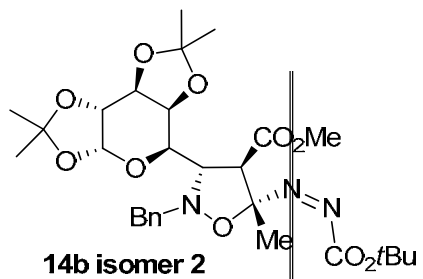

$^1\text{H-NMR}$  ( $\text{C}_6\text{D}_6$ , 500 MHz)

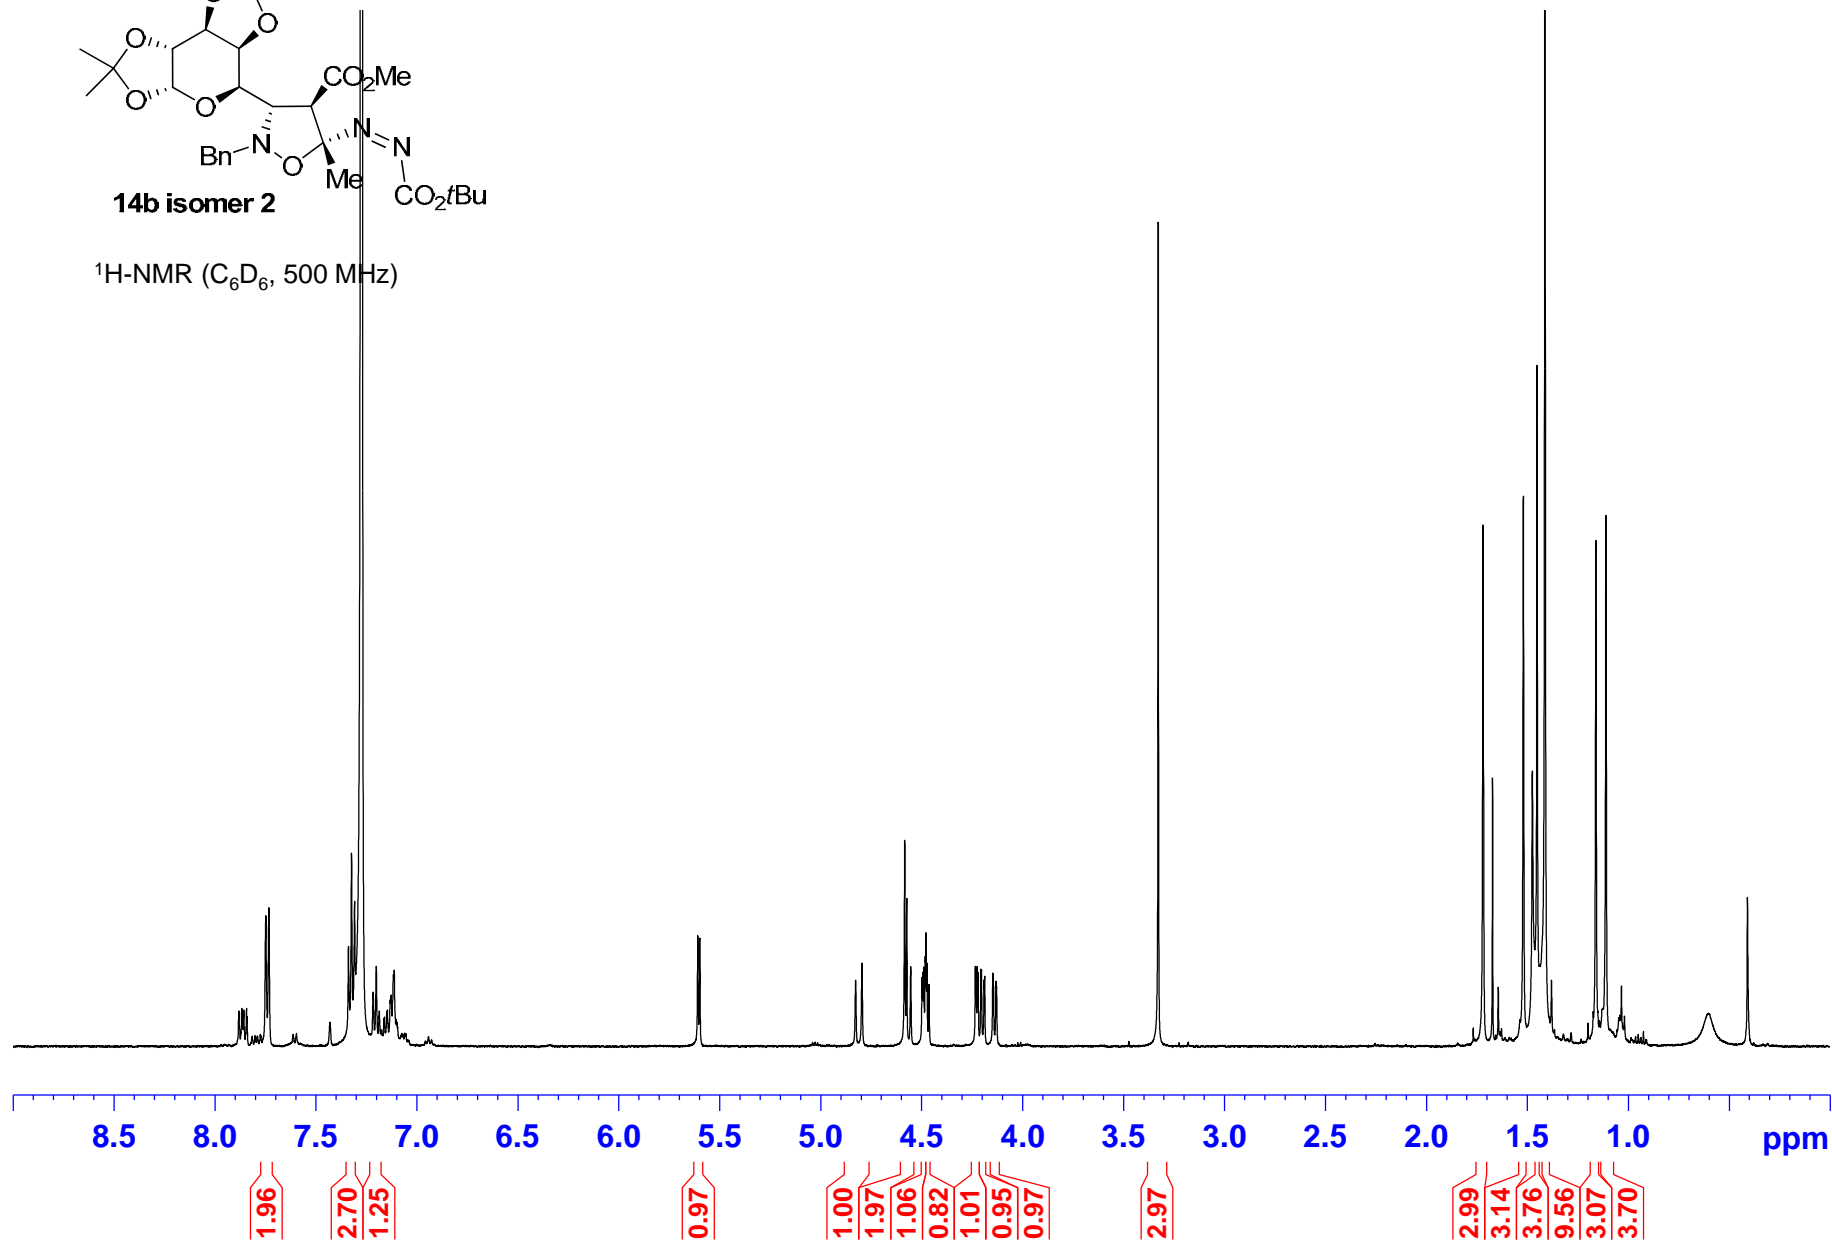

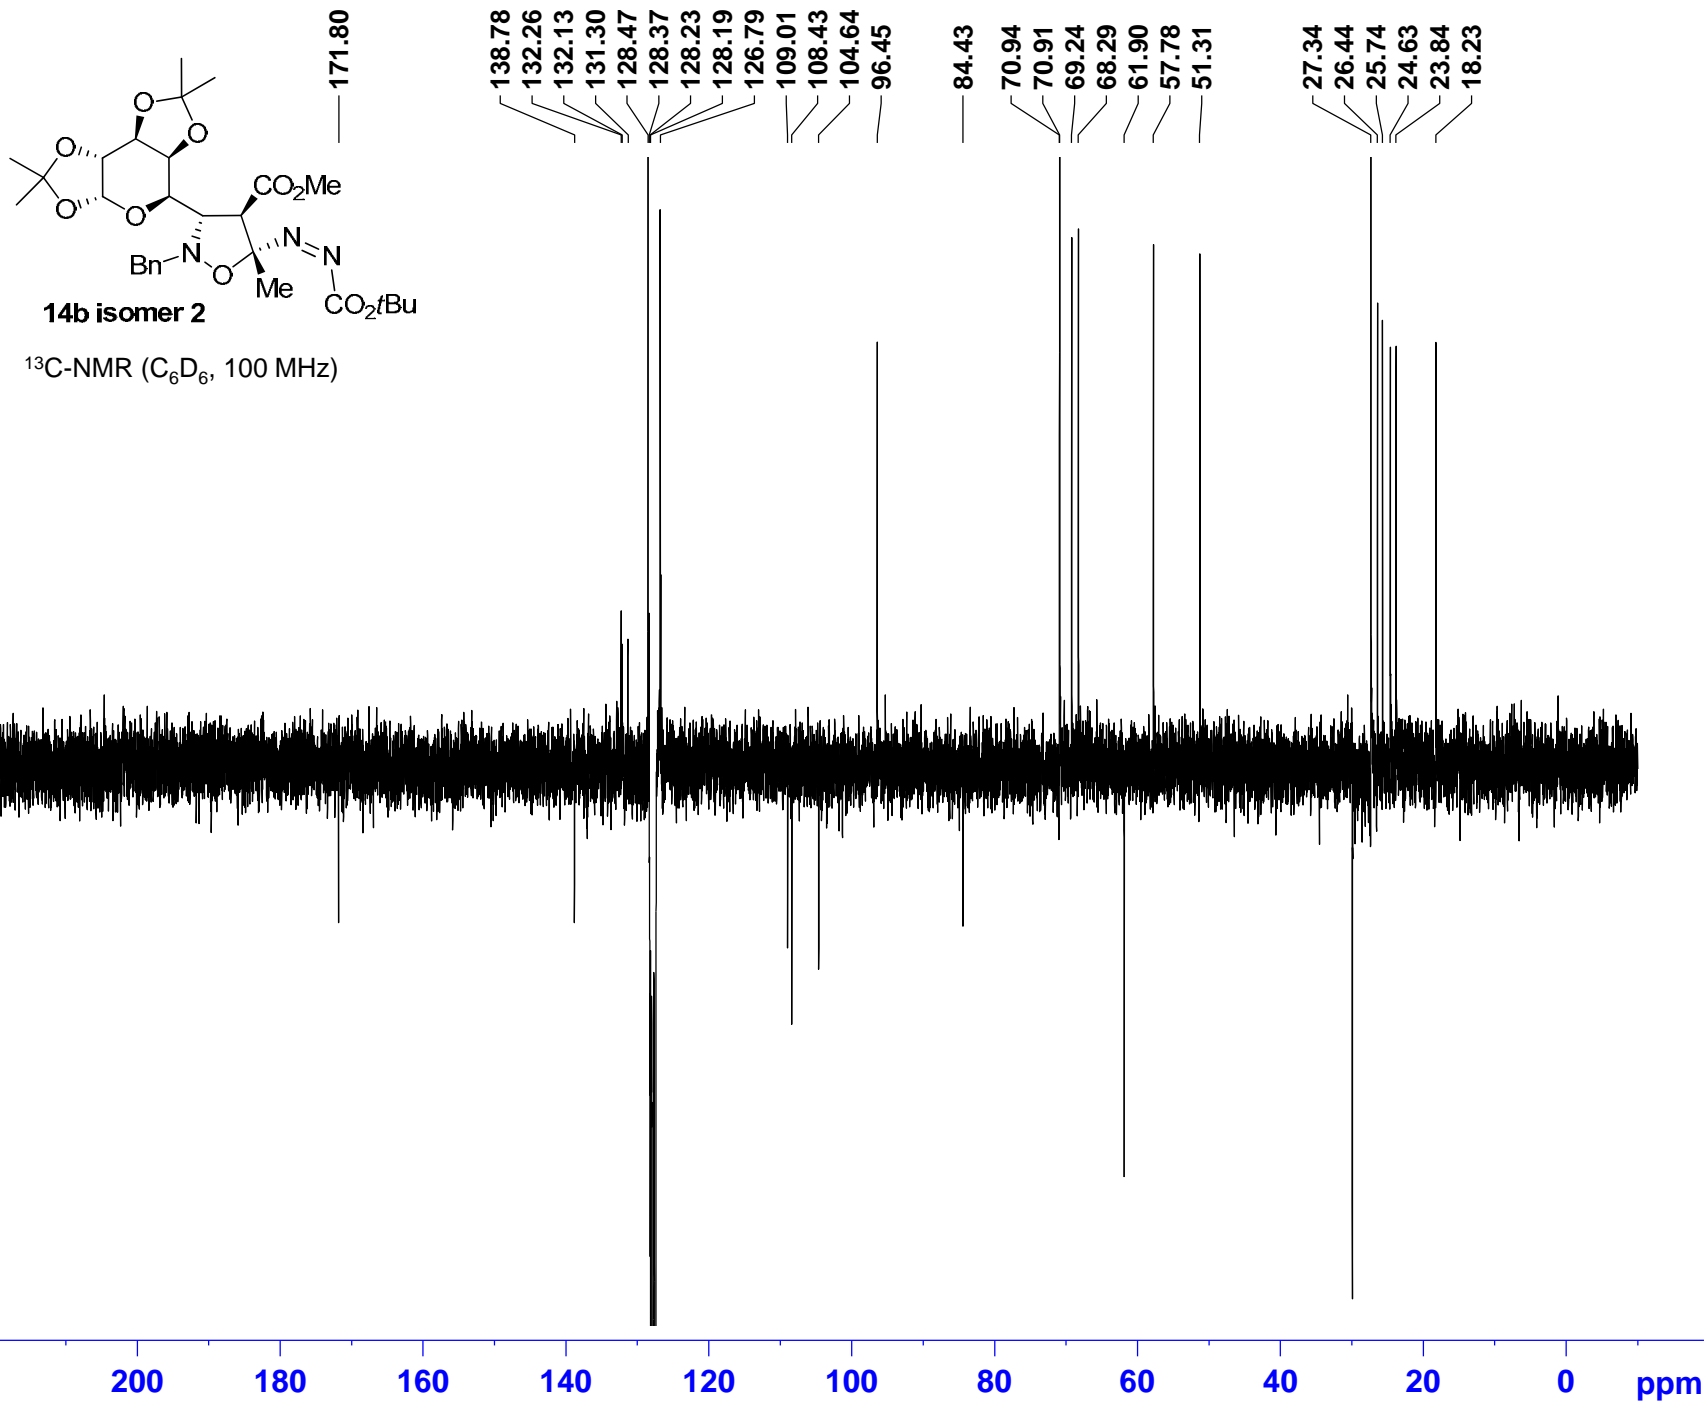

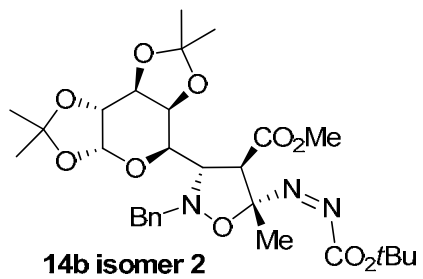

NOESY (C<sub>6</sub>D<sub>6</sub>, 500 MHz)

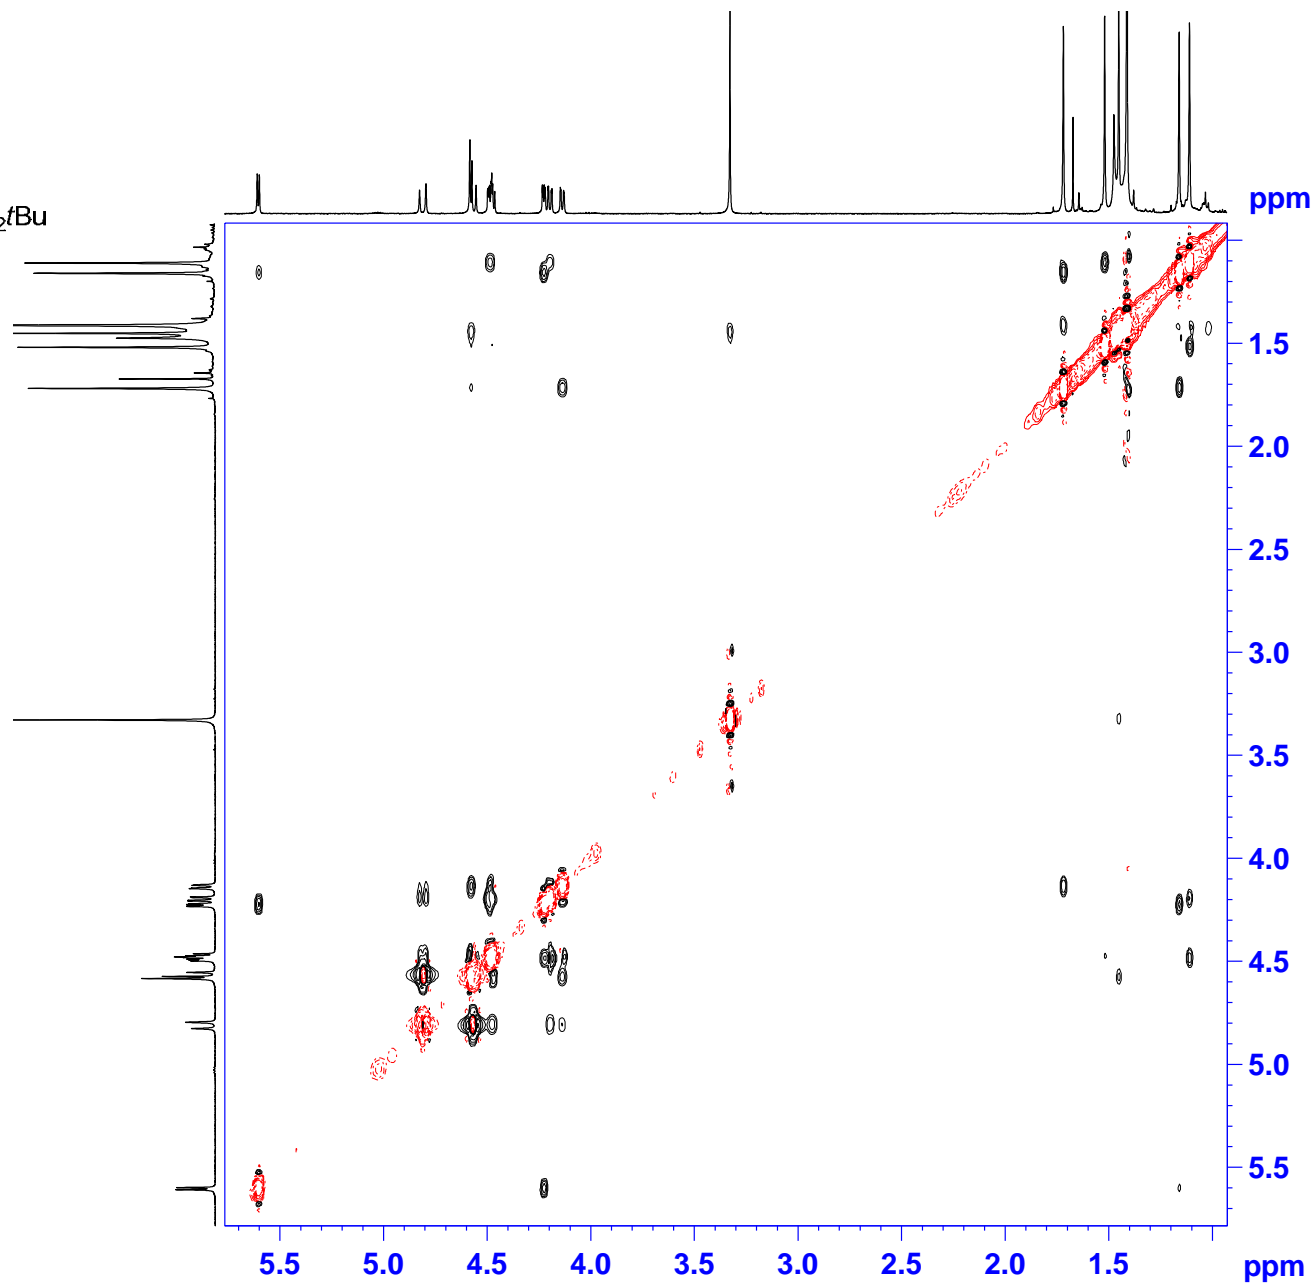

Supplement: c4ob01371a1.pdf [file c4ob01371a1.pdf]
